# Supplementary material for: A color-spectral machine learning path for analysis of five mixed amino acids
Source: Royal Society of Chemistry journal article supplement (doi:10.1039/c9cc07186e), 2019-12-11
Supplement: c9cc07186e2.xlsx [file c9cc07186e2.xlsx]

## Sheet: Table S4
						Table S4 Actual and predicted concentration data
									System I: 5-dimensional amino acid samples (bulk solution: water)
Entry	Configuration concentration(mg/L)
	Actual values						Predicted values
	[His]	[Arg]		[L-Phe]	[Ala]	[Thr]	[His]	[Arg]	[L-Phe]	[Ala]	[Thr]
	Training set
1	19.49	19.49		1.91	1.91	1.91	41.45	39.7	30.89	52.31	20.36
2	19.49	19.49		4.84	4.84	3.38	40.79	38.61	31.88	52.41	21.55
3	19.49	19.49		6.31	6.31	6.31	41.68	40.03	32.52	54.01	22.3
4	19.49	19.49		9.24	7.77	7.77	41.86	39.87	35.32	56.07	24.09
5	19.49	19.49		13.63	12.17	12.17	41.71	39.79	35.1	55.85	23.93
6	19.49	19.49		16.56	15.1	13.63	44.05	41.73	45.6	65.7	34.04
7	19.49	19.49		18.03	16.56	15.1	44.68	42.08	46.14	66.49	33.84
8	19.49	19.49		20.96	19.49	16.56	44.41	41.94	44.65	64.79	32.87
9	19.49	19.49		25.35	23.89	20.96	44.84	41.49	45.31	65.85	32.38
10	19.49	19.49		26.82	25.35	22.42	42.64	38.54	51.23	69.18	37.52
11	19.49	19.49		29.75	26.82	25.35	42.64	38.54	51.23	69.18	37.52
12	19.49	19.49		31.21	29.75	26.82	42.64	38.54	51.23	69.18	37.52
13	19.49	19.49		37.07	34.14	29.75	42.33	38.41	53.28	70.77	39.49
14	19.49	19.49		38.54	35.61	32.68	42.29	38.39	53.17	70.71	39.46
15	19.49	19.49		41.47	38.54	34.14	42.74	37.98	63.84	79.56	49.7
16	19.49	19.49		42.93	40	35.61	43.38	39.22	59.46	76.61	45.94
17	19.49	19.49		47.33	44.4	40	41.59	36.38	63	76.65	48.44
18	19.49	19.49		50.26	45.86	41.47	41.59	36.38	63	76.65	48.44
19	19.49	19.49		51.72	48.79	42.93	41.59	36.38	63	76.65	48.44
20	19.49	19.49		54.65	50.26	45.86	41.14	36.04	70.29	82.82	54.47
21	19.49	19.49		59.05	54.65	48.79	40.72	35.54	71.63	83.33	55.48
22	19.49	19.49		60.51	56.12	51.72	40.57	36.23	71.16	83.5	56.27
23	19.49	19.49		63.44	59.05	53.19	36.06	31.59	84.29	91.61	68.47
24	19.49	19.49		66.38	60.51	54.65	36.06	31.59	84.29	91.61	68.47
25	19.49	19.49		70.77	64.91	59.05	36.06	31.59	84.29	91.61	68.47
26	19.49	19.49		72.24	67.84	60.51	36.06	31.59	84.29	91.61	68.47
27	19.49	19.49		75.17	69.31	61.98	36.06	31.59	84.29	91.61	68.47
28	19.49	19.49		76.63	70.77	64.91	38.24	31.45	95.02	101.34	76.15
29	19.49	19.49		81.03	75.17	67.84	34.73	29.44	101.06	104.74	81.52
30	19.49	19.49		83.96	78.1	69.31	34.73	29.44	101.06	104.74	81.52
31	19.49	19.49		85.42	79.56	72.24	34.73	29.44	101.06	104.74	81.52
32	19.49	19.49		88.35	81.03	73.7	34.73	29.44	101.06	104.74	81.52
33	19.49	19.49		92.75	85.42	78.1	34.73	29.44	101.06	104.74	81.52
34	19.49	19.49		94.21	88.35	79.56	35.1	29.68	101.68	104.94	81.51
35	19.49	19.49		97.14	89.82	81.03	32.99	26.88	107.38	109.38	85.81
36	19.49	19.49		98.61	92.75	82.49	33.72	27.88	107.37	110.13	85.85
37	19.49	19.49		103	95.68	86.89	31.45	27.83	114	113.49	93.83
38	19.49	19.49		105.93	98.61	88.35	31.45	27.83	114	113.49	93.83
39	19.49	19.49		108.86	100.07	89.82	31.45	27.83	114	113.49	93.83
40	19.49	19.49		110.33	103	92.75	31.45	27.83	114	113.49	93.83
41	19.49	19.49		114.72	105.93	95.68	30.87	27.91	116.17	115.52	95.94
42	19.49	19.49		117.65	108.86	97.14	30.04	26.94	122.54	119.33	101.43
43	19.49	19.49		119.12	110.33	100.07	30.04	26.94	122.54	119.33	101.43
44	19.49	19.49		122.05	113.26	101.54	30.04	26.94	122.54	119.33	101.43
45	19.49	19.49		126.44	116.19	104.47	30.04	26.94	122.54	119.33	101.43
46	19.49	19.49		127.91	119.12	107.4	30.04	26.94	122.54	119.33	101.43
47	19.49	19.49		130.84	120.58	108.86	30.04	26.94	122.54	119.33	101.43
48	19.49	19.49		132.3	123.51	110.33	30.74	27.55	120.43	118.02	99.55
49	19.49	19.49		136.7	126.44	114.72	25.03	21.49	144.95	135.81	120.56
50	19.49	19.49		139.63	129.37	116.19	25.25	21.8	144.05	135.4	119.87
51	19.49	19.49		141.09	130.84	117.65	24.18	21.24	150.37	140.1	126.55
52	19.49	19.49		144.03	133.77	120.58	24.18	21.24	150.37	140.1	126.55
53	19.49	19.49		148.42	136.7	123.51	24.18	21.24	150.37	140.1	126.55
54	19.49	19.49		149.89	139.63	124.98	24.18	21.24	150.37	140.1	126.55
55	19.49	19.49		152.82	141.09	127.91	24.01	20.64	150.99	140	126.51
56	19.49	19.49		154.28	142.56	129.37	25.68	24.9	171.43	161	142.21
57	19.49	19.49		158.68	146.96	132.3	25.82	24.88	170.96	160.17	141.87
58	19.49	19.49		161.61	149.89	135.23	24.44	23.49	175.7	162.46	145.97
59	19.49	19.49		163.07	151.35	136.7	24.44	23.49	175.7	162.46	145.97
60	19.49	19.49		166	152.82	138.16	24.44	23.49	175.7	162.46	145.97
61	19.49	19.49		170.4	157.21	142.56	24.93	23.36	174.9	161.62	145.12
62	19.49	19.49		171.86	160.14	144.03	24.37	23.07	193.91	179.7	163.28
63	19.49	19.49		174.79	161.61	145.49	24.69	24.12	192.59	179.69	162.45
64	19.49	19.49		176.26	163.07	146.96	24.74	24.14	192.66	179.76	162.5
65	19.49	19.49		180.65	167.47	151.35	24.37	23.07	193.91	179.7	163.28
66	19.49	19.49		182.12	168.93	152.82	24.37	23.07	193.91	179.7	163.28
67	19.49	19.49		185.05	171.86	154.28	24.37	23.07	193.91	179.7	163.28
68	19.49	19.49		186.51	173.33	155.75	24.69	24.12	192.59	179.69	162.45
69	19.49	19.49		190.91	177.72	160.14	17.06	21.8	217.17	197.86	180.4
70	19.49	19.49		193.84	179.19	161.61	17.06	21.8	217.17	197.86	180.4
71	19.49	19.49		195.3	182.12	163.07	17.06	21.8	217.17	197.86	180.4
72	19.49	19.49		198.23	183.58	166	18.51	21.7	216.99	198.03	180.42
73	19.49	19.49		202.63	187.98	168.93	18.51	21.7	216.99	198.03	180.42
74	19.49	19.49		204.09	189.44	170.4	17.1	21.36	217.31	197.32	181.07
75	19.49	19.49		207.02	192.37	173.33	18.04	21.05	217.36	197.39	181.3
76	19.49	19.49		208.49	193.84	174.79	17.9	16.34	234.66	211.02	190.43
77	19.49	19.49		212.88	198.23	177.72	17.9	16.34	234.66	211.02	190.43
78	19.49	19.49		215.81	199.7	179.19	17.9	16.34	234.66	211.02	190.43
79	19.49	19.49		217.28	201.16	182.12	17.9	16.34	234.66	211.02	190.43
80	19.49	19.49		220.21	204.09	183.58	16.81	15.86	237.04	212.61	192.85
81	19.49	19.49		223.14	207.02	186.51	16.81	15.86	237.04	212.61	192.85
82	19.49	19.49		226.07	209.95	189.44	16.57	15.23	239.5	215.51	195.26
83	19.49	19.49		227.54	211.42	190.91	18.64	13.58	270.25	244.31	215.58
84	19.49	19.49		230.47	214.35	192.37	18.64	13.58	270.25	244.31	215.58
85	19.49	19.49		234.86	217.28	196.77	18.64	13.58	270.25	244.31	215.58
86	19.49	19.49		236.33	220.21	198.23	18.64	13.58	270.25	244.31	215.58
87	19.49	19.49		239.26	221.67	199.7	18.64	13.58	270.25	244.31	215.58
88	19.49	19.49		240.72	223.14	201.16	17.93	12.53	276.69	250.71	221.5
89	19.49	19.49		245.12	227.54	205.56	18.21	12.69	277.5	251.86	222.38
90	19.49	19.49		248.05	229	207.02	17.93	12.53	276.69	250.71	221.5
91	19.49	19.49		249.51	231.93	208.49	17.93	12.53	276.69	250.71	221.5
92	19.49	19.49		250.98	233.4	209.95	17.93	12.53	276.69	250.71	221.5
93	19.49	19.49		255.37	237.79	214.35	17.93	12.53	276.69	250.71	221.5
94	19.49	19.49		258.3	239.26	215.81	17.93	12.53	276.69	250.71	221.5
95	19.49	19.49		259.77	240.72	217.28	21.86	14.04	287.08	262.09	230.45
96	19.49	19.49		262.7	243.65	218.74	21.25	13.82	289.24	263.14	233.56
97	19.49	19.49		267.09	246.58	223.14	20.09	16.51	303.13	279.88	250.4
98	19.49	19.49		268.56	249.51	224.61	20.09	16.51	303.13	279.88	250.4
99	19.49	19.49		271.49	250.98	226.07	20.09	16.51	303.13	279.88	250.4
100	19.49	19.49		272.95	253.91	227.54	20.09	16.51	303.13	279.88	250.4
101	19.49	19.49		277.35	256.84	231.93	20.64	17.24	303.71	280.21	251.79
102	19.49	19.49		278.81	259.77	233.4	20.64	17.24	303.71	280.21	251.79
103	19.49	19.49		281.74	261.23	234.86	20.09	16.51	303.13	279.88	250.4
104	19.49	19.49		283.21	262.7	236.33	20.09	16.51	303.13	279.88	250.4
105	19.49	19.49		287.6	267.09	240.72	20.09	16.51	303.13	279.88	250.4
106	19.49	19.49		290.53	268.56	242.19	20.09	16.51	303.13	279.88	250.4
107	19.49	19.49		292	271.49	243.65	20.09	16.51	303.13	279.88	250.4
108	19.49	19.49		293.46	272.95	245.12	20.64	17.24	303.71	280.21	251.79
109	19.49	19.49		297.86	277.35	249.51	20.43	19.54	314.51	290.19	259.99
110	19.49	19.49		300.79	278.81	250.98	20.26	18.63	312.54	288.39	257.56
111	19.49	19.49		302.26	280.28	252.44	20.17	18.59	312.37	288.23	257.37
112	19.49	19.49		305.19	283.21	253.91	22.42	19.48	319.13	294.89	264.96
113	19.49	19.49		308.12	286.14	258.3	22.42	19.48	319.13	294.89	264.96
114	19.49	19.49		311.05	289.07	259.77	22.42	19.48	319.13	294.89	264.96
115	19.49	19.49		312.51	290.53	261.23	22.95	20.34	319.93	295.56	265.51
116	19.49	19.49		315.44	292	262.7	26.46	17.64	333.68	304.36	279.39
117	19.49	19.49		319.84	296.39	267.09	26.93	17.74	334.02	304.8	279.42
118	19.49	19.49		321.3	297.86	268.56	27.71	15.38	338.31	307.15	283.6
119	19.49	19.49		322.77	299.32	270.02	27.71	15.38	338.31	307.15	283.6
120	19.49	19.49		325.7	302.26	271.49	27.71	15.38	338.31	307.15	283.6
121	19.49	19.49		330.09	305.19	275.88	28.55	15.53	341.29	309.8	285.53
122	38.54	19.49		331.56	308.12	277.35	28.55	15.53	341.29	309.8	285.53
123	38.54	19.49		333.02	309.58	278.81	28.22	18.31	343.5	314.49	289.32
124	38.54	19.49		335.95	311.05	280.28	29	19.28	346.13	316.74	291.31
125	38.54	19.49		340.35	315.44	283.21	30.69	17.63	354.89	323.93	299.64
126	38.54	19.49		341.81	316.91	286.14	30.69	17.63	354.89	323.93	299.64
127	38.54	19.49		343.28	318.37	287.6	30.69	17.63	354.89	323.93	299.64
128	38.54	19.49		346.21	321.3	289.07	30.99	17.83	356.06	324.7	299.83
129	38.54	19.49		350.6	324.23	292	38.88	17.26	361.6	331.39	303.54
130	38.54	19.49		352.07	327.16	294.93	38.72	17.25	361.92	331.76	303.95
131	38.54	19.49		353.53	328.63	296.39	38.72	17.25	361.92	331.76	303.95
132	38.54	19.49		356.46	330.09	297.86	37.51	19.66	368.85	338.18	308.72
133	38.54	19.49		360.86	334.49	300.79	37.51	19.66	368.85	338.18	308.72
134	38.54	19.49		362.32	335.95	302.26	37.51	19.66	368.85	338.18	308.72
135	38.54	19.49		363.79	338.88	305.19	38.3	19.48	372.35	341.08	311.64
136	38.54	19.49		366.72	340.35	306.65	38.3	19.48	372.35	341.08	311.64
137	38.54	19.49		371.11	343.28	309.58	38.8	19.56	383.81	348.7	324.17
138	38.54	19.49		372.58	346.21	311.05	38.71	19.47	384.29	349.15	324.64
139	38.54	19.49		375.51	347.67	313.98	38.26	19.68	381.82	348.12	322.97
140	37.07	19.49		376.97	349.14	315.44	38.26	19.68	381.82	348.12	322.97
141	37.07	19.49		381.37	353.53	318.37	38.28	19.48	382.4	348.2	322.44
142	37.07	19.49		382.84	355	319.84	38.28	19.48	382.4	348.2	322.44
143	37.07	19.49		385.77	357.93	321.3	36	17.86	392.71	359.19	329.63
144	37.07	19.49		387.23	359.39	324.23	36.31	17.27	390.2	356.7	327.56
145	37.07	19.49		391.63	362.32	327.16	37.05	18.89	403.36	369.37	336.42
146	37.07	19.49		393.09	365.25	328.63	37.05	18.89	403.36	369.37	336.42
147	37.07	19.49		394.56	366.72	330.09	37.05	18.89	403.36	369.37	336.42
148	37.07	19.49		397.49	368.18	331.56	37.15	19	401.34	367.29	334.65
149	37.07	19.49		401.88	372.58	335.95	36.85	17.22	409.22	373.08	342.74
150	37.07	19.49		403.35	374.04	337.42	36.7	17.45	406.93	370.8	341.19
151	37.07	19.49		404.81	375.51	338.88	36.85	17.49	406.88	371.27	340.65
152	37.07	19.49		407.74	378.44	340.35	36.85	17.49	406.88	371.27	340.65
153	37.07	19.49		412.14	381.37	343.28	36.32	18.3	413.29	376.13	346.08
154	37.07	19.49		413.6	384.3	346.21	36.32	18.3	413.29	376.13	346.08
155	37.07	19.49		415.07	385.77	347.67	36.8	17.82	415.26	378.15	347.61
156	37.07	19.49		418	387.23	349.14	37.05	19.85	431.56	392.51	354.81
157	37.07	19.49		422.39	391.63	352.07	37.05	19.85	431.56	392.51	354.81
158	37.07	19.49		423.86	393.09	353.53	36.39	19.37	432.6	392.79	354.5
159	37.07	19.49		425.32	394.56	356.46	36.31	19.43	432.37	392.63	354.77
160	37.07	19.49		428.25	397.49	357.93	36.31	19.43	432.37	392.63	354.77
161	37.07	18.03		431.18	400.42	359.39	36.34	18.82	434.35	394.89	354.34
162	37.07	18.03		434.11	401.88	359.39	36.3	18.79	434.39	394.9	354.37
163	37.07	18.03		435.58	404.81	359.39	37.43	19.5	454.49	410.83	362.72
164	37.07	18.03		438.51	406.28	359.39	37.43	19.5	454.49	410.83	362.72
165	37.07	18.03		441.44	410.67	359.39	37.01	20.03	454.71	409.55	362.86
166	37.07	18.03		444.37	412.14	359.39	37.02	19.93	455.49	410.34	363.47
167	37.07	18.03		445.83	413.6	359.39	37.02	19.93	455.49	410.34	363.47
168	37.07	18.03		448.76	416.53	357.93	37.07	19.32	458.71	414.58	362.35
169	37.07	18.03		451.69	419.46	357.93	37.17	20.76	463.24	421.76	363.69
170	37.07	18.03		454.62	420.93	357.93	37.17	20.76	463.24	421.76	363.69
171	37.07	18.03		456.09	423.86	357.93	37.17	20.76	463.24	421.76	363.69
172	37.07	18.03		459.02	425.32	357.93	37.32	20.52	466.69	424.34	364.44
173	37.07	18.03		461.95	429.72	357.93	37.48	20.75	467.06	424.81	364.83
174	37.07	18.03		464.88	431.18	357.93	38.88	19.11	469.86	425.96	363.68
175	37.07	18.03		466.35	432.65	357.93	39.12	20.22	472.97	429.82	365.08
176	37.07	18.03		469.28	435.58	357.93	39.16	20.08	473.06	429.81	365.08
177	37.07	18.03		472.21	438.51	357.93	35.67	17.86	471.51	429.32	361.89
178	37.07	18.03		475.14	439.97	357.93	35.98	18.39	473.06	431.11	360.82
179	37.07	18.03		476.6	442.9	357.93	35.75	18.16	472.67	431.17	360.75
180	37.07	18.03		479.53	444.37	357.93	35.75	18.16	472.67	431.17	360.75
181	37.07	18.03		482.46	448.76	357.93	35.02	19.71	482.57	439.3	364.77
182	37.07	18.03		485.39	450.23	357.93	36.72	18.45	488.1	444.04	359.79
183	37.07	18.03		486.86	451.69	356.46	36.72	18.45	488.1	444.04	359.79
184	37.07	18.03		489.79	453.16	356.46	36.72	18.45	488.1	444.04	359.79
185	37.07	18.03		492.72	457.55	356.46	36.72	18.45	488.1	444.04	359.79
186	37.07	18.03		495.65	459.02	356.46	38.3	19.17	490.52	447.56	358.13
187	37.07	18.03		497.11	461.95	356.46	38.08	19.19	491.29	448.15	358.46
188	37.07	18.03		500.04	463.42	356.46	38.08	19.19	491.29	448.15	358.46
189	37.07	18.03		502.97	466.35	356.46	38.23	19.53	498.01	456.57	358.64
190	37.07	18.03		505.9	469.28	356.46	38.14	20.01	509.68	469.57	361.43
191	37.07	18.03		507.37	470.74	356.46	38.14	20.01	509.68	469.57	361.43
192	37.07	18.03		508.83	472.21	356.46	38.14	20.01	509.68	469.57	361.43
193	37.07	18.03		513.23	476.6	356.46	37.48	19.78	514.68	473	360.19
194	37.07	18.03		516.16	478.07	356.46	37.39	19.91	514.25	472.56	360.3
195	37.07	18.03		517.62	479.53	356.46	37.39	19.91	514.25	472.56	360.3
196	37.07	18.03		519.09	482.46	356.46	37.93	20.42	518.25	477.13	359.12
197	37.07	18.03		523.48	485.39	356.46	37.32	19.63	531.82	489.33	358.52
198	37.07	18.03		526.41	488.32	356.46	37.32	19.63	531.82	489.33	358.52
199	37.07	18.03		527.88	489.79	355	37.32	19.63	531.82	489.33	358.52
200	37.07	18.03		529.34	491.25	355	37.32	19.63	531.82	489.33	358.52
201	37.07	18.03		533.74	495.65	355	37.11	20.15	535.26	491.77	357.83
202	37.07	18.03		535.2	497.11	355	38.22	19.99	538.62	496.12	354.41
203	37.07	18.03		538.14	498.58	355	36.83	19.08	549.94	502.99	358.25
204	37.07	18.03		539.6	501.51	355	36.83	19.08	549.94	502.99	358.25
205	37.07	18.03		544	504.44	355	36.83	19.08	549.94	502.99	358.25
206	37.07	18.03		545.46	505.9	355	36.83	19.08	549.94	502.99	358.25
207	37.07	18.03		548.39	508.83	355	36.83	19.08	549.94	502.99	358.25
208	37.07	18.03		549.86	510.3	355	36.63	19.7	553.18	506.77	358.2
209	37.07	18.03		554.25	513.23	355	36.7	20.83	567.11	521.43	356.3
210	37.07	18.03		555.72	516.16	355	36.7	20.83	567.11	521.43	356.3
211	37.07	18.03		558.65	517.62	355	36.7	20.83	567.11	521.43	356.3
212	37.07	18.03		560.11	519.09	355	36.7	20.83	567.11	521.43	356.3
213	37.07	18.03		564.51	523.48	355	36.7	20.83	567.11	521.43	356.3
214	37.07	18.03		565.97	524.95	355	35.14	19.85	581.07	536.74	352.37
215	37.07	18.03		567.44	526.41	355	34.97	20.07	580.96	536	351.7
216	37.07	18.03		570.37	529.34	353.53	34.93	20.03	581.03	535.94	351.83
217	37.07	18.03		573.3	532.27	353.53	35.14	19.85	581.07	536.74	352.37
218	37.07	18.03		576.23	533.74	353.53	35.14	19.85	581.07	536.74	352.37
219	37.07	18.03		577.69	536.67	353.53	35.14	19.85	581.07	536.74	352.37
220	37.07	18.03		580.62	538.14	353.53	35.14	19.85	581.07	536.74	352.37
221	37.07	18.03		583.55	541.07	353.53	34.97	20.07	580.96	536	351.7
222	37.07	18.03		586.48	544	353.53	34.93	20.03	581.03	535.94	351.83
223	37.07	18.03		587.95	545.46	353.53	36.38	20.65	592.09	547.43	352.03
224	37.07	18.03		589.41	546.93	353.53	36.41	20.58	590.83	546.71	351.82
225	37.07	18.03		593.81	551.32	353.53	34.42	20.03	597.86	549.54	353.54
226	37.07	18.03		595.27	552.79	353.53	34.42	20.03	597.86	549.54	353.54
227	37.07	18.03		598.2	554.25	353.53	34.42	20.03	597.86	549.54	353.54
228	37.07	18.03		599.67	557.18	353.53	34.66	19.67	598.28	550.2	353.47
229	37.07	18.03		604.06	560.11	353.53	34.99	19.22	603.55	554.58	351.33
230	37.07	18.03		605.53	561.58	353.53	34.77	20.28	609.97	560.45	351.09
231	37.07	18.03		608.46	564.51	353.53	34.81	20.12	609.92	560.14	351.23
232	37.07	18.03		609.92	565.97	352.07	36.47	20	614.45	569.81	346.31
233	37.07	18.03		614.32	568.9	352.07	36.47	20	614.45	569.81	346.31
234	37.07	18.03		615.78	571.83	352.07	36.47	20	614.45	569.81	346.31
235	37.07	18.03		617.25	573.3	352.07	36.91	20.01	612.85	569.03	345.72
236	37.07	18.03		620.18	574.76	352.07	36.83	20.09	612.94	568.98	345.7
237	37.07	18.03		623.11	579.16	352.07	36.21	18.97	621.25	574.53	348.93
238	37.07	18.03		626.04	580.62	352.07	34.3	19.53	628.64	579.84	350.16
239	37.07	18.03		627.51	582.09	352.07	34.3	19.53	628.64	579.84	350.16
240	37.07	18.03		628.97	583.55	352.07	34.3	19.53	628.64	579.84	350.16
241	37.07	18.03		633.37	587.95	352.07	34.27	19.06	629.49	580.86	349.38
242	37.07	37.07		634.83	589.41	352.07	36.84	28.61	644.1	593.64	350.44
243	37.07	37.07		636.3	590.88	352.07	36.84	28.61	644.1	593.64	350.44
244	37.07	37.07		639.23	592.34	352.07	37.19	29.77	645.77	595.64	350.37
245	37.07	37.07		643.62	596.74	350.6	37.19	29.77	645.77	595.64	350.37
246	37.07	37.07		645.09	598.2	350.6	37.44	30.53	647.42	598.62	348.02
247	37.07	37.07		646.55	599.67	350.6	37.44	30.53	647.42	598.62	348.02
248	37.07	37.07		649.48	602.6	350.6	37.3	31.46	650.45	600.86	349.6
249	37.07	37.07		652.41	605.53	350.6	34.43	32.32	668.02	612.56	352.04
250	37.07	37.07		655.34	606.99	350.6	34.58	33.08	668.88	613.86	351.1
251	37.07	37.07		656.81	609.92	350.6	34.6	33.25	669.38	614.47	351
252	37.07	37.07		658.27	611.39	350.6	34.6	33.25	669.38	614.47	351
253	37.07	37.07		662.67	614.32	350.6	34.64	33.24	669.77	617.27	348.48
254	37.07	37.07		664.13	617.25	350.6	34.64	33.24	669.77	617.27	348.48
255	37.07	37.07		667.06	618.72	350.6	34.23	32.38	671.79	618.38	348.76
256	37.07	37.07		668.53	620.18	350.6	34.72	34.25	688.39	629.57	349.42
257	37.07	37.07		672.92	623.11	350.6	34.72	34.25	688.39	629.57	349.42
258	37.07	37.07		674.39	626.04	350.6	34.72	34.25	688.39	629.57	349.42
259	37.07	37.07		675.85	627.51	350.6	34.07	35.66	691.15	632.2	349.72
260	37.07	37.07		678.78	628.97	350.6	34.31	35.93	691.83	633.72	349.16
261	37.07	37.07		681.71	633.37	349.14	34.09	34.91	694.04	636.32	347.51
262	37.07	37.07		684.64	634.83	349.14	34.38	35.87	693.53	634.77	349.06
263	37.07	37.07		686.11	636.3	349.14	34.7	33.97	699.3	642.22	352.19
264	37.07	37.07		687.57	637.76	349.14	34.7	33.97	699.3	642.22	352.19
265	37.07	37.07		691.97	642.16	349.14	34.47	33.9	700.91	643.71	352.35
266	37.07	37.07		693.43	643.62	349.14	34.74	34.03	699.55	642.78	351.96
267	37.07	37.07		696.37	645.09	349.14	34.74	34.03	699.55	642.78	351.96
268	37.07	37.07		697.83	648.02	349.14	33.03	33.34	703.22	645.78	352.11
269	37.07	37.07		702.23	650.95	349.14	36.31	34.35	712.46	658.6	346.32
270	37.07	37.07		703.69	652.41	349.14	36.31	34.35	712.46	658.6	346.32
271	37.07	37.07		705.16	653.88	349.14	36.31	34.35	712.46	658.6	346.32
272	37.07	37.07		708.09	656.81	349.14	36.31	34.35	712.46	658.6	346.32
273	37.07	37.07		711.02	659.74	349.14	36.31	34.35	712.46	658.6	346.32
274	37.07	37.07		713.95	661.2	349.14	37.36	34.68	721.94	668.41	343.51
275	37.07	37.07		715.41	664.13	349.14	36.76	34.01	721.32	667.5	343.8
276	37.07	37.07		716.88	665.6	349.14	36.76	34.01	721.32	667.5	343.8
277	37.07	37.07		721.27	668.53	347.67	37.36	34.68	721.94	668.41	343.51
278	37.07	37.07		722.74	671.46	347.67	37.36	34.68	721.94	668.41	343.51
279	37.07	37.07		725.67	672.92	347.67	37.36	34.68	721.94	668.41	343.51
280	37.07	37.07		727.13	674.39	347.67	37.36	34.68	721.94	668.41	343.51
281	37.07	37.07		730.06	677.32	347.67	38.24	35.09	737.27	683.94	343.27
282	35.61	35.61		732.99	680.25	347.67	38.64	35.35	737.08	683.6	344.53
283	35.61	35.61		734.46	681.71	347.67	38.38	35.4	736.76	683.73	344.37
284	35.61	35.61		735.92	683.18	347.67	36.4	33.08	744.88	688.85	344.68
285	35.61	35.61		740.32	687.57	347.67	36.4	33.08	744.88	688.85	344.68
286	35.61	35.61		741.78	689.04	347.67	36.4	33.08	744.88	688.85	344.68
287	35.61	35.61		744.71	690.5	347.67	36.4	33.08	744.88	688.85	344.68
288	35.61	35.61		746.18	691.97	347.67	35.69	33.15	746.97	690.3	344.51
289	35.61	35.61		750.57	696.37	347.67	34.39	35.38	766.27	705.79	347.35
290	35.61	35.61		752.04	697.83	347.67	34.16	35.79	765.3	706.35	346.52
291	35.61	35.61		753.5	699.3	347.67	35.07	35.25	766.59	712.3	343.82
292	35.61	35.61		756.43	700.76	347.67	35.07	35.25	766.59	712.3	343.82
293	35.61	35.61		759.36	705.16	347.67	35.07	35.25	766.59	712.3	343.82
294	35.61	35.61		762.29	706.62	346.21	35.07	35.25	766.59	712.3	343.82
295	35.61	35.61		763.76	708.09	346.21	34.02	35.69	768.58	712.95	344.76
296	35.61	35.61		765.22	709.55	346.21	34.02	35.69	768.58	712.95	344.76
297	35.61	35.61		769.62	713.95	346.21	32.04	32.97	778	716.83	348.59
298	35.61	35.61		771.08	715.41	346.21	32.72	33.51	776.78	715.2	345.63
299	35.61	35.61		772.55	716.88	346.21	32.72	33.51	776.78	715.2	345.63
300	35.61	35.61		775.48	719.81	346.21	32.72	33.51	776.78	715.2	345.63
301	35.61	35.61		778.41	722.74	346.21	32.51	33.78	781.42	719.26	347.51
302	35.61	35.61		781.34	724.2	346.21	32.51	33.78	781.42	719.26	347.51
303	35.61	35.61		782.81	725.67	346.21	32.09	33.67	788.79	734.7	340.99
304	35.61	35.61		784.27	728.6	346.21	32.08	33.8	794.45	736.84	343.17
305	35.61	35.61		788.67	731.53	346.21	32.13	33.95	794.25	736.3	343.2
306	35.61	35.61		790.13	732.99	346.21	30.99	32.9	796.12	739.03	342.72
307	35.61	35.61		791.6	734.46	346.21	30.99	32.9	796.12	739.03	342.72
308	35.61	35.61		794.53	737.39	346.21	30.49	33.47	798.9	739.41	344.73
309	35.61	35.61		797.46	740.32	346.21	34.7	36.57	801.86	744.06	341.44
310	35.61	35.61		800.39	741.78	346.21	34.7	36.57	801.86	744.06	341.44
311	35.61	35.61		801.85	743.25	346.21	34.7	36.57	801.86	744.06	341.44
312	35.61	35.61		803.32	746.18	344.74	34.7	36.57	801.86	744.06	341.44
313	35.61	35.61		807.71	749.11	344.74	33.89	36.32	806.55	748.22	340.39
314	35.61	35.61		809.18	750.57	344.74	33.86	36.65	805.76	747.9	340.29
315	35.61	35.61		812.11	753.5	344.74	33.86	36.65	805.76	747.9	340.29
316	35.61	35.61		813.57	754.97	344.74	34.1	35.28	815.28	751.41	341.68
317	35.61	35.61		816.5	757.9	344.74	35.23	37.63	824.35	769.27	337.55
318	35.61	35.61		819.43	759.36	344.74	35.23	37.63	824.35	769.27	337.55
319	35.61	35.61		820.9	762.29	344.74	35.23	37.63	824.35	769.27	337.55
320	35.61	35.61		822.36	763.76	344.74	35.23	37.63	824.35	769.27	337.55
321	35.61	35.61		826.76	765.22	346.21	33.52	36.25	835.1	768.1	345.93
322	35.61	35.61		828.22	765.22	347.67	33.81	35.31	833.58	764.73	346.34
323	35.61	35.61		829.69	765.22	349.14	33.52	36.25	835.1	768.1	345.93
324	35.61	35.61		832.62	765.22	350.6	33.52	36.25	835.1	768.1	345.93
325	35.61	35.61		835.55	763.76	355	33.52	36.25	835.1	768.1	345.93
326	35.61	35.61		838.48	763.76	356.46	33.52	36.25	835.1	768.1	345.93
327	35.61	35.61		839.94	763.76	357.93	33.52	36.25	835.1	768.1	345.93
328	35.61	35.61		841.41	763.76	359.39	33.81	35.31	833.58	764.73	346.34
329	35.61	35.61		845.8	763.76	362.32	33.15	32.67	848.81	763.38	358.95
330	35.61	35.61		847.27	763.76	363.79	33.14	32.78	848.67	763.34	358.78
331	35.61	35.61		848.73	763.76	366.72	33.03	32.42	850.17	765.83	357.76
332	35.61	35.61		851.66	763.76	368.18	33.03	32.42	850.17	765.83	357.76
333	35.61	35.61		854.6	762.29	371.11	33.03	32.42	850.17	765.83	357.76
334	35.61	35.61		857.53	762.29	372.58	33.03	32.42	850.17	765.83	357.76
335	35.61	35.61		858.99	762.29	374.04	33.36	32.8	856.93	765.9	364.26
336	35.61	35.61		860.46	762.29	375.51	33.62	33.47	864.92	762.75	377.35
337	35.61	35.61		864.85	762.29	379.9	33.54	34.56	863.86	762.41	377.5
338	35.61	35.61		866.32	762.29	381.37	33.54	34.56	863.86	762.41	377.5
339	35.61	35.61		867.78	762.29	382.84	34.32	33.62	870.72	763.9	383.92
340	35.61	35.61		870.71	762.29	384.3	34.32	33.62	870.72	763.9	383.92
341	35.61	35.61		873.64	760.83	387.23	34.54	33.1	872.71	762.62	386.07
342	35.61	35.61		876.57	760.83	388.7	36.1	36.78	884.27	762.13	397.47
343	35.61	35.61		878.04	760.83	390.16	36.1	36.78	884.27	762.13	397.47
344	35.61	35.61		879.5	760.83	393.09	36.63	36.36	887.71	762.26	401.71
345	35.61	35.61		883.9	760.83	396.02	36.73	36.5	888.33	762.64	402.01
346	35.61	35.61		885.36	760.83	397.49	38.89	34.22	897.77	761.17	407.26
347	35.61	35.61		886.83	760.83	398.95	38.89	34.22	897.77	761.17	407.26
348	35.61	35.61		889.76	760.83	400.42	39.01	35.44	902.58	761.55	415.08
349	35.61	35.61		892.69	759.36	403.35	34.71	34.95	896.7	763.87	408.63
350	35.61	35.61		894.15	759.36	406.28	34.71	34.95	896.7	763.87	408.63
351	35.61	35.61		897.08	759.36	407.74	35.18	35.01	902.27	762.61	415.65
352	35.61	35.61		898.55	759.36	409.21	35.2	34.96	902.4	762.62	415.63
353	35.61	35.61		902.94	759.36	412.14	35.49	34.78	900.22	760.6	411.88
354	35.61	35.61		904.41	759.36	413.6	35.49	34.78	900.22	760.6	411.88
355	35.61	35.61		905.87	759.36	415.07	35.41	34.91	901.19	761.43	413.95
356	35.61	35.61		907.34	759.36	416.53	35.41	34.91	901.19	761.43	413.95
357	35.61	35.61		911.73	757.9	420.93	35.26	34.9	914.17	761.57	422.58
358	35.61	35.61		913.2	757.9	422.39	36.37	35.78	919.87	762.83	429.24
359	35.61	35.61		914.66	757.9	423.86	36.39	35.72	919.59	762.69	429.12
360	35.61	35.61		917.59	757.9	425.32	36.39	35.72	919.59	762.69	429.12
361	35.61	35.61		920.52	757.9	428.25	37.35	36.42	924.97	762.09	440.27
362	35.61	35.61		921.99	756.43	447.3	37.35	36.42	924.97	762.09	440.27
363	35.61	35.61		923.45	756.43	448.76	36.67	36.56	933.29	760.12	449.97
364	35.61	35.61		926.38	756.43	450.23	36.67	36.56	933.29	760.12	449.97
365	35.61	35.61		929.31	756.43	454.62	36.49	38.2	934.46	760.82	452.42
366	35.61	35.61		930.78	756.43	456.09	36.49	38.2	934.46	760.82	452.42
367	35.61	35.61		933.71	756.43	457.55	37.52	36.66	943.54	760.89	460.58
368	35.61	35.61		935.18	756.43	459.02	37.91	36.44	937.29	760.66	454.37
369	35.61	35.61		938.11	756.43	461.95	35.77	35.23	966.75	758.94	476.43
370	35.61	35.61		941.04	754.97	463.42	35.77	35.23	966.75	758.94	476.43
371	35.61	35.61		942.5	754.97	464.88	35.77	35.23	966.75	758.94	476.43
372	35.61	35.61		943.97	754.97	466.35	35.77	35.23	966.75	758.94	476.43
373	35.61	35.61		948.36	754.97	470.74	35.69	35.37	966.5	757.7	477.9
374	35.61	35.61		949.83	754.97	472.21	35.69	35.37	966.5	757.7	477.9
375	35.61	35.61		951.29	754.97	473.67	36.41	37.64	970.17	757.58	481.71
376	35.61	35.61		954.22	754.97	475.14	36.4	37.71	971.05	757.48	484.24
377	35.61	35.61		957.15	754.97	478.07	36.26	38.49	960.21	755.16	476.74
378	35.61	35.61		958.62	753.5	479.53	36.26	38.49	960.21	755.16	476.74
379	35.61	35.61		961.55	753.5	481	36.26	38.49	960.21	755.16	476.74
380	35.61	35.61		963.01	753.5	482.46	35.65	37.76	962.56	755.14	478.03
381	35.61	35.61		965.94	753.5	486.86	35.47	37.89	962.29	755.03	477.95
382	35.61	35.61		968.87	753.5	488.32	35.9	37.99	970.65	754.4	487.21
383	35.61	35.61		970.34	753.5	489.79	35.9	37.99	970.65	754.4	487.21
384	35.61	35.61		971.8	753.5	491.25	35.9	37.99	970.65	754.4	487.21
385	35.61	35.61		976.2	753.5	494.18	35.9	37.99	970.65	754.4	487.21
386	35.61	35.61		977.66	753.5	495.65	35.9	37.99	970.65	754.4	487.21
387	35.61	35.61		979.13	752.04	497.11	35.9	37.99	970.65	754.4	487.21
388	35.61	35.61		982.06	752.04	498.58	35.64	37.65	977.79	754.14	492.48
389	35.61	35.61		984.99	752.04	501.51	35.45	35.36	983.89	750.93	503.78
390	35.61	35.61		986.45	752.04	504.44	35.4	36.67	989.51	751.48	508.52
391	35.61	35.61		989.38	752.04	505.9	35.16	36.33	997.79	748.95	517.65
392	35.61	35.61		990.85	752.04	507.37	35.16	36.33	997.79	748.95	517.65
393	35.61	35.61		993.78	752.04	510.3	35.16	36.33	997.79	748.95	517.65
394	35.61	35.61		996.71	752.04	511.76	35.16	36.33	997.79	748.95	517.65
395	35.61	35.61		998.17	750.57	513.23	35.62	36.35	1002.14	750.24	519.6
396	35.61	35.61		999.64	750.57	514.69	36.18	34.05	1026.75	753.91	533.27
397	35.61	35.61		1004.03	750.57	517.62	35.14	33.55	1040.03	754.83	541.63
398	35.61	35.61		1005.5	750.57	519.09	34.79	34.31	1029.94	753.94	540.14
399	35.61	35.61		1006.96	750.57	522.02	34.79	34.31	1029.94	753.94	540.14
400	35.61	35.61		1008.43	750.57	523.48	34.79	34.31	1029.94	753.94	540.14
401	35.61	35.61		1012.83	750.57	526.41	34.16	33.59	1038.74	752.16	548.91
402	35.61	35.61		1014.29	750.57	527.88	35.08	35.66	1034.93	753.5	538.82
403	35.61	35.61		1015.76	750.57	529.34	35.08	35.66	1034.93	753.5	538.82
404	35.61	35.61		1018.69	749.11	530.81	35.6	36.02	1035.52	754.4	539.03
405	35.61	35.61		1021.62	749.11	533.74	35.37	36.05	1035.47	754.45	538.7
406	35.61	35.61		1023.08	749.11	535.2	34.61	35.68	1042.44	753.24	544.42
407	35.61	35.61		1026.01	749.11	536.67	34.61	35.68	1042.44	753.24	544.42
408	35.61	35.61		1027.48	749.11	539.6	34.89	35.87	1041.48	753.37	544.68
409	35.61	35.61		1030.41	749.11	542.53	37.64	34.27	1043.13	753	550.56
410	35.61	35.61		1033.34	749.11	544	37.64	34.27	1043.13	753	550.56
411	35.61	35.61		1034.8	749.11	545.46	37.85	34.42	1047.9	752.72	554.33
412	35.61	35.61		1036.27	747.64	546.93	37.85	34.42	1047.9	752.72	554.33
413	35.61	35.61		1040.66	747.64	549.86	38.05	33.69	1056.3	750.69	561.66
414	35.61	35.61		1042.13	747.64	551.32	38.05	33.69	1056.3	750.69	561.66
415	35.61	35.61		1043.59	747.64	552.79	37.98	33.92	1055.32	750.2	561.57
416	35.61	35.61		1045.06	747.64	554.25	35.23	35.22	1066.89	751.08	564.32
417	35.61	35.61		1049.45	747.64	557.18	35.23	35.22	1066.89	751.08	564.32
418	35.61	35.61		1050.92	747.64	560.11	34.62	35.42	1080.16	750.36	575.42
419	35.61	35.61		1052.38	747.64	561.58	35.05	35.61	1073.98	750.9	570.22
420	35.61	35.61		1055.31	747.64	563.04	35.05	35.61	1073.98	750.9	570.22
421	35.61	35.61		1058.24	746.18	565.97	35.06	34.63	1089.47	749.42	586.34
422	35.61	35.61		1059.71	746.18	567.44	33.88	33.83	1081.44	748.54	581.96
423	35.61	35.61		1062.64	746.18	568.9	33.88	33.83	1081.44	748.54	581.96
424	35.61	35.61		1064.1	746.18	570.37	33.88	33.83	1081.44	748.54	581.96
425	35.61	35.61		1067.03	746.18	573.3	33.88	33.83	1081.44	748.54	581.96
426	35.61	35.61		1068.5	746.18	574.76	34.26	33.39	1084.53	746.81	585.57
427	35.61	35.61		1071.43	746.18	576.23	34.16	33.53	1084.03	746.88	584.68
428	35.61	35.61		1072.89	746.18	577.69	34.16	33.53	1084.03	746.88	584.68
429	35.61	35.61		1075.82	744.71	582.09	34.31	34.05	1103.12	747.1	600.84
430	35.61	35.61		1078.75	744.71	583.55	34.7	33.63	1103.47	746.97	602.02
431	35.61	35.61		1080.22	744.71	585.02	34.7	33.63	1103.47	746.97	602.02
432	35.61	35.61		1081.68	744.71	586.48	34.7	33.63	1103.47	746.97	602.02
433	35.61	35.61		1086.08	744.71	589.41	34.7	33.63	1103.47	746.97	602.02
434	35.61	35.61		1087.54	744.71	590.88	34.7	33.63	1103.47	746.97	602.02
435	35.61	35.61		1089.01	744.71	592.34	34.31	34.05	1103.12	747.1	600.84
436	35.61	35.61		1090.48	744.71	593.81	33.16	32.63	1107.01	744.74	604.7
437	35.61	35.61		1094.87	743.25	596.74	34.68	34.52	1102.06	742.81	599.33
438	35.61	35.61		1096.34	743.25	598.2	34.68	34.52	1102.06	742.81	599.33
439	35.61	35.61		1097.8	743.25	599.67	34.68	34.52	1102.06	742.81	599.33
440	35.61	35.61		1099.27	743.25	602.6	34.68	34.52	1102.06	742.81	599.33
441	35.61	35.61		1103.66	743.25	605.53	34.49	33.8	1108.63	742.28	605.09
442	35.61	35.61		1105.13	743.25	606.99	35.5	35.81	1120.09	745.77	624.61
443	35.61	35.61		1106.59	743.25	608.46	36.03	35.32	1122.04	746.91	624.38
444	35.61	35.61		1109.52	743.25	609.92	35.67	35.19	1124.62	746.7	626.46
445	35.61	35.61		1112.45	743.25	612.85	34.14	34.59	1131.85	742.89	633.16
446	35.61	35.61		1113.92	741.78	614.32	34.14	34.59	1131.85	742.89	633.16
447	35.61	35.61		1115.38	741.78	615.78	34.14	34.59	1131.85	742.89	633.16
448	35.61	35.61		1118.31	741.78	617.25	33.44	34.6	1135.42	742.51	635.97
449	35.61	35.61		1121.24	741.78	620.18	32.37	33.81	1143.61	739.48	638.39
450	35.61	35.61		1122.71	741.78	621.65	32.52	33.71	1148.26	739.09	643.19
451	35.61	35.61		1125.64	741.78	623.11	32.69	33.55	1147.3	738.67	643.09
452	34.14	34.14		1127.1	741.78	624.58	32.69	33.55	1147.3	738.67	643.09
453	34.14	34.14		1130.03	741.78	628.97	31.11	34.01	1157.64	740.72	655.91
454	34.14	34.14		1131.5	740.32	630.44	31.11	34.01	1157.64	740.72	655.91
455	34.14	34.14		1134.43	740.32	631.9	31.29	34.43	1157.36	741.69	656.97
456	34.14	34.14		1135.89	740.32	633.37	31.9	31.59	1165.27	743.54	652.74
457	34.14	34.14		1138.82	740.32	636.3	31.9	31.59	1165.27	743.54	652.74
458	34.14	34.14		1141.75	740.32	637.76	31.25	31.11	1169.41	742.24	657.72
459	34.14	34.14		1143.22	740.32	639.23	31.4	31.11	1170.76	741.65	661.52
460	34.14	34.14		1144.68	740.32	640.69	31.4	31.11	1170.76	741.65	661.52
461	34.14	34.14		1147.61	740.32	643.62	30.76	32.83	1172.14	741.35	660.56
462	34.14	34.14		1150.54	740.32	645.09	30.71	32.78	1171.56	741.5	659.71
463	34.14	34.14		1152.01	738.85	646.55	30.83	30.77	1179.09	739.85	669.17
464	34.14	34.14		1153.47	738.85	648.02	30.83	30.77	1179.09	739.85	669.17
465	34.14	34.14		1157.87	738.85	650.95	30.83	30.77	1179.09	739.85	669.17
466	34.14	34.14		1159.33	738.85	653.88	31.05	30.98	1184.77	738.26	673.84
467	34.14	34.14		1160.8	738.85	655.34	30.96	31.02	1184.21	738.34	672.62
468	34.14	34.14		1162.26	738.85	656.81	31	31.02	1184.17	738.3	672.28
469	34.14	34.14		1166.66	738.85	659.74	30.05	30.97	1188.43	734.58	676.34
470	34.14	34.14		1168.13	738.85	661.2	30.05	30.97	1188.43	734.58	676.34
471	34.14	34.14		1169.59	738.85	662.67	30.05	30.97	1188.43	734.58	676.34
472	34.14	34.14		1171.06	737.39	664.13	30.05	30.97	1188.43	734.58	676.34
473	34.14	34.14		1175.45	737.39	667.06	30.64	31.01	1189.95	733.72	684.45
474	34.14	34.14		1176.92	737.39	668.53	30.6	31.15	1191.62	733.47	686.7
475	34.14	34.14		1178.38	737.39	669.99	30.6	31.15	1191.62	733.47	686.7
476	34.14	34.14		1179.85	737.39	671.46	30.05	32.26	1190.89	732.85	684.46
477	34.14	34.14		1184.24	737.39	674.39	28.78	31.32	1208.11	732.12	695.06
478	34.14	34.14		1185.71	737.39	675.85	28.78	31.32	1208.11	732.12	695.06
479	34.14	34.14		1187.17	737.39	677.32	28.78	31.32	1208.11	732.12	695.06
480	34.14	34.14		1188.64	737.39	678.78	28.78	31.32	1208.11	732.12	695.06
481	34.14	34.14		1190.1	735.92	683.18	29.77	32.22	1215.54	733.87	698.5
482	34.14	34.14		1207.68	735.92	683.18	29.52	32.52	1214.74	733.75	698.11
483	34.14	34.14		1206.22	735.92	684.64	29.77	32.22	1215.54	733.87	698.5
484	34.14	34.14		1206.22	735.92	686.11	29.77	32.22	1215.54	733.87	698.5
485	34.14	34.14		1206.22	735.92	690.5	29.77	32.22	1215.54	733.87	698.5
486	34.14	34.14		1206.22	735.92	691.97	29.77	32.22	1215.54	733.87	698.5
487	34.14	34.14		1206.22	735.92	693.43	29.77	32.22	1215.54	733.87	698.5
488	34.14	34.14		1206.22	735.92	694.9	29.52	32.52	1214.74	733.75	698.11
489	34.14	34.14		1206.22	735.92	697.83	28.94	33.27	1213.96	733.52	713.72
490	34.14	34.14		1206.22	735.92	699.3	28.94	33.19	1213.94	733.38	713.6
491	34.14	34.14		1206.22	734.46	700.76	28.12	32.44	1214.35	731.84	713.95
492	34.14	34.14		1206.22	734.46	702.23	28.12	32.44	1214.35	731.84	713.95
493	34.14	34.14		1206.22	734.46	706.62	28.12	32.44	1214.35	731.84	713.95
494	34.14	34.14		1204.75	734.46	708.09	28.12	32.44	1214.35	731.84	713.95
495	34.14	34.14		1204.75	734.46	709.55	28.26	33.55	1216.82	732.29	717.12
496	34.14	34.14		1204.75	734.46	711.02	29.12	33.9	1216.47	730.87	721.45
497	34.14	34.14		1204.75	734.46	713.95	29.74	35.07	1218.27	731.79	724.3
498	34.14	34.14		1204.75	734.46	715.41	30.62	32.74	1217.03	729.96	728.45
499	34.14	34.14		1204.75	734.46	716.88	30.62	32.74	1217.03	729.96	728.45
500	34.14	34.14		1204.75	734.46	718.34	30.62	32.74	1217.03	729.96	728.45
501	34.14	34.14		1204.75	734.46	721.27	30.36	33.68	1219.21	730.85	732.9
502	34.14	34.14		1204.75	734.46	722.74	30.27	33.76	1219.35	730.97	733.03
503	34.14	34.14		1204.75	734.46	725.67	29.13	34.99	1216.43	727.47	728.96
504	34.14	34.14		1204.75	734.46	727.13	29.13	34.99	1216.43	727.47	728.96
505	34.14	34.14		1204.75	734.46	730.06	29.58	35.45	1216.29	727.01	739.78
506	34.14	34.14		1203.29	734.46	731.53	28.76	35.66	1214.42	728.05	740.29
507	34.14	34.14		1203.29	734.46	732.99	28.76	35.66	1214.42	728.05	740.29
508	34.14	34.14		1203.29	734.46	734.46	29.23	35.46	1214.61	728.15	745
509	34.14	34.14		1203.29	734.46	737.39	29.25	35.56	1214.79	728.16	744.97
510	34.14	34.14		1203.29	732.99	738.85	30.56	34.91	1214.46	728.16	746.93
511	34.14	34.14		1203.29	732.99	740.32	30.87	33.42	1211.73	727.33	743.39
512	34.14	34.14		1203.29	732.99	743.25	30.88	33.4	1211.74	727.29	743.38
513	34.14	34.14		1203.29	732.99	746.18	30.49	35.03	1218.26	729.87	756.03
514	34.14	34.14		1203.29	732.99	747.64	30.49	35.03	1218.26	729.87	756.03
515	34.14	34.14		1203.29	732.99	749.11	30.76	34.43	1216.11	729.22	755.02
516	34.14	34.14		1203.29	732.99	750.57	30.6	35.7	1215.16	729.1	766.59
517	34.14	34.14		1203.29	732.99	753.5	30.6	35.7	1215.16	729.1	766.59
518	34.14	34.14		1201.82	732.99	754.97	30.6	35.7	1215.16	729.1	766.59
519	34.14	34.14		1201.82	732.99	756.43	31.26	34.7	1213	728.94	761.86
520	34.14	34.14		1201.82	732.99	757.9	31.22	34.64	1213.13	729.06	762.48
521	34.14	34.14		1201.82	732.99	762.29	31.12	33.41	1213.95	728.38	762.17
522	34.14	34.14		1201.82	732.99	763.76	32.21	34.27	1210.83	728.99	773.37
523	34.14	34.14		1201.82	732.99	765.22	32.21	34.27	1210.83	728.99	773.37
524	34.14	34.14		1201.82	732.99	766.69	32.21	34.27	1210.83	728.99	773.37
525	34.14	34.14		1201.82	732.99	769.62	32.21	34.27	1210.83	728.99	773.37
526	34.14	34.14		1201.82	732.99	771.08	32.21	34.27	1210.83	728.99	773.37
527	34.14	34.14		1201.82	732.99	772.55	31.96	34.59	1210.63	730.03	774.5
528	34.14	34.14		1201.82	732.99	774.02	32.16	34.56	1210.75	729.8	774.81
529	34.14	34.14		1201.82	731.53	776.95	31.62	33.92	1208.48	729.49	788.19
530	34.14	34.14		1200.36	731.53	778.41	31.52	35.21	1208.57	731.37	792.22
531	34.14	34.14		1200.36	731.53	781.34	31.52	35.21	1208.57	731.37	792.22
532	34.14	34.14		1200.36	731.53	782.81	31.52	35.21	1208.57	731.37	792.22
533	34.14	34.14		1200.36	731.53	785.74	31.22	34.86	1208.04	730.51	800.81
534	34.14	34.14		1200.36	731.53	787.2	31.22	34.86	1208.04	730.51	800.81
535	34.14	34.14		1200.36	731.53	788.67	31.18	33.15	1207.16	731.23	799.87
536	34.14	34.14		1200.36	731.53	790.13	31.55	33.62	1207.52	731.05	798.27
537	34.14	34.14		1200.36	731.53	793.06	31.18	33.15	1207.16	731.23	799.87
538	34.14	34.14		1200.36	731.53	794.53	31.18	33.15	1207.16	731.23	799.87
539	34.14	34.14		1200.36	731.53	795.99	31.18	33.15	1207.16	731.23	799.87
540	34.14	34.14		1200.36	731.53	797.46	31.18	33.15	1207.16	731.23	799.87
541	34.14	34.14		1198.89	731.53	801.85	31.55	33.62	1207.52	731.05	798.27
542	34.14	34.14		1198.89	731.53	803.32	31.55	33.62	1207.52	731.05	798.27
543	34.14	34.14		1198.89	731.53	804.78	29.83	33.95	1209.24	732.33	817.23
544	34.14	34.14		1198.89	731.53	806.25	30.17	33.3	1208.92	730.83	819.96
545	34.14	34.14		1198.89	731.53	809.18	30.36	33.25	1206.63	731.77	823.43
546	34.14	34.14		1198.89	731.53	810.64	30.36	33.25	1206.63	731.77	823.43
547	34.14	34.14		1198.89	731.53	812.11	30.36	33.25	1206.63	731.77	823.43
548	34.14	34.14		1198.89	731.53	813.57	30.01	33.81	1206.47	730.53	819.51
549	34.14	34.14		1198.89	730.06	816.5	31.32	34.67	1204.41	731.61	829.38
550	34.14	34.14		1198.89	730.06	817.97	31.32	34.67	1204.41	731.61	829.38
551	34.14	34.14		1198.89	730.06	820.9	31.32	34.67	1204.41	731.61	829.38
552	34.14	34.14		1198.89	730.06	822.36	31.63	35.41	1205.27	729.59	824.57
553	34.14	34.14		1197.43	730.06	825.29	32.05	33.73	1201.87	731.75	835.1
554	34.14	34.14		1197.43	730.06	826.76	32.05	33.73	1201.87	731.75	835.1
555	34.14	34.14		1197.43	730.06	828.22	32.15	34.85	1202.76	733.13	839.74
556	34.14	34.14		1197.43	730.06	829.69	32.15	34.85	1202.76	733.13	839.74
557	34.14	34.14		1197.43	730.06	832.62	30.1	35.56	1200.5	730.51	842.3
558	34.14	34.14		1197.43	730.06	834.08	30.1	35.56	1200.5	730.51	842.3
559	34.14	34.14		1197.43	730.06	835.55	30.1	35.56	1200.5	730.51	842.3
560	34.14	34.14		1197.43	730.06	837.01	30.1	35.41	1201.44	733.58	846.41
561	34.14	34.14		1197.43	730.06	841.41	30.04	35.44	1201.56	733.42	846.15
562	34.14	34.14		1197.43	730.06	842.87	30.41	35.92	1203.35	732.79	848.56
563	34.14	34.14		1197.43	730.06	844.34	30.48	33.97	1201	730.59	865.29
564	34.14	34.14		1197.43	730.06	845.8	30.48	33.97	1201	730.59	865.29
565	34.14	34.14		1195.96	730.06	848.73	30.48	33.97	1201	730.59	865.29
566	34.14	34.14		1195.96	730.06	850.2	30.48	33.97	1201	730.59	865.29
567	34.14	34.14		1195.96	730.06	851.66	30.48	33.97	1201	730.59	865.29
568	34.14	34.14		1195.96	730.06	853.13	30.32	34	1202.37	733.28	867.81
569	34.14	34.14		1195.96	728.6	856.06	31.07	34.83	1202.33	724.63	869.03
570	34.14	34.14		1195.96	728.6	857.53	31.07	34.83	1202.33	724.63	869.03
571	34.14	34.14		1195.96	728.6	858.99	31.07	34.83	1202.33	724.63	869.03
572	34.14	34.14		1195.96	728.6	860.46	31.07	34.83	1202.33	724.63	869.03
573	34.14	34.14		1195.96	728.6	864.85	31.07	34.83	1202.33	724.63	869.03
574	34.14	34.14		1195.96	728.6	866.32	31.42	34.74	1200.32	726.44	874.27
575	34.14	34.14		1195.96	728.6	867.78	31.35	34.66	1200.19	726.19	873.07
576	34.14	34.14		1195.96	728.6	869.25	31.31	35.21	1202.4	726.53	883.1
577	34.14	34.14		1194.5	728.6	872.18	31.55	35.95	1203.39	725.43	877.12
578	34.14	34.14		1194.5	728.6	873.64	31.55	35.95	1203.39	725.43	877.12
579	34.14	34.14		1194.5	728.6	875.11	31.55	35.95	1203.39	725.43	877.12
580	34.14	34.14		1194.5	728.6	876.57	31.55	35.95	1203.39	725.43	877.12
581	34.14	34.14		1194.5	728.6	879.5	31.31	35.21	1202.4	726.53	883.1
582	34.14	34.14		1194.5	728.6	880.97	31.31	35.21	1202.4	726.53	883.1
583	34.14	34.14		1194.5	728.6	882.43	31.38	36.09	1200.58	728.31	898.27
584	34.14	34.14		1194.5	728.6	885.36	31.19	35.75	1200.83	726.5	894.24
585	34.14	34.14		1194.5	728.6	888.29	31.98	35.97	1199.25	732.62	898.14
586	34.14	34.14		1194.5	728.6	889.76	31.98	35.97	1199.25	732.62	898.14
587	34.14	34.14		1194.5	728.6	891.22	31.98	35.97	1199.25	732.62	898.14
588	34.14	34.14		1194.5	728.6	892.69	31.64	35.73	1198.86	733.08	897.77
589	34.14	34.14		1193.03	727.13	895.62	32.88	34.82	1197.1	724.2	917.87
590	34.14	34.14		1193.03	727.13	897.08	32.38	34.98	1196.99	722.74	916.02
591	34.14	34.14		1193.03	727.13	898.55	32.44	35.01	1196.71	722.87	917.26
592	34.14	34.14		1193.03	727.13	900.01	31.82	34.66	1196.04	724.52	906.19
593	34.14	34.14		1193.03	727.13	902.94	31.82	34.66	1196.04	724.52	906.19
594	34.14	34.14		1193.03	727.13	904.41	31.82	34.66	1196.04	724.52	906.19
595	34.14	34.14		1193.03	727.13	907.34	31.77	34.47	1196.5	723.75	908.44
596	34.14	34.14		1193.03	727.13	908.8	31.43	33.79	1198.02	726.42	915.49
597	34.14	34.14		1193.03	727.13	911.73	31.05	33.72	1199.4	725.56	911.97
598	34.14	34.14		1193.03	727.13	913.2	30.43	34.34	1198.5	727.77	923.74
599	34.14	34.14		1193.03	727.13	914.66	30.43	34.34	1198.5	727.77	923.74
600	34.14	34.14		1193.03	727.13	916.13	30.43	34.34	1198.5	727.77	923.74
601	34.14	34.14		1191.57	727.13	919.06	30.22	34.25	1197.74	728.9	922.51
602	34.14	34.14		1191.57	743.25	920.52	30.22	34.25	1197.74	728.9	922.51
603	34.14	34.14		1191.57	743.25	921.99	30.96	35.24	1196.14	737.93	937.98
604	34.14	34.14		1191.57	743.25	923.45	30.96	35.24	1196.14	737.93	937.98
605	34.14	34.14		1190.1	743.25	926.38	30.84	34.89	1194.29	740.8	950.92
606	34.14	34.14		1190.1	743.25	927.85	30.88	35.16	1194.59	739.34	948.32
607	34.14	34.14		1190.1	743.25	929.31	30.91	35.32	1195.54	741.03	942.23
608	34.14	34.14		1190.1	743.25	930.78	30.68	35.75	1194.19	743.46	952.57
609	34.14	34.14		1190.1	743.25	933.71	30.98	34.66	1196.88	741.31	958.23
610	34.14	34.14		1190.1	743.25	935.18	30.98	34.66	1196.88	741.31	958.23
611	34.14	34.14		1190.1	743.25	936.64	30.98	34.66	1196.88	741.31	958.23
612	34.14	34.14		1190.1	743.25	938.11	30.32	35.21	1198.89	745.4	964.33
613	34.14	34.14		1190.1	741.78	941.04	30.41	35.8	1198.01	740.76	956.25
614	34.14	34.14		1190.1	741.78	943.97	30.41	35.8	1198.01	740.76	956.25
615	34.14	34.14		1190.1	741.78	945.43	30.66	35.45	1196.89	748.01	971.74
616	34.14	34.14		1190.1	741.78	946.9	30.66	35.45	1196.89	748.01	971.74
617	34.14	34.14		1188.64	741.78	949.83	31.35	34.78	1197.75	738.36	958.83
618	34.14	34.14		1188.64	741.78	951.29	31.35	34.78	1197.75	738.36	958.83
619	34.14	34.14		1188.64	741.78	952.76	31.35	34.78	1197.75	738.36	958.83
620	34.14	34.14		1188.64	741.78	954.22	31.61	35.14	1198.4	737.35	956.12
621	34.14	34.14		1188.64	741.78	957.15	30.78	35.29	1197.59	743.95	965.6
622	34.14	34.14		1188.64	741.78	958.62	30.64	34.25	1197.31	745.07	971.57
623	34.14	34.14		1188.64	741.78	960.08	30.61	33.29	1195.69	742.3	980.52
624	34.14	34.14		1188.64	741.78	961.55	30.61	33.29	1195.69	742.3	980.52
625	34.14	34.14		1188.64	741.78	964.48	30.61	33.29	1195.69	742.3	980.52
626	34.14	34.14		1188.64	741.78	965.94	30.61	33.29	1195.69	742.3	980.52
627	34.14	34.14		1188.64	741.78	967.41	30.34	33.01	1195.33	745.36	984.95
628	34.14	34.14		1188.64	741.78	970.34	30.3	33.18	1195.56	745.39	985.04
629	34.14	34.14		1187.17	741.78	973.27	30.39	31.76	1194.07	747.8	987.25
630	34.14	34.14		1187.17	741.78	974.73	30.71	34.05	1194.28	739.61	994.95
631	34.14	34.14		1187.17	741.78	976.2	30.71	34.05	1194.28	739.61	994.95
632	34.14	34.14		1187.17	740.32	977.66	30.71	34.05	1194.28	739.61	994.95
633	34.14	34.14		1187.17	740.32	980.59	30.46	33.76	1193.93	744.16	999.23
634	34.14	34.14		1187.17	740.32	982.06	30.44	33.66	1194.16	742.95	997.92
635	34.14	34.14		1187.17	740.32	983.52	30.16	34.06	1194.46	745.79	1002.29
636	34.14	34.14		1187.17	740.32	984.99	30.4	34.28	1194.89	742.92	1000.74
637	34.14	34.14		1187.17	740.32	987.92	30.26	33.52	1195.51	742.57	1004.5
638	34.14	34.14		1187.17	740.32	989.38	30.26	33.52	1195.51	742.57	1004.5
639	34.14	34.14		1187.17	740.32	990.85	30.26	33.52	1195.51	742.57	1004.5
640	34.14	34.14		1187.17	740.32	992.31	30.26	33.52	1195.51	742.57	1004.5
641	34.14	34.14		1185.71	741.78	995.24	29.97	35.02	1191.88	751.39	1012.07
642	34.14	34.14		1185.71	743.25	996.71	30.02	34.64	1192.82	750.57	1009.75
643	34.14	34.14		1185.71	744.71	998.17	29.97	35.02	1191.88	751.39	1012.07
644	34.14	34.14		1185.71	747.64	999.64	29.97	35.02	1191.88	751.39	1012.07
645	34.14	34.14		1185.71	750.57	1002.57	29.97	35.02	1191.88	751.39	1012.07
646	34.14	34.14		1185.71	752.04	1004.03	29.97	35.02	1191.88	751.39	1012.07
647	34.14	34.14		1184.24	753.5	1005.5	29.97	35.02	1191.88	751.39	1012.07
648	34.14	34.14		1184.24	754.97	1006.96	29.94	32.75	1189.93	755.76	1015.22
649	34.14	34.14		1184.24	759.36	1009.89	30.2	33.11	1187.22	765.81	1024.99
650	34.14	34.14		1184.24	760.83	1011.36	30.2	33.11	1187.22	765.81	1024.99
651	34.14	34.14		1184.24	762.29	1012.83	29.74	33.3	1187.39	771.19	1030.87
652	34.14	34.14		1184.24	763.76	1014.29	29.74	33.3	1187.39	771.19	1030.87
653	34.14	34.14		1182.78	766.69	1017.22	29.74	33.3	1187.39	771.19	1030.87
654	34.14	34.14		1182.78	768.15	1018.69	29.74	33.3	1187.39	771.19	1030.87
655	34.14	34.14		1182.78	771.08	1020.15	30.11	32.92	1185.28	776.93	1037.73
656	34.14	34.14		1182.78	772.55	1021.62	29.91	33.19	1185.18	780.99	1042.32
657	34.14	34.14		1182.78	775.48	1024.55	29.93	34.29	1187.43	775.37	1034.9
658	34.14	34.14		1181.31	776.95	1026.01	29.99	32.26	1186.46	780.47	1039.01
659	34.14	34.14		1181.31	778.41	1027.48	29.99	32.26	1186.46	780.47	1039.01
660	34.14	34.14		1181.31	779.88	1028.94	29.99	32.26	1186.46	780.47	1039.01
661	34.14	34.14		1181.31	784.27	1031.87	30.22	32.5	1187.92	777.36	1034.5
662	34.14	34.14		1181.31	785.74	1033.34	30.22	32.5	1187.92	777.36	1034.5
663	34.14	34.14		1181.31	787.2	1034.8	28.4	33.66	1182.78	814.76	1060.11
664	34.14	34.14		1181.31	788.67	1036.27	28.4	33.66	1182.78	814.76	1060.11
665	34.14	34.14		1179.85	791.6	1039.2	28.29	33.44	1182.5	818.79	1063.01
666	34.14	34.14		1179.85	794.53	1040.66	28.47	34.04	1182.54	811.76	1058.54
667	34.14	34.14		1179.85	795.99	1042.13	28.47	34.04	1182.54	811.76	1058.54
668	34.14	34.14		1179.85	797.46	1043.59	28.88	34.41	1185.62	803.89	1047.61
669	34.14	34.14		1179.85	800.39	1046.52	29.8	35.1	1181.75	803.44	1055
670	34.14	34.14		1178.38	801.85	1047.99	29.8	35.1	1181.75	803.44	1055
671	34.14	34.14		1178.38	803.32	1049.45	29.8	35.1	1181.75	803.44	1055
672	34.14	34.14		1178.38	804.78	1050.92	29.2	35.36	1180.37	807.17	1060.59
673	34.14	34.14		1178.38	809.18	1053.85	30.02	36.09	1182.61	810.61	1061.24
674	34.14	34.14		1178.38	810.64	1055.31	30.02	36.09	1182.61	810.61	1061.24
675	34.14	34.14		1178.38	812.11	1056.78	29.94	35.43	1183.01	807.81	1060.04
676	34.14	34.14		1176.92	813.57	1058.24	29.94	35.43	1183.01	807.81	1060.04
677	34.14	34.14		1176.92	816.5	1061.17	30.76	34.16	1176.73	820.79	1068.94
678	34.14	34.14		1176.92	819.43	1062.64	30.76	34.16	1176.73	820.79	1068.94
679	34.14	34.14		1176.92	820.9	1064.1	30.76	34.16	1176.73	820.79	1068.94
680	34.14	34.14		1176.92	822.36	1065.57	31.18	33.47	1177.51	815.94	1064.47
681	34.14	34.14		1175.45	825.29	1068.5	31.13	33.34	1177.56	815.74	1064.36
682	34.14	34.14		1175.45	826.76	1069.96	30.5	33.45	1177.01	827.62	1074.67
683	34.14	34.14		1175.45	828.22	1071.43	30.49	36.42	1179.03	834.48	1083.04
684	34.14	34.14		1175.45	829.69	1072.89	30.49	36.42	1179.03	834.48	1083.04
685	34.14	34.14		1175.45	834.08	1075.82	30.49	36.42	1179.03	834.48	1083.04
686	34.14	34.14		1175.45	835.55	1077.29	30.49	36.42	1179.03	834.48	1083.04
687	34.14	34.14		1175.45	837.01	1078.75	30.66	36.99	1179.43	838.19	1087.48
688	34.14	34.14		1173.99	838.48	1080.22	30.71	36.97	1179.58	837.55	1086.39
689	34.14	34.14		1173.99	841.41	1083.15	32.19	35.4	1182.43	836.11	1080.03
690	34.14	34.14		1173.99	842.87	1084.61	30.34	34.37	1179.72	842.91	1084.99
691	34.14	34.14		1173.99	845.8	1086.08	30.34	34.37	1179.72	842.91	1084.99
692	34.14	34.14		1173.99	847.27	1086.08	30.34	34.37	1179.72	842.91	1084.99
693	34.14	34.14		1172.52	850.2	1089.01	30.34	34.37	1179.72	842.91	1084.99
694	34.14	34.14		1172.52	851.66	1090.48	30.34	34.37	1179.72	842.91	1084.99
695	34.14	34.14		1172.52	853.13	1091.94	29.9	34.01	1178.06	847.85	1091.14
696	34.14	34.14		1172.52	854.6	1093.41	29.9	34.01	1178.06	847.85	1091.14
697	34.14	34.14		1172.52	858.99	1096.34	29.76	34.82	1177.03	863.65	1107.7
698	34.14	34.14		1172.52	860.46	1097.8	29.76	34.82	1177.03	863.65	1107.7
699	34.14	34.14		1171.06	861.92	1099.27	29.76	34.82	1177.03	863.65	1107.7
700	34.14	34.14		1171.06	863.39	1100.73	29.76	34.82	1177.03	863.65	1107.7
701	34.14	34.14		1171.06	866.32	1103.66	29.76	32.92	1176.18	872.89	1117.01
702	34.14	34.14		1171.06	867.78	1105.13	29.48	33.18	1176.76	874.26	1116.93
703	34.14	34.14		1171.06	869.25	1106.59	29.76	32.92	1176.18	872.89	1117.01
704	34.14	34.14		1171.06	870.71	1108.06	29.76	32.92	1176.18	872.89	1117.01
705	34.14	34.14		1169.59	875.11	1110.99	29.76	32.92	1176.18	872.89	1117.01
706	34.14	34.14		1169.59	876.57	1112.45	29.76	32.92	1176.18	872.89	1117.01
707	34.14	34.14		1169.59	878.04	1113.92	29.76	32.92	1176.18	872.89	1117.01
708	34.14	34.14		1169.59	879.5	1115.38	29.48	33.18	1176.76	874.26	1116.93
709	34.14	34.14		1169.59	882.43	1118.31	29.37	30.9	1174.39	881.73	1125.21
710	34.14	34.14		1169.59	883.9	1119.78	29.31	29.75	1173.9	892.96	1134.48
711	34.14	34.14		1168.13	885.36	1121.24	29.36	29.72	1173.94	892.56	1134.02
712	34.14	34.14		1168.13	888.29	1122.71	29.23	29.92	1172.58	893.09	1134.71
713	34.14	34.14		1168.13	891.22	1125.64	29.23	29.92	1172.58	893.09	1134.71
714	34.14	34.14		1168.13	892.69	1127.1	29.23	29.92	1172.58	893.09	1134.71
715	34.14	34.14		1168.13	894.15	1128.57	28.86	29.78	1171.64	897.97	1140.4
716	34.14	34.14		1168.13	895.62	1130.03	29.01	31.44	1168.97	892.66	1137.21
717	34.14	34.14		1166.66	898.55	1131.5	29.62	31.28	1168.28	894.7	1139.48
718	34.14	34.14		1166.66	900.01	1132.96	29.64	30.05	1169.44	903.81	1146.91
719	34.14	34.14		1166.66	902.94	1134.43	29.64	30.05	1169.44	903.81	1146.91
720	34.14	34.14		1166.66	904.41	1135.89	29.64	30.05	1169.44	903.81	1146.91
721	34.14	34.14		1166.66	907.34	1138.82	29.66	29.94	1169.77	906.75	1149.46
722	32.68	32.68		1165.19	908.8	1156.4	29.66	29.94	1169.77	906.75	1149.46
723	32.68	32.68		1165.19	910.27	1157.87	27.3	30.09	1168.39	903.06	1155.27
724	32.68	32.68		1165.19	911.73	1159.33	28.15	30.78	1168.61	908.05	1158.27
725	32.68	32.68		1163.73	914.66	1162.26	27.63	30.69	1170.09	909.54	1159.93
726	32.68	32.68		1163.73	916.13	1163.73	27.63	30.69	1170.09	909.54	1159.93
727	32.68	32.68		1163.73	917.59	1165.19	27.63	30.69	1170.09	909.54	1159.93
728	32.68	32.68		1163.73	919.06	1166.66	27.15	30.49	1169.43	913.9	1164.05
729	32.68	32.68		1163.73	921.99	1169.59	27.15	30.49	1169.43	913.9	1164.05
730	32.68	32.68		1163.73	924.92	1171.06	28.26	30.99	1167.92	935.82	1184.32
731	32.68	32.68		1162.26	926.38	1172.52	28.26	30.99	1167.92	935.82	1184.32
732	32.68	32.68		1162.26	927.85	1172.52	28.59	29.76	1166.88	940.56	1188.46
733	32.68	32.68		1162.26	930.78	1175.45	28.78	29.9	1166.15	948.79	1195.75
734	32.68	32.68		1162.26	932.25	1176.92	28.78	29.9	1166.15	948.79	1195.75
735	32.68	32.68		1162.26	933.71	1178.38	28.87	30.34	1166.11	946.76	1194.14
736	32.68	32.68		1162.26	935.18	1179.85	28.87	30.34	1166.11	946.76	1194.14
737	32.68	32.68		1160.8	938.11	1182.78	27.9	29.43	1165.62	935.17	1181.51
738	32.68	32.68		1160.8	941.04	1184.24	27.67	30.1	1164.91	937.89	1183.8
739	32.68	32.68		1160.8	942.5	1185.71	27.57	29.93	1164.98	938.41	1184.4
740	32.68	32.68		1160.8	943.97	1187.17	27.57	29.93	1164.98	938.41	1184.4
741	32.68	32.68		1160.8	946.9	1190.1	28	30.29	1164.41	939.25	1185.97
742	32.68	32.68		1160.8	948.36	1191.57	28	30.29	1164.41	939.25	1185.97
743	32.68	32.68		1159.33	949.83	1193.03	25.67	29.94	1161.86	945.18	1186.97
744	32.68	32.68		1159.33	951.29	1194.5	25.67	29.94	1161.86	945.18	1186.97
745	32.68	32.68		1159.33	954.22	1197.43	25.67	29.94	1161.86	945.18	1186.97
746	32.68	32.68		1159.33	957.15	1198.89	26.44	29.61	1162.69	954.01	1193
747	32.68	32.68		1159.33	958.62	1200.36	26.42	29.58	1162.75	954.39	1193.37
748	32.68	32.68		1159.33	960.08	1201.82	26.42	29.58	1162.75	954.39	1193.37
749	32.68	32.68		1157.87	963.01	1203.29	25.37	29.88	1166.27	954.03	1192.59
750	32.68	32.68		1157.87	964.48	1204.75	30.78	31.55	1163.27	966.27	1208.7
751	32.68	32.68		1157.87	965.94	1206.22	30.78	31.55	1163.27	966.27	1208.7
752	32.68	32.68		1157.87	967.41	1207.68	30.78	31.55	1163.27	966.27	1208.7
753	32.68	32.68		1157.87	970.34	1210.61	30.78	31.55	1163.27	966.27	1208.7
754	32.68	32.68		1157.87	973.27	1212.08	30.51	31.83	1161.18	966.95	1209.35
755	32.68	32.68		1156.4	974.73	1213.54	31.48	31.48	1163.33	983.92	1218.24
756	32.68	32.68		1156.4	976.2	1215.01	31.54	31.5	1162.93	980.84	1214.19
757	32.68	32.68		1156.4	979.13	1217.94	31.48	31.48	1163.33	983.92	1218.24
758	32.68	32.68		1156.4	980.59	1219.4	31.48	31.48	1163.33	983.92	1218.24
759	32.68	32.68		1156.4	982.06	1220.87	31.48	31.48	1163.33	983.92	1218.24
760	32.68	32.68		1156.4	983.52	1222.33	31.48	31.48	1163.33	983.92	1218.24
761	32.68	32.68		1154.94	986.45	1225.26	31.54	31.5	1162.93	980.84	1214.19
762	32.68	32.68		1154.94	987.92	1226.73	31.12	31.76	1158.48	993.67	1227.85
763	32.68	32.68		1154.94	990.85	1226.73	31.6	32.14	1157.67	993.32	1228.03
764	32.68	32.68		1154.94	992.31	1228.19	32.86	30.28	1161.72	1003.61	1231.58
765	32.68	32.68		1154.94	995.24	1231.12	32.86	30.28	1161.72	1003.61	1231.58
766	32.68	32.68		1154.94	996.71	1232.59	32.86	30.28	1161.72	1003.61	1231.58
767	32.68	32.68		1153.47	998.17	1234.05	32.86	30.28	1161.72	1003.61	1231.58
768	32.68	32.68		1153.47	999.64	1235.52	29.8	33.81	1156.32	1005.76	1239
769	32.68	32.68		1153.47	1002.57	1238.45	29.9	33.58	1156.42	1010.64	1241.94
770	32.68	32.68		1153.47	1004.03	1239.91	30.16	33.52	1155.82	1012.99	1243.2
771	32.68	32.68		1153.47	1005.5	1241.38	30.16	33.52	1155.82	1012.99	1243.2
772	32.68	32.68		1153.47	1006.96	1242.84	30.16	33.52	1155.82	1012.99	1243.2
773	32.68	32.68		1152.01	1011.36	1245.77	30.16	33.52	1155.82	1012.99	1243.2
774	32.68	32.68		1152.01	1012.83	1247.24	30.16	33.52	1155.82	1012.99	1243.2
775	32.68	32.68		1152.01	1014.29	1248.71	30.46	33.61	1158.77	1017.63	1246.33
776	32.68	32.68		1152.01	1015.76	1250.17	30.46	33.61	1158.77	1017.63	1246.33
777	32.68	32.68		1152.01	1018.69	1251.64	29.76	32.13	1154.96	1005.51	1239.58
778	32.68	32.68		1152.01	1020.15	1253.1	30.48	31.29	1156.1	1006.07	1237.08
779	32.68	32.68		1150.54	1021.62	1254.57	30.48	31.29	1156.1	1006.07	1237.08
780	32.68	32.68		1150.54	1023.08	1256.03	30.48	31.29	1156.1	1006.07	1237.08
781	32.68	32.68		1150.54	1026.01	1258.96	30.71	31.64	1158.49	1014.48	1242.09
782	32.68	32.68		1150.54	1028.94	1260.43	30.71	31.64	1158.49	1014.48	1242.09
783	32.68	32.68		1150.54	1030.41	1261.89	30.47	31.9	1157.46	1029.97	1258
784	32.68	32.68		1150.54	1031.87	1263.36	30.47	31.9	1157.46	1029.97	1258
785	32.68	32.68		1149.08	1034.8	1266.29	30.19	30.46	1161.43	1034.8	1258.69
786	32.68	32.68		1149.08	1036.27	1267.75	29.84	31.26	1159.02	1032.55	1261.16
787	32.68	32.68		1149.08	1037.73	1269.22	29.84	31.26	1159.02	1032.55	1261.16
788	32.68	32.68		1149.08	1039.2	1270.68	29.32	31.28	1156.82	1030.57	1260.11
789	32.68	32.68		1149.08	1042.13	1272.15	30.85	31.83	1154.56	1037.58	1266.42
790	32.68	32.68		1149.08	1043.59	1273.61	30.85	31.83	1154.56	1037.58	1266.42
791	32.68	32.68		1149.08	1045.06	1275.08	30.85	31.83	1154.56	1037.58	1266.42
792	32.68	32.68		1147.61	1046.52	1276.54	30.81	30.66	1154.85	1041.36	1271.59
793	32.68	32.68		1147.61	1050.92	1279.47	30.77	30.7	1154.81	1041.43	1271.63
794	32.68	32.68		1147.61	1052.38	1280.94	31.09	30.59	1155.51	1042.96	1272.38
795	32.68	32.68		1147.61	1053.85	1282.4	30.66	30.84	1156.17	1045.12	1273.32
796	32.68	32.68		1147.61	1055.31	1283.87	30.66	30.84	1156.17	1045.12	1273.32
797	32.68	32.68		1146.15	1058.24	1286.8	29.52	31.26	1150.94	1038.73	1267.81
798	32.68	32.68		1146.15	1059.71	1288.26	29.52	31.26	1150.94	1038.73	1267.81
799	32.68	32.68		1146.15	1061.17	1289.73	29.66	33.21	1148.73	1044.01	1273.31
800	32.68	32.68		1146.15	1062.64	1291.19	29.81	33.22	1149.08	1044.14	1273.18
801	32.68	32.68		1147.61	1065.57	1291.19	29.56	30.84	1158.98	1055.54	1275.86
802	32.68	32.68		1149.08	1067.03	1291.19	29.3	31.45	1156.69	1056.91	1280.19
803	32.68	32.68		1150.54	1068.5	1291.19	29.3	31.45	1156.69	1056.91	1280.19
804	32.68	32.68		1153.47	1071.43	1291.19	29.3	31.45	1156.69	1056.91	1280.19
805	32.68	32.68		1156.4	1074.36	1289.73	29.3	31.45	1156.69	1056.91	1280.19
806	32.68	32.68		1157.87	1075.82	1289.73	29.34	30.98	1160.29	1060.65	1281.74
807	32.68	32.68		1159.33	1077.29	1289.73	29.36	30.68	1160.13	1060.16	1281.15
808	32.68	32.68		1160.8	1078.75	1289.73	30.87	31.43	1170.05	1072.5	1278.92
809	32.68	32.68		1165.19	1081.68	1289.73	30.48	31.6	1167.97	1068.49	1278.27
810	32.68	32.68		1166.66	1083.15	1289.73	31.94	32.2	1174.8	1074.04	1275.27
811	32.68	32.68		1168.13	1084.61	1288.26	31.94	32.2	1174.8	1074.04	1275.27
812	32.68	32.68		1169.59	1086.08	1288.26	31.94	32.2	1174.8	1074.04	1275.27
813	32.68	32.68		1172.52	1089.01	1288.26	31.63	33.16	1171.89	1076.43	1278.92
814	32.68	32.68		1173.99	1090.48	1288.26	31.76	32.91	1172.31	1076.55	1278.75
815	32.68	32.68		1175.45	1091.94	1288.26	31.79	32.93	1172.12	1076.49	1278.9
816	32.68	32.68		1178.38	1093.41	1286.8	33.06	31.94	1188.04	1087.37	1275.47
817	32.68	32.68		1181.31	1096.34	1286.8	31.93	30.59	1195.18	1096.36	1275.16
818	32.68	32.68		1182.78	1099.27	1286.8	31.93	30.59	1195.18	1096.36	1275.16
819	32.68	32.68		1184.24	1100.73	1286.8	31.93	30.59	1195.18	1096.36	1275.16
820	32.68	32.68		1185.71	1102.2	1286.8	31.93	30.59	1195.18	1096.36	1275.16
821	32.68	32.68		1190.1	1105.13	1285.33	31.61	29.92	1197.9	1096.97	1272.25
822	32.68	32.68		1191.57	1106.59	1285.33	32.86	28.52	1203.76	1100.62	1270.93
823	32.68	32.68		1193.03	1108.06	1285.33	32.29	31.71	1201.47	1100.88	1271.38
824	32.68	32.68		1194.5	1109.52	1285.33	32.29	31.71	1201.47	1100.88	1271.38
825	32.68	32.68		1197.43	1112.45	1283.87	32.29	31.71	1201.47	1100.88	1271.38
826	32.68	32.68		1198.89	1113.92	1283.87	32.29	31.71	1201.47	1100.88	1271.38
827	32.68	32.68		1200.36	1115.38	1283.87	32.29	31.71	1201.47	1100.88	1271.38
828	32.68	32.68		1203.29	1116.85	1283.87	32.27	30.07	1205	1097.02	1268.42
829	32.68	32.68		1206.22	1119.78	1283.87	32.13	29.83	1204.74	1095.5	1267.17
830	32.68	32.68		1207.68	1121.24	1283.87	32.18	28.57	1205.64	1105.9	1276.7
831	32.68	32.68		1209.15	1122.71	1282.4	32.18	28.57	1205.64	1105.9	1276.7
832	32.68	32.68		1210.61	1124.17	1282.4	32.18	28.57	1205.64	1105.9	1276.7
833	32.68	32.68		1213.54	1127.1	1282.4	32.18	28.57	1205.64	1105.9	1276.7
834	32.68	32.68		1216.47	1128.57	1282.4	32.18	28.57	1205.64	1105.9	1276.7
835	32.68	32.68		1217.94	1131.5	1282.4	32.81	28.4	1210.84	1111.82	1275.47
836	32.68	32.68		1219.4	1132.96	1280.94	32.18	28.57	1205.64	1105.9	1276.7
837	32.68	32.68		1222.33	1135.89	1280.94	32.18	28.57	1205.64	1105.9	1276.7
838	32.68	32.68		1223.8	1137.36	1280.94	32.18	28.57	1205.64	1105.9	1276.7
839	32.68	32.68		1225.26	1138.82	1280.94	32.18	28.57	1205.64	1105.9	1276.7
840	32.68	32.68		1226.73	1140.29	1280.94	32.18	28.57	1205.64	1105.9	1276.7
841	32.68	32.68		1231.12	1143.22	1279.47	32.81	28.4	1210.84	1111.82	1275.47
842	48.79	32.68		1231.12	1143.22	1278.01	44.33	32.78	1230.51	1134.84	1269.33
843	48.79	32.68		1232.59	1144.68	1278.01	44.33	32.78	1230.51	1134.84	1269.33
844	48.79	32.68		1234.05	1146.15	1278.01	43.71	31.71	1233.37	1137.46	1268.99
845	48.79	32.68		1238.45	1149.08	1278.01	43.71	31.71	1233.37	1137.46	1268.99
846	48.79	32.68		1239.91	1150.54	1278.01	44.28	31.56	1238.99	1140.03	1265.95
847	48.79	32.68		1241.38	1153.47	1278.01	44.28	31.56	1238.99	1140.03	1265.95
848	48.79	32.68		1242.84	1154.94	1276.54	42.99	30.94	1230.58	1131.08	1268.1
849	48.79	32.68		1245.77	1157.87	1276.54	46.64	33.16	1246.65	1144.26	1264.99
850	48.79	32.68		1247.24	1159.33	1276.54	45.93	33.19	1242.12	1141.51	1267.86
851	48.79	32.68		1248.71	1160.8	1276.54	46.4	33.39	1245.71	1144.24	1266.53
852	48.79	32.68		1251.64	1162.26	1276.54	46.4	33.39	1245.71	1144.24	1266.53
853	48.79	32.68		1254.57	1165.19	1275.08	45.89	31.21	1248.38	1145.29	1267.05
854	48.79	32.68		1256.03	1166.66	1275.08	45.89	31.21	1248.38	1145.29	1267.05
855	48.79	32.68		1257.5	1168.13	1275.08	46.26	32.09	1251.55	1150.92	1268.51
856	48.79	32.68		1258.96	1169.59	1275.08	46.26	32.09	1251.55	1150.92	1268.51
857	48.79	32.68		1261.89	1172.52	1275.08	46.71	30.47	1265.84	1163.25	1271.26
858	48.79	32.68		1264.82	1173.99	1273.61	46.71	30.47	1265.84	1163.25	1271.26
859	48.79	32.68		1266.29	1175.45	1273.61	46.71	30.47	1265.84	1163.25	1271.26
860	48.79	32.68		1267.75	1176.92	1273.61	47.03	30	1268.83	1166.11	1271.08
861	48.79	32.68		1270.68	1179.85	1273.61	46.99	30.01	1267.67	1164.78	1270.77
862	48.79	32.68		1272.15	1181.31	1273.61	44.93	29.65	1260.87	1154.67	1268.56
863	48.79	32.68		1273.61	1182.78	1272.15	45.87	29.04	1272.26	1169.08	1268.73
864	48.79	32.68		1275.08	1184.24	1272.15	42.79	29.36	1263.59	1155.9	1263.68
865	48.79	32.68		1279.47	1187.17	1272.15	42.79	29.36	1263.59	1155.9	1263.68
866	48.79	32.68		1280.94	1188.64	1272.15	43.46	28.94	1272.11	1164.78	1263.62
867	48.79	32.68		1282.4	1190.1	1272.15	43.88	28.98	1272.58	1164.34	1261.86
868	48.79	32.68		1283.87	1191.57	1270.68	43.88	28.98	1272.58	1164.34	1261.86
869	48.79	32.68		1286.8	1194.5	1270.68	43.54	29.79	1276.27	1172.12	1263.72
870	48.79	32.68		1288.26	1195.96	1270.68	46.41	29.95	1291.95	1191.65	1261.41
871	48.79	32.68		1289.73	1197.43	1270.68	46.41	29.95	1291.95	1191.65	1261.41
872	48.79	32.68		1291.19	1198.89	1270.68	46.41	29.95	1291.95	1191.65	1261.41
873	48.79	32.68		1295.59	1203.29	1269.22	47.12	31.27	1297.04	1197.4	1260.94
874	48.79	32.68		1297.05	1204.75	1269.22	46.92	31.08	1300.43	1200.41	1260.87
875	48.79	32.68		1298.52	1206.22	1269.22	46.92	31.07	1300.27	1200.36	1260.92
876	48.79	32.68		1299.98	1207.68	1269.22	47.31	29.91	1300.35	1194.88	1256.67
877	48.79	32.68		1302.91	1210.61	1269.22	46.97	29.51	1311.06	1210.33	1264.74
878	48.79	32.68		1304.38	1212.08	1267.75	46.97	29.51	1311.06	1210.33	1264.74
879	48.79	32.68		1305.84	1213.54	1267.75	46.97	29.51	1311.06	1210.33	1264.74
880	48.79	32.68		1307.31	1215.01	1267.75	46.97	29.51	1311.06	1210.33	1264.74
881	48.79	32.68		1311.7	1217.94	1267.75	47.61	29.44	1314.72	1210.96	1262.27
882	48.79	32.68		1313.17	1219.4	1267.75	46.97	29.51	1311.06	1210.33	1264.74
883	48.79	32.68		1314.63	1220.87	1267.75	46.97	29.51	1311.06	1210.33	1264.74
884	48.79	32.68		1316.1	1222.33	1266.29	46.97	29.51	1311.06	1210.33	1264.74
885	48.79	32.68		1319.03	1225.26	1266.29	46.97	29.51	1311.06	1210.33	1264.74
886	48.79	32.68		1320.49	1226.73	1266.29	46.97	29.51	1311.06	1210.33	1264.74
887	48.79	32.68		1321.96	1228.19	1266.29	46.97	29.51	1311.06	1210.33	1264.74
888	48.79	32.68		1323.42	1229.66	1266.29	47.61	29.44	1314.72	1210.96	1262.27
889	48.79	32.68		1327.82	1232.59	1264.82	46.95	30	1313.25	1209.1	1261.99
890	48.79	32.68		1329.29	1234.05	1264.82	46.95	30	1313.25	1209.1	1261.99
891	48.79	32.68		1330.75	1235.52	1264.82	46.95	30	1313.25	1209.1	1261.99
892	48.79	32.68		1332.22	1236.98	1264.82	48.89	28.08	1316.49	1211.1	1258.83
893	48.79	32.68		1335.15	1239.91	1264.82	48.89	28.08	1316.49	1211.1	1258.83
894	48.79	32.68		1336.61	1241.38	1263.36	48.89	28.08	1316.49	1211.1	1258.83
895	48.79	32.68		1338.08	1242.84	1263.36	48.84	27.62	1324.04	1217.49	1257.82
896	48.79	32.68		1339.54	1244.31	1263.36	48.84	27.62	1324.04	1217.49	1257.82
897	48.79	32.68		1343.94	1247.24	1263.36	48.67	31.47	1338.8	1231.99	1258.27
898	48.79	32.68		1345.4	1248.71	1263.36	49.17	30.39	1340.62	1233.02	1254.26
899	48.79	32.68		1346.87	1250.17	1261.89	49.17	30.39	1340.62	1233.02	1254.26
900	48.79	32.68		1348.33	1251.64	1261.89	49.17	30.39	1340.62	1233.02	1254.26
901	48.79	32.68		1351.26	1254.57	1261.89	49.03	30.6	1350.41	1241.43	1252.76
902	48.79	32.68		1352.73	1256.03	1261.89	49.03	30.6	1350.41	1241.43	1252.76
903	48.79	32.68		1354.19	1257.5	1261.89	49.33	30.43	1362.05	1253.04	1250.39
904	48.79	32.68		1355.66	1258.96	1261.89	50.26	30.92	1359.49	1250.46	1250.18
905	48.79	32.68		1358.59	1261.89	1260.43	50.24	30.97	1359.59	1250.31	1250.19
906	48.79	32.68		1361.52	1263.36	1260.43	49.73	31.84	1374.51	1261.72	1245.16
907	48.79	32.68		1362.98	1264.82	1260.43	49.73	31.84	1374.51	1261.72	1245.16
908	48.79	32.68		1364.45	1266.29	1260.43	49.56	31.92	1373.28	1260.4	1245.13
909	48.79	32.68		1367.38	1269.22	1260.43	49.55	30.96	1374.35	1257.92	1241.68
910	47.33	32.68		1368.84	1270.68	1258.96	49.55	30.96	1374.35	1257.92	1241.68
911	47.33	32.68		1370.31	1272.15	1258.96	49.55	30.96	1374.35	1257.92	1241.68
912	47.33	32.68		1371.77	1273.61	1258.96	49.96	31.51	1378.76	1263.02	1242.76
913	47.33	32.68		1374.7	1276.54	1258.96	49.97	31.58	1378.74	1262.92	1242.61
914	47.33	32.68		1376.17	1278.01	1258.96	49.63	31.21	1378.75	1266.23	1248.43
915	47.33	32.68		1379.1	1279.47	1257.5	49.35	31.1	1377.97	1266.92	1248.4
916	47.33	32.68		1380.56	1280.94	1257.5	49.41	33.87	1386.52	1274.93	1245.5
917	47.33	32.68		1383.49	1283.87	1257.5	49.41	33.87	1386.52	1274.93	1245.5
918	47.33	32.68		1384.96	1285.33	1257.5	48.95	33.71	1392.9	1279.66	1243.56
919	47.33	32.68		1386.42	1286.8	1257.5	48.98	33.7	1392.69	1279.27	1243.53
920	47.33	32.68		1387.89	1288.26	1257.5	48.98	33.7	1392.69	1279.27	1243.53
921	47.33	32.68		1390.82	1291.19	1256.03	48.57	34.75	1389.14	1279.08	1243.55
922	47.33	47.33		1392.28	1292.66	1254.57	48.57	34.75	1389.14	1279.08	1243.55
923	47.33	47.33		1393.75	1294.12	1254.57	48.34	38.78	1405.88	1293.69	1242.43
924	47.33	47.33		1395.21	1295.59	1254.57	48.34	38.78	1405.88	1293.69	1242.43
925	47.33	47.33		1398.14	1298.52	1254.57	48.34	38.78	1405.88	1293.69	1242.43
926	47.33	47.33		1399.61	1299.98	1254.57	48.47	38.97	1405.65	1292.79	1243.71
927	47.33	47.33		1401.07	1301.45	1253.1	48.36	38.72	1406.44	1293.59	1243.78
928	47.33	47.33		1402.54	1302.91	1253.1	48.46	38.9	1405.77	1292.72	1243.45
929	47.33	47.33		1405.47	1305.84	1253.1	48.66	37.76	1402.51	1290.87	1243.22
930	47.33	47.33		1406.94	1307.31	1253.1	48	39.27	1395.29	1283.71	1243.42
931	47.33	47.33		1408.4	1308.77	1253.1	48	39.27	1395.29	1283.71	1243.42
932	47.33	47.33		1409.87	1310.24	1253.1	48	39.27	1395.29	1283.71	1243.42
933	47.33	47.33		1414.26	1313.17	1251.64	47.87	38.76	1404.73	1291.66	1241.65
934	47.33	47.33		1415.73	1314.63	1251.64	47.87	38.76	1404.73	1291.66	1241.65
935	47.33	47.33		1417.19	1316.1	1251.64	48.87	39.33	1411.15	1295.35	1242.16
936	47.33	47.33		1418.66	1317.56	1251.64	48.68	39.11	1412.88	1298.29	1243.65
937	47.33	47.33		1421.59	1320.49	1251.64	50.33	38.79	1426.01	1313.25	1240.96
938	47.33	47.33		1423.05	1321.96	1250.17	50.33	38.79	1426.01	1313.25	1240.96
939	47.33	47.33		1424.52	1323.42	1250.17	50.33	38.79	1426.01	1313.25	1240.96
940	47.33	47.33		1425.98	1324.89	1250.17	50.33	38.79	1426.01	1313.25	1240.96
941	47.33	47.33		1428.91	1327.82	1250.17	49.75	38.8	1424.9	1311.82	1238.59
942	47.33	47.33		1430.38	1329.29	1250.17	49.85	39.38	1419.47	1306.97	1238.56
943	47.33	47.33		1433.31	1330.75	1248.71	48.08	41.42	1445.48	1334.43	1237.06
944	47.33	47.33		1434.77	1332.22	1248.71	48.08	41.42	1445.48	1334.43	1237.06
945	47.33	47.33		1437.7	1335.15	1248.71	48.08	41.42	1445.48	1334.43	1237.06
946	47.33	47.33		1439.17	1336.61	1248.71	48.08	41.42	1445.48	1334.43	1237.06
947	47.33	47.33		1440.63	1338.08	1248.71	48.08	41.42	1445.48	1334.43	1237.06
948	47.33	47.33		1442.1	1339.54	1248.71	49.13	40.99	1442.92	1331.47	1237.15
949	47.33	47.33		1445.03	1342.47	1247.24	48.49	40.14	1447.02	1334.07	1237.73
950	47.33	47.33		1446.49	1343.94	1247.24	49.95	38.92	1450.99	1336.39	1236.82
951	47.33	47.33		1447.96	1345.4	1247.24	49.95	38.92	1450.99	1336.39	1236.82
952	47.33	47.33		1449.42	1346.87	1247.24	49.95	38.92	1450.99	1336.39	1236.82
953	47.33	47.33		1452.35	1349.8	1247.24	49.95	38.92	1450.99	1336.39	1236.82
954	47.33	47.33		1453.82	1351.26	1245.77	50.88	41.21	1454.49	1340.03	1238.13
955	47.33	47.33		1456.75	1352.73	1245.77	47.2	39.95	1461.26	1340.52	1235.54
956	47.33	47.33		1458.21	1354.19	1245.77	48.17	40.86	1467.47	1345.87	1235.74
957	47.33	47.33		1461.14	1357.12	1245.77	48.32	42.1	1469.1	1350.97	1232.86
958	47.33	47.33		1462.61	1358.59	1245.77	48.32	42.1	1469.1	1350.97	1232.86
959	47.33	47.33		1464.07	1358.59	1244.31	48.32	42.1	1469.1	1350.97	1232.86
960	47.33	47.33		1465.54	1360.05	1244.31	48.32	42.1	1469.1	1350.97	1232.86
961	1.91	19.5		1.91	1.91	19.5	49.38	28.68	56.38	67.44	27.6
962	3.38	19.5		4.84	4.84	19.5	46.72	29.5	52.85	64.02	27.96
963	6.31	19.5		6.31	6.31	19.5	45.4	27.72	52.67	62.54	28.17
964	7.77	19.5		9.24	7.77	19.5	50.08	30.78	57.95	69.4	29.41
965	12.17	19.5		13.64	12.17	19.5	50.84	31.15	59.47	70.68	30.01
966	13.64	19.5		16.57	15.1	19.5	51.52	29.03	61.69	71.41	30.97
967	15.1	19.5		18.03	16.57	19.5	51.52	29.03	61.69	71.41	30.97
968	16.57	19.5		20.96	19.5	19.5	55.5	29.14	65.39	74.89	29.86
969	20.96	19.5		25.36	23.9	19.5	57.77	31.22	69.31	81.78	28.82
970	22.43	19.5		26.83	25.36	19.5	56.85	30.81	68.26	80.31	28.73
971	25.36	19.5		29.76	26.83	19.5	63.51	32.39	76.18	87.9	29.73
972	26.83	19.5		31.22	29.76	19.5	63.51	32.39	76.18	87.9	29.73
973	29.76	19.5		37.09	34.16	19.5	63.51	32.39	76.18	87.9	29.73
974	32.69	19.5		38.55	35.62	19.5	63.51	32.39	76.18	87.9	29.73
975	34.16	19.5		41.48	38.55	19.5	65.9	29.46	80.72	91.1	30.24
976	35.62	19.5		42.95	40.02	19.5	66.13	29.22	81.32	91	30.99
977	40.02	19.5		47.35	44.42	19.5	70.61	28.28	87.92	96.64	31.52
978	41.48	19.5		50.28	45.88	19.5	70.61	28.28	87.92	96.64	31.52
979	42.95	19.5		51.74	48.81	19.5	70.61	28.28	87.92	96.64	31.52
980	45.88	19.5		54.68	50.28	19.5	70.61	28.28	87.92	96.64	31.52
981	48.81	19.5		59.07	54.68	19.5	69.99	28.9	86.9	96.31	31.93
982	51.74	19.5		60.54	56.14	19.5	80.96	26.29	98.61	104.56	29.81
983	53.21	19.5		63.47	59.07	19.5	84.92	27.03	102.3	107.99	29.76
984	54.68	19.5		66.4	60.54	19.5	85.07	27.18	102.13	108	29.76
985	59.07	19.5		70.8	64.93	19.5	91.27	25.09	111.61	113.11	29.92
986	60.54	19.5		72.26	67.87	19.5	91.27	25.09	111.61	113.11	29.92
987	62	19.5		75.19	69.33	19.5	91.27	25.09	111.61	113.11	29.92
988	64.93	19.5		76.66	70.8	19.5	89.86	25.63	109.96	112.29	29.44
989	67.87	19.5		81.06	75.19	19.5	89.68	27.17	107.65	111.95	27.55
990	69.33	19.5		83.99	78.13	19.5	89.7	27.17	108.55	112.93	27.99
991	72.26	19.5		85.45	79.59	19.5	89.61	27.09	108.49	112.84	27.97
992	73.73	19.5		88.39	81.06	19.5	92.51	26.64	111.36	114.55	28.26
993	76.66	19.5		92.78	85.45	19.5	92.51	26.64	111.36	114.55	28.26
994	79.59	19.5		94.25	88.39	19.5	92.51	26.64	111.36	114.55	28.26
995	81.06	19.5		97.18	89.85	19.5	93.54	26.75	112.52	116.14	29
996	82.52	19.5		98.65	92.78	19.5	105.49	25.69	129.01	128.95	24.97
997	86.92	19.5		103.04	95.71	19.5	108.1	25.07	130.76	130.99	24.19
998	88.39	19.5		105.97	98.65	19.5	112.93	23.84	138.22	137.11	24.79
999	89.85	19.5		107.44	100.11	19.5	112.93	23.84	138.22	137.11	24.79
1000	92.78	19.5		110.37	103.04	19.5	112.93	23.84	138.22	137.11	24.79
1001	95.71	19.5		114.77	105.97	19.5	111.92	24.03	136	135.07	24.25
1002	97.18	19.5		117.7	108.91	19.5	113.31	21.03	137.42	133.61	29.94
1003	100.11	19.5		119.16	110.37	19.5	113.31	21.03	137.42	133.61	29.94
1004	101.58	19.5		122.1	113.3	19.5	114.29	21.1	138.14	134.17	28.63
1005	104.51	19.5		126.49	116.23	19.5	114.58	21.25	138.7	134.71	28.57
1006	107.44	19.5		127.96	119.16	19.5	118.41	22.2	142.76	140.55	28.13
1007	108.91	19.5		130.89	120.63	19.5	118.41	22.2	142.76	140.55	28.13
1008	110.37	19.5		132.36	123.56	19.5	118.38	21.46	142.63	139.79	28.48
1009	114.77	19.5		136.75	126.49	19.5	125.52	22.48	151.23	146.47	25.16
1010	116.23	19.5		139.68	129.42	19.5	125.52	22.48	151.23	146.47	25.16
1011	117.7	19.5		141.15	130.89	19.5	126.9	21.13	153.45	147.83	25.3
1012	120.63	19.5		144.08	133.82	19.5	125.79	21.74	152.32	147.34	25.74
1013	123.56	19.5		148.48	136.75	19.5	132.4	17.96	162.77	152.63	26.63
1014	125.03	19.5		149.94	139.68	19.5	132.4	17.96	162.77	152.63	26.63
1015	127.96	19.5		152.88	141.15	19.5	131.24	18.76	160.7	151.67	26.73
1016	129.42	19.5		154.34	142.62	19.5	131.24	18.76	160.7	151.67	26.73
1017	132.36	19.5		158.74	147.01	19.5	144.09	15.71	176.82	162.79	22.78
1018	135.29	19.5		161.67	149.94	19.5	146.06	14.7	181.16	165.19	23.08
1019	136.75	19.5		163.14	151.41	19.5	146.06	14.7	181.16	165.19	23.08
1020	138.22	19.5		166.07	152.88	19.5	146.06	14.7	181.16	165.19	23.08
1021	141.15	19.5		170.46	157.27	19.5	144.2	16.14	176.24	161.88	22.77
1022	144.08	19.5		171.93	160.2	19.5	166.64	15.77	198.42	181.66	21.78
1023	145.55	19.5		173.39	161.67	19.5	166.64	15.77	198.42	181.66	21.78
1024	147.01	19.5		176.33	163.14	19.5	166.64	15.77	198.42	181.66	21.78
1025	151.41	19.5		180.72	167.53	19.5	167.15	16.27	198.66	181.92	22.22
1026	152.88	19.5		182.19	169	19.5	166.8	16.22	198.31	181.75	22.32
1027	154.34	19.5		185.12	171.93	19.5	166.8	16.22	198.31	181.75	22.32
1028	155.81	19.5		186.59	173.39	19.5	172.23	15.99	203.68	185.5	21.26
1029	160.2	19.5		190.98	177.79	19.5	172.6	16.88	203.68	185.77	21.12
1030	161.67	19.5		193.91	179.26	19.5	174.77	19.92	210.27	198.8	25.05
1031	163.14	19.5		195.38	182.19	19.5	174.77	19.92	210.27	198.8	25.05
1032	166.07	19.5		198.31	183.65	19.5	174.77	19.92	210.27	198.8	25.05
1033	169	19.5		202.71	188.05	19.5	175.69	19.51	212.05	199.1	25.39
1034	170.46	19.5		204.17	189.52	19.5	175.7	19.71	211.95	199.14	25.24
1035	173.39	19.5		207.11	190.98	19.5	175.7	19.71	211.95	199.14	25.24
1036	174.86	19.5		208.57	193.91	19.5	180.64	18.79	218.6	202.52	24.06
1037	177.79	19.5		212.97	198.31	19.5	193.47	22.01	232.16	214.58	22.3
1038	179.26	19.5		215.9	199.78	19.5	193.47	22.01	232.16	214.58	22.3
1039	182.19	19.5		217.36	201.24	19.5	193.47	22.01	232.16	214.58	22.3
1040	183.65	19.5		218.83	204.17	19.5	193.47	22.01	232.16	214.58	22.3
1041	186.59	19.5		223.23	207.11	19.5	193.46	21.93	232.12	214.37	22.51
1042	189.52	19.5		226.16	210.04	19.5	200.75	21.24	239.11	220.81	21.31
1043	190.98	19.5		227.62	211.5	19.5	200.75	21.24	239.11	220.81	21.31
1044	192.45	19.5		230.56	212.97	19.5	200.75	21.24	239.11	220.81	21.31
1045	195.38	19.5		234.95	217.36	19.5	200.75	21.24	239.11	220.81	21.31
1046	198.31	19.5		236.42	220.3	19.5	200.75	21.24	239.11	220.81	21.31
1047	199.78	19.5		239.35	221.76	19.5	200.75	21.24	239.11	220.81	21.31
1048	201.24	19.5		240.82	223.23	19.5	199.28	20.74	237.95	219.76	21.23
1049	205.64	19.5		245.21	227.62	19.5	212.03	18.1	252.75	231.92	22.16
1050	207.11	19.5		246.68	229.09	19.5	212.36	17.93	253.18	232.21	22.28
1051	208.57	19.5		249.61	232.02	19.5	212.36	17.93	253.18	232.21	22.28
1052	210.04	19.5		251.08	233.49	19.5	217.48	17.85	259.2	238.11	21.05
1053	214.43	19.5		255.47	237.88	19.5	217.48	17.85	259.2	238.11	21.05
1054	215.9	19.5		258.4	239.35	19.5	217.48	17.85	259.2	238.11	21.05
1055	217.36	19.5		259.87	240.82	19.5	220.56	16.25	262.14	239.76	19.37
1056	218.83	19.5		262.8	243.75	19.5	231.23	14.95	279.87	251.48	17.1
1057	223.23	19.5		267.2	246.68	19.5	232.7	14.84	280.86	252.5	16.65
1058	224.69	19.5		268.66	249.61	19.5	232.7	14.84	280.86	252.5	16.65
1059	226.16	19.5		270.13	251.08	19.5	232.56	14.71	280.47	253.41	17.07
1060	227.62	19.5		273.06	252.54	19.5	232.56	14.71	280.47	253.41	17.07
1061	232.02	19.5		277.46	256.94	19.5	235.52	14.55	282.65	255.48	15.68
1062	233.49	19.5		278.92	258.4	19.5	236.34	14.24	286.7	258.72	19.23
1063	234.95	19.5		281.85	261.34	19.5	236.34	14.24	286.7	258.72	19.23
1064	236.42	19.5		283.32	262.8	19.5	237.26	14.45	286.65	259.31	17.55
1065	240.82	19.5		287.72	267.2	19.5	237.53	14.46	286.92	259.59	17.52
1066	242.28	19.5		289.18	268.66	19.5	237.12	14.76	286.08	258.94	18.27
1067	243.75	19.5		292.11	270.13	19.5	237.12	14.76	286.08	258.94	18.27
1068	245.21	19.5		293.58	273.06	19.5	237.08	15.12	285.88	259.76	17.71
1069	249.61	19.5		297.98	275.99	19.5	253.7	18.72	307.11	281.09	17.62
1070	251.08	19.5		300.91	278.92	19.5	253.7	18.72	307.11	281.09	17.62
1071	252.54	19.5		302.37	280.39	19.5	253.7	18.72	307.11	281.09	17.62
1072	254.01	19.5		303.84	281.85	19.5	257.55	19.41	311.2	284.79	17.4
1073	258.4	19.5		308.24	286.25	19.5	258.38	19.8	312.09	285.64	17.3
1074	259.87	19.5		311.17	287.72	19.5	261.33	20.44	314.2	287.96	16.42
1075	261.34	19.5		312.63	290.65	19.5	260.56	19.9	313.17	287.2	16.68
1076	262.8	19.5		315.57	292.11	19.5	282.19	26.67	339.27	311.89	16.76
1077	267.2	19.5		318.5	296.51	19.5	282.19	26.67	339.27	311.89	16.76
1078	268.66	19.5		321.43	297.98	19.5	282.19	26.67	339.27	311.89	16.76
1079	270.13	19.5		322.89	299.44	19.5	282.19	26.67	339.27	311.89	16.76
1080	271.59	19.5		325.82	302.37	19.5	284.54	27.96	340.81	313.49	15.38
1081	275.99	19.5		330.22	305.31	19.5	285.16	28.23	341.69	314.23	15.52
1082	277.46	38.55		331.69	306.77	19.5	284.56	30.55	339.54	314.12	15.6
1083	278.92	38.55		333.15	309.7	19.5	286.58	31.66	342.87	318.48	19.82
1084	280.39	38.55		336.08	311.17	19.5	286.58	31.66	342.87	318.48	19.82
1085	283.32	38.55		339.02	315.57	19.5	286.58	31.66	342.87	318.48	19.82
1086	286.25	38.55		341.95	317.03	19.5	286.58	31.66	342.87	318.48	19.82
1087	287.72	38.55		343.41	318.5	19.5	294.53	33.5	350.58	325.39	17.63
1088	289.18	38.55		346.34	321.43	19.5	294.75	33.57	350.84	325.62	17.75
1089	292.11	38.55		350.74	324.36	19.5	299	36.3	359.21	336.22	20.38
1090	295.05	38.55		352.21	327.29	19.5	299	36.3	359.21	336.22	20.38
1091	296.51	38.55		353.67	328.76	19.5	299	36.3	359.21	336.22	20.38
1092	297.98	38.55		356.6	330.22	19.5	299	36.3	359.21	336.22	20.38
1093	300.91	38.55		361	334.62	19.5	300.5	36.14	361.44	337.36	19.59
1094	302.37	38.55		362.47	336.08	19.5	300.5	36.14	361.44	337.36	19.59
1095	305.31	38.55		363.93	337.55	19.5	300.5	36.14	361.44	337.36	19.59
1096	306.77	38.55		366.86	340.48	19.5	315.89	36.63	378.25	350.6	20.96
1097	309.7	38.55		371.26	343.41	19.5	317.72	37.28	379.76	351.3	19.12
1098	311.17	38.55		372.73	346.34	19.5	317.72	37.28	379.76	351.3	19.12
1099	312.63	37.09		374.19	347.81	19.5	317.72	37.28	379.76	351.3	19.12
1100	315.57	37.09		377.12	349.28	19.5	317.72	37.28	379.76	351.3	19.12
1101	318.5	37.09		381.52	353.67	19.5	313.61	36.19	377.48	349.12	19.33
1102	319.96	37.09		382.99	355.14	19.5	330.59	36.8	395.59	357.99	17.71
1103	321.43	37.09		384.45	356.6	19.5	324.59	35.61	387.99	361.77	18.55
1104	322.89	37.09		387.38	359.54	19.5	324.59	35.61	387.99	361.77	18.55
1105	327.29	37.09		391.78	362.47	19.5	324.59	35.61	387.99	361.77	18.55
1106	328.76	37.09		393.25	365.4	19.5	324.59	35.61	387.99	361.77	18.55
1107	330.22	37.09		394.71	366.86	19.5	324.59	35.61	387.99	361.77	18.55
1108	331.69	37.09		397.64	368.33	19.5	336.74	37.43	402.31	372.21	18.26
1109	336.08	37.09		402.04	372.73	19.5	335.88	36.65	401.59	372.18	18.03
1110	337.55	37.09		403.51	374.19	19.5	353.06	40.35	421.16	388.59	17.4
1111	339.02	37.09		404.97	375.66	19.5	353.06	40.35	421.16	388.59	17.4
1112	340.48	37.09		407.9	378.59	19.5	353.06	40.35	421.16	388.59	17.4
1113	343.41	37.09		412.3	381.52	19.5	353.06	40.35	421.16	388.59	17.4
1114	346.34	37.09		413.77	384.45	19.5	355.12	39.77	423.19	389.94	17.11
1115	347.81	37.09		415.23	385.92	19.5	364.85	38.64	433.9	393.49	16.74
1116	349.28	37.09		418.16	387.38	19.5	369	37.29	439.45	393.53	15.66
1117	352.21	37.09		421.09	391.78	19.5	364.85	38.64	433.9	393.49	16.74
1118	353.67	37.09		424.02	393.25	19.5	364.85	38.64	433.9	393.49	16.74
1119	356.6	37.09		425.49	394.71	19.5	364.85	38.64	433.9	393.49	16.74
1120	358.07	37.09		428.42	396.18	18.03	364.85	38.64	433.9	393.49	16.74
1121	361	37.09		431.35	399.11	18.03	369	37.29	439.45	393.53	15.66
1122	362.47	37.09		434.28	399.11	18.03	369	37.29	439.45	393.53	15.66
1123	363.93	37.09		435.75	399.11	18.03	378.72	36.58	453.7	394.8	18.27
1124	366.86	37.09		438.68	399.11	18.03	379.85	36.79	455.55	396.16	18.45
1125	369.79	37.09		441.61	397.64	18.03	383.23	35.12	458.41	397.67	18.91
1126	371.26	37.09		444.54	397.64	18.03	383.23	35.12	458.41	397.67	18.91
1127	372.73	37.09		446.01	397.64	18.03	383.23	35.12	458.41	397.67	18.91
1128	374.19	37.09		448.94	397.64	18.03	382.34	36.03	457.81	396.07	18.68
1129	378.59	37.09		451.87	397.64	18.03	385.29	36.23	459.82	396.3	17.28
1130	380.05	37.09		454.8	397.64	18.03	385.59	36.23	460.27	396.25	17.21
1131	381.52	37.09		456.27	397.64	18.03	394.6	34.99	471.8	398.26	18.11
1132	382.99	37.09		459.2	397.64	18.03	394.6	34.99	471.8	398.26	18.11
1133	387.38	37.09		462.13	397.64	18.03	394.6	34.99	471.8	398.26	18.11
1134	388.85	37.09		465.06	397.64	18.03	394.6	34.99	471.8	398.26	18.11
1135	390.31	37.09		466.53	397.64	18.03	398.31	34.42	476.86	399.67	17.73
1136	391.78	37.09		469.46	397.64	18.03	398.31	34.42	476.86	399.67	17.73
1137	394.71	37.09		472.39	397.64	18.03	409.57	32.19	492.13	401.12	17.42
1138	397.64	37.09		475.32	397.64	18.03	409.39	32.21	492	401.15	17.51
1139	399.11	37.09		476.79	397.64	18.03	412.16	31.84	496.68	403.45	18.29
1140	400.57	37.09		479.72	396.18	18.03	412.16	31.84	496.68	403.45	18.29
1141	403.51	37.09		482.65	396.18	18.03	412.02	31.84	496.66	402.86	18.76
1142	404.97	37.09		485.58	396.18	18.03	412.02	31.84	496.66	402.86	18.76
1143	407.9	37.09		487.05	396.18	18.03	425.34	32.96	509.38	400.8	17.81
1144	409.37	37.09		489.98	396.18	18.03	428.43	32.5	513.15	402.11	17.78
1145	412.3	37.09		492.91	396.18	18.03	427.6	32.57	512.17	401.58	17.6
1146	413.77	37.09		495.84	396.18	18.03	424.91	33.46	508	400.65	15.08
1147	415.23	37.09		497.31	396.18	18.03	424.91	33.46	508	400.65	15.08
1148	418.16	37.09		500.24	396.18	18.03	424.68	33.45	507.81	400.44	15.64
1149	421.09	37.09		503.17	396.18	18.03	432.03	29.87	520.53	399.1	18.33
1150	422.56	37.09		506.1	396.18	18.03	432.03	29.87	520.53	399.1	18.33
1151	424.02	37.09		507.57	396.18	18.03	433.98	29.42	522.05	400.29	17.81
1152	425.49	37.09		509.03	396.18	18.03	433.83	29.19	522.16	400.1	17.64
1153	429.89	37.09		513.43	396.18	18.03	443.87	29.38	534.41	402.17	18.66
1154	431.35	37.09		516.36	396.18	18.03	443.87	29.38	534.41	402.17	18.66
1155	432.82	37.09		517.83	394.71	18.03	441.88	29.33	532.97	402.04	19.12
1156	434.28	37.09		519.29	394.71	18.03	442.3	29.26	533.41	402.07	19.1
1157	437.22	37.09		523.69	394.71	18.03	453.45	32.28	547	399.48	20.72
1158	440.15	37.09		526.62	394.71	18.03	453.31	32.67	546.78	399.05	20.85
1159	441.61	37.09		528.09	394.71	18.03	453.26	32.61	546.67	399.08	20.86
1160	443.08	37.09		529.55	394.71	18.03	453.26	32.61	546.67	399.08	20.86
1161	446.01	37.09		533.95	394.71	18.03	461.62	32.02	558.17	401.34	21.34
1162	447.48	37.09		535.42	394.71	18.03	461.62	32.02	558.17	401.34	21.34
1163	450.41	37.09		538.35	394.71	18.03	464.93	33.46	561.15	399.33	22.63
1164	451.87	37.09		539.81	394.71	18.03	464.93	33.46	561.15	399.33	22.63
1165	454.8	37.09		544.21	394.71	18.03	464.88	34.05	561.22	398.76	23.05
1166	456.27	37.09		545.68	394.71	18.03	464.07	33.99	560.47	398.83	22.95
1167	457.74	37.09		548.61	394.71	18.03	464.07	33.99	560.47	398.83	22.95
1168	459.2	37.09		550.07	394.71	18.03	460.19	32.98	556.14	399.86	21.21
1169	463.6	37.09		554.47	394.71	18.03	474.01	33.63	572.07	398.42	23.02
1170	465.06	37.09		555.94	393.25	18.03	474.01	33.63	572.07	398.42	23.02
1171	466.53	37.09		558.87	393.25	18.03	474.01	33.63	572.07	398.42	23.02
1172	468	37.09		560.33	393.25	18.03	474.62	33.74	573.38	397.59	23.22
1173	472.39	37.09		564.73	393.25	18.03	475.04	33.46	574.08	397.54	23.2
1174	473.86	37.09		566.2	393.25	18.03	478.61	34.51	576.91	400.13	23.1
1175	475.32	37.09		567.66	393.25	18.03	479.81	34.19	578.88	399.2	23.39
1176	476.79	37.09		570.59	393.25	18.03	488.19	33.65	590.58	396.42	25.54
1177	479.72	37.09		574.99	393.25	18.03	488.19	33.65	590.58	396.42	25.54
1178	481.19	37.09		576.45	393.25	18.03	488.19	33.65	590.58	396.42	25.54
1179	484.12	37.09		577.92	393.25	18.03	490.56	34.31	592.84	397.02	25.64
1180	485.58	37.09		580.85	393.25	18.03	489.29	34.24	591.86	396.84	25.65
1181	488.51	37.09		583.78	393.25	18.03	493.36	34.06	594.71	397.05	25.36
1182	489.98	37.09		586.71	393.25	18.03	494.51	32.83	597.22	396.87	25.32
1183	491.45	37.09		588.18	393.25	18.03	502.1	35.25	604.16	396.23	26.01
1184	492.91	37.09		591.11	393.25	18.03	502.1	35.25	604.16	396.23	26.01
1185	497.31	37.09		594.04	391.78	18.03	506.35	35.35	610.02	396.7	26.71
1186	498.77	37.09		596.97	391.78	18.03	506.39	35.37	610.11	396.69	26.65
1187	500.24	37.09		598.44	391.78	18.03	506.39	35.37	610.11	396.69	26.65
1188	501.71	37.09		599.91	391.78	18.03	507.23	34.46	613.63	395.2	28.1
1189	504.64	37.09		604.3	391.78	18.03	514.77	34.1	616.25	397.89	26.07
1190	506.1	37.09		605.77	391.78	18.03	514.77	34.1	616.25	397.89	26.07
1191	509.03	37.09		608.7	391.78	18.03	514.77	34.1	616.25	397.89	26.07
1192	510.5	37.09		610.17	391.78	18.03	514.77	34.1	616.25	397.89	26.07
1193	513.43	37.09		614.56	391.78	18.03	514.77	34.1	616.25	397.89	26.07
1194	514.9	37.09		616.03	391.78	18.03	526.38	34.29	630.08	398.9	25.88
1195	516.36	37.09		618.96	391.78	18.03	528.74	33.73	632.88	398.15	26.54
1196	517.83	37.09		620.43	391.78	18.03	528.45	33.75	632.57	398.11	26.48
1197	522.22	37.09		624.82	391.78	18.03	527.11	34.73	635.6	394.87	28.91
1198	523.69	37.09		626.29	391.78	18.03	527.11	34.73	635.6	394.87	28.91
1199	525.16	37.09		627.75	391.78	18.03	527.11	34.73	635.6	394.87	28.91
1200	526.62	37.09		630.68	391.78	18.03	527.11	34.73	635.6	394.87	28.91
1201	529.55	37.09		633.62	390.31	18.03	531.99	34.67	640.15	393.34	30.02
1202	531.02	37.09		635.08	390.31	37.09	533.43	35.07	642.97	393.37	30.53
1203	532.48	37.09		638.01	390.31	37.09	537.39	34.26	649.45	395.78	35.92
1204	533.95	37.09		639.48	390.31	37.09	537.39	34.26	649.45	395.78	35.92
1205	538.35	37.09		643.88	390.31	37.09	537.39	34.26	649.45	395.78	35.92
1206	539.81	37.09		645.34	390.31	37.09	537.39	34.26	649.45	395.78	35.92
1207	541.28	37.09		646.81	390.31	37.09	543.43	35.03	655.2	395.73	35.55
1208	542.74	37.09		649.74	390.31	37.09	543.43	35.03	655.2	395.73	35.55
1209	545.68	37.09		654.14	390.31	37.09	552.46	34.85	663.43	391.53	36.57
1210	547.14	37.09		655.6	390.31	37.09	552.46	34.85	663.43	391.53	36.57
1211	550.07	37.09		657.07	390.31	37.09	552.46	34.85	663.43	391.53	36.57
1212	551.54	37.09		660	390.31	37.09	552.46	34.85	663.43	391.53	36.57
1213	554.47	37.09		662.93	388.85	37.09	552.46	34.85	663.43	391.53	36.57
1214	555.94	37.09		665.86	388.85	37.09	562.17	35.72	677.68	391.35	38.64
1215	557.4	37.09		667.33	388.85	37.09	559.6	36.08	672.92	390.67	37.83
1216	558.87	37.09		668.79	388.85	37.09	562.17	35.72	677.68	391.35	38.64
1217	563.26	37.09		673.19	388.85	37.09	562.17	35.72	677.68	391.35	38.64
1218	564.73	37.09		674.65	388.85	37.09	562.17	35.72	677.68	391.35	38.64
1219	566.2	37.09		677.59	388.85	37.09	562.17	35.72	677.68	391.35	38.64
1220	567.66	37.09		679.05	388.85	37.09	562.17	35.72	677.68	391.35	38.64
1221	570.59	37.09		683.45	388.85	37.09	567.95	34.88	684.06	389.99	36.74
1222	572.06	37.09		684.91	388.85	37.09	570.21	33.92	685.94	389.67	37.33
1223	573.52	37.09		686.38	388.85	37.09	570.11	33.84	685.81	389.71	37.42
1224	576.45	37.09		689.31	388.85	37.09	576.51	33.99	691.15	390.13	37.94
1225	579.39	37.09		692.24	388.85	37.09	576.51	33.99	691.15	390.13	37.94
1226	580.85	37.09		695.17	388.85	37.09	576.51	33.99	691.15	390.13	37.94
1227	582.32	37.09		696.64	388.85	37.09	576.51	33.99	691.15	390.13	37.94
1228	583.78	37.09		698.11	388.85	37.09	577.23	33.7	692.35	390.9	38.05
1229	586.71	37.09		702.5	387.38	37.09	590.69	35.21	704.85	393.06	36.88
1230	588.18	37.09		703.97	387.38	37.09	598.08	34.46	714.63	392.67	37.94
1231	591.11	37.09		706.9	387.38	37.09	601.17	35.71	718.21	394.11	38.01
1232	592.58	37.09		708.37	387.38	37.09	601.17	35.71	718.21	394.11	38.01
1233	595.51	37.09		712.76	387.38	37.09	601.17	35.71	718.21	394.11	38.01
1234	596.97	37.09		714.23	387.38	37.09	601.17	35.71	718.21	394.11	38.01
1235	598.44	37.09		715.69	387.38	37.09	603.87	35.1	721.69	393.58	38.26
1236	599.91	37.09		718.63	387.38	37.09	603.87	35.1	721.69	393.58	38.26
1237	602.84	37.09		721.56	387.38	37.09	606.69	33.7	725.47	395.24	40.68
1238	605.77	37.09		724.49	387.38	37.09	613.99	34.17	739.37	393.37	42.64
1239	607.23	37.09		725.95	387.38	37.09	613.99	34.17	739.37	393.37	42.64
1240	608.7	37.09		727.42	387.38	37.09	613.99	34.17	739.37	393.37	42.64
1241	611.63	37.09		731.82	387.38	37.09	627.61	37.7	753.56	392.71	39.92
1242	613.1	37.09		733.28	387.38	37.09	622.76	36.8	749.28	391.58	40.37
1243	614.56	37.09		736.21	387.38	37.09	620.77	36.25	746.9	391.46	40.43
1244	616.03	37.09		737.68	387.38	37.09	625.12	36.74	750	393.43	39.25
1245	620.43	37.09		742.08	385.92	37.09	625.12	36.74	750	393.43	39.25
1246	621.89	35.62		743.54	385.92	35.62	625.12	36.74	750	393.43	39.25
1247	623.36	35.62		745.01	385.92	35.62	625.12	36.74	750	393.43	39.25
1248	624.82	35.62		747.94	385.92	35.62	626.62	37.3	751.9	394.11	39.93
1249	627.75	35.62		750.87	385.92	35.62	639.96	35.45	766.15	391.69	38.67
1250	629.22	35.62		753.8	385.92	35.62	639.96	35.45	766.15	391.69	38.67
1251	630.68	35.62		755.27	385.92	35.62	638.13	36.06	763.69	390.8	38.64
1252	632.15	35.62		756.73	385.92	35.62	639.24	35.95	765.8	390.78	38.54
1253	636.55	35.62		761.13	385.92	35.62	651.39	35.87	780.47	391.59	37.58
1254	638.01	35.62		762.6	385.92	35.62	651.39	35.87	780.47	391.59	37.58
1255	639.48	35.62		765.53	385.92	35.62	650.25	35.61	777.82	391.97	38.21
1256	640.94	35.62		766.99	385.92	35.62	650.25	35.61	777.82	391.97	38.21
1257	643.88	35.62		769.92	385.92	35.62	640.56	37.04	768.7	389.24	37.13
1258	645.34	35.62		772.85	385.92	35.62	640.72	37	768.6	389.3	37.01
1259	646.81	35.62		774.32	385.92	35.62	640.72	37	768.6	389.3	37.01
1260	648.27	35.62		775.79	385.92	35.62	652.65	37.7	783.53	389.21	35.09
1261	652.67	35.62		780.18	384.45	35.62	651.33	37.41	783.59	389.23	35.48
1262	654.14	35.62		781.65	384.45	35.62	651.33	37.41	783.59	389.23	35.48
1263	655.6	35.62		784.58	384.45	35.62	671.6	36.23	807.04	392.04	35
1264	657.07	35.62		786.05	384.45	35.62	671.6	36.23	807.04	392.04	35
1265	660	35.62		790.44	384.45	35.62	674.17	35.27	807.99	394.16	35.52
1266	661.46	35.62		791.91	384.45	35.62	674.75	35.11	808.67	394.22	35.9
1267	662.93	35.62		793.37	384.45	35.62	674.75	35.11	808.67	394.22	35.9
1268	664.4	35.62		796.31	384.45	35.62	677.55	34.71	810.04	394.69	36.26
1269	668.79	35.62		799.24	384.45	35.62	674.65	35.73	812.18	389.5	38.54
1270	670.26	35.62		800.7	384.45	35.62	674.65	35.73	812.18	389.5	38.54
1271	671.72	35.62		803.63	384.45	35.62	674.65	35.73	812.18	389.5	38.54
1272	673.19	35.62		805.1	384.45	35.62	675.51	35.53	813.46	390.36	38.93
1273	676.12	35.62		809.5	384.45	35.62	675.04	35.55	813.21	390.12	38.8
1274	677.59	35.62		810.96	384.45	35.62	685.31	35.87	819.81	391.65	40.07
1275	679.05	35.62		812.43	384.45	35.62	683.53	36.15	819.68	391.62	40.03
1276	680.52	35.62		815.36	384.45	35.62	683.53	36.15	819.68	391.62	40.03
1277	684.91	35.62		818.29	382.99	35.62	690.57	37.79	830.57	391.25	38.47
1278	686.38	35.62		821.22	382.99	35.62	690.57	37.79	830.57	391.25	38.47
1279	687.85	35.62		822.69	382.99	35.62	692.42	38.12	829.85	391.41	38.94
1280	689.31	35.62		824.15	382.99	35.62	692.97	38.3	830.61	391.37	39.2
1281	692.24	35.62		825.62	384.45	35.62	689.49	37.44	828.09	393.07	40.35
1282	693.71	35.62		825.62	387.38	35.62	690.88	37.81	829.05	393.26	40.63
1283	695.17	35.62		825.62	388.85	35.62	703.28	35.06	834.85	399.26	40.22
1284	696.64	35.62		825.62	390.31	35.62	703.28	35.06	834.85	399.26	40.22
1285	699.57	35.62		825.62	394.71	35.62	703.28	35.06	834.85	399.26	40.22
1286	702.5	35.62		825.62	396.18	35.62	703.28	35.06	834.85	399.26	40.22
1287	703.97	35.62		825.62	397.64	35.62	703.28	35.06	834.85	399.26	40.22
1288	705.43	35.62		825.62	400.57	35.62	703.77	35.41	834.16	400.17	39.35
1289	708.37	35.62		824.15	403.51	35.62	708.92	34.84	833.06	409.54	38.36
1290	709.83	35.62		824.15	404.97	35.62	708.92	34.84	833.06	409.54	38.36
1291	711.3	35.62		824.15	407.9	35.62	708.92	34.84	833.06	409.54	38.36
1292	712.76	35.62		824.15	409.37	35.62	708.92	34.84	833.06	409.54	38.36
1293	715.69	35.62		824.15	412.3	35.62	708.92	34.84	833.06	409.54	38.36
1294	717.16	35.62		824.15	415.23	35.62	724.84	35.68	831.96	422.49	36.84
1295	718.63	35.62		824.15	416.7	35.62	724.44	34.5	831.46	422.4	36.31
1296	721.56	35.62		822.69	418.16	35.62	724.7	34.52	831.67	422.52	36.28
1297	724.49	35.62		822.69	422.56	35.62	724.84	35.68	831.96	422.49	36.84
1298	725.95	35.62		822.69	424.02	35.62	724.84	35.68	831.96	422.49	36.84
1299	727.42	35.62		822.69	425.49	35.62	724.84	35.68	831.96	422.49	36.84
1300	728.88	35.62		822.69	426.96	35.62	724.84	35.68	831.96	422.49	36.84
1301	731.82	35.62		822.69	431.35	35.62	724.44	34.5	831.46	422.4	36.31
1302	733.28	35.62		822.69	432.82	35.62	724.7	34.52	831.67	422.52	36.28
1303	734.75	35.62		822.69	434.28	35.62	747.09	33.5	828.79	440.65	33.55
1304	736.21	35.62		821.22	437.22	35.62	745.83	33.85	828.79	439.02	34.01
1305	740.61	35.62		821.22	440.15	35.62	742.94	34.63	829.02	437.54	32.82
1306	742.08	35.62		821.22	441.61	35.62	742.94	34.63	829.02	437.54	32.82
1307	743.54	35.62		821.22	444.54	35.62	742.94	34.63	829.02	437.54	32.82
1308	745.01	35.62		821.22	446.01	35.62	743.13	34.35	827.47	438.42	32.78
1309	747.94	35.62		821.22	448.94	35.62	747.77	34.29	823.95	445.25	38.23
1310	749.4	35.62		821.22	451.87	35.62	748.32	36.27	825.88	446.34	38.43
1311	750.87	35.62		821.22	453.34	35.62	745.84	35.07	825.99	445.7	37.56
1312	752.34	35.62		819.76	454.8	35.62	745.84	35.07	825.99	445.7	37.56
1313	755.27	35.62		819.76	457.74	35.62	753.84	35.46	826.5	451.65	37.7
1314	756.73	35.62		819.76	460.67	35.62	753.84	35.46	826.5	451.65	37.7
1315	758.2	35.62		819.76	462.13	35.62	754.45	35.21	825.25	452.33	37.3
1316	761.13	35.62		819.76	463.6	35.62	754.45	35.21	825.25	452.33	37.3
1317	764.06	35.62		819.76	468	35.62	753.58	34.05	825.25	459.21	36.72
1318	765.53	35.62		819.76	469.46	35.62	753.44	34.03	825.26	459.08	36.78
1319	766.99	35.62		819.76	470.93	35.62	764.87	31.9	826.93	460.08	37.37
1320	768.46	35.62		818.29	472.39	35.62	764.87	31.9	826.93	460.08	37.37
1321	771.39	35.62		818.29	476.79	35.62	766.04	31.55	827.32	461.27	38.4
1322	790.44	35.62		818.29	478.25	35.62	783.45	32.55	826.43	469.78	34.68
1323	791.91	35.62		818.29	479.72	35.62	783.45	32.55	826.43	469.78	34.68
1324	793.37	35.62		816.83	481.19	35.62	783.45	32.55	826.43	469.78	34.68
1325	796.31	35.62		816.83	485.58	35.62	781.84	32.37	828.36	468.12	34.18
1326	797.77	35.62		816.83	487.05	35.62	781.84	32.37	828.36	468.12	34.18
1327	799.24	35.62		816.83	488.51	35.62	797.4	33.85	824.77	478.98	32.28
1328	800.7	35.62		816.83	489.98	35.62	795.51	33.26	824.17	478.44	32.71
1329	803.63	35.62		816.83	494.38	35.62	794.58	36.53	821.79	483.68	35.68
1330	806.57	35.62		816.83	495.84	35.62	794.58	36.53	821.79	483.68	35.68
1331	808.03	35.62		816.83	497.31	35.62	794.58	36.53	821.79	483.68	35.68
1332	809.5	35.62		815.36	500.24	35.62	794.58	36.53	821.79	483.68	35.68
1333	812.43	35.62		815.36	503.17	35.62	801.86	37.43	820.44	490.73	35.33
1334	813.89	35.62		815.36	504.64	35.62	802.76	37.47	820.66	491.47	35.32
1335	815.36	35.62		815.36	507.57	35.62	802.76	37.47	820.66	491.47	35.32
1336	816.83	35.62		815.36	509.03	35.62	803.72	36.48	822.54	491.8	36.11
1337	819.76	35.62		815.36	511.97	35.62	837.98	37.26	823.14	522.95	34.27
1338	821.22	35.62		815.36	513.43	35.62	837.98	37.26	823.14	522.95	34.27
1339	822.69	35.62		815.36	516.36	35.62	837.98	37.26	823.14	522.95	34.27
1340	824.15	35.62		813.89	517.83	35.62	837.98	37.26	823.14	522.95	34.27
1341	827.08	35.62		813.89	520.76	35.62	849.33	40.96	821.17	535.69	33.91
1342	828.55	35.62		813.89	523.69	35.62	846.33	40.24	821.34	532.51	33.85
1343	831.48	35.62		813.89	525.16	35.62	846.51	38.03	816.03	539.72	34.95
1344	832.95	35.62		813.89	526.62	35.62	846.51	38.03	816.03	539.72	34.95
1345	835.88	35.62		813.89	529.55	35.62	846.51	38.03	816.03	539.72	34.95
1346	837.34	35.62		813.89	532.48	35.62	846.51	38.03	816.03	539.72	34.95
1347	838.81	35.62		813.89	533.95	35.62	846.51	38.03	816.03	539.72	34.95
1348	840.28	35.62		812.43	535.42	35.62	853.89	36.51	815.54	548.73	34.81
1349	843.21	35.62		812.43	539.81	35.62	846.51	38.03	816.03	539.72	34.95
1350	844.67	35.62		812.43	541.28	35.62	846.51	38.03	816.03	539.72	34.95
1351	846.14	35.62		812.43	542.74	35.62	846.51	38.03	816.03	539.72	34.95
1352	847.6	35.62		812.43	544.21	35.62	846.51	38.03	816.03	539.72	34.95
1353	850.54	35.62		812.43	548.61	35.62	846.51	38.03	816.03	539.72	34.95
1354	852	35.62		812.43	550.07	35.62	846.51	38.03	816.03	539.72	34.95
1355	853.47	35.62		812.43	551.54	35.62	853.89	36.51	815.54	548.73	34.81
1356	854.93	35.62		810.96	553	35.62	853.89	36.51	815.54	548.73	34.81
1357	859.33	35.62		810.96	557.4	35.62	863.05	35.21	814.86	555.19	33.35
1358	860.8	35.62		810.96	558.87	35.62	872.73	32.99	812.74	565.36	32.95
1359	862.26	35.62		810.96	560.33	35.62	872.73	32.99	812.74	565.36	32.95
1360	863.73	35.62		810.96	561.8	35.62	872.73	32.99	812.74	565.36	32.95
1361	866.66	35.62		810.96	566.2	35.62	868.13	32.77	813.27	560.6	32.51
1362	868.12	35.62		810.96	567.66	35.62	874.82	34.34	812.89	566.4	35.92
1363	869.59	35.62		810.96	569.13	35.62	874.82	34.34	812.89	566.4	35.92
1364	871.06	35.62		809.5	570.59	35.62	872.69	36.05	815.58	564.86	35.85
1365	873.99	35.62		809.5	574.99	35.62	872.68	35.39	815.07	564.61	35.84
1366	875.45	35.62		809.5	576.45	35.62	873.5	32.36	813.82	565.37	34.82
1367	876.92	35.62		809.5	577.92	35.62	873.5	32.36	813.82	565.37	34.82
1368	878.38	35.62		809.5	580.85	35.62	876.46	32.85	814.25	569.26	35.21
1369	881.31	35.62		809.5	583.78	35.62	893.81	34.54	812.55	590.55	34.4
1370	882.78	35.62		809.5	585.25	35.62	893.81	34.54	812.55	590.55	34.4
1371	884.25	35.62		809.5	586.71	35.62	897.98	33.9	812.51	592.67	34.88
1372	885.71	35.62		808.03	589.65	35.62	897.98	33.9	812.51	592.67	34.88
1373	888.64	35.62		808.03	592.58	35.62	895.16	36.05	810.6	589.8	33.93
1374	891.57	35.62		808.03	594.04	35.62	895.16	36.05	810.6	589.8	33.93
1375	893.04	35.62		808.03	595.51	35.62	893.9	35.46	811.93	588.3	34.46
1376	894.51	35.62		808.03	598.44	35.62	893.9	35.46	811.93	588.3	34.46
1377	897.44	35.62		808.03	601.37	35.62	895.54	37.67	814.19	590.44	33.99
1378	898.9	35.62		808.03	602.84	35.62	890.18	35.11	813.61	585.35	34.85
1379	900.37	35.62		808.03	604.3	35.62	890.6	34.75	813.69	586.29	34.81
1380	901.83	35.62		806.57	607.23	35.62	890.6	34.75	813.69	586.29	34.81
1381	904.77	35.62		806.57	610.17	35.62	902.97	34.79	816.38	596.15	33.37
1382	906.23	35.62		806.57	611.63	35.62	913.55	36.28	813.86	610.82	33
1383	907.7	35.62		806.57	613.1	35.62	913.55	36.28	813.86	610.82	33
1384	909.16	35.62		806.57	616.03	35.62	913.55	36.28	813.86	610.82	33
1385	912.09	35.62		806.57	618.96	35.62	911.46	36.3	814.96	610.92	32.83
1386	913.56	35.62		806.57	620.43	35.62	909.63	36.43	815.38	608.51	33.02
1387	915.03	35.62		806.57	621.89	35.62	909.63	36.43	815.38	608.51	33.02
1388	916.49	35.62		806.57	624.82	35.62	909.32	34.37	815.16	613.7	34.2
1389	919.42	35.62		805.1	627.75	35.62	912.6	35.19	814.98	615.19	33.26
1390	920.89	35.62		805.1	629.22	35.62	930.98	33.12	808.03	626.56	33.16
1391	922.35	35.62		805.1	630.68	35.62	930.98	33.12	808.03	626.56	33.16
1392	923.82	35.62		805.1	633.62	35.62	930.98	33.12	808.03	626.56	33.16
1393	926.75	35.62		805.1	636.55	35.62	934.45	33.03	807.27	630.6	33.44
1394	929.68	35.62		805.1	638.01	35.62	934.45	33.03	807.27	630.6	33.44
1395	931.15	35.62		805.1	639.48	35.62	937.06	32.14	807.43	642.35	34.54
1396	932.61	35.62		805.1	642.41	35.62	941.69	32.44	808.23	648.14	34.78
1397	935.54	35.62		803.63	645.34	35.62	934.88	31.98	806.28	635.38	36.12
1398	937.01	35.62		803.63	646.81	35.62	934.88	31.98	806.28	635.38	36.12
1399	938.48	35.62		803.63	648.27	35.62	934.88	31.98	806.28	635.38	36.12
1400	939.94	35.62		803.63	651.2	35.62	934.88	31.98	806.28	635.38	36.12
1401	942.87	35.62		803.63	654.14	35.62	941.87	32.92	808.33	642.04	35.04
1402	944.34	35.62		803.63	655.6	35.62	941.19	31.71	810.97	641.85	34.98
1403	945.8	35.62		803.63	657.07	35.62	949.42	30.58	809.63	650.74	36.03
1404	947.27	35.62		803.63	660	35.62	949.42	30.58	809.63	650.74	36.03
1405	950.2	35.62		802.17	662.93	35.62	949.42	30.58	809.63	650.74	36.03
1406	951.67	35.62		802.17	664.4	35.62	949.42	30.58	809.63	650.74	36.03
1407	953.13	35.62		802.17	665.86	35.62	959.67	30.86	810.7	659.88	35.33
1408	954.6	35.62		802.17	668.79	35.62	957.64	31.13	809.98	657.78	35.56
1409	957.53	35.62		802.17	671.72	35.62	957.15	29.5	806.71	670.35	35.63
1410	959	35.62		802.17	673.19	35.62	966.02	34	805.36	670.18	34.49
1411	960.46	35.62		802.17	674.65	35.62	966.02	34	805.36	670.18	34.49
1412	961.93	35.62		802.17	676.12	35.62	966.02	34	805.36	670.18	34.49
1413	964.86	35.62		800.7	680.52	35.62	966.02	34	805.36	670.18	34.49
1414	966.32	35.62		800.7	681.98	35.62	989.21	32.28	800.6	700.49	34.12
1415	967.79	35.62		800.7	683.45	35.62	989.93	33.19	802.57	699.75	33.84
1416	969.26	35.62		800.7	684.91	35.62	989.93	33.19	802.57	699.75	33.84
1417	972.19	35.62		800.7	689.31	35.62	989.21	32.28	800.6	700.49	34.12
1418	973.65	35.62		800.7	690.78	35.62	989.21	32.28	800.6	700.49	34.12
1419	975.12	35.62		800.7	692.24	35.62	989.21	32.28	800.6	700.49	34.12
1420	976.58	35.62		800.7	693.71	35.62	989.21	32.28	800.6	700.49	34.12
1421	979.51	35.62		799.24	698.11	35.62	989.93	33.19	802.57	699.75	33.84
1422	980.98	35.62		799.24	699.57	35.62	989.93	33.19	802.57	699.75	33.84
1423	983.91	35.62		799.24	701.04	35.62	994.46	34.49	802.97	700.21	34.61
1424	985.38	34.16		799.24	702.5	34.16	989.83	35.55	802.58	696.06	33.94
1425	988.31	34.16		799.24	706.9	34.16	995.49	34.76	804.11	698.94	35.59
1426	989.77	34.16		799.24	708.37	34.16	995.49	34.76	804.11	698.94	35.59
1427	991.24	34.16		799.24	709.83	34.16	995.49	34.76	804.11	698.94	35.59
1428	992.71	34.16		799.24	711.3	34.16	997.55	34.86	804.77	702.66	35.05
1429	995.64	34.16		797.77	714.23	34.16	1005.15	32.86	802.98	713.35	34.4
1430	997.1	34.16		797.77	717.16	34.16	1005.16	32.99	803.71	710.93	35.59
1431	998.57	34.16		797.77	718.63	34.16	1005.68	32.76	804.17	711.16	35.59
1432	1000.03	34.16		797.77	720.09	34.16	1005.68	32.76	804.17	711.16	35.59
1433	1002.97	34.16		797.77	723.02	34.16	1007.98	33.53	804.43	715.7	34.29
1434	1004.43	34.16		797.77	725.95	34.16	1007.98	33.53	804.43	715.7	34.29
1435	1005.9	34.16		797.77	727.42	34.16	1011.34	32.43	804.5	724.53	34.81
1436	1007.36	34.16		797.77	728.88	34.16	1011.34	32.43	804.5	724.53	34.81
1437	1010.29	34.16		797.77	731.82	34.16	1020.08	32.8	803.52	748.4	36.31
1438	1011.76	34.16		796.31	733.28	34.16	1020.08	32.8	803.52	748.4	36.31
1439	1013.23	34.16		796.31	736.21	34.16	1019.45	32.97	802.99	755.24	35.84
1440	1014.69	34.16		796.31	737.68	34.16	1019.09	33.19	803.78	751.77	36.34
1441	1016.16	34.16		796.31	740.61	34.16	1016.68	32.81	803.71	737.81	35.01
1442	1014.69	34.16		812.43	742.08	34.16	1021.99	30.62	817.25	735.41	34.48
1443	1014.69	34.16		812.43	743.54	34.16	1021.99	30.62	817.25	735.41	34.48
1444	1014.69	34.16		812.43	745.01	34.16	1021.99	30.62	817.25	735.41	34.48
1445	1014.69	34.16		812.43	749.4	34.16	1020.24	31.26	818.91	743.04	34.18
1446	1014.69	34.16		812.43	750.87	34.16	1020.08	31.32	818.96	742.17	34.2
1447	1014.69	34.16		812.43	752.34	34.16	1017.75	29.7	818.29	742.09	34.36
1448	1014.69	34.16		812.43	753.8	34.16	1018.76	30.75	819.09	744.28	33.91
1449	1014.69	34.16		812.43	758.2	34.16	1022.53	29.95	817.33	777.19	36.82
1450	1014.69	34.16		812.43	759.66	34.16	1022.53	29.95	817.33	777.19	36.82
1451	1013.23	34.16		812.43	761.13	34.16	1022.53	29.95	817.33	777.19	36.82
1452	1013.23	34.16		812.43	762.6	34.16	1022.53	29.95	817.33	777.19	36.82
1453	1013.23	34.16		812.43	766.99	34.16	1022.53	29.95	817.33	777.19	36.82
1454	1013.23	34.16		812.43	768.46	34.16	1020.24	29.8	815.68	788.37	36.2
1455	1013.23	34.16		812.43	769.92	34.16	1021.04	29.58	815.09	787.48	36.24
1456	1013.23	34.16		812.43	771.39	34.16	1015.06	32.49	817.02	781.39	37.56
1457	1013.23	34.16		810.96	775.79	34.16	1023.41	30.59	812.4	777.97	34.65
1458	1013.23	34.16		810.96	777.25	34.16	1023.41	30.59	812.4	777.97	34.65
1459	1013.23	34.16		810.96	778.72	34.16	1023.41	30.59	812.4	777.97	34.65
1460	1013.23	34.16		810.96	781.65	34.16	1023.41	30.59	812.4	777.97	34.65
1461	1013.23	34.16		810.96	784.58	34.16	1022.04	28.92	814.32	794.58	36.44
1462	1013.23	34.16		810.96	786.05	34.16	1022.17	28.73	813.33	798.97	35.43
1463	1013.23	34.16		810.96	787.51	34.16	1022.04	28.92	814.32	794.58	36.44
1464	1011.76	34.16		810.96	790.44	34.16	1022.04	28.92	814.32	794.58	36.44
1465	1011.76	34.16		810.96	793.37	34.16	1022.04	28.92	814.32	794.58	36.44
1466	1011.76	34.16		810.96	794.84	34.16	1022.04	28.92	814.32	794.58	36.44
1467	1011.76	34.16		810.96	796.31	34.16	1022.04	28.92	814.32	794.58	36.44
1468	1011.76	34.16		810.96	799.24	34.16	1022.17	28.73	813.33	798.97	35.43
1469	1011.76	34.16		810.96	802.17	34.16	1010.32	30.9	814.41	787.44	38.2
1470	1011.76	34.16		810.96	803.63	34.16	1011.51	31.75	815.86	791.35	37.26
1471	1011.76	34.16		810.96	805.1	34.16	1012.85	31.32	817.13	801.11	37.11
1472	1011.76	34.16		810.96	808.03	34.16	1012.85	31.32	817.13	801.11	37.11
1473	1011.76	34.16		809.5	810.96	34.16	1012.85	31.32	817.13	801.11	37.11
1474	1011.76	34.16		809.5	812.43	34.16	1012.85	31.32	817.13	801.11	37.11
1475	1011.76	34.16		809.5	813.89	34.16	1013.51	31.71	817.06	802.98	36.86
1476	1011.76	34.16		809.5	816.83	34.16	1013.51	31.71	817.06	802.98	36.86
1477	1010.29	34.16		809.5	819.76	34.16	1016.67	32.8	809.88	813.75	36.66
1478	1010.29	34.16		809.5	821.22	34.16	1016.17	31.28	812.56	826.59	36.2
1479	1010.29	34.16		809.5	822.69	34.16	1016.17	31.28	812.56	826.59	36.2
1480	1010.29	34.16		809.5	825.62	34.16	1016.17	31.28	812.56	826.59	36.2
1481	1010.29	34.16		809.5	828.55	34.16	1015.7	31.19	813.61	827.93	36.91
1482	1010.29	34.16		809.5	830.02	34.16	1014.74	30.63	811.71	828.08	35.93
1483	1010.29	34.16		809.5	831.48	34.16	1014.74	30.63	811.71	828.08	35.93
1484	1010.29	34.16		809.5	834.41	34.16	1013.11	30.37	811.77	834.89	36.74
1485	1010.29	34.16		809.5	837.34	34.16	1013.36	31.15	815.07	843.25	35.53
1486	1010.29	34.16		809.5	838.81	34.16	1013.36	31.15	815.07	843.25	35.53
1487	1010.29	34.16		809.5	840.28	34.16	1013.36	31.15	815.07	843.25	35.53
1488	1010.29	34.16		809.5	843.21	34.16	1012.93	29.95	814.46	848.94	36.53
1489	1008.83	34.16		808.03	846.14	34.16	1010.94	31.15	812.49	849.43	36.24
1490	1008.83	34.16		808.03	847.6	34.16	1010.94	31.15	812.49	849.43	36.24
1491	1008.83	34.16		808.03	849.07	34.16	1010.94	31.15	812.49	849.43	36.24
1492	1008.83	34.16		808.03	852	34.16	1010.59	31.07	812.86	849.75	36.39
1493	1008.83	34.16		808.03	854.93	34.16	1012.85	30.89	813.26	846.81	36.64
1494	1008.83	34.16		808.03	856.4	34.16	1012.85	30.89	813.26	846.81	36.64
1495	1008.83	34.16		808.03	857.86	34.16	1012.04	31.33	812.33	853.99	36.91
1496	1008.83	34.16		808.03	860.8	34.16	1011.92	31.27	812.06	851.6	36.97
1497	1008.83	34.16		808.03	863.73	34.16	1012.04	30.85	811.53	865.95	35.27
1498	1008.83	34.16		808.03	865.19	34.16	1012.04	30.85	811.53	865.95	35.27
1499	1008.83	34.16		808.03	866.66	34.16	1012.04	30.85	811.53	865.95	35.27
1500	1008.83	34.16		808.03	869.59	34.16	1012.49	30.77	812.15	870.92	34.84
1501	1007.36	34.16		808.03	872.52	34.16	1010.13	30.83	812.8	873.77	35.08
1502	1007.36	34.16		808.03	873.99	34.16	1010.77	31.62	813.63	880.15	35.03
1503	1007.36	34.16		808.03	875.45	34.16	1009.59	30.99	816.35	883.14	36.42
1504	1007.36	34.16		808.03	878.38	34.16	1009.59	30.99	816.35	883.14	36.42
1505	1007.36	34.16		806.57	881.31	34.16	1009.59	30.99	816.35	883.14	36.42
1506	1007.36	34.16		806.57	882.78	34.16	1009.59	30.99	816.35	883.14	36.42
1507	1007.36	34.16		806.57	884.25	34.16	1010.73	30.45	817.26	882.39	36.41
1508	1007.36	34.16		806.57	887.18	34.16	1010.77	30.47	817.28	882.62	36.34
1509	1007.36	34.16		806.57	890.11	34.16	1012.35	29.53	819.86	886.25	36.77
1510	1007.36	34.16		806.57	891.57	34.16	1011.78	30.4	809.35	900.76	37.03
1511	1007.36	34.16		806.57	893.04	34.16	1011.78	30.4	809.35	900.76	37.03
1512	1007.36	34.16		806.57	895.97	34.16	1011.78	30.4	809.35	900.76	37.03
1513	1007.36	34.16		806.57	898.9	34.16	1011.78	30.4	809.35	900.76	37.03
1514	1005.9	34.16		806.57	900.37	34.16	1009.64	30.72	810.29	904.16	36.94
1515	1005.9	34.16		806.57	901.83	34.16	1009.56	30.56	810.39	905.35	36.9
1516	1005.9	34.16		806.57	903.3	34.16	1009.72	28.22	811.6	925.82	35.91
1517	1005.9	34.16		806.57	907.7	34.16	1011.13	29.31	811.62	923.85	35.92
1518	1005.9	34.16		806.57	909.16	34.16	1011.13	29.31	811.62	923.85	35.92
1519	1005.9	34.16		806.57	910.63	34.16	1011.13	29.31	811.62	923.85	35.92
1520	1005.9	34.16		805.1	912.09	34.16	1011.13	29.31	811.62	923.85	35.92
1521	1005.9	34.16		805.1	916.49	34.16	1009.72	28.22	811.6	925.82	35.91
1522	1005.9	34.16		805.1	917.96	34.16	1009.72	28.22	811.6	925.82	35.91
1523	1005.9	34.16		805.1	919.42	34.16	1008.71	31.88	810.53	909.23	36.95
1524	1005.9	34.16		805.1	920.89	34.16	1008.84	31.08	807.47	911.79	36.56
1525	1005.9	34.16		805.1	925.28	34.16	1007.68	30.82	810.3	922.87	36.49
1526	1005.9	34.16		805.1	926.75	34.16	1007.68	30.82	810.3	922.87	36.49
1527	1004.43	34.16		805.1	928.22	34.16	1007.68	30.82	810.3	922.87	36.49
1528	1004.43	34.16		805.1	929.68	34.16	1008.06	31.76	809.55	920.74	36.83
1529	1004.43	34.16		805.1	934.08	34.16	1006.38	30.24	810.3	943.81	35.85
1530	1004.43	34.16		805.1	935.54	34.16	1007.17	31.09	809.89	940.31	35.4
1531	1004.43	34.16		805.1	937.01	34.16	1006.89	30.91	809.72	939.98	35.47
1532	1004.43	34.16		805.1	938.48	34.16	1005.19	31.22	813.55	946.97	34.74
1533	1004.43	34.16		805.1	942.87	34.16	1005.19	31.22	813.55	946.97	34.74
1534	1004.43	34.16		805.1	944.34	34.16	1005.19	31.22	813.55	946.97	34.74
1535	1004.43	34.16		805.1	945.8	34.16	1005.22	31.55	814.38	947.29	34.6
1536	1004.43	34.16		803.63	947.27	34.16	1008.67	31.34	806.96	939.27	33.78
1537	1004.43	34.16		803.63	951.67	34.16	1008.67	31.34	806.96	939.27	33.78
1538	1004.43	34.16		803.63	953.13	34.16	1007.5	30.7	807.27	946.64	34.88
1539	1004.43	34.16		803.63	954.6	34.16	1007.03	30.68	807.15	946.86	34.77
1540	1002.97	34.16		803.63	956.06	34.16	1004.24	29.51	809.55	953.39	34.81
1541	1002.97	34.16		803.63	960.46	34.16	1003.64	28.93	809.65	970.38	34.83
1542	1002.97	34.16		803.63	961.93	34.16	1003.68	29.01	809.64	970.55	34.9
1543	1002.97	34.16		803.63	963.39	34.16	1005.28	30.11	808.2	970.24	33.78
1544	1002.97	34.16		803.63	964.86	34.16	1005.28	30.11	808.2	970.24	33.78
1545	1002.97	34.16		803.63	967.79	34.16	1004	29.96	810.14	977.96	33.74
1546	1002.97	34.16		803.63	970.72	34.16	1004.03	30.03	810.08	977.16	33.73
1547	1002.97	34.16		803.63	972.19	34.16	1006.24	29.9	810.04	973.96	33.58
1548	1002.97	34.16		803.63	973.65	34.16	1007.05	30	810.32	976.41	33.29
1549	1002.97	34.16		803.63	976.58	34.16	1004.85	29.12	805.78	987.44	33.54
1550	1002.97	34.16		803.63	979.51	34.16	1004.85	29.12	805.78	987.44	33.54
1551	1002.97	34.16		803.63	980.98	34.16	1004.85	29.12	805.78	987.44	33.54
1552	1002.97	34.16		802.17	982.45	34.16	1004.85	29.12	805.78	987.44	33.54
1553	1001.5	34.16		802.17	985.38	34.16	1003.84	28.43	804.75	990.2	33.03
1554	1001.5	34.16		802.17	986.84	34.16	1004.79	27.88	808.26	991.32	32.66
1555	1001.5	34.16		802.17	989.77	34.16	1006.76	29.03	806.25	984.44	32.94
1556	1001.5	34.16		802.17	991.24	34.16	1001.03	28.22	804.31	1011.39	34.21
1557	1001.5	34.16		802.17	994.17	34.16	1001.03	28.22	804.31	1011.39	34.21
1558	1001.5	34.16		802.17	995.64	34.16	1001.03	28.22	804.31	1011.39	34.21
1559	1001.5	34.16		802.17	998.57	34.16	1001.03	28.22	804.31	1011.39	34.21
1560	1001.5	34.16		802.17	1000.03	34.16	1001.03	28.22	804.31	1011.39	34.21
1561	1001.5	34.16		802.17	1002.97	34.16	1001.56	28.58	805.68	1016.42	33.47
1562	1000.03	34.16		800.7	1020.55	34.16	1000.67	28.78	804.35	1040.12	33.04
1563	1000.03	34.16		800.7	1023.49	34.16	1000.67	28.78	804.35	1040.12	33.04
1564	1000.03	34.16		800.7	1024.95	34.16	1000.67	28.78	804.35	1040.12	33.04
1565	1000.03	34.16		800.7	1027.88	34.16	1000.67	28.78	804.35	1040.12	33.04
1566	1000.03	34.16		800.7	1029.35	34.16	1000.67	28.78	804.35	1040.12	33.04
1567	1000.03	34.16		800.7	1030.81	34.16	1000.67	28.78	804.35	1040.12	33.04
1568	1000.03	34.16		800.7	1033.74	34.16	1000.02	28.97	811.38	1054.54	32.85
1569	1000.03	34.16		800.7	1036.68	34.16	999.87	29.44	811.5	1057.9	34.03
1570	1000.03	34.16		800.7	1038.14	34.16	998.26	25.06	806.24	1072.47	35
1571	998.57	34.16		800.7	1039.61	34.16	998.26	25.06	806.24	1072.47	35
1572	998.57	34.16		800.7	1041.07	34.16	998.26	25.06	806.24	1072.47	35
1573	998.57	34.16		800.7	1045.47	34.16	998.26	25.06	806.24	1072.47	35
1574	998.57	34.16		800.7	1046.94	34.16	998.26	25.06	806.24	1072.47	35
1575	998.57	34.16		800.7	1048.4	34.16	999.03	24.7	808.41	1080.59	34.25
1576	998.57	34.16		800.7	1049.87	34.16	998.26	25.06	806.24	1072.47	35
1577	998.57	34.16		799.24	1054.26	34.16	998.26	25.06	806.24	1072.47	35
1578	998.57	34.16		799.24	1055.73	34.16	998.26	25.06	806.24	1072.47	35
1579	998.57	34.16		799.24	1057.2	34.16	998.26	25.06	806.24	1072.47	35
1580	998.57	34.16		799.24	1058.66	34.16	998.26	25.06	806.24	1072.47	35
1581	998.57	34.16		799.24	1063.06	34.16	999.03	24.7	808.41	1080.59	34.25
1582	998.57	34.16		799.24	1064.52	34.16	997.99	25.45	804.99	1077.05	37.39
1583	998.57	34.16		799.24	1065.99	34.16	997.99	25.45	804.99	1077.05	37.39
1584	997.1	34.16		799.24	1067.46	34.16	998.57	25.34	806.56	1080.92	38.38
1585	997.1	34.16		799.24	1070.39	34.16	996.38	23.24	805.82	1074.04	36.59
1586	997.1	34.16		799.24	1073.32	34.16	996.38	23.24	805.82	1074.04	36.59
1587	997.1	34.16		799.24	1074.78	34.16	996.38	23.24	805.82	1074.04	36.59
1588	997.1	34.16		799.24	1076.25	34.16	996.01	23.58	807.76	1079.72	37.53
1589	997.1	34.16		799.24	1079.18	34.16	996.43	26.72	803.12	1089.02	36.12
1590	997.1	34.16		799.24	1080.65	34.16	996.43	26.72	803.12	1089.02	36.12
1591	997.1	34.16		799.24	1083.58	34.16	996.43	26.72	803.12	1089.02	36.12
1592	997.1	34.16		799.24	1085.04	34.16	996.01	26.51	805.03	1091.2	37.11
1593	997.1	34.16		797.77	1087.97	34.16	995.03	28.17	809.33	1105.61	36.05
1594	997.1	34.16		797.77	1089.44	34.16	995.03	28.17	809.33	1105.61	36.05
1595	997.1	34.16		797.77	1090.91	34.16	994.86	27.77	810.55	1106.13	36.44
1596	997.1	34.16		797.77	1093.84	34.16	994.86	27.77	810.55	1106.13	36.44
1597	995.64	34.16		797.77	1096.77	34.16	993.2	28.63	804.5	1117.06	33.62
1598	995.64	34.16		797.77	1098.23	34.16	993.2	28.63	804.5	1117.06	33.62
1599	995.64	34.16		797.77	1099.7	34.16	993.28	28.73	803.75	1114.23	34.18
1600	995.64	34.16		797.77	1101.17	34.16	993.08	28.8	804.16	1114.64	34.27
1601	995.64	34.16		799.24	1105.56	34.16	991.85	28.41	810.87	1118.86	35.55
1602	995.64	34.16		800.7	1107.03	34.16	991.85	28.41	810.87	1118.86	35.55
1603	995.64	34.16		803.63	1108.49	34.16	994.85	30.58	820.69	1131.49	33.76
1604	995.64	34.16		805.1	1109.96	34.16	994.85	30.58	820.69	1131.49	33.76
1605	994.17	34.16		808.03	1112.89	34.16	994.85	30.58	820.69	1131.49	33.76
1606	994.17	34.16		810.96	1114.36	34.16	994.85	30.58	820.69	1131.49	33.76
1607	994.17	34.16		812.43	1115.82	34.16	994.85	30.58	820.69	1131.49	33.76
1608	994.17	34.16		813.89	1117.29	34.16	994.64	29.86	825.44	1135.74	33.79
1609	994.17	34.16		816.83	1121.69	34.16	993.89	30.52	836.53	1142.89	31.58
1610	994.17	34.16		819.76	1123.15	34.16	993.89	30.52	836.53	1142.89	31.58
1611	994.17	34.16		821.22	1124.62	34.16	993.89	30.52	836.53	1142.89	31.58
1612	992.71	34.16		822.69	1126.08	34.16	993.89	30.52	836.53	1142.89	31.58
1613	992.71	34.16		827.08	1129.01	34.16	993.89	30.52	836.53	1142.89	31.58
1614	992.71	34.16		828.55	1130.48	34.16	993.89	30.52	836.53	1142.89	31.58
1615	992.71	34.16		830.02	1131.94	34.16	993.43	30.39	837.97	1144.25	31.32
1616	992.71	34.16		831.48	1133.41	34.16	993.89	30.52	836.53	1142.89	31.58
1617	992.71	34.16		835.88	1137.81	34.16	993.89	30.52	836.53	1142.89	31.58
1618	991.24	34.16		837.34	1139.27	34.16	993.89	30.52	836.53	1142.89	31.58
1619	991.24	34.16		838.81	1140.74	34.16	993.89	30.52	836.53	1142.89	31.58
1620	991.24	34.16		840.28	1142.2	34.16	993.89	30.52	836.53	1142.89	31.58
1621	991.24	34.16		844.67	1145.14	34.16	993.43	30.39	837.97	1144.25	31.32
1622	991.24	34.16		846.14	1146.6	34.16	990.6	29.55	851.32	1158.73	33.26
1623	991.24	34.16		847.6	1148.07	34.16	990.9	30	855.31	1163.51	32.96
1624	989.77	34.16		849.07	1149.53	34.16	990.67	29.96	854.44	1162.62	33.05
1625	989.77	34.16		853.47	1152.46	34.16	990.75	29.32	858.09	1160.88	34.4
1626	989.77	34.16		854.93	1153.93	34.16	990.75	29.32	858.09	1160.88	34.4
1627	989.77	34.16		856.4	1156.86	34.16	990.75	29.32	858.09	1160.88	34.4
1628	989.77	34.16		859.33	1158.33	34.16	991.86	30.1	862.73	1165.96	33.73
1629	989.77	34.16		862.26	1161.26	34.16	985.77	28.43	868.82	1174.79	34.67
1630	988.31	34.16		863.73	1162.72	34.16	987.45	26.4	880.72	1181.07	34.43
1631	988.31	34.16		865.19	1164.19	34.16	987.57	26.32	880.79	1180.81	34.43
1632	988.31	34.16		868.12	1165.66	34.16	989.79	26.74	891.06	1185.76	35.11
1633	988.31	34.16		871.06	1168.59	34.16	989.79	26.74	891.06	1185.76	35.11
1634	988.31	34.16		872.52	1170.05	34.16	989.79	26.74	891.06	1185.76	35.11
1635	988.31	34.16		873.99	1171.52	34.16	990.31	26.89	885.57	1182.94	34.77
1636	988.31	34.16		876.92	1172.98	34.16	986.88	27.94	862.26	1168.27	33.86
1637	986.84	34.16		879.85	1177.38	34.16	987.18	28.36	871.17	1173.95	34.04
1638	986.84	34.16		881.31	1178.85	34.16	986.77	28.57	876.76	1178.77	34.31
1639	986.84	34.16		882.78	1180.31	34.16	987	32.04	869.09	1175.21	33.62
1640	986.84	34.16		885.71	1181.78	34.16	987	32.04	869.09	1175.21	33.62
1641	986.84	34.16		888.64	1184.71	34.16	985.29	30.27	877.83	1182.72	34.35
1642	986.84	34.16		890.11	1186.17	34.16	986.09	34.92	896.35	1193.28	33.7
1643	985.38	34.16		893.04	1187.64	34.16	986.09	34.92	896.35	1193.28	33.7
1644	985.38	34.16		894.51	1189.11	34.16	986.09	34.92	896.35	1193.28	33.7
1645	985.38	34.16		897.44	1192.04	34.16	985.45	33.89	890.52	1189.87	33.86
1646	985.38	34.16		898.9	1193.5	34.16	985.55	33.87	891.97	1191.17	33.74
1647	985.38	34.16		901.83	1194.97	34.16	985.94	32.55	892.12	1190.79	33.34
1648	985.38	34.16		903.3	1196.43	34.16	985.12	33.02	893.56	1192.86	33.44
1649	983.91	34.16		906.23	1200.83	34.16	983.43	31.32	910.24	1208.03	34.54
1650	983.91	34.16		907.7	1202.3	34.16	983.43	31.32	910.24	1208.03	34.54
1651	983.91	34.16		910.63	1203.76	34.16	983.43	31.32	910.24	1208.03	34.54
1652	983.91	34.16		912.09	1205.23	34.16	985.83	32.53	907.36	1205.6	34.09
1653	983.91	34.16		915.03	1208.16	34.16	984.8	30.97	910.68	1210.18	34.88
1654	983.91	34.16		916.49	1209.63	34.16	984.8	30.97	910.68	1210.18	34.88
1655	983.91	34.16		919.42	1211.09	34.16	982.34	31.6	915.13	1213.59	35.51
1656	982.45	34.16		920.89	1212.56	34.16	982.34	31.6	915.13	1213.59	35.51
1657	982.45	34.16		923.82	1215.49	34.16	982	30.84	917.71	1214.83	34.89
1658	982.45	34.16		925.28	1216.95	34.16	982	30.84	917.71	1214.83	34.89
1659	982.45	34.16		928.22	1218.42	34.16	981.63	31.66	924.93	1219.3	34.49
1660	982.45	34.16		929.68	1219.89	34.16	981.41	31.87	926.45	1220.43	34.67
1661	982.45	34.16		932.61	1224.28	34.16	984.51	31.67	930.12	1223.7	34.47
1662	980.98	34.16		934.08	1225.75	34.16	984.51	31.67	930.12	1223.7	34.47
1663	980.98	34.16		937.01	1227.21	34.16	985.23	32.46	918.86	1213.03	33.79
1664	980.98	34.16		938.48	1228.68	34.16	985.23	32.46	918.86	1213.03	33.79
1665	980.98	34.16		941.41	1231.61	34.16	986.91	33.14	924.68	1216.43	33.86
1666	980.98	34.16		942.87	1233.08	34.16	986.99	33.13	925.49	1217.07	33.8
1667	980.98	34.16		944.34	1234.54	34.16	988.35	33.31	934.36	1224.13	33.25
1668	980.98	34.16		947.27	1236.01	34.16	986.94	32.33	933.96	1224.65	33.39
1669	979.51	34.16		950.2	1238.94	34.16	979.94	33.48	937.52	1232.35	35.41
1670	979.51	34.16		951.67	1240.4	34.16	979.94	33.48	937.52	1232.35	35.41
1671	979.51	34.16		953.13	1241.87	34.16	979.94	33.48	937.52	1232.35	35.41
1672	979.51	34.16		956.06	1243.34	34.16	979.94	33.48	937.52	1232.35	35.41
1673	979.51	34.16		959	1247.73	34.16	981.22	33.87	934.08	1228.22	34.84
1674	979.51	34.16		960.46	1249.2	34.16	980.21	34.77	949.04	1240.85	36.31
1675	978.05	34.16		961.93	1250.66	34.16	980.35	36.03	944.59	1237.87	36.35
1676	978.05	34.16		964.86	1252.13	34.16	980.35	36.03	944.59	1237.87	36.35
1677	978.05	34.16		967.79	1255.06	34.16	976.6	33.58	960.61	1253.51	36.49
1678	978.05	34.16		969.26	1256.53	34.16	976.6	33.58	960.61	1253.51	36.49
1679	978.05	34.16		970.72	1257.99	34.16	976.6	33.58	960.61	1253.51	36.49
1680	978.05	34.16		972.19	1259.46	34.16	976.6	33.58	960.61	1253.51	36.49
1681	978.05	34.16		976.58	1262.39	34.16	976.24	34.29	976.96	1266.54	38.47
1682	976.58	32.69		978.05	1263.86	41.48	976.92	33.46	974.62	1265.76	38.19
1683	976.58	32.69		979.51	1265.32	41.48	976.92	33.46	974.62	1265.76	38.19
1684	976.58	32.69		980.98	1266.79	41.48	976.92	33.46	974.62	1265.76	38.19
1685	976.58	32.69		983.91	1269.72	41.48	976.92	33.46	974.62	1265.76	38.19
1686	975.12	32.69		986.84	1271.18	41.48	976.92	33.46	974.62	1265.76	38.19
1687	975.12	32.69		988.31	1272.65	41.48	976.92	33.46	974.62	1265.76	38.19
1688	975.12	32.69		989.77	1274.12	41.48	975.33	31.71	984.3	1272.93	38.66
1689	975.12	32.69		992.71	1277.05	41.48	975.86	32.13	974.71	1264.89	37.95
1690	975.12	32.69		995.64	1278.51	41.48	975.47	31.86	988.17	1276.85	38.63
1691	975.12	32.69		997.1	1279.98	41.48	975.47	31.86	988.17	1276.85	38.63
1692	975.12	32.69		998.57	1281.44	41.48	975.47	31.86	988.17	1276.85	38.63
1693	973.65	32.69		1001.5	1284.37	41.48	975.47	31.86	988.17	1276.85	38.63
1694	973.65	32.69		1002.97	1287.31	41.48	975.47	31.86	988.17	1276.85	38.63
1695	973.65	32.69		1005.9	1288.77	41.48	974.57	30.62	999.65	1285.64	38.74
1696	973.65	32.69		1007.36	1290.24	41.48	973.29	30.22	1000.21	1286.61	40
1697	973.65	32.69		1010.29	1293.17	41.48	973.02	30.09	1008.35	1292.47	39.94
1698	973.65	32.69		1011.76	1294.63	41.48	970.75	28.6	1019.07	1301.34	40.88
1699	973.65	32.69		1014.69	1296.1	41.48	970.75	28.6	1019.07	1301.34	40.88
1700	972.19	32.69		1016.16	1297.57	41.48	970.75	28.6	1019.07	1301.34	40.88
1701	972.19	32.69		1019.09	1300.5	41.48	970.81	28.78	1026.2	1307.13	41.19
1702	972.19	32.69		1020.55	1301.96	41.48	970.81	28.78	1026.2	1307.13	41.19
1703	972.19	32.69		1022.02	1303.43	41.48	973.6	31.87	1006.86	1288.1	38.88
1704	972.19	32.69		1024.95	1304.89	41.48	973.7	30.87	1012.52	1293.18	39.23
1705	972.19	32.69		1027.88	1307.83	41.48	970.31	28.87	1035.84	1311.9	40.69
1706	970.72	32.69		1029.35	1309.29	41.48	970.31	28.87	1035.84	1311.9	40.69
1707	970.72	32.69		1030.81	1310.76	41.48	970.31	28.87	1035.84	1311.9	40.69
1708	970.72	32.69		1032.28	1312.22	41.48	970.42	28.98	1037.33	1313.01	40.79
1709	970.72	32.69		1036.68	1315.15	41.48	969.3	29.38	1038.03	1317.15	41.65
1710	970.72	32.69		1038.14	1316.62	41.48	969.3	29.38	1038.03	1317.15	41.65
1711	970.72	32.69		1039.61	1318.09	41.48	971.36	29.24	1036.03	1313.4	41.59
1712	970.72	32.69		1041.07	1319.55	41.48	971.6	29.08	1037.81	1314.29	41.66
1713	969.26	32.69		1045.47	1323.95	41.48	969.58	29.18	1035.74	1314.46	41.78
1714	969.26	32.69		1046.94	1325.41	41.48	969.58	29.18	1035.74	1314.46	41.78
1715	969.26	32.69		1048.4	1326.88	41.48	970.19	29.89	1031.81	1311.82	41.96
1716	969.26	32.69		1049.87	1328.35	41.48	966.16	28.92	1051.32	1329.21	41.47
1717	969.26	32.69		1052.8	1331.28	41.48	966.16	28.92	1051.32	1329.21	41.47
1718	969.26	32.69		1055.73	1332.74	41.48	966.16	28.92	1051.32	1329.21	41.47
1719	967.79	32.69		1057.2	1334.21	41.48	963.4	28.88	1059.9	1338.91	41.17
1720	967.79	32.69		1058.66	1335.67	41.48	963.33	28.85	1059.84	1338.91	41.19
1721	967.79	32.69		1061.59	1338.6	41.48	966.66	30.01	1051.13	1326.31	42.31
1722	967.79	32.69		1063.06	1340.07	41.48	966.66	30.01	1051.13	1326.31	42.31
1723	967.79	32.69		1065.99	1341.54	41.48	963.85	31.41	1066.67	1340.9	41.23
1724	967.79	32.69		1067.46	1343	41.48	963.85	31.41	1066.67	1340.9	41.23
1725	967.79	32.69		1070.39	1345.93	41.48	963.85	31.41	1066.67	1340.9	41.23
1726	966.32	32.69		1071.85	1347.4	41.48	964.05	32.19	1076.77	1348.97	41.17
1727	966.32	32.69		1073.32	1348.86	41.48	964.44	32.22	1074.83	1347.51	41.16
1728	966.32	32.69		1074.78	1350.33	41.48	962.77	30.68	1072.1	1349.41	41.82
1729	966.32	32.69		1079.18	1353.26	41.48	964.97	28.8	1087.62	1359	42.38
1730	966.32	32.69		1080.65	1354.73	41.48	964.97	28.8	1087.62	1359	42.38
1731	966.32	32.69		1082.11	1356.19	41.48	964.97	28.8	1087.62	1359	42.38
1732	966.32	32.69		1083.58	1357.66	41.48	964.97	28.8	1087.62	1359	42.38
1733	964.86	32.69		1087.97	1360.59	41.48	965.19	28.52	1091	1360.47	42.32
1734	964.86	32.69		1089.44	1362.06	41.48	965.26	28.55	1091.62	1360.77	42.44
1735	964.86	32.69		1090.91	1363.52	41.48	965.26	28.55	1091.62	1360.77	42.44
1736	964.86	32.69		1092.37	1364.99	41.48	966.2	28.1	1090.22	1357.93	42.25
1737	964.86	32.69		1095.3	1367.92	41.48	962.35	29.66	1090.57	1368.19	42.71
1738	964.86	32.69		1098.23	1370.85	41.48	962.35	29.66	1090.57	1368.19	42.71
1739	963.39	32.69		1099.7	1372.32	41.48	962.35	29.66	1090.57	1368.19	42.71
1740	963.39	32.69		1101.17	1373.78	41.48	962.35	29.66	1090.57	1368.19	42.71
1741	963.39	32.69		1104.1	1376.71	41.48	961.68	32	1106.76	1379.39	43.52
1742	963.39	32.69		1105.56	1378.18	41.48	962.06	31.55	1105.61	1379.49	43.53
1743	963.39	32.69		1107.03	1379.64	41.48	961.68	32	1106.76	1379.39	43.52
1744	963.39	32.69		1109.96	1381.11	41.48	961.68	32	1106.76	1379.39	43.52
1745	963.39	32.69		1112.89	1384.04	41.48	961.68	32	1106.76	1379.39	43.52
1746	961.93	32.69		1114.36	1385.51	41.48	961.68	32	1106.76	1379.39	43.52
1747	961.93	32.69		1115.82	1386.97	41.48	961.68	32	1106.76	1379.39	43.52
1748	961.93	32.69		1117.29	1388.44	41.48	962.06	31.55	1105.61	1379.49	43.53
1749	961.93	32.69		1121.69	1391.37	41.48	960.79	31.13	1132.16	1399.28	42.35
1750	961.93	32.69		1123.15	1392.83	41.48	961.71	31.09	1133.67	1399.29	42.32
1751	961.93	32.69		1124.62	1394.3	41.48	961.71	31.09	1133.67	1399.29	42.32
1752	961.93	32.69		1126.08	1395.77	41.48	960.81	30.73	1139.09	1402.87	43.24
1753	960.46	32.69		1129.01	1398.7	41.48	960.81	30.73	1139.09	1402.87	43.24
1754	960.46	32.69		1130.48	1400.16	41.48	960.81	30.73	1139.09	1402.87	43.24
1755	960.46	32.69		1133.41	1401.63	41.48	961.16	30.98	1141.6	1404.73	43.09
1756	960.46	32.69		1134.88	1403.09	41.48	961.24	30.88	1141.95	1405.32	43.06
1757	960.46	32.69		1137.81	1406.03	41.48	970.8	33.59	1149.49	1401.44	41.63
1758	960.46	32.69		1139.27	1407.49	41.48	962.71	30.71	1151.15	1411.51	42.58
1759	960.46	32.69		1140.74	1408.96	41.48	962.71	30.71	1151.15	1411.51	42.58
1760	959	32.69		1142.2	1410.42	41.48	962.71	30.71	1151.15	1411.51	42.58
1761	960.46	32.69		1146.6	1411.89	41.48	963.28	30.76	1155.39	1414.2	42.56
1762	961.93	32.69		1148.07	1411.89	41.48	963.28	30.76	1155.39	1414.2	42.56
1763	963.39	32.69		1149.53	1411.89	41.48	970.73	31.96	1158.13	1408.24	41.92
1764	964.86	32.69		1151	1410.42	41.48	970.06	31.54	1158.84	1409.22	42.27
1765	967.79	32.69		1155.4	1410.42	41.48	972.91	31.92	1166.82	1410.06	40.46
1766	969.26	32.69		1156.86	1410.42	41.48	972.91	31.92	1166.82	1410.06	40.46
1767	970.72	32.69		1158.33	1410.42	41.48	972.91	31.92	1166.82	1410.06	40.46
1768	972.19	32.69		1159.79	1410.42	41.48	974.09	31.89	1165.45	1408.51	40.23
1769	975.12	32.69		1162.72	1408.96	41.48	977.19	32.12	1171.56	1414.16	41.55
1770	976.58	32.69		1164.19	1408.96	41.48	977.19	32.12	1171.56	1414.16	41.55
1771	978.05	32.69		1167.12	1408.96	41.48	977.19	32.12	1171.56	1414.16	41.55
1772	979.51	32.69		1168.59	1408.96	41.48	984.48	33.22	1179.65	1412.34	41.26
1773	982.45	32.69		1171.52	1407.49	41.48	984.48	33.22	1179.65	1412.34	41.26
1774	983.91	32.69		1172.98	1407.49	41.48	983.76	31.55	1177.42	1412.11	40.23
1775	983.91	32.69		1174.45	1407.49	41.48	990.38	33.22	1185.99	1411.64	39.35
1776	985.38	32.69		1175.92	1407.49	41.48	990.38	33.22	1185.99	1411.64	39.35
1777	988.31	32.69		1180.31	1407.49	41.48	989.69	34.24	1181.38	1409.97	44.6
1778	989.77	32.69		1181.78	1406.03	41.48	993	33.69	1185.85	1409.77	43.09
1779	991.24	32.69		1183.24	1406.03	41.48	993.12	33.71	1186.08	1409.88	43.1
1780	992.71	32.69		1184.71	1406.03	41.48	993.12	33.71	1186.08	1409.88	43.1
1781	995.64	32.69		1187.64	1406.03	41.48	999.07	35.42	1184.64	1401.07	43.89
1782	997.1	32.69		1189.11	1406.03	41.48	1000.6	35.07	1191.63	1409.02	41.05
1783	998.57	32.69		1192.04	1404.56	41.48	1000.6	35.07	1191.63	1409.02	41.05
1784	1000.03	32.69		1193.5	1404.56	41.48	1000.6	35.07	1191.63	1409.02	41.05
1785	1002.97	32.69		1196.43	1404.56	41.48	1000.6	35.07	1191.63	1409.02	41.05
1786	1004.43	32.69		1197.9	1404.56	41.48	1004.25	35.75	1199.59	1409.77	41.17
1787	1005.9	32.69		1199.37	1404.56	41.48	1003.07	35.5	1197.86	1410.13	41.24
1788	1007.36	32.69		1200.83	1403.09	41.48	1003.07	35.5	1197.86	1410.13	41.24
1789	1010.29	32.69		1205.23	1403.09	41.48	1006.63	35.71	1199.83	1406.14	39.33
1790	1011.76	32.69		1206.69	1403.09	41.48	1021.63	34.28	1217.02	1405.01	36.12
1791	1011.76	32.69		1208.16	1403.09	41.48	1021.63	34.28	1217.02	1405.01	36.12
1792	1013.23	32.69		1209.63	1403.09	40.02	1021.63	34.28	1217.02	1405.01	36.12
1793	1016.16	32.69		1212.56	1401.63	40.02	1023.89	33.47	1222.06	1406.27	35.73
1794	1017.62	32.69		1215.49	1401.63	40.02	1023.76	33.39	1221.8	1406.11	35.8
1795	1019.09	32.69		1216.95	1401.63	40.02	1023.76	33.39	1221.8	1406.11	35.8
1796	1020.55	32.69		1218.42	1401.63	40.02	1026.17	37.48	1222.44	1404.95	37.54
1797	1023.49	32.69		1221.35	1400.16	40.02	1031.49	39.8	1234.08	1404.06	37.74
1798	1024.95	32.69		1222.82	1400.16	40.02	1031.49	39.8	1234.08	1404.06	37.74
1799	1026.42	32.69		1224.28	1400.16	40.02	1031.49	39.8	1234.08	1404.06	37.74
1800	1027.88	32.69		1225.75	1400.16	40.02	1031.49	39.8	1234.08	1404.06	37.74
1801	1030.81	32.69		1230.14	1400.16	40.02	1034.95	39.82	1236.64	1401.72	37.49
1802	1030.81	48.81		1230.14	1398.7	40.02	1033.6	42.6	1236.14	1400.49	38.63
1803	1032.28	48.81		1231.61	1398.7	40.02	1033.6	42.6	1236.14	1400.49	38.63
1804	1033.74	48.81		1233.08	1397.23	40.02	1033.6	42.6	1236.14	1400.49	38.63
1805	1036.68	48.81		1237.47	1397.23	40.02	1033.6	42.6	1236.14	1400.49	38.63
1806	1038.14	48.81		1238.94	1397.23	40.02	1033.6	42.6	1236.14	1400.49	38.63
1807	1039.61	48.81		1240.4	1397.23	40.02	1033.6	42.6	1236.14	1400.49	38.63
1808	1041.07	48.81		1241.87	1397.23	40.02	1031	43.6	1230.94	1400.06	39.65
1809	1044	48.81		1244.8	1395.77	40.02	1045.49	46	1245.36	1397.03	40.06
1810	1045.47	48.81		1246.27	1395.77	40.02	1045.33	46.03	1245.34	1397.23	40.08
1811	1045.47	48.81		1247.73	1395.77	40.02	1053.41	45.68	1256.39	1396.66	40.18
1812	1046.94	48.81		1250.66	1395.77	40.02	1053.41	45.68	1256.39	1396.66	40.18
1813	1049.87	48.81		1253.6	1394.3	40.02	1053.41	45.68	1256.39	1396.66	40.18
1814	1051.33	48.81		1255.06	1394.3	40.02	1053.41	45.68	1256.39	1396.66	40.18
1815	1052.8	48.81		1256.53	1394.3	40.02	1057.08	46.66	1259.91	1396.13	40.39
1816	1054.26	48.81		1257.99	1394.3	40.02	1050.36	47.08	1252.03	1396.25	41.99
1817	1057.2	48.81		1260.92	1394.3	40.02	1054.82	47.27	1259.72	1395.24	40.55
1818	1058.66	48.81		1263.86	1392.83	40.02	1054.82	47.27	1259.72	1395.24	40.55
1819	1060.13	48.81		1265.32	1392.83	40.02	1059.01	45.12	1262.11	1396.02	42.17
1820	1061.59	48.81		1266.79	1392.83	40.02	1059.01	45.12	1262.11	1396.02	42.17
1821	1064.52	48.81		1269.72	1392.83	40.02	1059	45.5	1261.69	1396.37	42.71
1822	1065.99	48.81		1271.18	1392.83	40.02	1063.46	49.28	1268.2	1399.35	43.06
1823	1067.46	48.81		1272.65	1392.83	40.02	1063.46	49.28	1268.2	1399.35	43.06
1824	1067.46	48.81		1274.12	1391.37	40.02	1074.46	50.11	1282.39	1399.54	43.77
1825	1070.39	48.81		1278.51	1391.37	40.02	1069.98	49.34	1277.9	1399.51	43.73
1826	1071.85	48.81		1279.98	1391.37	40.02	1076.34	48.98	1285.93	1401.21	43.52
1827	1073.32	48.81		1281.44	1391.37	40.02	1076.34	48.98	1285.93	1401.21	43.52
1828	1074.78	48.81		1282.91	1391.37	40.02	1079.3	48.61	1285.36	1400.33	42.96
1829	1077.71	48.81		1285.84	1389.9	40.02	1084.18	47.47	1291.52	1392.52	39.5
1830	1079.18	48.81		1287.31	1389.9	40.02	1084.18	47.47	1291.52	1392.52	39.5
1831	1080.65	48.81		1288.77	1389.9	40.02	1084.18	47.47	1291.52	1392.52	39.5
1832	1082.11	48.81		1291.7	1389.9	40.02	1077.73	47.3	1283.11	1393.14	40.06
1833	1085.04	48.81		1294.63	1388.44	40.02	1080.88	47.42	1287.49	1393.21	39.79
1834	1086.51	48.81		1296.1	1388.44	40.02	1090.99	47.55	1298.16	1391.69	40.47
1835	1086.51	48.81		1297.57	1388.44	40.02	1086.14	48.42	1293.42	1392.96	41.71
1836	1087.97	48.81		1299.03	1388.44	40.02	1086.24	48.43	1293.58	1392.96	41.66
1837	1090.91	48.81		1301.96	1388.44	40.02	1105.34	48.99	1315.51	1387.23	39.27
1838	1092.37	48.81		1303.43	1386.97	40.02	1105.34	48.99	1315.51	1387.23	39.27
1839	1093.84	48.81		1306.36	1386.97	40.02	1102.39	48.39	1311.01	1388.78	39.04
1840	1095.3	48.81		1307.83	1386.97	40.02	1103.49	48.3	1312.61	1389.02	38.98
1841	1098.23	48.81		1310.76	1386.97	40.02	1113.22	48.59	1324.7	1388.07	40.36
1842	1099.7	48.81		1312.22	1386.97	40.02	1112.73	48.18	1325.58	1389.1	40.43
1843	1101.17	48.81		1313.69	1385.51	40.02	1116.13	49.93	1326.15	1386.47	38.84
1844	1102.63	48.81		1315.15	1385.51	40.02	1116.13	49.93	1326.15	1386.47	38.84
1845	1105.56	48.81		1318.09	1385.51	40.02	1116.13	49.93	1326.15	1386.47	38.84
1846	1105.56	48.81		1321.02	1385.51	40.02	1116.13	49.93	1326.15	1386.47	38.84
1847	1107.03	48.81		1322.48	1385.51	40.02	1121.6	49.46	1333.82	1386.22	40.81
1848	1108.49	48.81		1323.95	1385.51	40.02	1121.92	49.48	1334.22	1386.02	40.68
1849	1111.43	48.81		1326.88	1384.04	40.02	1122.38	48.14	1335.65	1387.11	40.25
1850	1112.89	48.81		1328.35	1384.04	40.02	1130.22	49.51	1339.82	1385.77	42.18
1851	1114.36	48.81		1329.81	1384.04	40.02	1130.22	49.51	1339.82	1385.77	42.18
1852	1115.82	48.81		1331.28	1384.04	40.02	1130.22	49.51	1339.82	1385.77	42.18
1853	1118.75	48.81		1334.21	1382.57	40.02	1132.27	49.19	1342.72	1385.14	42.01
1854	1120.22	48.81		1337.14	1382.57	40.02	1133	48.88	1343.62	1385.45	42.08
1855	1121.69	48.81		1338.6	1382.57	40.02	1133	48.88	1343.62	1385.45	42.08
1856	1123.15	48.81		1340.07	1382.57	40.02	1121.01	48.74	1329.49	1385.5	40.35
1857	1124.62	48.81		1343	1382.57	40.02	1127.68	48.01	1340.69	1379.03	39.12
1858	1126.08	48.81		1344.47	1381.11	40.02	1127.68	48.01	1340.69	1379.03	39.12
1859	1127.55	48.81		1345.93	1381.11	40.02	1127.68	48.01	1340.69	1379.03	39.12
1860	1129.01	48.81		1347.4	1381.11	40.02	1127.68	48.01	1340.69	1379.03	39.12
1861	1131.94	48.81		1350.33	1381.11	40.02	1131.05	48.32	1344.27	1379.64	38.76
1862	1133.41	48.81		1353.26	1381.11	40.02	1137.17	48.66	1349.98	1379.51	39.1
1863	1134.88	48.81		1354.73	1381.11	40.02	1137.17	48.66	1349.98	1379.51	39.1
1864	1136.34	48.81		1356.19	1379.64	40.02	1137.17	48.66	1349.98	1379.51	39.1
1865	1139.27	48.81		1359.12	1379.64	40.02	1137.17	48.66	1349.98	1379.51	39.1
1866	1139.27	48.81		1360.59	1379.64	40.02	1137.17	48.66	1349.98	1379.51	39.1
1867	1140.74	48.81		1362.06	1379.64	40.02	1137.17	48.66	1349.98	1379.51	39.1
1868	1142.2	47.35		1363.52	1379.64	40.02	1138.34	48.71	1351.66	1381.58	39.6
1869	1145.14	47.35		1366.45	1378.18	40.02	1168.39	45.42	1379.23	1378.17	40.32
1870	1146.6	47.35		1369.38	1378.18	40.02	1169.75	45.29	1381.21	1377.99	40.2
1871	1148.07	47.35		1370.85	1378.18	40.02	1171.38	43.98	1385.58	1376.06	39.43
1872	1149.53	47.35		1372.32	1378.18	40.02	1171.38	43.98	1385.58	1376.06	39.43
1873	1152.46	47.35		1375.25	1376.71	40.02	1171.38	43.98	1385.58	1376.06	39.43
1874	1153.93	47.35		1376.71	1376.71	40.02	1171.38	43.98	1385.58	1376.06	39.43
1875	1155.4	47.35		1378.18	1376.71	40.02	1172.92	44.15	1386.86	1374.97	39.52
1876	1155.4	47.35		1379.64	1376.71	40.02	1172.92	44.15	1386.86	1374.97	39.52
1877	1158.33	47.35		1382.57	1376.71	40.02	1171.43	45.73	1384.96	1375.66	40.07
1878	1159.79	47.35		1384.04	1375.25	40.02	1175.15	44.53	1389.24	1375.22	39.46
1879	1161.26	47.35		1386.97	1375.25	40.02	1175.15	44.53	1389.24	1375.22	39.46
1880	1162.72	47.35		1388.44	1375.25	40.02	1175.15	44.53	1389.24	1375.22	39.46
1881	1165.66	47.35		1391.37	1375.25	40.02	1174.69	44.66	1389.32	1376.09	39.3
1882	1181.78	47.35		1391.37	1373.78	40.02	1174.69	44.66	1389.32	1376.09	39.3
1883	1183.24	47.35		1392.83	1373.78	40.02	1189.53	45.4	1399.38	1373.69	38.91
1884	1184.71	47.35		1394.3	1373.78	40.02	1193.05	45.26	1403	1371.58	38.89
1885	1187.64	47.35		1398.7	1372.32	40.02	1192.11	45.39	1402.14	1371.15	38.87
1886	1189.11	47.35		1400.16	1372.32	40.02	1201.86	42.67	1414.81	1370.33	38.3
1887	1189.11	47.35		1401.63	1372.32	40.02	1201.86	42.67	1414.81	1370.33	38.3
1888	1190.57	47.35		1403.09	1372.32	40.02	1200.87	42.33	1413.14	1371.44	38.26
1889	1193.5	47.35		1406.03	1372.32	40.02	1204.29	47.27	1419.5	1368.79	39.54
1890	1194.97	47.35		1407.49	1370.85	40.02	1204.29	47.27	1419.5	1368.79	39.54
1891	1196.43	47.35		1408.96	1370.85	40.02	1204.29	47.27	1419.5	1368.79	39.54
1892	1197.9	47.35		1410.42	1370.85	40.02	1209.5	46.59	1424.77	1367.62	38.48
1893	1200.83	47.35		1413.35	1370.85	40.02	1209.37	46.37	1424.74	1367.59	38.59
1894	1202.3	47.35		1414.82	1370.85	40.02	1207.99	44.09	1425.79	1369.21	39.18
1895	1202.3	47.35		1417.75	1369.38	40.02	1209.83	44.34	1427.21	1370.33	38.76
1896	1203.76	47.35		1419.22	1369.38	40.02	1217.38	47.87	1425.9	1367.15	41.27
1897	1206.69	47.35		1422.15	1369.38	40.02	1217.38	47.87	1425.9	1367.15	41.27
1898	1208.16	47.35		1423.61	1369.38	40.02	1217.38	47.87	1425.9	1367.15	41.27
1899	1209.63	47.35		1425.08	1369.38	40.02	1219.16	47.85	1431.1	1366.08	39.84
1900	1211.09	47.35		1426.55	1369.38	40.02	1218.88	48.1	1430.48	1365.63	39.88
1901	1214.02	47.35		1429.48	1367.92	40.02	1226.01	49.44	1436.53	1363.16	40.14
1902	1215.49	47.35		1430.94	1367.92	40.02	1225.79	48.95	1438.19	1365.44	40.24
1903	1215.49	47.35		1432.41	1367.92	40.02	1221.25	42.69	1437.83	1365.06	38.32
1904	1216.95	47.35		1433.87	1367.92	40.02	1221.25	42.69	1437.83	1365.06	38.32
1905	1219.89	47.35		1438.27	1366.45	40.02	1221.25	42.69	1437.83	1365.06	38.32
1906	1221.35	47.35		1439.74	1366.45	40.02	1221.25	42.69	1437.83	1365.06	38.32
1907	1222.82	47.35		1441.2	1366.45	40.02	1222.8	43.48	1438.78	1363.68	38.94
1908	1224.28	47.35		1442.67	1366.45	40.02	1223.48	43.32	1439.37	1363.51	38.81
1909	1227.21	47.35		1445.6	1366.45	40.02	1243.61	47.25	1459.51	1361.64	40.64
1910	1228.68	47.35		1447.06	1364.99	40.02	1243.61	47.25	1459.51	1361.64	40.64
1911	1228.68	47.35		1448.53	1364.99	40.02	1243.61	47.25	1459.51	1361.64	40.64
1912	1230.14	47.35		1450	1364.99	40.02	1243.61	47.25	1459.51	1361.64	40.64
1913	1233.08	47.35		1452.93	1364.99	40.02	1243.61	47.25	1459.51	1361.64	40.64
1914	1234.54	47.35		1454.39	1364.99	40.02	1242.5	45.16	1458.56	1362.25	39.38
1915	1236.01	47.35		1455.86	1364.99	40.02	1238.78	44.38	1455.67	1362.82	38.63
1916	1237.47	47.35		1458.79	1363.52	40.02	1244.69	44.88	1461.09	1362.04	38.1
1917	1240.4	47.35		1461.72	1363.52	40.02	1248.44	43.46	1466.36	1357.21	40.01
1918	1241.87	47.35		1463.19	1363.52	40.02	1248.44	43.46	1466.36	1357.21	40.01
1919	1241.87	47.35		1464.65	1363.52	40.02	1248.44	43.46	1466.36	1357.21	40.01
1920	1243.34	47.35		1466.12	1363.52	40.02	1248.44	43.46	1466.36	1357.21	40.01
1921	1.91	1.91		20.1	1.91	20.1	50.42	45.92	38.71	66.66	25.79
1922	3.43	4.94		20.1	4.94	20.1	48.06	45.32	39.52	64.28	27.58
1923	6.46	6.46		20.1	6.46	20.1	49.2	44.07	37.01	63.31	25.57
1924	7.98	9.49		20.1	7.98	20.1	50.02	45.11	37.86	65.22	26.4
1925	11.01	14.04		20.1	12.52	20.1	50.86	46.53	37.7	66.23	25.96
1926	14.04	15.56		20.1	15.56	20.1	51.01	46.52	37.74	65.8	26.66
1927	15.56	18.59		20.1	17.07	20.1	51.01	46.52	37.74	65.8	26.66
1928	17.07	20.1		20.1	18.59	20.1	55.07	49.98	39.02	70.38	26.53
1929	21.62	24.65		20.1	23.14	20.1	57.97	55.5	39.24	72.67	24.79
1930	23.14	27.68		20.1	24.65	20.1	57.88	55.46	39.36	72.91	24.98
1931	24.65	29.2		20.1	27.68	20.1	58.17	55.65	39.32	73.05	24.77
1932	26.17	32.23		20.1	29.2	20.1	65.7	62.26	40.59	80.86	25.15
1933	30.72	36.78		20.1	33.75	20.1	65.7	62.26	40.59	80.86	25.15
1934	32.23	38.3		20.1	35.26	20.1	65.7	62.26	40.59	80.86	25.15
1935	33.75	41.33		20.1	38.3	20.1	66.01	62.97	40.75	80.82	25.34
1936	36.78	42.84		20.1	39.81	20.1	66.01	62.97	40.75	80.82	25.34
1937	39.81	47.39		20.1	44.36	20.1	75.05	76.46	38.44	91.98	24.71
1938	41.33	50.42		20.1	45.88	20.1	76.42	77.97	38.28	93.28	24.7
1939	44.36	51.94		20.1	48.91	20.1	76.35	77.4	38.06	92.83	24.42
1940	45.88	54.97		20.1	50.42	20.1	76.35	77.4	38.06	92.83	24.42
1941	48.91	59.52		20.1	54.97	20.1	78.45	79.14	38.26	94.59	24.78
1942	50.42	61.04		20.1	56.49	20.1	78.45	79.14	38.26	94.59	24.78
1943	53.46	64.07		20.1	59.52	20.1	85.76	92.07	33.26	100.93	23.57
1944	54.97	65.59		20.1	61.04	20.1	85.27	91.48	32.78	100.41	22.88
1945	58.01	70.13		20.1	65.59	20.1	85.64	91.66	32.96	100.79	22.96
1946	61.04	73.17		20.1	67.1	20.1	88.47	93.88	32.05	101.73	22.34
1947	62.55	74.68		20.1	68.62	20.1	88.47	93.88	32.05	101.73	22.34
1948	64.07	76.2		20.1	71.65	20.1	86.71	92.33	32.46	100.9	23.14
1949	68.62	80.75		20.1	76.2	20.1	99.99	109.56	31.48	114.07	25.02
1950	70.13	83.78		20.1	77.71	20.1	98.17	106.84	32.62	112.51	25.9
1951	71.65	85.29		20.1	79.23	20.1	98.66	107.31	32.53	112.81	25.76
1952	73.17	88.33		20.1	82.26	20.1	98.66	107.31	32.53	112.81	25.76
1953	77.71	92.87		20.1	85.29	20.1	103.67	116.79	28.85	118.07	23.99
1954	79.23	94.39		20.1	88.33	20.1	103.67	116.79	28.85	118.07	23.99
1955	80.75	97.42		20.1	89.84	20.1	103.54	115.18	30.8	118.53	25.13
1956	82.26	98.94		20.1	91.36	20.1	103.54	115.18	30.8	118.53	25.13
1957	86.81	103.49		20.1	95.91	20.1	109.78	124.2	25.86	121.13	21.01
1958	88.33	106.52		20.1	98.94	20.1	109.55	124.09	25.42	120.82	20.84
1959	89.84	108.03		20.1	100.45	20.1	109.74	124.33	25.39	121.02	20.82
1960	92.87	111.07		20.1	101.97	20.1	111.38	125.21	27.89	123.61	21.33
1961	95.91	114.1		20.1	106.52	20.1	111.99	125.59	28.08	124.87	21.59
1962	97.42	117.13		20.1	108.03	20.1	111.99	125.59	28.08	124.87	21.59
1963	98.94	118.65		20.1	111.07	20.1	116.68	135.55	23.99	129.9	22.17
1964	101.97	121.68		20.1	112.58	20.1	116.68	135.55	23.99	129.9	22.17
1965	105	126.23		20.1	117.13	20.1	119.73	139.1	22.64	132.27	22.4
1966	106.52	127.74		20.1	118.65	20.1	119.73	139.1	22.64	132.27	22.4
1967	109.55	130.78		20.1	120.16	20.1	122.68	141.01	26.72	138.67	24
1968	111.07	132.29		20.1	123.2	20.1	126.02	146.83	24.44	141.75	23.15
1969	114.1	136.84		20.1	127.74	20.1	130.14	157.6	20.27	145.91	21.3
1970	115.62	138.36		20.1	129.26	20.1	130.14	157.6	20.27	145.91	21.3
1971	118.65	141.39		20.1	130.78	20.1	130.14	157.6	20.27	145.91	21.3
1972	120.16	142.9		20.1	133.81	20.1	131.4	156.67	21.59	146.75	21.19
1973	123.2	147.45		20.1	136.84	20.1	132.37	158.42	20.83	147.33	20.81
1974	124.71	150.48		20.1	139.87	20.1	135.51	165.52	18.85	151.63	20.25
1975	127.74	152		20.1	141.39	20.1	137.25	167.78	17.89	152.52	19.22
1976	129.26	155.03		20.1	142.9	20.1	140.37	163.89	27.06	162.69	25.36
1977	132.29	158.06		20.1	147.45	20.1	140.37	163.89	27.06	162.69	25.36
1978	135.32	161.1		20.1	148.97	20.1	140.37	163.89	27.06	162.69	25.36
1979	136.84	162.61		20.1	152	20.1	143.11	169.08	23.73	164.61	23.85
1980	138.36	165.64		20.1	153.52	20.1	142.07	167.21	25.22	163.94	24.42
1981	141.39	170.19		20.1	158.06	20.1	144.43	171.4	23.61	165.67	23.48
1982	144.42	171.71		20.1	159.58	20.1	146.26	173.5	23.06	167.4	23.24
1983	145.94	174.74		20.1	161.1	20.1	170.5	200.94	18.37	188.37	17.46
1984	147.45	176.26		20.1	164.13	20.1	170.5	200.94	18.37	188.37	17.46
1985	150.48	180.81		20.1	167.16	20.1	170.5	200.94	18.37	188.37	17.46
1986	153.52	182.32		20.1	170.19	20.1	170.83	202.48	17.17	188.73	17.28
1987	155.03	185.35		20.1	171.71	20.1	170.83	202.48	17.17	188.73	17.28
1988	156.55	186.87		20.1	173.23	20.1	170.83	202.48	17.17	188.73	17.28
1989	159.58	191.42		20.1	177.77	20.1	181.08	213.95	21.51	206.35	20.77
1990	162.61	192.93		20.1	179.29	20.1	181.08	213.95	21.51	206.35	20.77
1991	164.13	195.97		20.1	182.32	20.1	181.08	213.95	21.51	206.35	20.77
1992	165.64	197.48		20.1	183.84	20.1	183.33	216.83	20.59	208.38	20.56
1993	168.68	202.03		20.1	188.39	20.1	183.33	216.83	20.59	208.38	20.56
1994	170.19	205.06		20.1	189.9	20.1	182.09	215.11	21.16	206.94	20.57
[truncated: 1,607 more rows]

## Sheet: Table S5
		Table S5 Actual and predicted concentration data
								System II: 5-dimensional amino acid samples (bulk solution: water)
Entry	Configuration concentration(mg/L)
	Actual values					Predicted values
	[Gly]	[Thr]	[Pro]	[L-Phe]	[His]	[Gly]	[Thr]	[Pro]	[L-phe]	[His]
	Training set
1	19.95	2.29	2.12	19.95	1.91	27.09	28.57	12.28	31.53	22.64
2	19.95	4.57	4.24	19.95	3.82	25.61	30.05	13.76	31.53	22.64
3	19.94	6.85	6.36	19.94	5.73	25.61	25.61	13.76	28.57	19.68
4	19.93	9.14	8.48	19.93	7.64	25.61	33.01	15.24	33.01	24.12
5	19.92	13.7	12.71	19.92	11.45	25.61	31.53	13.76	33.01	24.12
6	19.92	15.97	14.82	19.92	13.35	27.09	37.45	18.2	34.49	27.09
7	19.91	18.25	16.93	19.91	15.25	27.09	38.93	18.2	35.97	28.57
8	19.9	20.53	19.04	19.9	17.16	27.09	40.42	18.2	35.97	28.57
9	19.89	25.07	23.26	19.89	20.95	28.57	49.3	25.61	37.45	35.97
10	19.88	27.34	25.37	19.88	22.85	27.09	49.3	27.09	34.49	37.45
11	19.88	29.61	27.47	19.88	24.75	27.09	49.3	27.09	34.49	37.45
12	19.87	31.88	29.58	19.87	26.64	27.09	49.3	27.09	34.49	37.45
13	19.86	36.41	33.78	19.86	30.43	25.61	52.26	28.57	37.45	40.42
14	19.85	38.67	35.88	19.85	32.32	25.61	53.74	28.57	37.45	40.42
15	19.85	40.93	37.98	19.85	34.21	25.61	53.74	28.57	37.45	40.42
16	19.84	43.19	40.08	19.84	36.1	27.09	58.19	33.01	37.45	43.38
17	19.83	47.71	44.27	19.83	39.88	24.12	67.07	40.42	37.45	55.22
18	19.82	49.97	46.36	19.82	41.77	24.12	67.07	40.42	37.45	55.22
19	19.82	52.22	48.45	19.82	43.65	24.12	67.07	40.42	37.45	55.22
20	19.81	54.48	50.54	19.81	45.53	24.12	67.07	40.42	37.45	55.22
21	19.8	58.98	54.72	19.8	49.3	24.12	67.07	40.42	38.93	55.22
22	19.79	61.23	56.81	19.79	51.18	24.12	75.96	47.82	38.93	62.63
23	19.79	63.48	58.89	19.79	53.06	22.64	84.84	61.15	35.97	71.51
24	19.78	65.72	60.98	19.78	54.93	22.64	84.84	61.15	35.97	71.51
25	19.77	70.21	65.14	19.77	58.68	22.64	84.84	61.15	35.97	71.51
26	19.76	72.45	67.22	19.76	60.56	22.64	84.84	61.15	35.97	71.51
27	19.75	74.69	69.3	19.75	62.43	24.12	89.29	65.59	37.45	74.48
28	19.75	76.93	71.38	19.75	64.3	24.12	89.29	65.59	35.97	74.48
29	19.74	81.41	75.53	19.74	68.04	19.68	104.09	81.88	34.49	89.29
30	19.73	83.64	77.6	19.73	69.91	19.68	104.09	81.88	34.49	89.29
31	19.72	85.88	79.67	19.72	71.78	19.68	104.09	81.88	34.49	89.29
32	19.72	88.11	81.75	19.72	73.65	19.68	104.09	81.88	34.49	89.29
33	19.7	92.57	85.88	19.7	77.37	19.68	104.09	81.88	34.49	89.29
34	19.7	94.8	87.95	19.7	79.24	19.68	108.54	84.84	34.49	92.25
35	19.69	97.03	90.02	19.69	81.1	19.68	105.58	80.4	35.97	90.77
36	19.69	99.25	92.08	19.69	82.96	19.68	108.54	87.8	33.01	95.21
37	19.67	103.7	96.21	19.67	86.67	19.68	112.98	93.73	33.01	96.69
38	19.67	105.92	98.27	19.67	88.53	19.68	112.98	93.73	33.01	96.69
39	19.66	108.14	100.33	19.66	90.39	19.68	112.98	93.73	33.01	96.69
40	19.66	110.36	102.39	19.66	92.24	19.68	112.98	93.73	33.01	96.69
41	19.64	114.79	106.5	19.64	95.95	19.68	115.94	96.69	31.53	101.13
42	19.64	117	108.55	19.64	97.8	19.68	120.38	99.65	34.49	105.58
43	19.63	119.22	110.61	19.63	99.65	16.72	130.75	114.46	28.57	117.42
44	19.63	121.43	112.66	19.63	101.49	16.72	130.75	114.46	28.57	117.42
45	19.61	125.85	116.76	19.61	105.19	16.72	130.75	114.46	28.57	117.42
46	19.61	128.06	118.81	19.61	107.03	16.72	130.75	114.46	28.57	117.42
47	19.6	130.26	120.85	19.6	108.88	16.72	130.75	114.46	28.57	117.42
48	19.59	132.47	122.9	19.59	110.72	16.72	130.75	115.94	27.09	118.9
49	19.58	136.87	126.99	19.58	114.4	15.24	130.75	114.46	27.09	118.9
50	19.58	139.07	129.03	19.58	116.24	16.72	145.56	130.75	27.09	130.75
51	19.57	141.27	131.07	19.57	118.08	16.72	145.56	130.75	27.09	130.75
52	19.56	143.47	133.11	19.56	119.92	16.72	145.56	130.75	27.09	130.75
53	19.55	147.86	137.18	19.55	123.59	16.72	145.56	130.75	27.09	130.75
54	19.55	150.06	139.22	19.55	125.42	16.72	147.04	132.23	27.09	130.75
55	19.54	152.25	141.25	19.54	127.25	15.24	154.45	139.64	27.09	138.16
56	19.53	154.44	143.29	19.53	129.09	16.72	154.45	141.12	27.09	139.64
57	19.52	158.82	147.35	19.52	132.75	13.76	172.22	157.41	24.12	154.45
58	19.52	161	149.38	19.52	134.57	13.76	172.22	157.41	24.12	154.45
59	19.51	163.19	151.41	19.51	136.4	13.76	172.22	157.41	24.12	154.45
60	19.5	165.37	153.43	19.5	138.23	13.76	172.22	157.41	24.12	154.45
61	19.49	169.74	157.48	19.49	141.87	15.24	173.7	157.41	24.12	154.45
62	19.49	171.92	159.5	19.49	143.7	15.24	173.7	157.41	24.12	154.45
63	19.48	174.1	161.53	19.48	145.52	13.76	172.22	157.41	24.12	154.45
64	19.47	176.28	163.55	19.47	147.34	13.76	172.22	157.41	24.12	154.45
65	19.46	180.63	167.58	19.46	150.98	13.76	172.22	157.41	24.12	154.45
66	19.46	182.8	169.6	19.46	152.79	13.76	172.22	157.41	24.12	154.45
67	19.45	184.97	171.62	19.45	154.61	13.76	172.22	157.41	24.12	154.45
68	19.44	187.14	173.63	19.44	156.42	15.24	173.7	157.41	24.12	154.45
69	19.43	191.48	177.65	19.43	160.05	16.72	187.03	172.22	22.64	164.81
70	19.43	193.65	179.66	19.43	161.86	16.72	188.51	173.7	22.64	166.29
71	19.42	195.82	181.67	19.42	163.67	15.24	192.95	179.62	22.64	170.74
72	19.41	197.98	183.68	19.41	165.48	15.24	192.95	179.62	22.64	170.74
73	19.4	202.3	187.69	19.4	169.09	15.24	192.95	179.62	22.64	170.74
74	19.4	204.46	189.7	19.4	170.9	15.24	192.95	179.62	22.64	170.74
75	19.39	206.62	191.7	19.39	172.7	15.24	195.91	181.1	22.64	172.22
76	19.38	208.78	193.7	19.38	174.51	15.24	212.2	192.95	27.09	182.58
77	19.37	213.09	197.7	19.37	178.11	16.72	212.2	192.95	27.09	182.58
78	19.37	215.25	199.7	19.37	179.91	15.24	212.2	192.95	25.61	182.58
79	19.36	217.4	201.7	19.36	181.71	15.24	212.2	192.95	25.61	182.58
80	19.35	219.55	203.69	19.35	183.51	16.72	216.64	198.87	24.12	187.03
81	19.34	223.85	207.68	19.34	187.1	16.72	218.13	198.87	25.61	188.51
82	19.34	226	209.67	19.34	188.9	16.72	218.13	198.87	25.61	188.51
83	19.33	228.14	211.66	19.33	190.69	18.2	232.94	213.68	25.61	198.87
84	19.32	230.29	213.65	19.32	192.48	18.2	232.94	213.68	25.61	198.87
85	19.31	234.57	217.63	19.31	196.06	19.68	232.94	212.2	27.09	197.39
86	19.31	236.71	219.62	19.31	197.85	19.68	232.94	212.2	27.09	197.39
87	19.3	238.85	221.6	19.3	199.64	18.2	238.86	225.53	19.68	204.8
88	19.3	240.99	223.58	19.3	201.43	18.2	238.86	224.05	19.68	204.8
89	19.28	245.26	227.55	19.28	205	15.24	243.3	225.53	19.68	207.76
90	19.28	247.39	229.53	19.28	206.78	15.24	243.3	225.53	19.68	207.76
91	19.27	249.53	231.51	19.27	208.56	15.24	243.3	227.01	19.68	207.76
92	19.27	251.66	233.48	19.27	210.35	15.24	243.3	227.01	19.68	207.76
93	19.25	255.92	237.44	19.25	213.91	15.24	255.15	238.86	19.68	216.64
94	19.25	258.04	239.41	19.25	215.68	15.24	255.15	238.86	19.68	216.64
95	19.24	260.17	241.38	19.24	217.46	15.24	253.67	237.38	19.68	216.64
96	19.24	262.3	243.35	19.24	219.24	15.24	253.67	237.38	19.68	216.64
97	19.22	266.54	247.29	19.22	222.79	18.2	262.55	244.78	19.68	224.05
98	19.22	268.66	249.26	19.22	224.56	18.2	261.07	244.78	19.68	224.05
99	19.21	270.78	251.23	19.21	226.33	18.2	261.07	246.26	19.68	224.05
100	19.21	272.9	253.19	19.21	228.1	18.2	261.07	246.26	19.68	224.05
101	19.2	277.13	257.12	19.2	231.64	19.68	274.4	258.11	18.2	235.9
102	19.19	279.25	259.08	19.19	233.41	19.68	274.4	258.11	18.2	235.9
103	19.18	281.36	261.04	19.18	235.17	18.2	277.36	262.55	18.2	238.86
104	19.18	283.47	263	19.18	236.94	18.2	277.36	262.55	18.2	238.86
105	19.17	287.69	266.92	19.17	240.47	18.2	277.36	262.55	18.2	238.86
106	19.16	289.8	268.87	19.16	242.23	18.2	284.77	268.48	16.72	244.78
107	19.15	291.91	270.83	19.15	243.99	18.2	284.77	268.48	16.72	244.78
108	19.15	294.02	272.78	19.15	245.75	18.2	284.77	268.48	16.72	244.78
109	19.14	298.22	276.69	19.14	249.27	19.68	295.13	275.88	19.68	252.19
110	19.13	300.32	278.64	19.13	251.02	22.64	302.54	284.77	15.24	256.63
111	19.13	302.42	280.58	19.13	252.78	22.64	302.54	284.77	15.24	256.63
112	19.12	304.52	282.53	19.12	254.53	22.64	302.54	284.77	15.24	256.63
113	19.11	308.72	286.42	19.11	258.04	24.12	305.5	289.21	15.24	259.59
114	19.1	310.81	288.37	19.1	259.79	24.12	305.5	289.21	15.24	259.59
115	19.1	312.91	290.31	19.1	261.54	22.64	308.46	289.21	16.72	259.59
116	19.09	315	292.25	19.09	263.29	25.61	315.87	296.61	16.72	267
117	19.08	319.18	296.13	19.08	266.79	24.12	309.94	295.13	15.24	268.48
118	19.07	321.27	298.07	19.07	268.53	24.12	309.94	295.13	15.24	268.48
119	19.07	323.36	300.01	19.07	270.28	24.12	309.94	295.13	15.24	268.48
120	19.06	325.45	301.94	19.06	272.02	24.12	309.94	295.13	15.24	268.48
121	19.05	329.62	305.81	19.05	275.51	24.12	312.91	298.1	15.24	271.44
122	38.05	331.38	307.45	19.03	276.98	27.09	321.79	304.02	15.24	274.4
123	38.04	333.46	309.38	19.02	278.72	31.53	332.16	314.39	16.72	283.29
124	38.03	335.54	311.31	19.02	280.46	31.53	332.16	314.39	16.72	283.29
125	38.01	339.7	315.16	19	283.93	31.53	332.16	314.39	16.72	283.29
126	38	341.77	317.09	19	285.66	31.53	332.16	314.39	16.72	283.29
127	37.99	343.84	319.01	18.99	287.4	31.53	332.16	314.39	16.72	283.29
128	37.97	345.92	320.93	18.99	289.13	31.53	339.56	321.79	19.68	289.21
129	37.95	350.06	324.78	18.98	292.59	31.53	341.04	323.27	19.68	290.69
130	37.94	352.12	326.69	18.97	294.32	34.49	346.97	330.68	19.68	296.61
131	37.93	354.19	328.61	18.96	296.05	34.49	346.97	330.68	19.68	296.61
132	37.92	356.26	330.53	18.96	297.77	34.49	346.97	330.68	19.68	296.61
133	37.89	360.39	334.36	18.95	301.22	34.49	346.97	330.68	19.68	296.61
134	37.88	362.45	336.27	18.94	302.95	35.97	352.89	336.6	19.68	302.54
135	37.87	364.51	338.18	18.94	304.67	35.97	357.33	344	18.2	304.02
136	37.86	366.57	340.1	18.93	306.39	35.97	355.85	339.56	18.2	302.54
137	37.84	370.69	343.91	18.92	309.83	35.97	366.22	345.49	18.2	314.39
138	37.83	372.74	345.82	18.91	311.55	35.97	366.22	345.49	18.2	314.39
139	37.81	374.8	347.73	18.91	313.27	35.97	366.22	345.49	18.2	314.39
140	37.8	376.85	349.63	18.9	314.99	35.97	366.22	345.49	18.2	314.39
141	37.78	380.95	353.44	18.89	318.42	37.45	375.1	354.37	18.2	320.31
142	37.77	383	355.34	18.88	320.13	35.97	370.66	351.41	15.24	315.87
143	37.76	385.05	357.24	18.88	321.84	38.93	383.99	361.78	16.72	326.23
144	37.75	387.1	359.14	18.87	323.55	38.93	383.99	361.78	16.72	326.23
145	37.72	391.19	362.94	18.86	326.97	38.93	383.99	361.78	16.72	326.23
146	37.71	393.23	364.84	18.86	328.68	38.93	383.99	361.78	16.72	326.23
147	37.7	395.28	366.73	18.85	330.39	38.93	383.99	361.78	16.72	326.23
148	37.69	397.32	368.62	18.85	332.09	38.93	398.8	375.1	18.2	336.6
149	37.67	401.4	372.41	18.83	335.5	38.93	398.8	375.1	18.2	336.6
150	37.66	403.44	374.3	18.83	337.21	38.93	398.8	375.1	18.2	336.6
151	37.65	405.47	376.19	18.82	338.91	38.93	398.8	375.1	18.2	336.6
152	37.63	407.51	378.08	18.82	340.61	38.93	398.8	375.1	18.2	336.6
153	37.61	411.57	381.85	18.81	344.01	38.93	398.8	375.1	18.2	336.6
154	37.6	413.61	383.74	18.8	345.71	38.93	398.8	375.1	18.2	336.6
155	37.59	415.64	385.62	18.79	347.4	40.42	400.28	378.07	16.72	338.08
156	37.58	417.67	387.5	18.79	349.1	37.45	409.17	385.47	16.72	344
157	37.56	421.72	391.26	18.78	352.49	38.93	412.13	383.99	18.2	345.49
158	37.55	423.75	393.14	18.77	354.18	38.93	412.13	383.99	18.2	345.49
159	37.53	425.77	395.02	18.77	355.88	38.93	412.13	383.99	18.2	345.49
160	37.52	427.79	396.9	18.76	357.57	38.93	412.13	383.99	18.2	345.49
161	37.5	431.88	400.69	18.75	359.18	40.42	426.94	401.76	16.72	352.89
162	37.5	433.93	402.6	18.75	359.11	40.42	429.9	403.24	16.72	355.85
163	37.49	435.99	404.51	18.74	359.03	40.42	429.9	401.76	16.72	355.85
164	37.48	438.05	406.41	18.74	358.96	40.42	437.3	412.13	15.24	357.33
165	37.47	442.16	410.23	18.73	358.81	40.42	437.3	412.13	15.24	357.33
166	37.46	444.22	412.13	18.73	358.74	40.42	437.3	412.13	15.24	357.33
167	37.45	446.27	414.04	18.72	358.66	40.42	437.3	412.13	15.24	357.33
168	37.44	448.32	415.94	18.72	358.59	40.42	440.26	413.61	15.24	360.29
169	37.43	452.43	419.75	18.71	358.44	40.42	443.23	419.53	15.24	354.37
170	37.42	454.48	421.65	18.71	358.37	40.42	446.19	421.01	15.24	355.85
171	37.41	456.52	423.55	18.71	358.29	40.42	443.23	421.01	15.24	351.41
172	37.4	458.57	425.46	18.7	358.22	40.42	443.23	421.01	15.24	351.41
173	37.39	462.67	429.25	18.69	358.07	40.42	443.23	421.01	15.24	351.41
174	37.38	464.71	431.15	18.69	358	40.42	443.23	421.01	15.24	351.41
175	37.37	466.76	433.05	18.69	357.92	40.42	463.96	437.3	12.28	358.81
176	37.36	468.8	434.95	18.68	357.85	40.42	468.4	441.75	13.76	358.81
177	37.35	472.89	438.74	18.67	357.7	40.42	474.33	447.67	15.24	354.37
178	37.34	474.93	440.63	18.67	357.63	40.42	474.33	447.67	15.24	354.37
179	37.33	476.97	442.53	18.67	357.55	40.42	474.33	447.67	15.24	354.37
180	37.33	479.01	444.42	18.66	357.48	40.42	474.33	447.67	15.24	354.37
181	37.31	483.09	448.2	18.66	357.33	38.93	480.25	453.59	15.24	355.85
182	37.3	485.13	450.09	18.65	357.26	38.93	480.25	453.59	15.24	355.85
183	37.3	487.16	451.98	18.65	357.18	40.42	474.33	447.67	15.24	354.37
184	37.29	489.2	453.87	18.64	357.11	40.42	474.33	447.67	15.24	354.37
185	37.27	493.27	457.65	18.64	356.96	40.42	474.33	447.67	15.24	354.37
186	37.26	495.3	459.53	18.63	356.89	40.42	474.33	447.67	15.24	354.37
187	37.26	497.34	461.42	18.63	356.82	40.42	474.33	447.67	15.24	354.37
188	37.25	499.37	463.3	18.62	356.74	38.93	480.25	453.59	15.24	355.85
189	37.23	503.43	467.07	18.62	356.6	38.93	500.98	471.36	16.72	351.41
190	37.23	505.46	468.95	18.61	356.52	38.93	506.91	475.81	16.72	351.41
191	37.22	507.49	470.84	18.61	356.45	38.93	506.91	475.81	16.72	351.41
192	37.21	509.51	472.72	18.61	356.38	38.93	511.35	478.77	18.2	352.89
193	37.2	513.57	476.48	18.6	356.23	38.93	511.35	478.77	18.2	352.89
194	37.19	515.59	478.36	18.59	356.16	38.93	511.35	478.77	18.2	352.89
195	37.18	517.62	480.23	18.59	356.08	38.93	515.79	483.21	18.2	354.37
196	37.17	519.64	482.11	18.59	356.01	38.93	515.79	483.21	18.2	354.37
197	37.16	523.68	485.86	18.58	355.87	38.93	518.75	486.17	18.2	354.37
198	37.15	525.7	487.74	18.58	355.79	38.93	518.75	486.17	16.72	355.85
199	37.14	527.72	489.61	18.57	355.72	38.93	518.75	487.65	15.24	351.41
200	37.13	529.74	491.49	18.57	355.65	38.93	518.75	487.65	15.24	351.41
201	37.12	533.78	495.23	18.56	355.5	38.93	526.16	493.58	15.24	352.89
202	37.11	535.8	497.1	18.56	355.43	37.45	532.08	502.46	16.72	351.41
203	37.1	537.81	498.97	18.55	355.36	37.45	538.01	506.91	18.2	352.89
204	37.1	539.83	500.84	18.55	355.28	37.45	536.52	505.43	18.2	352.89
205	37.08	543.86	504.58	18.54	355.14	37.45	539.49	506.91	16.72	352.89
206	37.07	545.87	506.45	18.54	355.06	37.45	539.49	506.91	16.72	352.89
207	37.07	547.88	508.31	18.53	354.99	37.45	539.49	506.91	16.72	352.89
208	37.06	549.89	510.18	18.53	354.92	37.45	542.45	509.87	16.72	352.89
209	37.04	553.91	513.91	18.52	354.77	38.93	551.33	514.31	19.68	352.89
210	37.04	555.92	515.77	18.52	354.7	38.93	555.78	518.75	18.2	352.89
211	37.03	557.93	517.63	18.51	354.63	38.93	555.78	517.27	18.2	352.89
212	37.02	559.93	519.5	18.51	354.56	38.93	555.78	517.27	18.2	352.89
213	37.01	563.95	523.22	18.5	354.41	37.45	564.66	527.64	18.2	351.41
214	37	565.95	525.08	18.5	354.34	37.45	564.66	527.64	18.2	351.41
215	36.99	567.95	526.94	18.5	354.27	38.93	566.14	530.6	18.2	349.93
216	36.98	569.96	528.79	18.49	354.19	37.45	573.55	536.52	18.2	349.93
217	36.97	573.96	532.51	18.48	354.05	37.45	572.07	536.52	16.72	351.41
218	36.96	575.96	534.36	18.48	353.98	37.45	572.07	536.52	16.72	351.41
219	36.95	577.96	536.22	18.48	353.9	37.45	573.55	538.01	18.2	351.41
220	36.95	579.96	538.07	18.47	353.83	37.45	573.55	538.01	18.2	351.41
221	36.93	583.95	541.78	18.47	353.69	37.45	575.03	539.49	18.2	349.93
222	36.92	585.95	543.63	18.46	353.62	37.45	580.95	540.97	21.16	349.93
223	36.92	587.94	545.48	18.46	353.54	37.45	580.95	540.97	21.16	349.93
224	36.91	589.94	547.33	18.45	353.47	37.45	582.43	540.97	19.68	351.41
225	36.89	593.93	551.03	18.45	353.33	37.45	582.43	540.97	19.68	351.41
226	36.89	595.92	552.88	18.44	353.26	38.93	588.36	546.89	18.2	349.93
227	36.88	597.91	554.73	18.44	353.18	38.93	588.36	546.89	18.2	349.93
228	36.87	599.9	556.58	18.44	353.11	38.93	586.88	546.89	18.2	348.45
229	36.86	603.88	560.27	18.43	352.97	37.45	603.17	563.18	16.72	349.93
230	36.85	605.87	562.11	18.42	352.9	37.45	603.17	563.18	16.72	349.93
231	36.84	607.85	563.96	18.42	352.82	37.45	603.17	566.14	18.2	348.45
232	36.83	609.84	565.8	18.42	352.75	37.45	604.65	566.14	16.72	348.45
233	36.82	613.81	569.48	18.41	352.61	37.45	610.57	570.59	19.68	351.41
234	36.81	615.8	571.32	18.41	352.54	37.45	610.57	570.59	19.68	351.41
235	36.8	617.78	573.16	18.4	352.47	37.45	616.49	576.51	19.68	351.41
236	36.8	619.76	575	18.4	352.39	37.45	616.49	576.51	19.68	351.41
237	36.78	623.72	578.68	18.39	352.25	35.97	612.05	570.59	19.68	346.97
238	36.77	625.7	580.52	18.39	352.18	35.97	612.05	570.59	19.68	346.97
239	36.77	627.68	582.35	18.38	352.11	35.97	612.05	570.59	19.68	346.97
240	36.76	629.66	584.19	18.38	352.04	37.45	619.46	576.51	21.16	348.45
241	36.74	633.62	587.86	18.37	351.89	37.45	620.94	579.47	21.16	346.97
242	36.7	635.01	589.15	36.7	351.5	38.93	643.15	594.28	33.01	346.97
243	36.69	636.98	590.98	36.69	351.43	38.93	643.15	594.28	33.01	346.97
244	36.69	638.96	592.81	36.69	351.36	38.93	643.15	594.28	33.01	346.97
245	36.67	642.9	596.47	36.67	351.22	38.93	643.15	594.28	33.01	346.97
246	36.66	644.87	598.3	36.66	351.14	38.93	644.63	598.72	30.05	346.97
247	36.66	646.84	600.12	36.66	351.07	37.45	644.63	597.24	30.05	346.97
248	36.65	648.81	601.95	36.65	351	37.45	644.63	597.24	30.05	346.97
249	36.64	652.74	605.6	36.64	350.86	40.42	655	612.05	35.97	344
250	36.63	654.71	607.43	36.63	350.79	40.42	655	612.05	35.97	344
251	36.62	656.68	609.25	36.62	350.72	40.42	655	612.05	35.97	344
252	36.61	658.64	611.07	36.61	350.65	40.42	657.96	615.01	37.45	344
253	36.6	662.57	614.72	36.6	350.51	40.42	657.96	615.01	37.45	344
254	36.59	664.53	616.54	36.59	350.43	40.42	663.88	619.46	37.45	341.04
255	36.58	666.49	618.36	36.58	350.36	40.42	665.36	620.94	35.97	341.04
256	36.58	668.45	620.18	36.58	350.29	40.42	665.36	620.94	35.97	341.04
257	36.56	672.37	623.81	36.56	350.15	38.93	680.17	628.34	38.93	348.45
258	36.55	674.33	625.63	36.55	350.08	38.93	680.17	628.34	38.93	348.45
259	36.55	676.29	627.45	36.55	350.01	38.93	680.17	628.34	38.93	348.45
260	36.54	678.24	629.26	36.54	349.94	38.93	680.17	628.34	38.93	348.45
261	36.52	682.16	632.89	36.52	349.8	38.93	687.58	637.23	40.42	346.97
262	36.52	684.11	634.7	36.52	349.73	38.93	692.02	640.19	40.42	349.93
263	36.51	686.06	636.52	36.51	349.66	38.93	687.58	637.23	40.42	346.97
264	36.5	688.02	638.33	36.5	349.59	38.93	687.58	637.23	40.42	346.97
265	36.49	691.92	641.95	36.49	349.45	38.93	687.58	637.23	40.42	346.97
266	36.48	693.87	643.76	36.48	349.38	38.93	687.58	637.23	40.42	346.97
267	36.47	695.82	645.57	36.47	349.31	38.93	687.58	637.23	40.42	346.97
268	36.47	697.77	647.38	36.47	349.23	38.93	692.02	640.19	40.42	349.93
269	36.45	701.67	650.99	36.45	349.09	37.45	699.43	653.52	37.45	341.04
270	36.44	703.61	652.8	36.44	349.02	37.45	699.43	653.52	40.42	341.04
271	36.44	705.56	654.6	36.44	348.95	37.45	702.39	655	37.45	342.52
272	36.43	707.5	656.41	36.43	348.88	37.45	702.39	655	37.45	342.52
273	36.41	711.39	660.02	36.41	348.74	37.45	702.39	655	37.45	342.52
274	36.41	713.33	661.82	36.41	348.67	37.45	702.39	655	37.45	342.52
275	36.4	715.28	663.62	36.4	348.6	37.45	703.87	656.48	37.45	344
276	36.39	717.22	665.42	36.39	348.53	37.45	721.64	671.29	38.93	345.49
277	36.38	721.1	669.02	36.38	348.39	35.97	729.04	677.21	38.93	346.97
278	36.37	723.04	670.82	36.37	348.32	35.97	729.04	677.21	38.93	345.49
279	36.36	724.97	672.62	36.36	348.25	35.97	729.04	677.21	38.93	345.49
280	36.36	726.91	674.41	36.36	348.18	35.97	729.04	677.21	38.93	345.49
281	36.34	730.78	678.01	36.34	348.04	35.97	730.53	677.21	38.93	346.97
282	36.33	732.72	679.8	36.33	347.97	35.97	730.53	677.21	38.93	346.97
283	36.33	734.65	681.6	36.33	347.9	38.93	726.08	677.21	37.45	342.52
284	36.32	736.59	683.39	36.32	347.83	37.45	724.6	674.25	35.97	339.56
285	36.3	740.45	686.98	36.3	347.69	37.45	724.6	674.25	35.97	339.56
286	36.3	742.38	688.77	36.3	347.62	35.97	729.04	678.69	37.45	344
287	36.29	744.31	690.56	36.29	347.56	35.97	729.04	678.69	37.45	344
288	36.28	746.24	692.35	36.28	347.49	37.45	729.04	678.69	37.45	344
289	36.27	750.1	695.93	36.27	347.35	33.01	746.82	700.91	41.9	342.52
290	36.26	752.03	697.71	36.26	347.28	33.01	746.82	700.91	41.9	342.52
291	36.25	753.95	699.5	36.25	347.21	34.49	748.3	700.91	43.38	344
292	36.25	755.88	701.29	36.25	347.14	33.01	748.3	700.91	43.38	344
293	36.23	759.73	704.86	36.23	347	33.01	757.18	708.31	43.38	346.97
294	36.22	761.65	706.64	36.22	346.93	33.01	757.18	708.31	43.38	346.97
295	36.22	763.57	708.43	36.22	346.86	33.01	755.7	708.31	43.38	346.97
296	36.21	765.49	710.21	36.21	346.79	33.01	755.7	708.31	43.38	346.97
297	36.2	769.34	713.77	36.2	346.65	31.53	776.43	720.16	38.93	351.41
298	36.19	771.26	715.56	36.19	346.58	31.53	776.43	720.16	38.93	351.41
299	36.18	773.17	717.34	36.18	346.51	30.05	774.95	718.68	38.93	351.41
300	36.17	775.09	719.12	36.17	346.44	31.53	773.47	718.68	38.93	349.93
301	36.16	778.93	722.67	36.16	346.31	33.01	788.28	729.04	37.45	349.93
302	36.15	780.84	724.45	36.15	346.24	34.49	782.36	726.08	38.93	346.97
303	36.15	782.76	726.23	36.15	346.17	34.49	786.8	730.53	41.9	348.45
304	36.14	784.67	728	36.14	346.1	34.49	786.8	730.53	41.9	348.45
305	36.12	788.5	731.55	36.12	345.96	34.49	786.8	730.53	41.9	348.45
306	36.12	790.41	733.33	36.12	345.89	35.97	791.24	733.49	43.38	346.97
307	36.11	792.32	735.1	36.11	345.82	34.49	789.76	733.49	43.38	346.97
308	36.1	794.23	736.87	36.1	345.75	34.49	789.76	733.49	43.38	346.97
309	36.09	798.05	740.41	36.09	345.62	34.49	804.57	748.3	38.93	346.97
310	36.08	799.96	742.18	36.08	345.55	34.49	804.57	748.3	38.93	346.97
311	36.07	801.86	743.95	36.07	345.48	34.49	804.57	748.3	38.93	346.97
312	36.07	803.77	745.72	36.07	345.41	34.49	804.57	748.3	38.93	346.97
313	36.05	807.58	749.26	36.05	345.27	34.49	807.53	746.82	38.93	348.45
314	36.04	809.49	751.02	36.04	345.2	34.49	807.53	746.82	38.93	348.45
315	36.04	811.39	752.79	36.04	345.13	34.49	807.53	746.82	38.93	348.45
316	36.03	813.29	754.56	36.03	345.07	34.49	809.01	745.33	40.42	348.45
317	36.02	817.09	758.08	36.02	344.93	34.49	811.98	755.7	37.45	345.49
318	36.01	819	759.85	36.01	344.86	34.49	811.98	755.7	37.45	345.49
319	36	820.89	761.61	36	344.79	34.49	811.98	755.7	37.45	345.49
320	35.99	822.79	763.37	35.99	344.72	34.49	810.5	755.7	37.45	346.97
321	35.98	826.6	764.99	35.98	346.31	34.49	810.5	755.7	37.45	346.97
322	35.97	828.5	764.84	35.97	347.97	33.01	816.42	751.26	40.42	351.41
323	35.97	830.41	764.7	35.97	349.63	34.49	838.63	758.66	37.45	363.26
324	35.96	832.31	764.55	35.96	351.28	34.49	838.63	758.66	37.45	363.26
325	35.95	836.11	764.27	35.95	354.59	34.49	838.63	758.66	37.45	363.26
326	35.94	838.01	764.12	35.94	356.25	34.49	838.63	758.66	37.45	363.26
327	35.93	839.91	763.98	35.93	357.9	34.49	838.63	758.66	37.45	363.26
328	35.93	841.81	763.83	35.93	359.55	33.01	840.11	755.7	38.93	369.18
329	35.91	845.61	763.54	35.91	362.85	34.49	838.63	758.66	37.45	363.26
330	35.91	847.51	763.4	35.91	364.51	34.49	838.63	758.66	37.45	363.26
331	35.9	849.4	763.26	35.9	366.16	34.49	838.63	758.66	37.45	363.26
332	35.89	851.3	763.11	35.89	367.81	34.49	838.63	758.66	37.45	363.26
333	35.88	855.09	762.82	35.88	371.1	34.49	838.63	758.66	37.45	363.26
334	35.87	856.98	762.68	35.87	372.75	34.49	838.63	758.66	37.45	363.26
335	35.86	858.88	762.54	35.86	374.4	33.01	840.11	755.7	38.93	369.18
336	35.86	860.77	762.39	35.86	376.04	34.49	862.33	760.14	40.42	383.99
337	35.84	864.55	762.1	35.84	379.34	35.97	868.25	761.63	40.42	388.43
338	35.84	866.44	761.96	35.84	380.98	34.49	874.18	761.63	40.42	391.39
339	35.83	868.33	761.82	35.83	382.62	34.49	874.18	761.63	40.42	391.39
340	35.82	870.22	761.67	35.82	384.27	34.49	874.18	761.63	40.42	391.39
341	35.81	874	761.39	35.81	387.55	35.97	880.1	760.14	38.93	392.87
342	35.8	875.88	761.24	35.8	389.19	35.97	880.1	760.14	38.93	392.87
343	35.8	877.77	761.1	35.8	390.83	33.01	878.62	755.7	37.45	397.32
344	35.79	879.65	760.96	35.79	392.48	33.01	872.69	755.7	37.45	392.87
345	35.78	883.42	760.67	35.78	395.75	33.01	881.58	757.18	37.45	397.32
346	35.77	885.31	760.53	35.77	397.39	33.01	881.58	757.18	37.45	397.32
347	35.76	887.19	760.38	35.76	399.03	33.01	881.58	757.18	37.45	397.32
348	35.76	889.07	760.24	35.76	400.67	33.01	883.06	758.66	38.93	400.28
349	35.74	892.83	759.96	35.74	403.94	34.49	900.83	757.18	37.45	415.09
350	35.74	894.71	759.81	35.74	405.58	34.49	900.83	757.18	37.45	415.09
351	35.73	896.59	759.67	35.73	407.21	34.49	908.24	757.18	35.97	418.05
352	35.72	898.47	759.53	35.72	408.84	34.49	908.24	757.18	35.97	418.05
353	35.71	902.22	759.24	35.71	412.11	34.49	908.24	757.18	35.97	418.05
354	35.7	904.1	759.1	35.7	413.74	34.49	908.24	757.18	35.97	418.05
355	35.7	905.97	758.96	35.7	415.37	34.49	912.68	758.66	37.45	421.01
356	35.69	907.85	758.81	35.69	417.01	34.49	912.68	758.66	37.45	421.01
357	35.68	911.6	758.53	35.68	420.27	33.01	920.08	758.66	38.93	422.49
358	35.67	913.47	758.39	35.67	421.9	33.01	920.08	757.18	40.42	422.49
359	35.66	915.34	758.25	35.66	423.52	34.49	928.97	755.7	38.93	426.94
360	35.66	917.21	758.1	35.66	425.15	34.49	928.97	755.7	38.93	426.94
361	35.64	920.95	757.82	35.64	428.41	33.01	949.7	755.7	38.93	440.26
362	35.6	939.8	757	35.6	429.65	33.01	951.18	755.7	40.42	441.75
363	35.6	941.67	756.86	35.6	431.27	33.01	952.66	755.7	40.42	441.75
364	35.59	943.53	756.72	35.59	432.9	34.49	942.3	752.74	38.93	432.86
365	35.58	947.25	756.44	35.58	436.14	34.49	943.78	751.26	38.93	434.34
366	35.57	949.11	756.29	35.57	437.76	34.49	958.59	751.26	38.93	444.71
367	35.56	950.97	756.15	35.56	439.39	34.49	958.59	751.26	38.93	444.71
368	35.56	952.83	756.01	35.56	441.01	34.49	952.66	752.74	38.93	440.26
369	35.54	956.55	755.73	35.54	444.25	34.49	967.47	754.22	40.42	453.59
370	35.54	958.41	755.59	35.54	445.86	34.49	967.47	754.22	40.42	453.59
371	35.53	960.26	755.45	35.53	447.48	34.49	967.47	754.22	40.42	453.59
372	35.52	962.12	755.31	35.52	449.1	34.49	977.84	752.74	40.42	461
373	35.51	965.83	755.02	35.51	452.33	34.49	979.32	751.26	40.42	461
374	35.5	967.68	754.88	35.5	453.95	33.01	976.36	752.74	40.42	462.48
375	35.5	969.53	754.74	35.5	455.56	33.01	977.84	749.78	40.42	463.96
376	35.49	971.39	754.6	35.49	457.18	33.01	977.84	749.78	40.42	463.96
377	35.48	975.09	754.32	35.48	460.41	33.01	967.47	751.26	38.93	461
378	35.47	976.94	754.18	35.47	462.02	34.49	982.28	751.26	37.45	469.88
379	35.47	978.79	754.04	35.47	463.63	34.49	982.28	749.78	38.93	469.88
380	35.46	980.64	753.9	35.46	465.24	34.49	982.28	749.78	38.93	469.88
381	35.45	984.33	753.62	35.45	468.46	37.45	992.65	748.3	38.93	475.81
382	35.44	986.18	753.48	35.44	470.07	35.97	992.65	748.3	38.93	475.81
383	35.43	988.03	753.34	35.43	471.68	35.97	1005.98	746.82	38.93	483.21
384	35.43	989.87	753.2	35.43	473.29	35.97	1005.98	746.82	38.93	483.21
385	35.41	993.56	752.91	35.41	476.51	35.97	1005.98	746.82	38.93	483.21
386	35.41	995.4	752.77	35.41	478.11	35.97	1008.94	748.3	38.93	484.69
387	35.4	997.25	752.63	35.4	479.72	35.97	1010.42	746.82	38.93	486.17
388	35.39	999.09	752.49	35.39	481.32	35.97	1010.42	746.82	38.93	486.17
389	35.38	1002.77	752.21	35.38	484.53	35.97	1019.31	745.33	40.42	490.62
390	35.37	1004.61	752.07	35.37	486.14	34.49	1008.94	745.33	40.42	489.13
391	35.37	1006.45	751.93	35.37	487.74	34.49	1008.94	745.33	40.42	489.13
392	35.36	1008.29	751.79	35.36	489.34	34.49	1008.94	745.33	40.42	489.13
393	35.35	1011.96	751.52	35.35	492.55	34.49	1016.34	743.85	40.42	495.06
394	35.34	1013.8	751.38	35.34	494.15	34.49	1016.34	743.85	40.42	495.06
395	35.33	1015.64	751.24	35.33	495.75	34.49	1016.34	743.85	40.42	495.06
396	35.33	1017.47	751.1	35.33	497.35	35.97	1023.75	742.37	38.93	506.91
397	35.31	1021.14	750.82	35.31	500.54	31.53	1044.48	745.33	38.93	518.75
398	35.31	1022.97	750.68	35.31	502.14	31.53	1044.48	745.33	38.93	518.75
399	35.3	1024.81	750.54	35.3	503.74	31.53	1044.48	745.33	38.93	518.75
400	35.29	1026.64	750.4	35.29	505.34	31.53	1044.48	745.33	38.93	518.75
401	35.28	1030.3	750.12	35.28	508.53	31.53	1056.33	745.33	38.93	529.12
402	35.27	1032.13	749.98	35.27	510.12	31.53	1053.37	746.82	38.93	523.2
403	35.27	1033.96	749.84	35.27	511.72	31.53	1051.89	745.33	37.45	529.12
404	35.26	1035.79	749.7	35.26	513.31	31.53	1051.89	745.33	37.45	529.12
405	35.25	1039.44	749.43	35.25	516.5	31.53	1051.89	745.33	37.45	529.12
406	35.24	1041.27	749.29	35.24	518.09	31.53	1051.89	745.33	37.45	529.12
407	35.24	1043.09	749.15	35.24	519.68	31.53	1051.89	745.33	37.45	529.12
408	35.23	1044.92	749.01	35.23	521.27	31.53	1053.37	743.85	35.97	532.08
409	35.22	1048.57	748.73	35.22	524.45	31.53	1056.33	742.37	35.97	532.08
410	35.21	1050.39	748.59	35.21	526.04	31.53	1056.33	742.37	35.97	532.08
411	35.2	1052.21	748.45	35.2	527.63	31.53	1056.33	742.37	35.97	532.08
412	35.2	1054.03	748.32	35.2	529.21	31.53	1056.33	742.37	35.97	532.08
413	35.18	1057.68	748.04	35.18	532.39	31.53	1056.33	742.37	35.97	532.08
414	35.18	1059.5	747.9	35.18	533.97	31.53	1078.54	740.89	35.97	552.81
415	35.17	1061.31	747.76	35.17	535.56	31.53	1078.54	740.89	34.49	552.81
416	35.16	1063.13	747.62	35.16	537.14	31.53	1078.54	740.89	35.97	552.81
417	35.15	1066.77	747.35	35.15	540.31	31.53	1078.54	740.89	35.97	552.81
418	35.14	1068.58	747.21	35.14	541.89	31.53	1078.54	740.89	35.97	552.81
419	35.14	1070.4	747.07	35.14	543.48	31.53	1078.54	740.89	35.97	552.81
420	35.13	1072.21	746.93	35.13	545.06	31.53	1078.54	740.89	35.97	552.81
421	35.12	1075.84	746.66	35.12	548.22	31.53	1078.54	740.89	34.49	552.81
422	35.11	1077.65	746.52	35.11	549.8	30.05	1085.95	739.41	35.97	563.18
423	35.11	1079.47	746.38	35.11	551.38	30.05	1090.39	739.41	34.49	570.59
424	35.1	1081.28	746.24	35.1	552.96	30.05	1090.39	739.41	34.49	570.59
425	35.09	1084.9	745.97	35.09	556.12	28.57	1094.83	739.41	35.97	569.1
426	35.08	1086.71	745.83	35.08	557.69	28.57	1094.83	739.41	35.97	569.1
427	35.07	1088.52	745.69	35.07	559.27	28.57	1094.83	739.41	35.97	569.1
428	35.07	1090.33	745.56	35.07	560.85	30.05	1091.87	739.41	35.97	570.59
429	35.05	1093.94	745.28	35.05	564	31.53	1109.64	739.41	33.01	585.4
430	35.05	1095.75	745.14	35.05	565.57	31.53	1109.64	739.41	33.01	585.4
431	35.04	1097.55	745.01	35.04	567.14	33.01	1111.12	740.89	34.49	583.91
432	35.03	1099.36	744.87	35.03	568.72	31.53	1109.64	739.41	34.49	582.43
433	35.02	1102.97	744.59	35.02	571.86	30.05	1114.08	740.89	34.49	583.91
434	35.01	1104.77	744.46	35.01	573.43	30.05	1114.08	740.89	34.49	583.91
435	35.01	1106.57	744.32	35.01	575	31.53	1109.64	740.89	34.49	579.47
436	35	1108.37	744.18	35	576.57	31.53	1109.64	740.89	34.49	579.47
437	34.99	1111.97	743.91	34.99	579.71	34.49	1114.08	740.89	33.01	579.47
438	34.98	1113.77	743.77	34.98	581.28	31.53	1121.49	740.89	34.49	589.84
439	34.98	1115.57	743.64	34.98	582.85	31.53	1121.49	740.89	34.49	589.84
440	34.97	1117.37	743.5	34.97	584.42	31.53	1121.49	740.89	34.49	589.84
441	34.96	1120.96	743.23	34.96	587.55	33.01	1128.89	742.37	33.01	595.76
442	34.95	1122.76	743.09	34.95	589.12	30.05	1131.86	737.93	34.49	603.17
443	34.94	1124.56	742.95	34.94	590.68	30.05	1131.86	737.93	34.49	603.17
444	34.94	1126.35	742.82	34.94	592.24	30.05	1131.86	737.93	34.49	603.17
445	34.92	1129.94	742.54	34.92	595.37	28.57	1131.86	737.93	34.49	601.69
446	34.92	1131.73	742.41	34.92	596.93	28.57	1131.86	737.93	35.97	601.69
447	34.91	1133.53	742.27	34.91	598.5	28.57	1131.86	737.93	35.97	601.69
448	34.91	1135.32	742.13	34.91	600.06	28.57	1134.82	737.93	34.49	607.61
449	34.89	1138.9	741.86	34.89	603.18	27.09	1139.26	737.93	34.49	609.09
450	34.89	1140.69	741.73	34.89	604.74	30.05	1146.67	736.45	35.97	612.05
451	34.88	1142.48	741.59	34.88	606.3	30.05	1146.67	736.45	35.97	612.05
452	34.87	1144.27	741.45	34.87	607.86	30.05	1146.67	736.45	35.97	612.05
453	34.86	1147.84	741.18	34.86	610.97	30.05	1149.63	737.93	35.97	615.01
454	34.85	1149.63	741.05	34.85	612.53	30.05	1149.63	737.93	35.97	615.01
455	34.85	1151.41	740.91	34.85	614.09	28.57	1155.55	734.97	37.45	620.94
456	34.84	1153.2	740.77	34.84	615.64	30.05	1159.99	736.45	37.45	625.38
457	34.83	1156.77	740.5	34.83	618.75	31.53	1170.36	734.97	38.93	625.38
458	34.82	1158.55	740.37	34.82	620.31	31.53	1170.36	734.97	38.93	625.38
459	34.82	1160.33	740.23	34.82	621.86	31.53	1170.36	734.97	38.93	625.38
460	34.81	1162.11	740.1	34.81	623.41	33.01	1174.8	736.45	37.45	628.34
461	34.8	1165.68	739.83	34.8	626.52	33.01	1173.32	736.45	37.45	626.86
462	34.79	1167.46	739.69	34.79	628.07	33.01	1176.28	734.97	38.93	631.3
463	34.78	1169.23	739.56	34.78	629.62	34.49	1177.76	734.97	40.42	628.34
464	34.78	1171.01	739.42	34.78	631.17	33.01	1173.32	734.97	38.93	631.3
465	34.76	1174.57	739.15	34.76	634.27	33.01	1173.32	734.97	38.93	631.3
466	34.76	1176.34	739.01	34.76	635.82	33.01	1173.32	734.97	38.93	631.3
467	34.75	1178.12	738.88	34.75	637.37	33.01	1173.32	734.97	37.45	631.3
468	34.75	1179.9	738.74	34.75	638.91	31.53	1173.32	734.97	37.45	631.3
469	34.73	1183.44	738.47	34.73	642.01	31.53	1192.57	732.01	33.01	649.07
470	34.73	1185.22	738.34	34.73	643.55	31.53	1192.57	732.01	33.01	649.07
471	34.72	1186.99	738.2	34.72	645.1	31.53	1192.57	732.01	33.01	649.07
472	34.71	1188.76	738.07	34.71	646.64	31.53	1192.57	732.01	33.01	649.07
473	34.7	1192.31	737.8	34.7	649.73	31.53	1192.57	732.01	33.01	649.07
474	34.7	1194.08	737.67	34.7	651.27	31.53	1192.57	732.01	33.01	649.07
475	34.69	1195.85	737.53	34.69	652.81	33.01	1194.05	733.49	33.01	656.48
476	34.68	1197.61	737.4	34.68	654.36	33.01	1194.05	733.49	33.01	656.48
477	34.67	1201.15	737.13	34.67	657.44	31.53	1192.57	732.01	33.01	649.07
478	34.66	1202.92	736.99	34.66	658.98	31.53	1192.57	732.01	33.01	649.07
479	34.66	1204.68	736.86	34.66	660.52	31.53	1192.57	732.01	33.01	649.07
480	34.65	1206.45	736.73	34.65	662.06	31.53	1192.57	732.01	33.01	649.07
481	34.64	1208.11	736.53	34.64	665.2	33.01	1194.05	733.49	33.01	656.48
482	34.61	1206.97	753.14	34.61	666.23	33.01	1194.05	733.49	33.01	656.48
483	34.61	1206.87	753.07	34.61	667.83	31.53	1198.5	745.33	38.93	666.85
484	34.6	1206.77	753.01	34.6	669.43	33.01	1198.5	743.85	37.45	671.29
485	34.6	1206.57	752.89	34.6	672.63	31.53	1198.5	746.82	35.97	663.88
486	34.59	1206.47	752.82	34.59	674.23	31.53	1198.5	746.82	35.97	663.88
487	34.59	1206.37	752.76	34.59	675.83	31.53	1198.5	746.82	35.97	663.88
488	34.59	1206.27	752.7	34.59	677.43	33.01	1198.5	746.82	35.97	662.4
489	34.58	1206.07	752.57	34.58	680.63	31.53	1201.46	745.33	33.01	675.73
490	34.58	1205.97	752.51	34.58	682.23	33.01	1201.46	745.33	34.49	675.73
491	34.58	1205.87	752.45	34.58	683.83	33.01	1201.46	745.33	34.49	675.73
492	34.57	1205.77	752.39	34.57	685.43	33.01	1199.98	745.33	34.49	680.17
493	34.57	1205.57	752.26	34.57	688.63	33.01	1199.98	745.33	34.49	680.17
494	34.57	1205.47	752.2	34.57	690.23	33.01	1199.98	745.33	34.49	680.17
495	34.56	1205.37	752.14	34.56	691.82	33.01	1199.98	745.33	34.49	683.14
496	34.56	1205.27	752.08	34.56	693.42	33.01	1199.98	745.33	34.49	683.14
497	34.55	1205.07	751.95	34.55	696.62	34.49	1198.5	743.85	34.49	694.98
498	34.55	1204.97	751.89	34.55	698.21	34.49	1198.5	743.85	34.49	694.98
499	34.55	1204.87	751.83	34.55	699.81	34.49	1198.5	745.33	34.49	696.46
500	34.55	1204.77	751.77	34.55	701.41	34.49	1198.5	745.33	34.49	696.46
501	34.54	1204.57	751.64	34.54	704.6	35.97	1198.5	743.85	33.01	700.91
502	34.54	1204.47	751.58	34.54	706.19	33.01	1198.5	745.33	34.49	706.83
503	34.53	1204.37	751.52	34.53	707.79	33.01	1198.5	745.33	34.49	706.83
504	34.53	1204.27	751.45	34.53	709.38	33.01	1198.5	745.33	34.49	706.83
505	34.53	1204.07	751.33	34.53	712.57	31.53	1199.98	743.85	34.49	712.75
506	34.52	1203.98	751.27	34.52	714.17	30.05	1195.54	742.37	34.49	706.83
507	34.52	1203.88	751.21	34.52	715.76	30.05	1195.54	742.37	34.49	706.83
508	34.52	1203.78	751.14	34.52	717.36	30.05	1197.02	742.37	34.49	709.79
509	34.51	1203.58	751.02	34.51	720.54	34.49	1195.54	742.37	33.01	720.16
510	34.51	1203.48	750.96	34.51	722.14	34.49	1195.54	742.37	33.01	720.16
511	34.51	1203.38	750.9	34.51	723.73	35.97	1197.02	743.85	31.53	723.12
512	34.5	1203.28	750.83	34.5	725.32	35.97	1197.02	743.85	33.01	723.12
513	34.5	1203.08	750.71	34.5	728.5	34.49	1198.5	740.89	33.01	732.01
514	34.49	1202.98	750.65	34.49	730.1	34.49	1198.5	740.89	33.01	732.01
515	34.49	1202.88	750.59	34.49	731.69	34.49	1198.5	742.37	33.01	733.49
516	34.49	1202.78	750.52	34.49	733.28	34.49	1198.5	742.37	33.01	733.49
517	34.48	1202.58	750.4	34.48	736.46	34.49	1197.02	743.85	34.49	733.49
518	34.48	1202.48	750.34	34.48	738.05	34.49	1197.02	743.85	34.49	733.49
519	34.48	1202.39	750.28	34.48	739.64	35.97	1198.5	743.85	34.49	733.49
520	34.47	1202.29	750.21	34.47	741.23	35.97	1198.5	743.85	34.49	733.49
521	34.47	1202.09	750.09	34.47	744.41	35.97	1197.02	745.33	33.01	740.89
522	34.47	1201.99	750.03	34.47	746	34.49	1197.02	743.85	31.53	737.93
523	34.46	1201.89	749.97	34.46	747.59	34.49	1197.02	743.85	31.53	737.93
524	34.46	1201.79	749.9	34.46	749.18	34.49	1197.02	743.85	31.53	737.93
525	34.45	1201.59	749.78	34.45	752.35	34.49	1197.02	743.85	31.53	737.93
526	34.45	1201.49	749.72	34.45	753.94	35.97	1198.5	742.37	34.49	740.89
527	34.45	1201.39	749.66	34.45	755.53	35.97	1198.5	743.85	34.49	743.85
528	34.45	1201.29	749.6	34.45	757.11	35.97	1197.02	740.89	31.53	742.37
529	34.44	1201.1	749.47	34.44	760.29	35.97	1197.02	740.89	31.53	742.37
530	34.44	1201	749.41	34.44	761.87	33.01	1194.05	740.89	33.01	746.82
531	34.43	1200.9	749.35	34.43	763.46	33.01	1194.05	740.89	33.01	746.82
532	34.43	1200.8	749.29	34.43	765.05	33.01	1194.05	740.89	33.01	746.82
533	34.43	1200.6	749.16	34.43	768.22	34.49	1194.05	742.37	31.53	749.78
534	34.42	1200.5	749.1	34.42	769.8	33.01	1194.05	742.37	31.53	749.78
535	34.42	1200.4	749.04	34.42	771.39	33.01	1194.05	742.37	31.53	749.78
536	34.42	1200.3	748.98	34.42	772.97	34.49	1194.05	739.41	34.49	770.51
537	34.41	1200.11	748.85	34.41	776.14	33.01	1194.05	743.85	34.49	769.03
538	34.41	1200.01	748.79	34.41	777.72	33.01	1194.05	743.85	34.49	769.03
539	34.41	1199.91	748.73	34.41	779.31	33.01	1194.05	743.85	34.49	769.03
540	34.4	1199.81	748.67	34.4	780.89	33.01	1194.05	743.85	34.49	769.03
541	34.4	1199.61	748.55	34.4	784.06	34.49	1194.05	739.41	34.49	770.51
542	34.4	1199.51	748.48	34.4	785.64	33.01	1194.05	743.85	31.53	771.99
543	34.39	1199.41	748.42	34.39	787.22	33.01	1194.05	742.37	31.53	777.92
544	34.39	1199.32	748.36	34.39	788.8	34.49	1195.54	742.37	31.53	780.88
545	34.38	1199.12	748.24	34.38	791.97	34.49	1195.54	742.37	31.53	780.88
546	34.38	1199.02	748.18	34.38	793.55	34.49	1195.54	742.37	31.53	780.88
547	34.38	1198.92	748.11	34.38	795.13	34.49	1195.54	742.37	31.53	780.88
548	34.38	1198.82	748.05	34.38	796.71	34.49	1194.05	743.85	33.01	786.8
549	34.37	1198.63	747.93	34.37	799.87	34.49	1191.09	739.41	33.01	797.17
550	34.37	1198.53	747.87	34.37	801.45	34.49	1192.57	737.93	34.49	792.72
551	34.36	1198.43	747.81	34.36	803.03	34.49	1192.57	737.93	33.01	788.28
552	34.36	1198.33	747.75	34.36	804.61	34.49	1192.57	736.45	33.01	811.98
553	34.36	1198.13	747.62	34.36	807.77	34.49	1192.57	736.45	33.01	811.98
554	34.35	1198.03	747.56	34.35	809.34	34.49	1192.57	736.45	33.01	811.98
555	34.35	1197.94	747.5	34.35	810.92	34.49	1192.57	736.45	33.01	810.5
556	34.35	1197.84	747.44	34.35	812.5	34.49	1192.57	736.45	33.01	810.5
557	34.34	1197.64	747.31	34.34	815.66	33.01	1189.61	737.93	31.53	801.61
558	34.34	1197.54	747.25	34.34	817.23	33.01	1189.61	737.93	31.53	801.61
559	34.34	1197.44	747.19	34.34	818.81	33.01	1189.61	736.45	33.01	804.57
560	34.33	1197.34	747.13	34.33	820.39	33.01	1189.61	736.45	33.01	804.57
561	34.33	1197.15	747.01	34.33	823.54	33.01	1189.61	734.97	33.01	810.5
562	34.32	1197.05	746.95	34.32	825.12	33.01	1189.61	734.97	33.01	810.5
563	34.32	1196.95	746.89	34.32	826.69	31.53	1188.13	734.97	33.01	819.38
564	34.32	1196.85	746.82	34.32	828.27	33.01	1188.13	739.41	33.01	822.34
565	34.31	1196.66	746.7	34.31	831.42	33.01	1188.13	740.89	33.01	823.82
566	34.31	1196.56	746.64	34.31	832.99	31.53	1189.61	737.93	31.53	828.27
567	34.31	1196.46	746.58	34.31	834.57	31.53	1189.61	737.93	31.53	828.27
568	34.3	1196.36	746.52	34.3	836.14	31.53	1189.61	734.97	31.53	828.27
569	34.3	1196.16	746.39	34.3	839.29	33.01	1188.13	732.01	33.01	853.44
570	34.3	1196.07	746.33	34.3	840.86	33.01	1188.13	732.01	33.01	853.44
571	34.29	1195.97	746.27	34.29	842.43	33.01	1188.13	733.49	33.01	859.37
572	34.29	1195.87	746.21	34.29	844.01	33.01	1188.13	733.49	33.01	856.4
573	34.29	1195.67	746.09	34.29	847.15	33.01	1188.13	734.97	31.53	835.67
574	34.28	1195.58	746.03	34.28	848.72	33.01	1188.13	734.97	31.53	835.67
575	34.28	1195.48	745.97	34.28	850.3	33.01	1189.61	736.45	31.53	837.15
576	34.28	1195.38	745.9	34.28	851.87	33.01	1189.61	736.45	31.53	837.15
577	34.27	1195.18	745.78	34.27	855.01	33.01	1188.13	740.89	35.97	863.81
578	34.27	1195.08	745.72	34.27	856.58	33.01	1188.13	740.89	35.97	863.81
579	34.27	1194.99	745.66	34.27	858.15	33.01	1188.13	737.93	34.49	862.33
580	34.26	1194.89	745.6	34.26	859.72	33.01	1188.13	737.93	35.97	859.37
581	34.26	1194.69	745.48	34.26	862.86	33.01	1189.61	737.93	34.49	862.33
582	34.25	1194.59	745.41	34.25	864.43	33.01	1189.61	737.93	34.49	862.33
583	34.25	1194.5	745.35	34.25	866	33.01	1189.61	737.93	34.49	862.33
584	34.25	1194.4	745.29	34.25	867.57	31.53	1185.17	732.01	33.01	859.37
585	34.24	1194.2	745.17	34.24	870.71	31.53	1185.17	732.01	33.01	859.37
586	34.24	1194.11	745.11	34.24	872.27	31.53	1186.65	732.01	34.49	854.92
587	34.24	1194.01	745.05	34.24	873.84	31.53	1186.65	732.01	34.49	854.92
588	34.23	1193.91	744.99	34.23	875.41	33.01	1186.65	736.45	35.97	871.21
589	34.23	1193.71	744.87	34.23	878.54	33.01	1186.65	732.01	35.97	863.81
590	34.23	1193.62	744.8	34.23	880.11	31.53	1186.65	739.41	31.53	888.98
591	34.22	1193.52	744.74	34.22	881.68	31.53	1186.65	739.41	31.53	888.98
592	34.22	1193.42	744.68	34.22	883.25	31.53	1186.65	739.41	31.53	888.98
593	34.21	1193.22	744.56	34.21	886.38	31.53	1186.65	739.41	31.53	893.43
594	34.21	1193.13	744.5	34.21	887.94	31.53	1186.65	739.41	31.53	893.43
595	34.21	1193.03	744.44	34.21	889.51	31.53	1186.65	739.41	30.05	890.47
596	34.21	1192.93	744.38	34.21	891.07	33.01	1186.65	739.41	30.05	890.47
597	34.2	1192.74	744.26	34.2	894.2	33.01	1186.65	737.93	31.53	903.79
598	34.2	1192.64	744.19	34.2	895.77	33.01	1186.65	737.93	31.53	903.79
599	34.2	1192.54	744.13	34.2	897.33	33.01	1186.65	737.93	31.53	903.79
600	34.19	1192.44	744.07	34.19	898.9	33.01	1186.65	737.93	31.53	903.79
601	34.19	1192.25	743.95	34.19	902.02	33.01	1186.65	739.41	31.53	902.31
602	34.15	1191.13	743.25	34.15	919.89	33.01	1182.21	736.45	31.53	928.97
603	34.15	1191.04	743.19	34.15	921.45	33.01	1182.21	736.45	31.53	928.97
604	34.15	1190.94	743.13	34.15	923.01	33.01	1182.21	736.45	31.53	928.97
605	34.14	1190.74	743.01	34.14	926.13	33.01	1182.21	736.45	31.53	928.97
606	34.14	1190.65	742.95	34.14	927.69	33.01	1182.21	736.45	31.53	928.97
607	34.14	1190.55	742.89	34.14	929.25	33.01	1182.21	736.45	31.53	928.97
608	34.14	1190.45	742.83	34.14	930.81	33.01	1185.17	736.45	33.01	927.49
609	34.13	1190.26	742.71	34.13	933.92	33.01	1186.65	737.93	34.49	933.41
610	34.13	1190.16	742.65	34.13	935.48	33.01	1186.65	737.93	34.49	933.41
611	34.12	1190.06	742.59	34.12	937.04	34.49	1183.69	733.49	33.01	939.34
612	34.12	1189.96	742.53	34.12	938.6	34.49	1183.69	733.49	33.01	939.34
613	34.12	1189.77	742.4	34.12	941.71	34.49	1183.69	733.49	33.01	939.34
614	34.11	1189.67	742.34	34.11	943.27	34.49	1183.69	733.49	33.01	939.34
615	34.11	1189.58	742.28	34.11	944.82	34.49	1183.69	734.97	34.49	937.85
616	34.11	1189.48	742.22	34.11	946.38	34.49	1183.69	733.49	33.01	939.34
617	34.1	1189.28	742.1	34.1	949.49	34.49	1183.69	733.49	33.01	939.34
618	34.1	1189.19	742.04	34.1	951.05	34.49	1183.69	733.49	33.01	939.34
619	34.1	1189.09	741.98	34.1	952.6	34.49	1183.69	733.49	33.01	939.34
620	34.09	1188.99	741.92	34.09	954.16	34.49	1183.69	733.49	33.01	939.34
621	34.09	1188.8	741.8	34.09	957.27	34.49	1183.69	734.97	34.49	937.85
622	34.09	1188.7	741.74	34.09	958.82	35.97	1179.25	732.01	34.49	955.63
623	34.08	1188.61	741.68	34.08	960.37	35.97	1179.25	733.49	34.49	955.63
624	34.08	1188.51	741.62	34.08	961.93	37.45	1177.76	730.53	35.97	963.03
625	34.07	1188.31	741.5	34.07	965.03	37.45	1177.76	730.53	35.97	963.03
626	34.07	1188.22	741.44	34.07	966.59	37.45	1177.76	730.53	35.97	963.03
627	34.07	1188.12	741.38	34.07	968.14	37.45	1177.76	730.53	35.97	963.03
628	34.07	1188.02	741.31	34.07	969.69	37.45	1177.76	734.97	35.97	965.99
629	34.06	1187.83	741.19	34.06	972.79	38.93	1180.73	734.97	34.49	977.84
630	34.06	1187.73	741.13	34.06	974.35	38.93	1179.25	737.93	33.01	980.8
631	34.05	1187.64	741.07	34.05	975.9	37.45	1177.76	737.93	34.49	982.28
632	34.05	1187.54	741.01	34.05	977.45	37.45	1177.76	737.93	34.49	982.28
633	34.05	1187.35	740.89	34.05	980.55	37.45	1177.76	737.93	34.49	982.28
634	34.04	1187.25	740.83	34.04	982.1	37.45	1177.76	737.93	34.49	982.28
635	34.04	1187.15	740.77	34.04	983.65	37.45	1176.28	736.45	35.97	985.24
636	34.04	1187.06	740.71	34.04	985.2	37.45	1176.28	736.45	35.97	985.24
637	34.03	1186.86	740.59	34.03	988.3	34.49	1180.73	748.3	31.53	985.24
638	34.03	1186.77	740.53	34.03	989.85	35.97	1177.76	745.33	33.01	994.13
639	34.03	1186.67	740.47	34.03	991.4	35.97	1177.76	745.33	33.01	994.13
640	34.02	1186.57	740.41	34.02	992.94	35.97	1177.76	745.33	33.01	994.13
641	34.02	1186.27	742.03	34.02	995.95	35.97	1177.76	746.82	31.53	992.65
642	34.01	1186.07	743.71	34.01	997.41	35.97	1177.76	746.82	31.53	992.65
643	34	1185.86	745.39	34	998.87	37.45	1177.76	739.41	34.49	992.65
644	34	1185.66	747.07	34	1000.32	37.45	1177.76	739.41	34.49	992.65
645	33.99	1185.25	750.42	33.99	1003.23	37.45	1177.76	742.37	34.49	998.57
646	33.98	1185.05	752.1	33.98	1004.69	37.45	1177.76	754.22	35.97	1010.42
647	33.97	1184.85	753.78	33.97	1006.14	37.45	1177.76	754.22	35.97	1010.42
648	33.97	1184.64	755.45	33.97	1007.6	37.45	1177.76	754.22	35.97	1011.9
649	33.96	1184.24	758.81	33.96	1010.5	35.97	1180.73	749.78	35.97	1005.98
650	33.95	1184.03	760.48	33.95	1011.96	35.97	1180.73	749.78	35.97	1005.98
651	33.95	1183.83	762.15	33.95	1013.41	35.97	1180.73	749.78	35.97	1005.98
652	33.94	1183.63	763.83	33.94	1014.86	35.97	1182.21	754.22	33.01	1010.42
653	33.93	1183.22	767.17	33.93	1017.76	35.97	1182.21	757.18	34.49	1011.9
654	33.92	1183.02	768.84	33.92	1019.21	35.97	1182.21	757.18	34.49	1011.9
655	33.92	1182.82	770.51	33.92	1020.66	37.45	1182.21	761.63	34.49	1019.31
656	33.91	1182.61	772.19	33.91	1022.11	34.49	1179.25	767.55	31.53	1022.27
657	33.9	1182.21	775.52	33.9	1025.01	34.49	1179.25	767.55	31.53	1022.27
658	33.89	1182.01	777.19	33.89	1026.45	35.97	1177.76	770.51	31.53	1028.19
659	33.89	1181.8	778.86	33.89	1027.9	35.97	1177.76	773.47	31.53	1031.15
660	33.88	1181.6	780.53	33.88	1029.35	35.97	1177.76	773.47	31.53	1031.15
661	33.87	1181.2	783.86	33.87	1032.24	35.97	1177.76	777.92	31.53	1031.15
662	33.86	1180.99	785.53	33.86	1033.68	35.97	1177.76	777.92	31.53	1031.15
663	33.86	1180.79	787.19	33.86	1035.13	35.97	1177.76	794.21	33.01	1040.04
664	33.85	1180.59	788.86	33.85	1036.57	35.97	1177.76	794.21	33.01	1040.04
665	33.84	1180.19	792.19	33.84	1039.46	34.49	1177.76	794.21	33.01	1037.08
666	33.84	1179.99	793.85	33.84	1040.9	34.49	1176.28	794.21	33.01	1037.08
667	33.83	1179.78	795.51	33.83	1042.34	35.97	1177.76	794.21	35.97	1038.56
668	33.82	1179.58	797.17	33.82	1043.78	34.49	1174.8	804.57	34.49	1053.37
669	33.81	1179.18	800.5	33.81	1046.67	31.53	1171.84	809.01	34.49	1060.77
670	33.81	1178.98	802.16	33.81	1048.11	31.53	1171.84	809.01	34.49	1060.77
671	33.8	1178.78	803.82	33.8	1049.55	31.53	1171.84	809.01	34.49	1060.77
672	33.79	1178.58	805.47	33.79	1050.98	31.53	1173.32	809.01	34.49	1062.25
673	33.78	1178.17	808.79	33.78	1053.86	33.01	1174.8	819.38	30.05	1068.18
674	33.78	1177.97	810.45	33.78	1055.3	33.01	1174.8	819.38	30.05	1068.18
675	33.77	1177.77	812.11	33.77	1056.74	33.01	1173.32	825.3	31.53	1075.58
676	33.77	1177.57	813.76	33.77	1058.17	33.01	1173.32	825.3	31.53	1075.58
677	33.75	1177.17	817.07	33.75	1061.04	33.01	1171.84	820.86	31.53	1068.18
678	33.75	1176.97	818.73	33.75	1062.48	33.01	1171.84	820.86	31.53	1068.18
679	33.74	1176.77	820.38	33.74	1063.91	33.01	1171.84	820.86	31.53	1068.18
680	33.74	1176.57	822.03	33.74	1065.35	33.01	1171.84	820.86	31.53	1068.18
681	33.73	1176.17	825.34	33.73	1068.22	31.53	1170.36	832.71	31.53	1075.58
682	33.72	1175.97	826.99	33.72	1069.65	30.05	1173.32	832.71	30.05	1077.06
683	33.71	1175.76	828.64	33.71	1071.08	30.05	1168.88	843.08	30.05	1087.43
684	33.71	1175.56	830.29	33.71	1072.51	30.05	1168.88	843.08	30.05	1087.43
685	33.7	1175.16	833.59	33.7	1075.37	30.05	1168.88	843.08	30.05	1087.43
686	33.69	1174.96	835.24	33.69	1076.8	30.05	1168.88	843.08	30.05	1087.43
687	33.69	1174.76	836.89	33.69	1078.23	30.05	1168.88	843.08	30.05	1087.43
688	33.68	1174.56	838.54	33.68	1079.66	31.53	1167.4	856.4	30.05	1096.31
689	33.67	1174.16	841.83	33.67	1082.52	31.53	1168.88	844.56	30.05	1090.39
690	33.66	1173.97	843.48	33.66	1083.95	31.53	1168.88	853.44	33.01	1100.76
691	33.66	1173.77	845.12	33.66	1085.38	31.53	1168.88	853.44	33.01	1100.76
692	33.65	1173.57	846.77	33.65	1086.8	31.53	1168.88	853.44	33.01	1100.76
693	33.64	1173.17	850.06	33.64	1089.66	31.53	1168.88	853.44	33.01	1100.76
694	33.63	1172.97	851.7	33.63	1091.08	31.53	1168.88	853.44	33.01	1100.76
695	33.63	1172.77	853.34	33.63	1092.51	31.53	1167.4	856.4	33.01	1102.24
696	33.62	1172.57	854.98	33.62	1093.93	31.53	1167.4	856.4	33.01	1102.24
697	33.61	1172.17	858.27	33.61	1096.78	30.05	1164.44	865.29	31.53	1108.16
698	33.61	1171.97	859.91	33.61	1098.2	30.05	1164.44	865.29	31.53	1108.16
699	33.6	1171.77	861.55	33.6	1099.62	30.05	1164.44	865.29	31.53	1108.16
700	33.59	1171.57	863.19	33.59	1101.05	30.05	1164.44	865.29	31.53	1108.16
701	33.58	1171.18	866.46	33.58	1103.89	30.05	1164.44	878.62	33.01	1114.08
702	33.58	1170.98	868.1	33.58	1105.31	30.05	1164.44	883.06	33.01	1120.01
703	33.57	1170.78	869.74	33.57	1106.73	30.05	1164.44	878.62	33.01	1114.08
704	33.57	1170.58	871.38	33.57	1108.15	30.05	1164.44	878.62	33.01	1114.08
705	33.55	1170.18	874.65	33.55	1110.99	30.05	1164.44	878.62	33.01	1114.08
706	33.55	1169.99	876.28	33.55	1112.4	30.05	1164.44	878.62	33.01	1114.08
707	33.54	1169.79	877.92	33.54	1113.82	30.05	1164.44	878.62	33.01	1114.08
708	33.54	1169.59	879.55	33.54	1115.24	30.05	1164.44	883.06	33.01	1120.01
709	33.53	1169.19	882.82	33.53	1118.07	30.05	1162.96	894.91	34.49	1130.38
710	33.52	1169	884.45	33.52	1119.49	30.05	1164.44	891.95	34.49	1128.89
711	33.51	1168.8	886.08	33.51	1120.9	30.05	1164.44	896.39	34.49	1131.86
712	33.51	1168.6	887.71	33.51	1122.32	30.05	1162.96	900.83	34.49	1137.78
713	33.5	1168.2	890.97	33.5	1125.15	30.05	1162.96	900.83	34.49	1137.78
714	33.49	1168.01	892.6	33.49	1126.56	30.05	1162.96	900.83	34.49	1137.78
715	33.49	1167.81	894.23	33.49	1127.97	30.05	1162.96	900.83	34.49	1137.78
716	33.48	1167.61	895.86	33.48	1129.39	31.53	1162.96	917.12	35.97	1148.15
717	33.47	1167.22	899.11	33.47	1132.21	31.53	1162.96	918.6	34.49	1149.63
718	33.46	1167.02	900.74	33.46	1133.62	31.53	1165.92	918.6	33.01	1148.15
719	33.46	1166.82	902.37	33.46	1135.03	31.53	1165.92	918.6	33.01	1148.15
720	33.45	1166.62	903.99	33.45	1136.44	31.53	1165.92	918.6	33.01	1148.15
721	33.44	1166.23	907.24	33.44	1139.26	31.53	1167.4	923.05	34.49	1152.59
722	33.41	1181.76	908.11	33.41	1139.72	28.57	1168.88	908.24	33.01	1143.7
723	33.4	1181.56	909.73	33.4	1141.12	28.57	1170.36	908.24	33.01	1142.22
724	33.4	1181.36	911.35	33.4	1142.53	28.57	1170.36	906.76	31.53	1142.22
725	33.38	1180.97	914.59	33.38	1145.34	28.57	1165.92	909.72	33.01	1145.18
726	33.38	1180.77	916.21	33.38	1146.75	28.57	1165.92	909.72	33.01	1145.18
727	33.37	1180.57	917.83	33.37	1148.15	28.57	1165.92	909.72	33.01	1145.18
728	33.37	1180.37	919.45	33.37	1149.56	30.05	1170.36	914.16	33.01	1148.15
729	33.36	1179.97	922.69	33.36	1152.36	31.53	1173.32	928.97	33.01	1158.51
730	33.35	1179.77	924.3	33.35	1153.77	31.53	1173.32	928.97	33.01	1158.51
731	33.35	1179.57	925.92	33.35	1155.17	33.01	1174.8	931.93	34.49	1159.99
732	33.34	1179.37	927.54	33.34	1156.57	33.01	1174.8	931.93	34.49	1159.99
733	33.33	1178.98	930.77	33.33	1159.37	33.01	1176.28	933.41	33.01	1161.47
734	33.32	1178.78	932.38	33.32	1160.77	33.01	1176.28	933.41	33.01	1161.47
735	33.32	1178.58	934	33.32	1162.17	33.01	1176.28	936.37	34.49	1164.44
736	33.31	1178.38	935.61	33.31	1163.57	31.53	1171.84	951.18	33.01	1173.32
737	33.3	1177.99	938.83	33.3	1166.37	31.53	1171.84	951.18	33.01	1173.32
738	33.29	1177.79	940.45	33.29	1167.77	31.53	1171.84	951.18	33.01	1173.32
739	33.29	1177.59	942.06	33.29	1169.17	31.53	1170.36	949.7	33.01	1171.84
740	33.28	1177.39	943.67	33.28	1170.56	31.53	1171.84	949.7	33.01	1171.84
741	33.27	1177	946.89	33.27	1173.36	33.01	1171.84	946.74	33.01	1173.32
742	33.27	1176.8	948.5	33.27	1174.75	34.49	1176.28	955.63	31.53	1176.28
743	33.26	1176.6	950.11	33.26	1176.15	33.01	1174.8	960.07	34.49	1185.17
744	33.26	1176.4	951.71	33.26	1177.54	33.01	1174.8	960.07	34.49	1185.17
745	33.24	1176.01	954.93	33.24	1180.33	33.01	1174.8	960.07	34.49	1185.17
746	33.24	1175.81	956.54	33.24	1181.72	33.01	1176.28	967.47	34.49	1188.13
747	33.23	1175.61	958.14	33.23	1183.12	33.01	1176.28	967.47	34.49	1189.61
748	33.23	1175.41	959.75	33.23	1184.51	33.01	1174.8	971.92	34.49	1194.05
749	33.22	1175.02	962.96	33.22	1187.29	33.01	1174.8	973.4	33.01	1194.05
750	33.21	1174.82	964.56	33.21	1188.68	31.53	1174.8	968.95	33.01	1191.09
751	33.21	1174.63	966.16	33.21	1190.07	31.53	1174.8	968.95	33.01	1191.09
752	33.2	1174.43	967.76	33.2	1191.47	31.53	1174.8	968.95	33.01	1191.09
753	33.19	1174.04	970.97	33.19	1194.24	31.53	1174.8	973.4	33.01	1194.05
754	33.18	1173.84	972.57	33.18	1195.63	31.53	1170.36	970.44	31.53	1195.54
755	33.18	1173.64	974.17	33.18	1197.02	31.53	1168.88	968.95	31.53	1192.57
756	33.17	1173.45	975.77	33.17	1198.41	31.53	1168.88	968.95	31.53	1192.57
757	33.16	1173.05	978.97	33.16	1201.18	31.53	1167.4	971.92	31.53	1197.02
758	33.16	1172.86	980.57	33.16	1202.57	31.53	1167.4	971.92	31.53	1197.02
759	33.15	1172.66	982.16	33.15	1203.96	31.53	1167.4	971.92	31.53	1197.02
760	33.14	1172.46	983.76	33.14	1205.34	31.53	1167.4	971.92	31.53	1197.02
761	33.13	1172.07	986.95	33.13	1208.11	33.01	1168.88	979.32	33.01	1201.46
762	33.13	1171.87	988.55	33.13	1209.5	31.53	1168.88	982.28	33.01	1205.9
763	33.12	1171.68	990.15	33.12	1210.88	33.01	1171.84	1000.05	33.01	1219.23
764	33.12	1171.48	991.74	33.12	1212.26	33.01	1171.84	1000.05	33.01	1219.23
765	33.11	1171.09	994.93	33.11	1215.03	33.01	1171.84	1000.05	33.01	1219.23
766	33.1	1170.89	996.52	33.1	1216.41	33.01	1171.84	1000.05	33.01	1219.23
767	33.09	1170.7	998.11	33.09	1217.79	33.01	1171.84	1000.05	33.01	1219.23
768	33.09	1170.5	999.71	33.09	1219.17	31.53	1168.88	1003.02	31.53	1223.67
769	33.08	1170.11	1002.89	33.08	1221.93	33.01	1170.36	1007.46	33.01	1228.12
770	33.07	1169.92	1004.48	33.07	1223.31	31.53	1165.92	1016.34	33.01	1234.04
771	33.07	1169.72	1006.07	33.07	1224.69	31.53	1165.92	1016.34	33.01	1234.04
772	33.06	1169.53	1007.66	33.06	1226.07	31.53	1165.92	1016.34	33.01	1234.04
773	33.05	1169.13	1010.83	33.05	1228.83	31.53	1165.92	1016.34	33.01	1234.04
774	33.04	1168.94	1012.42	33.04	1230.2	31.53	1165.92	1016.34	33.01	1234.04
775	33.04	1168.74	1014.01	33.04	1231.58	31.53	1164.44	1014.86	33.01	1234.04
776	33.03	1168.55	1015.6	33.03	1232.96	31.53	1164.44	1014.86	33.01	1234.04
777	33.02	1168.16	1018.77	33.02	1235.71	31.53	1165.92	1016.34	33.01	1234.04
778	33.02	1167.96	1020.35	33.02	1237.08	31.53	1165.92	1016.34	33.01	1234.04
779	33.01	1167.77	1021.94	33.01	1238.46	31.53	1165.92	1016.34	33.01	1234.04
780	33.01	1167.58	1023.52	33.01	1239.83	31.53	1165.92	1016.34	33.01	1234.04
781	33	1167.19	1026.69	33	1242.58	31.53	1164.44	1014.86	33.01	1234.04
782	32.99	1166.99	1028.27	32.99	1243.95	31.53	1164.44	1014.86	33.01	1234.04
783	32.98	1166.8	1029.85	32.98	1245.32	31.53	1161.47	1032.63	34.49	1247.37
784	32.98	1166.6	1031.43	32.98	1246.69	31.53	1164.44	1032.63	34.49	1248.85
785	32.97	1166.21	1034.59	32.97	1249.44	31.53	1158.51	1028.19	34.49	1248.85
786	32.96	1166.02	1036.17	32.96	1250.81	31.53	1158.51	1028.19	34.49	1248.85
787	32.96	1165.83	1037.75	32.96	1252.18	31.53	1158.51	1028.19	34.49	1248.85
788	32.95	1165.63	1039.33	32.95	1253.55	31.53	1159.99	1029.67	34.49	1250.33
789	32.94	1165.24	1042.49	32.94	1256.28	31.53	1161.47	1045.96	31.53	1256.25
790	32.93	1165.05	1044.06	32.93	1257.65	31.53	1161.47	1043	31.53	1254.77
791	32.93	1164.86	1045.64	32.93	1259.02	31.53	1161.47	1043	31.53	1254.77
792	32.92	1164.66	1047.22	32.92	1260.39	30.05	1158.51	1045.96	31.53	1260.7
793	32.91	1164.27	1050.37	32.91	1263.12	30.05	1158.51	1045.96	31.53	1260.7
794	32.91	1164.08	1051.94	32.91	1264.48	30.05	1158.51	1045.96	31.53	1260.7
795	32.9	1163.89	1053.52	32.9	1265.85	31.53	1161.47	1054.85	31.53	1263.66
796	32.9	1163.69	1055.09	32.9	1267.21	30.05	1158.51	1053.37	33.01	1266.62
797	32.89	1163.31	1058.23	32.89	1269.94	28.57	1161.47	1059.29	34.49	1272.54
798	32.88	1163.11	1059.81	32.88	1271.31	28.57	1161.47	1059.29	34.49	1272.54
799	32.87	1162.92	1061.38	32.87	1272.67	28.57	1161.47	1059.29	34.49	1272.54
800	32.87	1162.73	1062.95	32.87	1274.03	28.57	1161.47	1059.29	34.49	1272.54
801	32.86	1164.21	1066.07	32.86	1275.16	30.05	1162.96	1063.73	33.01	1272.54
802	32.85	1165.88	1067.63	32.85	1274.93	30.05	1162.96	1063.73	33.01	1272.54
803	32.85	1167.55	1069.18	32.85	1274.7	31.53	1170.36	1068.18	34.49	1271.06
804	32.84	1169.22	1070.73	32.84	1274.47	31.53	1173.32	1074.1	34.49	1271.06
805	32.83	1172.56	1073.83	32.83	1274.01	33.01	1174.8	1077.06	33.01	1274.02
806	32.82	1174.22	1075.38	32.82	1273.78	33.01	1174.8	1077.06	33.01	1274.02
807	32.82	1175.89	1076.93	32.82	1273.55	33.01	1174.8	1077.06	33.01	1274.02
808	32.81	1177.56	1078.48	32.81	1273.31	33.01	1179.25	1081.5	33.01	1272.54
809	32.8	1180.89	1081.58	32.8	1272.85	33.01	1179.25	1081.5	33.01	1272.54
810	32.79	1182.55	1083.12	32.79	1272.62	31.53	1177.76	1081.5	33.01	1271.06
811	32.79	1184.22	1084.67	32.79	1272.39	31.53	1182.21	1084.47	31.53	1269.58
812	32.78	1185.88	1086.21	32.78	1272.16	31.53	1182.21	1084.47	31.53	1269.58
813	32.77	1189.21	1089.31	32.77	1271.7	33.01	1191.09	1091.87	31.53	1269.58
814	32.76	1190.87	1090.85	32.76	1271.47	33.01	1191.09	1091.87	31.53	1269.58
815	32.76	1192.53	1092.39	32.76	1271.24	33.01	1192.57	1093.35	31.53	1268.1
816	32.75	1194.19	1093.94	32.75	1271.01	34.49	1199.98	1100.76	30.05	1266.62
817	32.74	1197.51	1097.02	32.74	1270.55	34.49	1202.94	1103.72	31.53	1268.1
818	32.73	1199.17	1098.56	32.73	1270.32	34.49	1202.94	1103.72	31.53	1268.1
819	32.73	1200.83	1100.1	32.73	1270.09	34.49	1202.94	1103.72	31.53	1268.1
820	32.72	1202.48	1101.64	32.72	1269.86	34.49	1201.46	1100.76	31.53	1268.1
821	32.71	1205.8	1104.72	32.71	1269.4	34.49	1204.42	1103.72	31.53	1268.1
822	32.7	1207.45	1106.26	32.7	1269.18	35.97	1208.86	1108.16	33.01	1266.62
823	32.7	1209.11	1107.8	32.7	1268.95	35.97	1208.86	1108.16	33.01	1266.62
824	32.69	1210.76	1109.34	32.69	1268.72	35.97	1208.86	1108.16	33.01	1266.62
825	32.68	1214.07	1112.41	32.68	1268.26	35.97	1208.86	1108.16	33.01	1266.62
826	32.67	1215.72	1113.95	32.67	1268.03	35.97	1208.86	1108.16	33.01	1266.62
827	32.67	1217.38	1115.48	32.67	1267.8	35.97	1216.27	1112.6	33.01	1268.1
828	32.66	1219.03	1117.02	32.66	1267.57	35.97	1214.79	1112.6	33.01	1268.1
829	32.65	1222.33	1120.09	32.65	1267.12	35.97	1226.64	1121.49	33.01	1263.66
830	32.64	1223.98	1121.62	32.64	1266.89	35.97	1226.64	1121.49	33.01	1263.66
831	32.64	1225.63	1123.15	32.64	1266.66	35.97	1226.64	1121.49	33.01	1263.66
832	32.63	1227.28	1124.68	32.63	1266.43	35.97	1223.67	1118.53	31.53	1266.62
833	32.62	1230.57	1127.75	32.62	1265.97	35.97	1228.12	1124.45	33.01	1262.18
834	32.62	1232.22	1129.28	32.62	1265.75	35.97	1228.12	1124.45	33.01	1262.18
835	32.61	1233.87	1130.81	32.61	1265.52	37.45	1234.04	1130.38	33.01	1260.7
836	32.6	1235.51	1132.34	32.6	1265.29	37.45	1234.04	1130.38	33.01	1260.7
837	32.59	1238.8	1135.39	32.59	1264.84	40.42	1242.93	1134.82	31.53	1262.18
838	32.59	1240.45	1136.92	32.59	1264.61	40.42	1242.93	1134.82	31.53	1262.18
839	32.58	1242.09	1138.45	32.58	1264.38	40.42	1241.44	1131.86	30.05	1260.7
840	32.57	1243.73	1139.98	32.57	1264.15	40.42	1241.44	1131.86	30.05	1260.7
841	32.56	1247.02	1143.03	32.56	1263.7	40.42	1237	1128.89	30.05	1260.7
842	48.79	1247.64	1143.62	32.53	1262.44	40.42	1237	1128.89	30.05	1259.22
843	48.79	1249.28	1145.14	32.52	1262.22	43.38	1250.33	1140.74	31.53	1257.73
844	48.78	1250.92	1146.67	32.52	1261.99	43.38	1250.33	1140.74	31.53	1257.73
845	48.76	1254.19	1149.71	32.51	1261.54	43.38	1250.33	1140.74	31.53	1257.73
846	48.75	1255.83	1151.23	32.5	1261.31	43.38	1250.33	1140.74	31.53	1257.73
847	48.74	1257.47	1152.75	32.49	1261.08	43.38	1251.81	1142.22	31.53	1256.25
848	48.73	1259.1	1154.27	32.49	1260.86	43.38	1250.33	1140.74	31.53	1256.25
849	48.72	1262.37	1157.31	32.48	1260.41	43.38	1253.29	1139.26	31.53	1253.29
850	48.71	1264.01	1158.83	32.47	1260.18	43.38	1260.7	1154.07	31.53	1260.7
851	48.7	1265.64	1160.35	32.47	1259.95	43.38	1260.7	1154.07	31.53	1260.7
852	48.69	1267.27	1161.87	32.46	1259.73	43.38	1260.7	1154.07	31.53	1260.7
853	48.67	1270.54	1164.9	32.45	1259.28	43.38	1268.1	1161.47	31.53	1257.73
854	48.66	1272.17	1166.41	32.44	1259.05	43.38	1269.58	1161.47	31.53	1257.73
855	48.66	1273.8	1167.93	32.44	1258.83	43.38	1269.58	1161.47	31.53	1257.73
856	48.65	1275.43	1169.44	32.43	1258.6	44.86	1269.58	1162.96	30.05	1257.73
857	48.63	1278.69	1172.47	32.42	1258.15	49.3	1284.39	1171.84	31.53	1251.81
858	48.62	1280.31	1173.99	32.41	1257.92	49.3	1284.39	1171.84	31.53	1251.81
859	48.61	1281.94	1175.5	32.41	1257.7	49.3	1284.39	1171.84	31.53	1251.81
860	48.6	1283.57	1177.01	32.4	1257.47	49.3	1284.39	1171.84	31.53	1251.81
861	48.59	1286.82	1180.03	32.39	1257.02	47.82	1284.39	1170.36	31.53	1251.81
862	48.58	1288.45	1181.54	32.38	1256.8	47.82	1284.39	1170.36	31.53	1251.81
863	48.57	1290.07	1183.05	32.38	1256.57	49.3	1284.39	1171.84	31.53	1251.81
864	48.56	1291.7	1184.56	32.37	1256.35	49.3	1284.39	1171.84	31.53	1251.81
865	48.54	1294.94	1187.58	32.36	1255.9	49.3	1284.39	1171.84	31.53	1251.81
866	48.53	1296.56	1189.09	32.36	1255.68	49.3	1284.39	1171.84	31.53	1251.81
867	48.52	1298.19	1190.59	32.35	1255.45	49.3	1284.39	1171.84	31.53	1251.81
868	48.52	1299.81	1192.1	32.34	1255.23	47.82	1284.39	1170.36	31.53	1251.81
869	48.5	1303.05	1195.11	32.33	1254.78	47.82	1302.16	1186.65	31.53	1247.37
870	48.49	1304.67	1196.62	32.33	1254.56	47.82	1302.16	1188.13	31.53	1248.85
871	48.48	1306.29	1198.12	32.32	1254.33	46.34	1311.05	1195.54	33.01	1247.37
872	48.47	1307.9	1199.62	32.32	1254.11	46.34	1311.05	1195.54	33.01	1247.37
873	48.46	1311.14	1202.63	32.3	1253.66	46.34	1311.05	1195.54	33.01	1247.37
874	48.45	1312.75	1204.13	32.3	1253.44	46.34	1311.05	1195.54	33.01	1247.37
875	48.44	1314.37	1205.63	32.29	1253.21	46.34	1311.05	1195.54	31.53	1247.37
876	48.43	1315.99	1207.14	32.29	1252.99	46.34	1311.05	1195.54	31.53	1247.37
877	48.41	1319.22	1210.14	32.27	1252.54	47.82	1318.45	1207.38	33.01	1250.33
878	48.4	1320.83	1211.64	32.27	1252.32	47.82	1318.45	1207.38	33.01	1250.33
879	48.4	1322.44	1213.13	32.26	1252.1	47.82	1318.45	1204.42	31.53	1248.85
880	48.39	1324.05	1214.63	32.26	1251.87	47.82	1318.45	1204.42	31.53	1248.85
881	48.37	1327.28	1217.63	32.25	1251.43	47.82	1319.93	1205.9	31.53	1248.85
882	48.36	1328.89	1219.13	32.24	1251.21	47.82	1319.93	1205.9	31.53	1248.85
883	48.35	1330.5	1220.62	32.23	1250.98	44.86	1319.93	1210.34	33.01	1248.85
884	48.34	1332.11	1222.12	32.23	1250.76	44.86	1321.41	1214.79	33.01	1250.33
885	48.33	1335.33	1225.11	32.22	1250.31	44.86	1321.41	1214.79	33.01	1250.33
886	48.32	1336.93	1226.6	32.21	1250.09	46.34	1330.3	1220.71	33.01	1245.89
887	48.31	1338.54	1228.1	32.21	1249.87	46.34	1330.3	1220.71	33.01	1245.89
888	48.3	1340.15	1229.59	32.2	1249.65	46.34	1330.3	1217.75	33.01	1244.41
889	48.28	1343.36	1232.57	32.19	1249.2	46.34	1336.22	1223.67	33.01	1247.37
890	48.27	1344.96	1234.07	32.18	1248.98	46.34	1336.22	1222.19	33.01	1245.89
891	48.27	1346.57	1235.56	32.18	1248.76	46.34	1336.22	1222.19	33.01	1247.37
892	48.26	1348.17	1237.05	32.17	1248.54	46.34	1336.22	1222.19	33.01	1247.37
893	48.24	1351.38	1240.03	32.16	1248.09	47.82	1337.7	1223.67	33.01	1244.41
894	48.23	1352.98	1241.52	32.15	1247.87	47.82	1337.7	1223.67	33.01	1244.41
895	48.22	1354.58	1243	32.15	1247.65	47.82	1340.67	1228.12	33.01	1244.41
896	48.21	1356.18	1244.49	32.14	1247.43	47.82	1340.67	1228.12	33.01	1244.41
897	48.2	1359.38	1247.47	32.13	1246.99	47.82	1359.92	1242.93	33.01	1239.96
898	48.19	1360.98	1248.95	32.13	1246.77	47.82	1359.92	1242.93	33.01	1239.96
899	48.18	1362.58	1250.44	32.12	1246.54	46.34	1359.92	1242.93	33.01	1238.48
900	48.17	1364.18	1251.92	32.11	1246.32	47.82	1361.4	1242.93	31.53	1238.48
901	48.15	1367.38	1254.89	32.1	1245.88	47.82	1365.84	1248.85	33.01	1235.52
902	48.15	1368.97	1256.38	32.1	1245.66	46.34	1361.4	1244.41	34.49	1237
903	48.14	1370.57	1257.86	32.09	1245.44	46.34	1376.21	1257.73	30.05	1239.96
904	48.13	1372.16	1259.34	32.09	1245.22	46.34	1376.21	1257.73	30.05	1239.96
905	48.11	1375.35	1262.3	32.07	1244.78	46.34	1376.21	1257.73	30.05	1239.96
906	48.1	1376.95	1263.79	32.07	1244.56	46.34	1379.17	1260.7	31.53	1238.48
907	48.1	1378.54	1265.27	32.06	1244.34	46.34	1380.65	1262.18	31.53	1237
908	48.09	1380.13	1266.75	32.06	1244.12	46.34	1380.65	1262.18	31.53	1237
909	48.07	1383.32	1269.7	32.05	1243.68	46.34	1380.65	1268.1	31.53	1238.48
910	48.06	1384.91	1271.18	32.04	1243.46	44.86	1370.28	1253.29	31.53	1237
911	48.05	1386.5	1272.66	32.04	1243.24	44.86	1370.28	1253.29	31.53	1237
912	48.04	1388.09	1274.14	32.03	1243.02	44.86	1370.28	1253.29	31.53	1237
913	48.03	1391.26	1277.09	32.02	1242.58	44.86	1376.21	1256.25	31.53	1238.48
914	48.02	1392.85	1278.57	32.01	1242.36	44.86	1376.21	1256.25	31.53	1238.48
915	48.01	1394.44	1280.04	32.01	1242.14	44.86	1374.73	1257.73	30.05	1237
916	48	1396.03	1281.52	32	1241.92	44.86	1377.69	1259.22	30.05	1237
917	47.98	1399.2	1284.47	31.99	1241.48	44.86	1402.87	1285.87	35.97	1237
918	47.98	1400.78	1285.94	31.98	1241.26	44.86	1402.87	1285.87	35.97	1237
919	47.97	1402.37	1287.41	31.98	1241.04	44.86	1402.87	1285.87	35.97	1237
920	47.96	1403.95	1288.88	31.97	1240.82	44.86	1402.87	1285.87	35.97	1237
921	47.94	1407.12	1291.83	31.96	1240.38	44.86	1402.87	1285.87	35.97	1237
922	47.9	1407.58	1292.26	47.9	1239.18	46.34	1410.27	1291.8	38.93	1235.52
923	47.89	1409.16	1293.73	47.89	1238.96	46.34	1414.71	1296.24	44.86	1229.6
924	47.88	1410.74	1295.2	47.88	1238.74	46.34	1414.71	1296.24	44.86	1229.6
925	47.86	1413.9	1298.14	47.86	1238.3	46.34	1414.71	1296.24	44.86	1229.6
926	47.85	1415.48	1299.6	47.85	1238.08	46.34	1417.67	1300.68	46.34	1228.12
927	47.84	1417.05	1301.07	47.84	1237.87	46.34	1417.67	1300.68	46.34	1228.12
928	47.84	1418.63	1302.54	47.84	1237.65	46.34	1417.67	1300.68	46.34	1228.12
929	47.82	1421.79	1305.47	47.82	1237.21	46.34	1420.64	1299.2	46.34	1226.64
930	47.81	1423.36	1306.93	47.81	1236.99	46.34	1422.12	1300.68	46.34	1226.64
931	47.8	1424.94	1308.4	47.8	1236.78	46.34	1422.12	1300.68	46.34	1226.64
932	47.79	1426.51	1309.86	47.79	1236.56	46.34	1422.12	1300.68	46.34	1226.64
933	47.78	1429.66	1312.78	47.78	1236.12	46.34	1422.12	1300.68	46.34	1226.64
934	47.77	1431.23	1314.25	47.77	1235.91	46.34	1422.12	1300.68	46.34	1226.64
935	47.76	1432.8	1315.71	47.76	1235.69	47.82	1422.12	1305.12	44.86	1232.56
936	47.75	1434.38	1317.17	47.75	1235.47	47.82	1426.56	1308.09	44.86	1231.08
937	47.74	1437.52	1320.09	47.74	1235.04	47.82	1442.85	1319.93	47.82	1225.15
938	47.73	1439.09	1321.55	47.73	1234.82	47.82	1442.85	1319.93	47.82	1225.15
939	47.72	1440.66	1323.01	47.72	1234.6	47.82	1442.85	1319.93	47.82	1225.15
940	47.71	1442.23	1324.47	47.71	1234.39	47.82	1442.85	1319.93	47.82	1225.15
941	47.69	1445.36	1327.38	47.69	1233.95	47.82	1448.77	1325.86	49.3	1225.15
942	47.69	1446.93	1328.84	47.69	1233.74	47.82	1448.77	1325.86	49.3	1225.15
943	47.68	1448.5	1330.29	47.68	1233.52	47.82	1442.85	1319.93	47.82	1225.15
944	47.67	1450.07	1331.75	47.67	1233.3	47.82	1442.85	1319.93	47.82	1225.15
945	47.65	1453.2	1334.66	47.65	1232.87	47.82	1442.85	1319.93	47.82	1225.15
946	47.64	1454.76	1336.11	47.64	1232.66	47.82	1442.85	1319.93	47.82	1225.15
947	47.64	1456.33	1337.57	47.64	1232.44	47.82	1442.85	1319.93	47.82	1225.15
948	47.63	1457.89	1339.02	47.63	1232.22	47.82	1448.77	1325.86	49.3	1225.15
949	47.61	1461.02	1341.92	47.61	1231.79	49.3	1457.66	1333.26	46.34	1219.23
950	47.6	1462.58	1343.38	47.6	1231.58	49.3	1457.66	1333.26	46.34	1220.71
951	47.59	1464.14	1344.83	47.59	1231.36	47.82	1462.1	1336.22	47.82	1219.23
952	47.59	1465.7	1346.28	47.59	1231.14	47.82	1462.1	1336.22	47.82	1219.23
953	47.57	1468.82	1349.18	47.57	1230.71	47.82	1462.1	1336.22	47.82	1219.23
954	47.56	1470.38	1350.63	47.56	1230.5	47.82	1462.1	1336.22	47.82	1219.23
955	47.55	1471.94	1352.08	47.55	1230.28	47.82	1466.54	1339.19	47.82	1219.23
956	47.54	1473.5	1353.52	47.54	1230.07	47.82	1466.54	1339.19	47.82	1219.23
957	47.53	1476.61	1356.42	47.53	1229.64	47.82	1462.1	1333.26	46.34	1216.27
958	47.52	1478.17	1357.86	47.52	1229.42	47.82	1478.39	1348.07	46.34	1214.79
959	47.51	1479.72	1359.31	47.51	1229.21	47.82	1478.39	1348.07	46.34	1214.79
960	47.5	1481.28	1360.76	47.5	1228.99	47.82	1478.39	1348.07	46.34	1214.79
961	19.95	2.29	19.95	2.12	1.91	25.35	26.82	22.42	23.89	25.35
962	19.95	4.57	19.95	4.24	3.82	25.35	28.28	20.96	23.89	26.82
963	19.94	6.85	19.94	6.36	5.73	26.82	29.75	20.96	25.35	28.28
964	19.93	9.14	19.93	8.48	7.64	26.82	26.82	22.42	23.89	26.82
965	19.92	13.7	19.92	12.71	11.45	28.28	47.33	26.82	38.54	38.54
966	19.92	15.97	19.92	14.82	13.35	29.75	38.54	26.82	31.21	32.68
967	19.91	18.25	19.91	16.93	15.25	29.75	38.54	26.82	31.21	32.68
968	19.9	20.53	19.9	19.04	17.16	29.75	41.47	25.35	34.14	34.14
969	19.89	25.07	19.89	23.26	20.95	28.28	42.93	23.89	35.61	35.61
970	19.88	27.34	19.88	25.37	22.85	28.28	42.93	23.89	35.61	35.61
971	19.88	29.61	19.88	27.47	24.75	28.28	42.93	23.89	35.61	34.14
972	19.87	31.88	19.87	29.58	26.64	28.28	42.93	23.89	37.07	35.61
973	19.86	36.41	19.86	33.78	30.43	26.82	53.19	23.89	45.86	42.93
974	19.85	38.67	19.85	35.88	32.32	26.82	53.19	23.89	45.86	42.93
975	19.85	40.93	19.85	37.98	34.21	28.28	53.19	23.89	45.86	42.93
976	19.84	43.19	19.84	40.08	36.1	28.28	64.91	20.96	57.58	51.72
977	19.83	47.71	19.83	44.27	39.88	28.28	64.91	20.96	57.58	51.72
978	19.82	49.97	19.82	46.36	41.77	28.28	63.44	19.49	57.58	51.72
979	19.82	52.22	19.82	48.45	43.65	28.28	63.44	19.49	57.58	51.72
980	19.81	54.48	19.81	50.54	45.53	28.28	63.44	19.49	57.58	51.72
981	19.8	58.98	19.8	54.72	49.3	26.82	70.77	20.96	61.98	56.12
982	19.79	61.23	19.79	56.81	51.18	26.82	70.77	20.96	61.98	56.12
983	19.79	63.48	19.79	58.89	53.06	25.35	75.17	22.42	64.91	60.51
984	19.78	65.72	19.78	60.98	54.93	25.35	75.17	22.42	64.91	60.51
985	19.77	70.21	19.77	65.14	58.68	25.35	75.17	22.42	66.38	61.98
986	19.76	72.45	19.76	67.22	60.56	25.35	75.17	22.42	66.38	61.98
987	19.75	74.69	19.75	69.3	62.43	25.35	79.56	22.42	70.77	64.91
988	19.75	76.93	19.75	71.38	64.3	26.82	82.49	22.42	72.24	66.38
989	19.74	81.41	19.74	75.53	68.04	26.82	94.21	22.42	85.42	76.63
990	19.73	83.64	19.73	77.6	69.91	26.82	94.21	22.42	85.42	76.63
991	19.72	85.88	19.72	79.67	71.78	26.82	94.21	22.42	85.42	76.63
992	19.72	88.11	19.72	81.75	73.65	26.82	94.21	22.42	85.42	76.63
993	19.7	92.57	19.7	85.88	77.37	26.82	100.07	22.42	91.28	81.03
994	19.7	94.8	19.7	87.95	79.24	26.82	103	22.42	95.68	83.96
995	19.69	97.03	19.69	90.02	81.1	26.82	103	22.42	95.68	83.96
996	19.69	99.25	19.69	92.08	82.96	25.35	104.47	22.42	95.68	85.42
997	19.67	103.7	19.67	96.21	86.67	25.35	111.79	22.42	104.47	91.28
998	19.67	105.92	19.67	98.27	88.53	25.35	111.79	22.42	104.47	91.28
999	19.66	108.14	19.66	100.33	90.39	25.35	111.79	22.42	104.47	91.28
1000	19.66	110.36	19.66	102.39	92.24	25.35	111.79	22.42	104.47	91.28
1001	19.64	114.79	19.64	106.5	95.95	25.35	117.65	20.96	111.79	95.68
1002	19.64	117	19.64	108.55	97.8	25.35	120.58	20.96	114.72	98.61
1003	19.63	119.22	19.63	110.61	99.65	23.89	132.3	20.96	126.44	110.33
1004	19.63	121.43	19.63	112.66	101.49	23.89	132.3	20.96	126.44	110.33
1005	19.61	125.85	19.61	116.76	105.19	23.89	132.3	20.96	126.44	110.33
1006	19.61	128.06	19.61	118.81	107.03	23.89	132.3	20.96	126.44	110.33
1007	19.6	130.26	19.6	120.85	108.88	23.89	132.3	20.96	126.44	110.33
1008	19.59	132.47	19.59	122.9	110.72	23.89	142.56	22.42	133.77	119.12
1009	19.58	136.87	19.58	126.99	114.4	23.89	141.09	22.42	132.3	117.65
1010	19.58	139.07	19.58	129.03	116.24	23.89	148.42	22.42	139.63	123.51
1011	19.57	141.27	19.57	131.07	118.08	23.89	148.42	22.42	139.63	123.51
1012	19.56	143.47	19.56	133.11	119.92	23.89	148.42	22.42	139.63	123.51
1013	19.55	147.86	19.55	137.18	123.59	23.89	148.42	22.42	139.63	123.51
1014	19.55	150.06	19.55	139.22	125.42	23.89	155.75	22.42	146.96	132.3
1015	19.54	152.25	19.54	141.25	127.25	22.42	157.21	20.96	148.42	132.3
1016	19.53	154.44	19.53	143.29	129.09	20.96	163.07	20.96	155.75	141.09
1017	19.52	158.82	19.52	147.35	132.75	22.42	180.65	23.89	170.4	155.75
1018	19.52	161	19.52	149.38	134.57	22.42	180.65	23.89	170.4	155.75
1019	19.51	163.19	19.51	151.41	136.4	22.42	180.65	23.89	170.4	155.75
1020	19.5	165.37	19.5	153.43	138.23	22.42	180.65	23.89	170.4	155.75
1021	19.49	169.74	19.49	157.48	141.87	19.49	182.12	22.42	171.86	157.21
1022	19.49	171.92	19.49	159.5	143.7	19.49	182.12	22.42	171.86	157.21
1023	19.48	174.1	19.48	161.53	145.52	22.42	180.65	23.89	170.4	155.75
1024	19.47	176.28	19.47	163.55	147.34	22.42	180.65	23.89	170.4	155.75
1025	19.46	180.63	19.46	167.58	150.98	22.42	180.65	23.89	170.4	155.75
1026	19.46	182.8	19.46	169.6	152.79	22.42	180.65	23.89	170.4	155.75
1027	19.45	184.97	19.45	171.62	154.61	22.42	180.65	23.89	170.4	155.75
1028	19.44	187.14	19.44	173.63	156.42	19.49	182.12	22.42	171.86	157.21
1029	19.43	191.48	19.43	177.65	160.05	18.03	204.09	19.49	192.37	174.79
1030	19.43	193.65	19.43	179.66	161.86	18.03	204.09	19.49	192.37	174.79
1031	19.42	195.82	19.42	181.67	163.67	18.03	204.09	19.49	193.84	176.26
1032	19.41	197.98	19.41	183.68	165.48	18.03	204.09	19.49	193.84	176.26
1033	19.4	202.3	19.4	187.69	169.09	18.03	204.09	19.49	193.84	176.26
1034	19.4	204.46	19.4	189.7	170.9	18.03	204.09	19.49	193.84	176.26
1035	19.39	206.62	19.39	191.7	172.7	15.1	211.42	19.49	201.16	185.05
1036	19.38	208.78	19.38	193.7	174.51	15.1	218.74	19.49	207.02	190.91
1037	19.37	213.09	19.37	197.7	178.11	16.56	221.67	18.03	209.95	192.37
1038	19.37	215.25	19.37	199.7	179.91	16.56	221.67	18.03	209.95	192.37
1039	19.36	217.4	19.36	201.7	181.71	16.56	221.67	18.03	209.95	192.37
1040	19.35	219.55	19.35	203.69	183.51	16.56	221.67	18.03	209.95	192.37
1041	19.34	223.85	19.34	207.68	187.1	16.56	224.61	19.49	211.42	193.84
1042	19.34	226	19.34	209.67	188.9	16.56	224.61	19.49	211.42	193.84
1043	19.33	228.14	19.33	211.66	190.69	18.03	242.19	18.03	226.07	209.95
1044	19.32	230.29	19.32	213.65	192.48	18.03	245.12	18.03	227.54	211.42
1045	19.31	234.57	19.31	217.63	196.06	18.03	250.98	19.49	230.47	214.35
1046	19.31	236.71	19.31	219.62	197.85	18.03	250.98	19.49	230.47	214.35
1047	19.3	238.85	19.3	221.6	199.64	18.03	250.98	19.49	230.47	214.35
1048	19.3	240.99	19.3	223.58	201.43	18.03	249.51	19.49	229	214.35
1049	19.28	245.26	19.28	227.55	205	16.56	256.84	22.42	237.79	221.67
1050	19.28	247.39	19.28	229.53	206.78	16.56	256.84	22.42	237.79	221.67
1051	19.27	249.53	19.27	231.51	208.56	16.56	256.84	22.42	237.79	221.67
1052	19.27	251.66	19.27	233.48	210.35	18.03	261.23	19.49	242.19	224.61
1053	19.25	255.92	19.25	237.44	213.91	18.03	261.23	19.49	242.19	224.61
1054	19.25	258.04	19.25	239.41	215.68	18.03	261.23	19.49	242.19	224.61
1055	19.24	260.17	19.24	241.38	217.46	18.03	264.16	19.49	243.65	227.54
1056	19.24	262.3	19.24	243.35	219.24	18.03	264.16	19.49	245.12	227.54
1057	19.22	266.54	19.22	247.29	222.79	18.03	259.77	19.49	243.65	223.14
1058	19.22	268.66	19.22	249.26	224.56	16.56	258.3	18.03	243.65	224.61
1059	19.21	270.78	19.21	251.23	226.33	16.56	258.3	18.03	243.65	224.61
1060	19.21	272.9	19.21	253.19	228.1	16.56	258.3	18.03	243.65	224.61
1061	19.2	277.13	19.2	257.12	231.64	16.56	261.23	18.03	245.12	226.07
1062	19.19	279.25	19.19	259.08	233.41	16.56	261.23	18.03	245.12	226.07
1063	19.18	281.36	19.18	261.04	235.17	16.56	268.56	22.42	252.44	231.93
1064	19.18	283.47	19.18	263	236.94	16.56	268.56	20.96	250.98	231.93
1065	19.17	287.69	19.17	266.92	240.47	16.56	274.42	22.42	255.37	236.33
1066	19.16	289.8	19.16	268.87	242.23	16.56	274.42	22.42	255.37	236.33
1067	19.15	291.91	19.15	270.83	243.99	16.56	274.42	22.42	255.37	236.33
1068	19.15	294.02	19.15	272.78	245.75	18.03	280.28	22.42	261.23	240.72
1069	19.14	298.22	19.14	276.69	249.27	19.49	292	19.49	271.49	252.44
1070	19.13	300.32	19.13	278.64	251.02	22.42	293.46	20.96	271.49	249.51
1071	19.13	302.42	19.13	280.58	252.78	23.89	296.39	20.96	274.42	252.44
1072	19.12	304.52	19.12	282.53	254.53	23.89	296.39	20.96	274.42	252.44
1073	19.11	308.72	19.11	286.42	258.04	18.03	293.46	20.96	274.42	255.37
1074	19.1	310.81	19.1	288.37	259.79	18.03	293.46	20.96	274.42	255.37
1075	19.1	312.91	19.1	290.31	261.54	18.03	299.32	19.49	280.28	259.77
1076	19.09	315	19.09	292.25	263.29	18.03	299.32	19.49	280.28	259.77
1077	19.08	319.18	19.08	296.13	266.79	20.96	302.26	22.42	284.67	262.7
1078	19.07	321.27	19.07	298.07	268.53	20.96	302.26	22.42	284.67	262.7
1079	19.07	323.36	19.07	300.01	270.28	25.35	312.51	20.96	294.93	270.02
1080	19.06	325.45	19.06	301.94	272.02	25.35	312.51	20.96	294.93	270.02
1081	19.05	329.62	19.05	305.81	275.51	26.82	313.98	22.42	297.86	271.49
1082	38.05	331.38	19.03	307.45	276.98	26.82	313.98	22.42	297.86	271.49
1083	38.04	333.46	19.02	309.38	278.72	32.68	328.63	19.49	313.98	283.21
1084	38.03	335.54	19.02	311.31	280.46	32.68	328.63	19.49	313.98	283.21
1085	38.01	339.7	19	315.16	283.93	34.14	331.56	18.03	315.44	284.67
1086	38	341.77	19	317.09	285.66	34.14	331.56	18.03	315.44	284.67
1087	37.99	343.84	18.99	319.01	287.4	34.14	335.95	18.03	316.91	286.14
1088	37.97	345.92	18.99	320.93	289.13	35.61	338.88	18.03	321.3	289.07
1089	37.95	350.06	18.98	324.78	292.59	32.68	330.09	19.49	318.37	289.07
1090	37.94	352.12	18.97	326.69	294.32	32.68	330.09	19.49	318.37	289.07
1091	37.93	354.19	18.96	328.61	296.05	32.68	331.56	19.49	319.84	290.53
1092	37.92	356.26	18.96	330.53	297.77	32.68	331.56	19.49	318.37	290.53
1093	37.89	360.39	18.95	334.36	301.22	32.68	340.35	18.03	325.7	294.93
1094	37.88	362.45	18.94	336.27	302.95	32.68	340.35	18.03	325.7	294.93
1095	37.87	364.51	18.94	338.18	304.67	35.61	344.74	18.03	330.09	297.86
1096	37.86	366.57	18.93	340.1	306.39	35.61	344.74	18.03	330.09	297.86
1097	37.84	370.69	18.92	343.91	309.83	31.21	347.67	18.03	334.49	299.32
1098	37.83	372.74	18.91	345.82	311.55	31.21	352.07	18.03	337.42	303.72
1099	37.81	374.8	18.91	347.73	313.27	31.21	350.6	18.03	337.42	302.26
1100	37.8	376.85	18.9	349.63	314.99	31.21	350.6	18.03	337.42	302.26
1101	37.78	380.95	18.89	353.44	318.42	34.14	357.93	16.56	338.88	305.19
1102	37.77	383	18.88	355.34	320.13	37.07	375.51	18.03	360.86	321.3
1103	37.76	385.05	18.88	357.24	321.84	37.07	375.51	18.03	360.86	321.3
1104	37.75	387.1	18.87	359.14	323.55	37.07	375.51	18.03	360.86	321.3
1105	37.72	391.19	18.86	362.94	326.97	37.07	382.84	19.49	366.72	328.63
1106	37.71	393.23	18.86	364.84	328.68	37.07	384.3	19.49	366.72	330.09
1107	37.7	395.28	18.85	366.73	330.39	37.07	384.3	19.49	366.72	330.09
1108	37.69	397.32	18.85	368.62	332.09	37.07	393.09	18.03	371.11	334.49
1109	37.67	401.4	18.83	372.41	335.5	37.07	388.7	19.49	372.58	333.02
1110	37.66	403.44	18.83	374.3	337.21	34.14	384.3	16.56	366.72	328.63
1111	37.65	405.47	18.82	376.19	338.91	34.14	384.3	16.56	366.72	328.63
1112	37.63	407.51	18.82	378.08	340.61	35.61	388.7	16.56	372.58	334.49
1113	37.61	411.57	18.81	381.85	344.01	34.14	381.37	16.56	369.65	328.63
1114	37.6	413.61	18.8	383.74	345.71	38.54	385.77	19.49	376.97	331.56
1115	37.59	415.64	18.79	385.62	347.4	38.54	390.16	18.03	376.97	334.49
1116	37.58	417.67	18.79	387.5	349.1	41.47	396.02	19.49	379.9	337.42
1117	37.56	421.72	18.78	391.26	352.49	41.47	396.02	19.49	379.9	337.42
1118	37.55	423.75	18.77	393.14	354.18	40	404.81	18.03	384.3	344.74
1119	37.53	425.77	18.77	395.02	355.88	40	404.81	18.03	384.3	344.74
1120	37.52	427.79	18.76	396.9	357.57	40	404.81	18.03	384.3	344.74
1121	37.5	431.88	18.75	398.7	360.98	41.47	410.67	19.49	393.09	350.6
1122	37.5	433.94	18.75	398.62	362.71	41.47	410.67	19.49	393.09	350.6
1123	37.49	436.01	18.74	398.54	364.43	32.68	423.86	16.56	385.77	363.79
1124	37.48	438.07	18.74	398.46	366.15	32.68	423.86	16.56	385.77	363.79
1125	37.47	442.19	18.73	398.3	369.6	34.14	426.79	15.1	385.77	365.25
1126	37.46	444.25	18.73	398.23	371.32	34.14	428.25	15.1	385.77	365.25
1127	37.45	446.3	18.73	398.15	373.04	34.14	428.25	15.1	385.77	365.25
1128	37.45	448.36	18.72	398.07	374.76	32.68	425.32	16.56	381.37	360.86
1129	37.43	452.47	18.72	397.91	378.19	34.14	422.39	16.56	382.84	359.39
1130	37.42	454.53	18.71	397.83	379.91	37.07	444.37	15.1	393.09	378.44
1131	37.42	456.58	18.71	397.76	381.63	37.07	444.37	15.1	393.09	378.44
1132	37.41	458.64	18.7	397.68	383.35	37.07	442.9	15.1	394.56	378.44
1133	37.39	462.74	18.7	397.52	386.78	37.07	442.9	15.1	394.56	378.44
1134	37.39	464.79	18.69	397.44	388.49	38.54	454.62	15.1	390.16	382.84
1135	37.38	466.84	18.69	397.36	390.2	40	457.55	16.56	390.16	384.3
1136	37.37	468.89	18.69	397.29	391.92	40	457.55	16.56	390.16	384.3
1137	37.36	472.99	18.68	397.13	395.34	37.07	450.23	15.1	385.77	384.3
1138	37.35	475.03	18.67	397.05	397.05	37.07	450.23	15.1	385.77	384.3
1139	37.34	477.08	18.67	396.97	398.76	37.07	451.69	16.56	387.23	385.77
1140	37.34	479.13	18.67	396.9	400.47	37.07	451.69	16.56	387.23	385.77
1141	37.32	483.21	18.66	396.74	403.89	38.54	467.81	15.1	388.7	396.02
1142	37.31	485.26	18.66	396.66	405.6	38.54	464.88	15.1	387.23	393.09
1143	37.31	487.3	18.65	396.58	407.3	38.54	473.67	13.63	387.23	396.02
1144	37.3	489.34	18.65	396.51	409.01	38.54	473.67	13.63	387.23	396.02
1145	37.28	493.42	18.64	396.35	412.42	38.54	485.39	13.63	387.23	406.28
1146	37.28	495.46	18.64	396.27	414.12	37.07	481	13.63	387.23	401.88
1147	37.27	497.5	18.63	396.2	415.83	37.07	481	13.63	387.23	401.88
1148	37.26	499.53	18.63	396.12	417.53	37.07	491.25	15.1	387.23	410.67
1149	37.25	503.61	18.62	395.96	420.93	37.07	494.18	15.1	387.23	413.6
1150	37.24	505.64	18.62	395.89	422.63	38.54	502.97	15.1	390.16	423.86
1151	37.23	507.68	18.62	395.81	424.33	38.54	502.97	15.1	390.16	423.86
1152	37.23	509.71	18.61	395.73	426.03	38.54	502.97	15.1	390.16	423.86
1153	37.21	513.77	18.61	395.58	429.43	38.54	510.3	16.56	391.63	428.25
1154	37.2	515.8	18.6	395.5	431.13	38.54	510.3	16.56	391.63	428.25
1155	37.2	517.83	18.6	395.42	432.83	37.07	511.76	18.03	391.63	431.18
1156	37.19	519.86	18.59	395.34	434.52	37.07	514.69	18.03	393.09	434.11
1157	37.17	523.92	18.59	395.19	437.91	37.07	514.69	16.56	385.77	434.11
1158	37.17	525.95	18.58	395.11	439.61	37.07	514.69	16.56	385.77	434.11
1159	37.16	527.97	18.58	395.03	441.3	37.07	514.69	16.56	385.77	434.11
1160	37.15	530	18.58	394.96	442.99	35.61	519.09	18.03	385.77	437.04
1161	37.14	534.05	18.57	394.8	446.38	37.07	522.02	18.03	387.23	439.97
1162	37.13	536.07	18.57	394.73	448.07	38.54	530.81	19.49	385.77	447.3
1163	37.12	538.09	18.56	394.65	449.76	35.61	536.67	15.1	391.63	453.16
1164	37.12	540.11	18.56	394.57	451.45	35.61	536.67	15.1	391.63	453.16
1165	37.1	544.15	18.55	394.42	454.82	35.61	536.67	15.1	391.63	453.16
1166	37.09	546.17	18.55	394.34	456.51	35.61	545.46	16.56	390.16	460.49
1167	37.09	548.19	18.54	394.26	458.2	35.61	544	16.56	390.16	459.02
1168	37.08	550.21	18.54	394.19	459.88	35.61	544	16.56	391.63	459.02
1169	37.07	554.24	18.53	394.03	463.26	35.61	541.07	16.56	384.3	457.55
1170	37.06	556.26	18.53	393.96	464.94	37.07	560.11	18.03	390.16	473.67
1171	37.05	558.27	18.53	393.88	466.62	37.07	560.11	18.03	390.16	473.67
1172	37.04	560.28	18.52	393.8	468.31	37.07	560.11	18.03	390.16	473.67
1173	37.03	564.31	18.51	393.65	471.67	37.07	567.44	18.03	393.09	479.53
1174	37.02	566.32	18.51	393.57	473.35	37.07	567.44	18.03	393.09	481
1175	37.02	568.33	18.51	393.5	475.03	37.07	567.44	18.03	393.09	481
1176	37.01	570.34	18.5	393.42	476.71	38.54	564.51	18.03	394.56	478.07
1177	36.99	574.36	18.5	393.27	480.07	35.61	577.69	18.03	390.16	488.32
1178	36.99	576.36	18.49	393.19	481.75	35.61	577.69	18.03	390.16	488.32
1179	36.98	578.37	18.49	393.11	483.42	35.61	577.69	18.03	390.16	488.32
1180	36.97	580.38	18.49	393.04	485.1	35.61	585.02	19.49	391.63	494.18
1181	36.96	584.38	18.48	392.88	488.45	35.61	585.02	18.03	391.63	494.18
1182	36.95	586.39	18.48	392.81	490.13	35.61	586.48	19.49	391.63	494.18
1183	36.94	588.39	18.47	392.73	491.8	37.07	589.41	18.03	391.63	497.11
1184	36.94	590.39	18.47	392.66	493.47	37.07	589.41	18.03	391.63	497.11
1185	36.92	594.39	18.46	392.5	496.82	37.07	589.41	18.03	391.63	497.11
1186	36.91	596.39	18.46	392.43	498.49	37.07	592.34	18.03	390.16	498.58
1187	36.91	598.39	18.45	392.35	500.16	37.07	590.88	18.03	390.16	498.58
1188	36.9	600.39	18.45	392.27	501.83	37.07	590.88	18.03	390.16	498.58
1189	36.89	604.38	18.44	392.12	505.17	37.07	604.06	19.49	388.7	510.3
1190	36.88	606.38	18.44	392.05	506.83	37.07	626.04	19.49	384.3	522.02
1191	36.87	608.37	18.44	391.97	508.5	37.07	626.04	19.49	384.3	522.02
1192	36.86	610.37	18.43	391.89	510.17	37.07	626.04	19.49	384.3	522.02
1193	36.85	614.35	18.43	391.74	513.5	37.07	628.97	20.96	385.77	524.95
1194	36.84	616.35	18.42	391.67	515.16	37.07	628.97	19.49	385.77	524.95
1195	36.84	618.34	18.42	391.59	516.83	37.07	628.97	19.49	385.77	524.95
1196	36.83	620.33	18.41	391.52	518.49	37.07	634.83	22.42	385.77	526.41
1197	36.81	624.3	18.41	391.36	521.82	37.07	645.09	23.89	385.77	535.2
1198	36.81	626.29	18.4	391.29	523.48	37.07	645.09	23.89	385.77	535.2
1199	36.8	628.28	18.4	391.21	525.14	37.07	645.09	23.89	385.77	535.2
1200	36.79	630.27	18.4	391.14	526.8	37.07	645.09	23.89	385.77	535.2
1201	36.78	634.24	18.39	390.99	530.12	37.07	636.3	25.35	385.77	533.74
1202	36.74	635.64	36.74	390.55	531.29	37.07	642.16	25.35	387.23	538.14
1203	36.73	637.62	36.73	390.48	532.95	37.07	639.23	25.35	387.23	536.67
1204	36.72	639.6	36.72	390.4	534.6	37.07	640.69	26.82	387.23	536.67
1205	36.71	643.56	36.71	390.25	537.91	37.07	640.69	26.82	387.23	536.67
1206	36.7	645.54	36.7	390.17	539.56	37.07	640.69	26.82	387.23	536.67
1207	36.7	647.51	36.7	390.1	541.22	37.07	640.69	26.82	387.23	536.67
1208	36.69	649.49	36.69	390.02	542.87	38.54	650.95	29.75	387.23	542.53
1209	36.67	653.44	36.67	389.87	546.17	37.07	680.25	29.75	388.7	570.37
1210	36.67	655.42	36.67	389.8	547.82	37.07	683.18	29.75	388.7	573.3
1211	36.66	657.39	36.66	389.72	549.47	37.07	678.78	34.14	385.77	563.04
1212	36.65	659.36	36.65	389.65	551.12	37.07	678.78	34.14	385.77	563.04
1213	36.64	663.31	36.64	389.5	554.42	37.07	678.78	34.14	385.77	563.04
1214	36.63	665.28	36.63	389.42	556.07	37.07	678.78	34.14	385.77	563.04
1215	36.62	667.25	36.62	389.35	557.71	37.07	680.25	32.68	387.23	563.04
1216	36.62	669.22	36.62	389.27	559.36	37.07	686.11	29.75	385.77	573.3
1217	36.6	673.16	36.6	389.12	562.65	37.07	705.16	32.68	385.77	585.02
1218	36.6	675.12	36.6	389.05	564.29	37.07	705.16	32.68	385.77	585.02
1219	36.59	677.09	36.59	388.97	565.94	37.07	705.16	32.68	385.77	585.02
1220	36.58	679.05	36.58	388.9	567.58	37.07	705.16	32.68	385.77	585.02
1221	36.57	682.98	36.57	388.75	570.86	37.07	708.09	32.68	382.84	583.55
1222	36.56	684.95	36.56	388.67	572.5	38.54	690.5	29.75	387.23	570.37
1223	36.55	686.91	36.55	388.6	574.14	38.54	700.76	29.75	385.77	580.62
1224	36.55	688.87	36.55	388.52	575.78	38.54	700.76	29.75	385.77	580.62
1225	36.53	692.79	36.53	388.37	579.06	37.07	696.37	28.28	387.23	580.62
1226	36.53	694.75	36.53	388.3	580.7	37.07	696.37	28.28	387.23	580.62
1227	36.52	696.71	36.52	388.23	582.34	37.07	696.37	28.28	387.23	580.62
1228	36.51	698.67	36.51	388.15	583.97	37.07	696.37	28.28	387.23	580.62
1229	36.5	702.58	36.5	388	587.25	38.54	711.02	32.68	379.9	590.88
1230	36.49	704.54	36.49	387.93	588.88	38.54	719.81	32.68	379.9	601.13
1231	36.48	706.49	36.48	387.85	590.51	38.54	718.34	32.68	379.9	599.67
1232	36.48	708.45	36.48	387.78	592.15	37.07	731.53	34.14	382.84	611.39
1233	36.46	712.35	36.46	387.63	595.41	37.07	731.53	34.14	382.84	611.39
1234	36.46	714.31	36.46	387.56	597.04	37.07	731.53	34.14	382.84	611.39
1235	36.45	716.26	36.45	387.48	598.68	37.07	744.71	32.68	381.37	624.58
1236	36.44	718.21	36.44	387.41	600.31	37.07	744.71	32.68	381.37	624.58
1237	36.43	722.11	36.43	387.26	603.56	35.61	741.78	31.21	382.84	623.11
1238	36.42	724.06	36.42	387.18	605.19	35.61	741.78	31.21	382.84	623.11
1239	36.41	726	36.41	387.11	606.82	35.61	741.78	31.21	382.84	623.11
1240	36.41	727.95	36.41	387.04	608.45	35.61	743.25	32.68	384.3	624.58
1241	36.39	731.84	36.39	386.89	611.7	35.61	746.18	34.14	382.84	627.51
1242	36.39	733.79	36.39	386.81	613.33	35.61	747.64	34.14	381.37	627.51
1243	36.38	735.73	36.38	386.74	614.95	32.68	769.62	37.07	379.9	652.41
1244	36.37	737.67	36.37	386.67	616.57	32.68	769.62	37.07	379.9	652.41
1245	36.36	741.56	36.36	386.52	619.82	32.68	768.15	38.54	382.84	652.41
1246	36.35	743.5	36.35	386.44	621.44	32.68	768.15	38.54	382.84	652.41
1247	36.34	745.44	36.34	386.37	623.06	31.21	765.22	32.68	390.16	649.48
1248	36.34	747.38	36.34	386.3	624.69	31.21	763.76	32.68	387.23	648.02
1249	36.32	751.25	36.32	386.15	627.93	31.21	763.76	32.68	376.97	639.23
1250	36.32	753.19	36.32	386.08	629.55	31.21	763.76	32.68	376.97	639.23
1251	36.31	755.13	36.31	386	631.16	31.21	765.22	31.21	379.9	645.09
1252	36.3	757.06	36.3	385.93	632.78	31.21	765.22	31.21	379.9	645.09
1253	36.29	760.93	36.29	385.78	636.02	31.21	772.55	34.14	378.44	648.02
1254	36.28	762.87	36.28	385.71	637.63	31.21	772.55	34.14	378.44	648.02
1255	36.28	764.8	36.28	385.63	639.25	31.21	775.48	34.14	376.97	650.95
1256	36.27	766.73	36.27	385.56	640.86	31.21	775.48	34.14	376.97	650.95
1257	36.25	770.59	36.25	385.41	644.09	31.21	772.55	31.21	379.9	652.41
1258	36.25	772.52	36.25	385.34	645.7	32.68	776.95	32.68	378.44	655.34
1259	36.24	774.45	36.24	385.27	647.32	32.68	778.41	32.68	378.44	656.81
1260	36.23	776.38	36.23	385.19	648.93	32.68	778.41	32.68	378.44	656.81
1261	36.22	780.23	36.22	385.05	652.15	34.14	791.6	32.68	387.23	672.92
1262	36.21	782.16	36.21	384.97	653.76	34.14	791.6	32.68	387.23	672.92
1263	36.21	784.08	36.21	384.9	655.37	32.68	795.99	35.61	379.9	669.99
1264	36.2	786.01	36.2	384.83	656.98	32.68	795.99	35.61	379.9	669.99
1265	36.19	789.86	36.19	384.68	660.19	32.68	795.99	35.61	379.9	669.99
1266	36.18	791.78	36.18	384.61	661.8	32.68	797.46	35.61	379.9	671.46
1267	36.17	793.7	36.17	384.53	663.41	32.68	795.99	35.61	379.9	671.46
1268	36.17	795.62	36.17	384.46	665.01	32.68	795.99	35.61	379.9	671.46
1269	36.15	799.46	36.15	384.31	668.22	32.68	800.39	35.61	390.16	683.18
1270	36.14	801.38	36.14	384.24	669.82	31.21	800.39	29.75	384.3	681.71
1271	36.14	803.3	36.14	384.17	671.43	31.21	800.39	29.75	384.3	681.71
1272	36.13	805.22	36.13	384.09	673.03	31.21	800.39	29.75	384.3	681.71
1273	36.12	809.05	36.12	383.95	676.23	32.68	803.32	31.21	384.3	686.11
1274	36.11	810.96	36.11	383.88	677.83	32.68	804.78	31.21	382.84	686.11
1275	36.1	812.88	36.1	383.8	679.43	32.68	803.32	31.21	382.84	684.64
1276	36.1	814.79	36.1	383.73	681.03	34.14	816.5	34.14	381.37	690.5
1277	36.08	818.62	36.08	383.58	684.23	34.14	817.97	34.14	384.3	694.9
1278	36.08	820.53	36.08	383.51	685.83	34.14	817.97	34.14	384.3	694.9
1279	36.07	822.44	36.07	383.44	687.43	34.14	817.97	34.14	384.3	694.9
1280	36.06	824.35	36.06	383.37	689.02	34.14	817.97	34.14	384.3	694.9
1281	36.05	826.11	36.05	385.14	692.22	34.14	826.76	35.61	390.16	702.23
1282	36.04	825.96	36.04	386.99	693.82	35.61	832.62	35.61	390.16	706.62
1283	36.04	825.81	36.04	388.83	695.42	35.61	828.22	34.14	388.7	703.69
1284	36.03	825.66	36.03	390.67	697.02	32.68	825.29	32.68	397.49	715.41
1285	36.02	825.36	36.02	394.36	700.21	32.68	825.29	32.68	397.49	715.41
1286	36.01	825.21	36.01	396.2	701.81	32.68	825.29	32.68	397.49	715.41
1287	36	825.06	36	398.05	703.41	32.68	825.29	32.68	397.49	715.41
1288	36	824.91	36	399.89	705	34.14	825.29	32.68	393.09	711.02
1289	35.98	824.61	35.98	403.57	708.19	34.14	816.5	37.07	400.42	705.16
1290	35.98	824.46	35.98	405.4	709.78	35.61	817.97	35.61	401.88	712.48
1291	35.97	824.31	35.97	407.24	711.38	35.61	819.43	37.07	401.88	712.48
1292	35.96	824.16	35.96	409.08	712.97	34.14	822.36	34.14	412.14	724.2
1293	35.95	823.86	35.95	412.75	716.16	34.14	822.36	34.14	412.14	724.2
1294	35.94	823.71	35.94	414.59	717.75	34.14	822.36	34.14	412.14	724.2
1295	35.94	823.56	35.94	416.42	719.34	34.14	825.29	34.14	418	730.06
1296	35.93	823.41	35.93	418.26	720.93	34.14	825.29	34.14	418	730.06
1297	35.92	823.11	35.92	421.93	724.11	31.21	820.9	35.61	418	727.13
1298	35.91	822.96	35.91	423.76	725.69	31.21	820.9	37.07	416.53	725.67
1299	35.91	822.81	35.91	425.59	727.28	32.68	822.36	35.61	418	727.13
1300	35.9	822.66	35.9	427.42	728.87	32.68	822.36	35.61	418	727.13
1301	35.89	822.36	35.89	431.08	732.04	32.68	822.36	35.61	420.93	730.06
1302	35.88	822.21	35.88	432.91	733.63	32.68	822.36	35.61	420.93	730.06
1303	35.87	822.07	35.87	434.74	735.21	34.14	829.69	35.61	438.51	752.04
1304	35.87	821.92	35.87	436.56	736.8	32.68	831.15	35.61	444.37	753.5
1305	35.85	821.62	35.85	440.22	739.96	32.68	832.62	37.07	441.44	753.5
1306	35.85	821.47	35.85	442.04	741.54	31.21	823.83	34.14	448.76	759.36
1307	35.84	821.32	35.84	443.87	743.13	31.21	823.83	34.14	448.76	759.36
1308	35.83	821.17	35.83	445.69	744.71	32.68	828.22	34.14	447.3	763.76
1309	35.82	820.88	35.82	449.34	747.87	31.21	822.36	34.14	451.69	759.36
1310	35.81	820.73	35.81	451.16	749.45	31.21	822.36	34.14	451.69	759.36
1311	35.81	820.58	35.81	452.98	751.03	31.21	822.36	34.14	451.69	759.36
1312	35.8	820.43	35.8	454.8	752.61	31.21	816.5	34.14	447.3	753.5
1313	35.79	820.13	35.79	458.44	755.76	31.21	817.97	34.14	447.3	754.97
1314	35.78	819.99	35.78	460.26	757.34	32.68	826.76	37.07	466.35	769.62
1315	35.78	819.84	35.78	462.08	758.92	31.21	823.83	35.61	467.81	769.62
1316	35.77	819.69	35.77	463.9	760.49	31.21	826.76	38.54	473.67	775.48
1317	35.76	819.39	35.76	467.53	763.64	31.21	826.76	38.54	473.67	775.48
1318	35.75	819.24	35.75	469.35	765.21	31.21	826.76	38.54	473.67	775.48
1319	35.74	819.1	35.74	471.16	766.79	31.21	826.76	37.07	472.21	775.48
1320	35.74	818.95	35.74	472.98	768.36	31.21	829.69	37.07	473.67	778.41
1321	35.72	818.65	35.72	476.61	771.5	31.21	825.29	37.07	475.14	774.02
1322	35.69	835.62	35.69	477.99	772.39	31.21	828.22	37.07	476.6	775.48
1323	35.68	835.47	35.68	479.8	773.96	31.21	829.69	34.14	479.53	787.2
1324	35.67	835.32	35.67	481.61	775.52	31.21	829.69	34.14	479.53	787.2
1325	35.66	835.02	35.66	485.23	778.66	31.21	829.69	34.14	479.53	787.2
1326	35.65	834.87	35.65	487.04	780.23	31.21	832.62	35.61	485.39	791.6
1327	35.65	834.72	35.65	488.84	781.79	31.21	832.62	35.61	486.86	791.6
1328	35.64	834.56	35.64	490.65	783.36	31.21	832.62	35.61	486.86	791.6
1329	35.63	834.26	35.63	494.26	786.49	32.68	823.83	35.61	504.44	795.99
1330	35.62	834.11	35.62	496.06	788.05	32.68	823.83	35.61	504.44	795.99
1331	35.61	833.96	35.61	497.87	789.62	32.68	823.83	35.61	504.44	795.99
1332	35.61	833.81	35.61	499.67	791.18	32.68	823.83	35.61	504.44	795.99
1333	35.6	833.51	35.6	503.28	794.3	32.68	823.83	35.61	504.44	795.99
1334	35.59	833.36	35.59	505.08	795.87	32.68	822.36	34.14	514.69	804.78
1335	35.58	833.21	35.58	506.88	797.43	34.14	822.36	34.14	511.76	804.78
1336	35.58	833.06	35.58	508.68	798.99	34.14	822.36	34.14	511.76	804.78
1337	35.56	832.77	35.56	512.28	802.11	32.68	822.36	34.14	514.69	804.78
1338	35.56	832.62	35.56	514.07	803.66	32.68	822.36	34.14	514.69	804.78
1339	35.55	832.47	35.55	515.87	805.22	32.68	822.36	34.14	514.69	804.78
1340	35.54	832.32	35.54	517.67	806.78	32.68	822.36	34.14	514.69	804.78
1341	35.53	832.02	35.53	521.26	809.89	32.68	822.36	37.07	524.95	815.04
1342	35.53	831.87	35.53	523.05	811.45	32.68	822.36	38.54	524.95	817.97
1343	35.52	831.72	35.52	524.85	813	32.68	822.36	38.54	524.95	817.97
1344	35.51	831.57	35.51	526.64	814.56	32.68	822.36	35.61	536.67	825.29
1345	35.5	831.27	35.5	530.23	817.67	32.68	822.36	35.61	536.67	825.29
1346	35.49	831.12	35.49	532.02	819.22	32.68	822.36	35.61	536.67	825.29
1347	35.49	830.97	35.49	533.81	820.77	32.68	822.36	35.61	536.67	825.29
1348	35.48	830.83	35.48	535.6	822.32	32.68	820.9	35.61	538.14	826.76
1349	35.47	830.53	35.47	539.18	825.43	31.21	825.29	34.14	539.6	819.43
1350	35.46	830.38	35.46	540.97	826.98	31.21	823.83	35.61	539.6	819.43
1351	35.46	830.23	35.46	542.75	828.53	32.68	823.83	34.14	545.46	826.76
1352	35.45	830.08	35.45	544.54	830.08	32.68	823.83	34.14	545.46	826.76
1353	35.44	829.78	35.44	548.11	833.17	32.68	823.83	34.14	545.46	826.76
1354	35.43	829.64	35.43	549.9	834.72	32.68	823.83	34.14	545.46	826.76
1355	35.42	829.49	35.42	551.68	836.27	32.68	823.83	34.14	546.93	828.22
1356	35.42	829.34	35.42	553.47	837.81	32.68	823.83	38.54	555.72	842.87
1357	35.4	829.04	35.4	557.03	840.9	32.68	823.83	38.54	557.18	844.34
1358	35.4	828.89	35.4	558.81	842.45	34.14	820.9	37.07	563.04	847.27
1359	35.39	828.75	35.39	560.59	843.99	34.14	820.9	37.07	563.04	847.27
1360	35.39	828.6	35.39	562.38	845.54	34.14	820.9	37.07	563.04	847.27
1361	35.37	828.3	35.37	565.93	848.62	34.14	820.9	37.07	565.97	851.66
1362	35.37	828.15	35.37	567.71	850.16	31.21	819.43	38.54	565.97	850.2
1363	35.36	828.01	35.36	569.49	851.71	31.21	819.43	38.54	565.97	850.2
1364	35.35	827.86	35.35	571.27	853.25	31.21	819.43	40	568.9	851.66
1365	35.34	827.56	35.34	574.82	856.33	31.21	819.43	40	568.9	853.13
1366	35.33	827.41	35.33	576.6	857.87	31.21	819.43	38.54	579.16	861.92
1367	35.33	827.27	35.33	578.37	859.4	31.21	819.43	38.54	579.16	861.92
1368	35.32	827.12	35.32	580.15	860.94	31.21	819.43	38.54	580.62	861.92
1369	35.31	826.82	35.31	583.69	864.02	35.61	819.43	38.54	592.34	875.11
1370	35.3	826.68	35.3	585.47	865.55	35.61	819.43	38.54	592.34	875.11
1371	35.3	826.53	35.3	587.24	867.09	35.61	819.43	38.54	592.34	875.11
1372	35.29	826.38	35.29	589.01	868.62	34.14	820.9	40	596.74	878.04
1373	35.28	826.09	35.28	592.55	871.69	34.14	820.9	40	595.27	876.57
1374	35.27	825.94	35.27	594.32	873.23	34.14	819.43	38.54	609.92	889.76
1375	35.27	825.79	35.27	596.09	874.76	34.14	819.43	38.54	606.99	886.83
1376	35.26	825.65	35.26	597.85	876.29	34.14	819.43	38.54	606.99	886.83
1377	35.25	825.35	35.25	601.39	879.36	32.68	817.97	37.07	602.6	883.9
1378	35.24	825.2	35.24	603.16	880.89	32.68	817.97	37.07	602.6	883.9
1379	35.23	825.06	35.23	604.92	882.42	32.68	817.97	37.07	602.6	883.9
1380	35.23	824.91	35.23	606.69	883.95	32.68	817.97	38.54	612.85	892.69
1381	35.22	824.62	35.22	610.21	887.01	32.68	817.97	38.54	611.39	892.69
1382	35.21	824.47	35.21	611.98	888.53	32.68	817.97	35.61	615.78	889.76
1383	35.2	824.32	35.2	613.74	890.06	32.68	816.5	35.61	628.97	905.87
1384	35.2	824.18	35.2	615.5	891.59	32.68	816.5	35.61	628.97	905.87
1385	35.18	823.88	35.18	619.02	894.64	32.68	816.5	35.61	628.97	905.87
1386	35.18	823.74	35.18	620.78	896.17	32.68	816.5	35.61	628.97	905.87
1387	35.17	823.59	35.17	622.54	897.69	32.68	816.5	35.61	630.44	908.8
1388	35.17	823.45	35.17	624.3	899.22	32.68	816.5	34.14	628.97	908.8
1389	35.15	823.15	35.15	627.81	902.26	31.21	815.04	37.07	636.3	913.2
1390	35.15	823.01	35.15	629.57	903.79	31.21	815.04	37.07	636.3	913.2
1391	35.14	822.86	35.14	631.33	905.31	31.21	815.04	37.07	636.3	913.2
1392	35.13	822.71	35.13	633.08	906.83	31.21	815.04	37.07	636.3	913.2
1393	35.12	822.42	35.12	636.59	909.87	31.21	815.04	37.07	636.3	913.2
1394	35.12	822.28	35.12	638.35	911.39	31.21	815.04	37.07	636.3	913.2
1395	35.11	822.13	35.11	640.1	912.91	31.21	815.04	37.07	639.23	914.66
1396	35.1	821.98	35.1	641.85	914.43	28.28	815.04	34.14	658.27	927.85
1397	35.09	821.69	35.09	645.35	917.47	29.75	810.64	35.61	667.06	942.5
1398	35.08	821.55	35.08	647.1	918.98	29.75	810.64	35.61	667.06	942.5
1399	35.08	821.4	35.08	648.85	920.5	29.75	810.64	35.61	667.06	942.5
1400	35.07	821.26	35.07	650.6	922.02	29.75	810.64	35.61	667.06	942.5
1401	35.06	820.97	35.06	654.1	925.05	32.68	817.97	32.68	646.55	924.92
1402	35.05	820.82	35.05	655.85	926.56	32.68	816.5	32.68	648.02	926.38
1403	35.05	820.68	35.05	657.59	928.08	32.68	816.5	32.68	652.41	927.85
1404	35.04	820.53	35.04	659.34	929.59	34.14	812.11	34.14	693.43	960.08
1405	35.03	820.24	35.03	662.83	932.62	34.14	812.11	34.14	693.43	960.08
1406	35.02	820.09	35.02	664.57	934.13	34.14	812.11	34.14	693.43	960.08
1407	35.02	819.95	35.02	666.32	935.64	34.14	812.11	34.14	693.43	960.08
1408	35.01	819.8	35.01	668.06	937.15	34.14	812.11	34.14	697.83	961.55
1409	35	819.51	35	671.55	940.17	34.14	812.11	34.14	693.43	960.08
1410	34.99	819.37	34.99	673.29	941.68	34.14	812.11	34.14	693.43	960.08
1411	34.99	819.22	34.99	675.03	943.19	34.14	812.11	34.14	693.43	960.08
1412	34.98	819.08	34.98	676.77	944.7	34.14	812.11	34.14	693.43	960.08
1413	34.97	818.79	34.97	680.25	947.71	34.14	812.11	34.14	693.43	960.08
1414	34.96	818.65	34.96	681.98	949.22	34.14	812.11	34.14	693.43	960.08
1415	34.95	818.5	34.95	683.72	950.73	34.14	812.11	34.14	697.83	961.55
1416	34.95	818.36	34.95	685.46	952.23	35.61	817.97	37.07	690.5	964.48
1417	34.94	818.07	34.94	688.93	955.24	34.14	813.57	34.14	697.83	967.41
1418	34.93	817.92	34.93	690.66	956.75	34.14	813.57	34.14	697.83	967.41
1419	34.92	817.78	34.92	692.4	958.25	34.14	813.57	34.14	697.83	967.41
1420	34.92	817.63	34.92	694.13	959.75	34.14	810.64	38.54	703.69	974.73
1421	34.9	817.35	34.9	697.6	962.76	32.68	812.11	38.54	709.55	977.66
1422	34.9	817.2	34.9	699.33	964.26	32.68	812.11	38.54	709.55	977.66
1423	34.89	817.06	34.89	701.06	965.76	31.21	810.64	34.14	728.6	984.99
1424	34.89	816.91	34.89	702.79	967.26	31.21	810.64	34.14	728.6	984.99
1425	34.87	816.63	34.87	706.25	970.26	31.21	810.64	34.14	728.6	984.99
1426	34.87	816.48	34.87	707.98	971.76	31.21	809.18	35.61	740.32	989.38
1427	34.86	816.34	34.86	709.71	973.26	31.21	809.18	35.61	740.32	989.38
1428	34.86	816.2	34.86	711.44	974.75	37.07	813.57	35.61	732.99	986.45
1429	34.84	815.91	34.84	714.89	977.75	34.14	810.64	35.61	722.74	992.31
1430	34.84	815.76	34.84	716.62	979.24	34.14	810.64	35.61	722.74	992.31
1431	34.83	815.62	34.83	718.34	980.74	34.14	810.64	35.61	722.74	992.31
1432	34.83	815.48	34.83	720.07	982.23	34.14	810.64	35.61	722.74	992.31
1433	34.81	815.19	34.81	723.51	985.22	32.68	807.71	35.61	740.32	996.71
1434	34.81	815.05	34.81	725.24	986.72	32.68	807.71	35.61	738.85	995.24
1435	34.8	814.9	34.8	726.96	988.21	32.68	807.71	35.61	738.85	995.24
1436	34.79	814.76	34.79	728.68	989.7	31.21	807.71	32.68	766.69	1002.57
1437	34.78	814.47	34.78	732.12	992.69	32.68	809.18	32.68	746.18	1002.57
1438	34.78	814.33	34.78	733.84	994.18	32.68	809.18	32.68	746.18	1002.57
1439	34.77	814.19	34.77	735.56	995.67	32.68	809.18	32.68	746.18	1002.57
1440	34.76	814.04	34.76	737.28	997.16	32.68	809.18	32.68	746.18	1002.57
1441	34.75	813.83	34.75	740.78	998.55	32.68	809.18	32.68	750.57	1001.1
1442	34.72	813.05	34.72	759.27	997.59	31.21	809.18	34.14	757.9	1001.1
1443	34.72	812.97	34.72	761.05	997.5	34.14	807.71	37.07	759.36	1001.1
1444	34.71	812.9	34.71	762.82	997.41	34.14	807.71	37.07	759.36	1001.1
1445	34.71	812.75	34.71	766.37	997.23	34.14	807.71	37.07	759.36	1001.1
1446	34.71	812.67	34.71	768.15	997.13	34.14	807.71	37.07	759.36	1001.1
1447	34.7	812.6	34.7	769.92	997.04	34.14	807.71	37.07	759.36	1001.1
1448	34.7	812.52	34.7	771.69	996.95	34.14	807.71	37.07	757.9	1001.1
1449	34.69	812.37	34.69	775.24	996.77	32.68	807.71	34.14	784.27	1002.57
1450	34.69	812.3	34.69	777.01	996.68	32.68	806.25	34.14	781.34	1002.57
1451	34.69	812.22	34.69	778.78	996.58	32.68	806.25	34.14	781.34	1002.57
1452	34.68	812.15	34.68	780.55	996.49	32.68	806.25	34.14	781.34	1002.57
1453	34.68	812	34.68	784.1	996.31	32.68	806.25	34.14	781.34	1002.57
1454	34.67	811.92	34.67	785.87	996.22	32.68	806.25	34.14	781.34	1002.57
1455	34.67	811.85	34.67	787.64	996.12	32.68	807.71	34.14	784.27	1002.57
1456	34.67	811.77	34.67	789.41	996.03	31.21	807.71	38.54	790.13	1002.57
1457	34.66	811.62	34.66	792.95	995.85	29.75	803.32	34.14	801.85	1001.1
1458	34.66	811.55	34.66	794.72	995.76	29.75	803.32	34.14	801.85	1001.1
1459	34.65	811.47	34.65	796.49	995.67	29.75	803.32	34.14	801.85	1001.1
1460	34.65	811.4	34.65	798.25	995.57	29.75	803.32	34.14	801.85	1001.1
1461	34.64	811.25	34.64	801.79	995.39	29.75	804.78	35.61	800.39	1001.1
1462	34.64	811.17	34.64	803.56	995.3	31.21	803.32	35.61	828.22	999.64
1463	34.64	811.1	34.64	805.32	995.21	31.21	803.32	35.61	828.22	999.64
1464	34.63	811.02	34.63	807.09	995.12	31.21	803.32	35.61	820.9	998.17
1465	34.63	810.88	34.63	810.62	994.93	31.21	801.85	35.61	816.5	998.17
1466	34.63	810.8	34.63	812.39	994.84	31.21	803.32	34.14	834.08	1001.1
1467	34.62	810.73	34.62	814.16	994.75	31.21	803.32	34.14	834.08	1001.1
1468	34.62	810.65	34.62	815.92	994.66	31.21	804.78	32.68	828.22	1002.57
1469	34.61	810.5	34.61	819.45	994.47	31.21	803.32	34.14	834.08	996.71
1470	34.61	810.43	34.61	821.21	994.38	31.21	803.32	34.14	834.08	996.71
1471	34.61	810.35	34.61	822.98	994.29	32.68	806.25	35.61	837.01	996.71
1472	34.6	810.28	34.6	824.74	994.2	32.68	806.25	35.61	837.01	996.71
1473	34.6	810.13	34.6	828.27	994.02	31.21	807.71	32.68	841.41	998.17
1474	34.59	810.06	34.59	830.03	993.93	31.21	807.71	32.68	841.41	998.17
1475	34.59	809.98	34.59	831.79	993.83	31.21	810.64	32.68	839.94	999.64
1476	34.59	809.91	34.59	833.56	993.74	31.21	810.64	34.14	837.01	999.64
1477	34.58	809.76	34.58	837.08	993.56	32.68	807.71	32.68	858.99	1001.1
1478	34.58	809.68	34.58	838.84	993.47	32.68	810.64	32.68	863.39	1002.57
1479	34.57	809.61	34.57	840.6	993.38	32.68	810.64	32.68	863.39	1002.57
1480	34.57	809.53	34.57	842.36	993.29	31.21	804.78	32.68	873.64	999.64
1481	34.57	809.39	34.57	845.88	993.1	31.21	804.78	32.68	876.57	999.64
1482	34.56	809.31	34.56	847.64	993.01	31.21	804.78	32.68	876.57	999.64
1483	34.56	809.24	34.56	849.4	992.92	32.68	806.25	32.68	864.85	998.17
1484	34.56	809.16	34.56	851.16	992.83	32.68	806.25	32.68	864.85	998.17
1485	34.55	809.01	34.55	854.67	992.65	32.68	806.25	32.68	864.85	998.17
1486	34.55	808.94	34.55	856.43	992.56	32.68	806.25	32.68	872.18	999.64
1487	34.54	808.87	34.54	858.19	992.47	32.68	807.71	32.68	875.11	999.64
1488	34.54	808.79	34.54	859.95	992.38	31.21	804.78	31.21	866.32	993.78
1489	34.53	808.64	34.53	863.46	992.19	31.21	804.78	31.21	863.39	993.78
1490	34.53	808.57	34.53	865.22	992.1	32.68	806.25	34.14	870.71	996.71
1491	34.53	808.49	34.53	866.97	992.01	32.68	806.25	34.14	870.71	996.71
1492	34.52	808.42	34.52	868.73	991.92	32.68	806.25	34.14	870.71	996.71
1493	34.52	808.27	34.52	872.24	991.74	32.68	806.25	34.14	875.11	996.71
1494	34.51	808.2	34.51	873.99	991.65	32.68	806.25	34.14	875.11	996.71
1495	34.51	808.12	34.51	875.75	991.56	29.75	800.39	32.68	883.9	993.78
1496	34.51	808.05	34.51	877.5	991.46	29.75	806.25	32.68	885.36	995.24
1497	34.5	807.9	34.5	881.01	991.28	32.68	804.78	32.68	892.69	995.24
1498	34.5	807.83	34.5	882.76	991.19	32.68	804.78	32.68	892.69	995.24
1499	34.5	807.75	34.5	884.51	991.1	32.68	804.78	32.68	892.69	995.24
1500	34.49	807.68	34.49	886.26	991.01	32.68	804.78	32.68	888.29	993.78
1501	34.49	807.53	34.49	889.77	990.83	32.68	804.78	32.68	888.29	995.24
1502	34.48	807.46	34.48	891.52	990.74	31.21	801.85	32.68	908.8	996.71
1503	34.48	807.38	34.48	893.27	990.65	31.21	801.85	32.68	908.8	996.71
1504	34.48	807.31	34.48	895.02	990.56	31.21	801.85	32.68	908.8	996.71
1505	34.47	807.16	34.47	898.52	990.37	31.21	801.85	32.68	908.8	996.71
1506	34.47	807.09	34.47	900.27	990.28	31.21	801.85	32.68	908.8	996.71
1507	34.46	807.01	34.46	902.02	990.19	31.21	801.85	32.68	908.8	996.71
1508	34.46	806.94	34.46	903.77	990.1	32.68	803.32	32.68	900.01	995.24
1509	34.45	806.79	34.45	907.27	989.92	32.68	806.25	34.14	900.01	995.24
1510	34.45	806.72	34.45	909.01	989.83	32.68	804.78	35.61	919.06	993.78
1511	34.45	806.64	34.45	910.76	989.74	32.68	804.78	35.61	919.06	993.78
1512	34.44	806.57	34.44	912.51	989.65	32.68	804.78	35.61	919.06	993.78
1513	34.44	806.42	34.44	916	989.47	32.68	804.78	35.61	919.06	993.78
1514	34.44	806.35	34.44	917.75	989.38	32.68	804.78	35.61	919.06	993.78
1515	34.43	806.27	34.43	919.5	989.29	32.68	801.85	35.61	930.78	993.78
1516	34.43	806.2	34.43	921.24	989.2	32.68	801.85	35.61	930.78	993.78
1517	34.42	806.05	34.42	924.73	989.02	31.21	800.39	32.68	943.97	993.78
1518	34.42	805.98	34.42	926.48	988.93	31.21	800.39	32.68	943.97	993.78
1519	34.42	805.91	34.42	928.22	988.83	31.21	800.39	32.68	943.97	993.78
1520	34.41	805.83	34.41	929.97	988.74	31.21	800.39	32.68	943.97	993.78
1521	34.41	805.68	34.41	933.45	988.56	31.21	801.85	32.68	943.97	995.24
1522	34.4	805.61	34.4	935.2	988.47	31.21	801.85	32.68	943.97	995.24
1523	34.4	805.54	34.4	936.94	988.38	34.14	804.78	34.14	926.38	993.78
1524	34.4	805.46	34.4	938.68	988.29	32.68	803.32	34.14	923.45	993.78
1525	34.39	805.32	34.39	942.17	988.11	32.68	797.46	34.14	942.5	990.85
1526	34.39	805.24	34.39	943.91	988.02	32.68	797.46	34.14	942.5	990.85
1527	34.38	805.17	34.38	945.65	987.93	32.68	797.46	34.14	942.5	990.85
1528	34.38	805.1	34.38	947.39	987.84	31.21	797.46	34.14	945.43	990.85
1529	34.38	804.95	34.38	950.87	987.66	32.68	806.25	31.21	968.87	992.31
1530	34.37	804.88	34.37	952.61	987.57	32.68	801.85	32.68	964.48	990.85
1531	34.37	804.8	34.37	954.35	987.48	32.68	801.85	32.68	963.01	990.85
1532	34.37	804.73	34.37	956.09	987.39	31.21	798.92	34.14	967.41	992.31
1533	34.36	804.58	34.36	959.57	987.21	31.21	798.92	34.14	967.41	992.31
1534	34.36	804.51	34.36	961.31	987.12	31.21	798.92	34.14	967.41	992.31
1535	34.35	804.43	34.35	963.05	987.03	31.21	800.39	32.68	964.48	990.85
1536	34.35	804.36	34.35	964.79	986.94	32.68	798.92	35.61	963.01	992.31
1537	34.34	804.21	34.34	968.26	986.76	34.14	797.46	35.61	968.87	990.85
1538	34.34	804.14	34.34	970	986.67	32.68	794.53	35.61	973.27	990.85
1539	34.34	804.07	34.34	971.73	986.58	32.68	794.53	35.61	973.27	990.85
1540	34.33	803.99	34.33	973.47	986.49	32.68	794.53	35.61	973.27	990.85
1541	34.33	803.85	34.33	976.94	986.31	32.68	795.99	35.61	979.13	990.85
1542	34.33	803.77	34.33	978.68	986.22	32.68	795.99	35.61	979.13	990.85
1543	34.32	803.7	34.32	980.41	986.13	31.21	798.92	35.61	977.66	992.31
1544	34.32	803.63	34.32	982.15	986.04	31.21	798.92	35.61	977.66	992.31
1545	34.31	803.48	34.31	985.62	985.86	32.68	797.46	35.61	983.52	992.31
1546	34.31	803.41	34.31	987.35	985.77	32.68	797.46	35.61	983.52	992.31
1547	34.31	803.33	34.31	989.08	985.68	32.68	797.46	35.61	983.52	992.31
1548	34.3	803.26	34.3	990.82	985.59	31.21	800.39	34.14	1004.03	987.92
1549	34.3	803.11	34.3	994.28	985.41	31.21	800.39	34.14	998.17	989.38
1550	34.29	803.04	34.29	996.01	985.32	32.68	795.99	34.14	990.85	989.38
1551	34.29	802.97	34.29	997.75	985.23	32.68	795.99	34.14	990.85	989.38
1552	34.29	802.9	34.29	999.48	985.14	32.68	795.99	34.14	990.85	989.38
1553	34.28	802.75	34.28	1002.94	984.96	32.68	795.99	34.14	996.71	990.85
1554	34.28	802.68	34.28	1004.67	984.87	32.68	797.46	34.14	995.24	990.85
1555	34.28	802.6	34.28	1006.4	984.78	31.21	798.92	35.61	996.71	992.31
1556	34.27	802.53	34.27	1008.13	984.69	31.21	798.92	35.61	990.85	990.85
1557	34.27	802.38	34.27	1011.59	984.51	34.14	797.46	34.14	1030.41	993.78
1558	34.26	802.31	34.26	1013.32	984.42	34.14	797.46	34.14	1030.41	993.78
1559	34.26	802.24	34.26	1015.05	984.33	34.14	797.46	34.14	1030.41	993.78
1560	34.26	802.16	34.26	1016.78	984.24	34.14	797.46	34.14	1030.41	993.78
1561	34.25	802.02	34.25	1020.23	984.06	34.14	795.99	34.14	1031.87	992.31
1562	34.22	801.26	34.22	1021.09	1000.24	34.14	795.99	34.14	1037.73	996.71
1563	34.21	801.19	34.21	1022.81	1000.15	34.14	795.99	34.14	1037.73	996.71
1564	34.21	801.11	34.21	1024.54	1000.06	34.14	795.99	34.14	1037.73	996.71
1565	34.21	800.97	34.21	1027.99	999.88	34.14	795.99	34.14	1037.73	996.71
1566	34.2	800.89	34.2	1029.71	999.79	34.14	795.99	34.14	1037.73	996.71
1567	34.2	800.82	34.2	1031.44	999.7	34.14	795.99	34.14	1037.73	996.71
1568	34.2	800.75	34.2	1033.16	999.61	35.61	790.13	34.14	1026.01	992.31
1569	34.19	800.6	34.19	1036.61	999.42	35.61	791.6	32.68	1021.62	993.78
1570	34.19	800.53	34.19	1038.33	999.33	35.61	791.6	35.61	1049.45	996.71
1571	34.18	800.46	34.18	1040.05	999.24	35.61	791.6	35.61	1049.45	996.71
1572	34.18	800.39	34.18	1041.77	999.15	35.61	791.6	35.61	1049.45	996.71
1573	34.17	800.24	34.17	1045.22	998.97	35.61	791.6	35.61	1049.45	996.71
1574	34.17	800.17	34.17	1046.94	998.88	35.61	791.6	35.61	1049.45	996.71
1575	34.17	800.09	34.17	1048.66	998.79	35.61	791.6	35.61	1056.78	995.24
1576	34.17	800.02	34.17	1050.38	998.7	35.61	791.6	35.61	1049.45	996.71
1577	34.16	799.88	34.16	1053.82	998.52	35.61	791.6	35.61	1049.45	996.71
1578	34.16	799.8	34.16	1055.54	998.43	35.61	791.6	35.61	1049.45	996.71
1579	34.15	799.73	34.15	1057.26	998.34	35.61	791.6	35.61	1049.45	996.71
1580	34.15	799.66	34.15	1058.98	998.24	35.61	791.6	35.61	1049.45	996.71
1581	34.14	799.51	34.14	1062.42	998.06	35.61	791.6	35.61	1056.78	995.24
1582	34.14	799.44	34.14	1064.14	997.97	35.61	793.06	34.14	1053.85	995.24
1583	34.14	799.37	34.14	1065.85	997.88	35.61	793.06	35.61	1061.17	995.24
1584	34.13	799.3	34.13	1067.57	997.79	35.61	791.6	35.61	1059.71	995.24
1585	34.13	799.15	34.13	1071.01	997.61	32.68	797.46	37.07	1072.89	995.24
1586	34.12	799.08	34.12	1072.72	997.52	32.68	797.46	37.07	1072.89	995.24
1587	34.12	799.01	34.12	1074.44	997.43	32.68	797.46	37.07	1072.89	995.24
1588	34.12	798.93	34.12	1076.16	997.34	32.68	795.99	35.61	1067.03	993.78
1589	34.11	798.79	34.11	1079.59	997.16	31.21	801.85	37.07	1091.94	996.71
1590	34.11	798.72	34.11	1081.3	997.07	31.21	800.39	35.61	1084.61	996.71
1591	34.11	798.64	34.11	1083.02	996.98	32.68	800.39	35.61	1084.61	996.71
1592	34.1	798.57	34.1	1084.73	996.89	31.21	798.92	37.07	1099.27	995.24
1593	34.1	798.43	34.1	1088.16	996.71	31.21	798.92	37.07	1099.27	995.24
1594	34.09	798.35	34.09	1089.87	996.62	31.21	798.92	37.07	1099.27	995.24
1595	34.09	798.28	34.09	1091.59	996.53	29.75	801.85	37.07	1100.73	995.24
1596	34.09	798.21	34.09	1093.3	996.44	32.68	794.53	37.07	1094.87	996.71
1597	34.08	798.07	34.08	1096.72	996.26	32.68	793.06	37.07	1096.34	995.24
1598	34.08	797.99	34.08	1098.44	996.17	32.68	793.06	35.61	1093.41	995.24
1599	34.08	797.92	34.08	1100.15	996.08	32.68	800.39	37.07	1102.2	998.17
1600	34.07	797.85	34.07	1101.86	995.99	32.68	800.39	37.07	1102.2	998.17
1601	34.06	799.58	34.06	1105.17	995.71	31.21	800.39	37.07	1106.59	998.17
1602	34.06	801.38	34.06	1106.78	995.52	31.21	800.39	37.07	1106.59	998.17
1603	34.05	803.18	34.05	1108.38	995.33	31.21	806.25	35.61	1118.31	995.24
1604	34.04	804.98	34.04	1109.98	995.15	31.21	806.25	35.61	1118.31	995.24
1605	34.03	808.58	34.03	1113.18	994.77	29.75	807.71	35.61	1118.31	993.78
1606	34.02	810.37	34.02	1114.78	994.59	31.21	803.32	37.07	1113.92	993.78
1607	34.02	812.17	34.02	1116.38	994.4	31.21	803.32	37.07	1113.92	993.78
1608	34.01	813.97	34.01	1117.98	994.21	31.21	806.25	37.07	1118.31	993.78
1609	34	817.56	34	1121.17	993.84	31.21	820.9	35.61	1130.03	992.31
1610	33.99	819.35	33.99	1122.77	993.65	31.21	820.9	35.61	1130.03	992.31
1611	33.99	821.14	33.99	1124.36	993.47	31.21	820.9	35.61	1130.03	992.31
1612	33.98	822.94	33.98	1125.96	993.28	29.75	823.83	35.61	1132.96	993.78
1613	33.97	826.52	33.97	1129.15	992.91	28.28	832.62	35.61	1137.36	993.78
1614	33.96	828.31	33.96	1130.74	992.72	28.28	832.62	35.61	1137.36	993.78
1615	33.95	830.1	33.95	1132.33	992.53	28.28	837.01	35.61	1143.22	992.31
1616	33.95	831.89	33.95	1133.92	992.35	28.28	837.01	35.61	1143.22	992.31
1617	33.94	835.46	33.94	1137.11	991.98	29.75	841.41	35.61	1146.15	989.38
1618	33.93	837.25	33.93	1138.7	991.79	29.75	841.41	35.61	1146.15	989.38
1619	33.92	839.04	33.92	1140.29	991.6	29.75	841.41	35.61	1146.15	989.38
1620	33.92	840.82	33.92	1141.88	991.42	29.75	842.87	37.07	1147.61	990.85
1621	33.9	844.39	33.9	1145.05	991.05	31.21	841.41	37.07	1143.22	990.85
1622	33.9	846.18	33.9	1146.64	990.86	31.21	838.48	38.54	1141.75	990.85
1623	33.89	847.96	33.89	1148.23	990.68	28.28	848.73	37.07	1152.01	993.78
1624	33.88	849.74	33.88	1149.81	990.49	28.28	848.73	37.07	1152.01	993.78
1625	33.87	853.31	33.87	1152.98	990.12	28.28	848.73	37.07	1152.01	993.78
1626	33.87	855.09	33.87	1154.57	989.94	28.28	848.73	37.07	1152.01	993.78
1627	33.86	856.87	33.86	1156.15	989.75	28.28	858.99	37.07	1162.26	992.31
1628	33.85	858.65	33.85	1157.74	989.57	28.28	858.99	37.07	1162.26	992.31
1629	33.84	862.2	33.84	1160.9	989.2	31.21	856.06	35.61	1156.4	989.38
1630	33.83	863.98	33.83	1162.48	989.01	31.21	860.46	37.07	1166.66	986.45
1631	33.83	865.76	33.83	1164.06	988.83	31.21	860.46	37.07	1166.66	986.45
1632	33.82	867.53	33.82	1165.64	988.64	31.21	860.46	37.07	1166.66	986.45
1633	33.81	871.08	33.81	1168.8	988.27	31.21	860.46	37.07	1166.66	986.45
1634	33.8	872.86	33.8	1170.38	988.09	31.21	860.46	37.07	1166.66	986.45
1635	33.8	874.63	33.8	1171.96	987.9	31.21	863.39	37.07	1165.19	987.92
1636	33.79	876.4	33.79	1173.54	987.72	31.21	860.46	37.07	1166.66	986.45
1637	33.78	879.95	33.78	1176.69	987.35	31.21	860.46	37.07	1166.66	986.45
1638	33.77	881.72	33.77	1178.26	987.17	31.21	860.46	37.07	1166.66	986.45
1639	33.76	883.49	33.76	1179.84	986.98	31.21	860.46	37.07	1166.66	986.45
1640	33.76	885.26	33.76	1181.41	986.8	31.21	860.46	37.07	1166.66	986.45
1641	33.75	888.79	33.75	1184.56	986.43	31.21	863.39	37.07	1165.19	987.92
1642	33.74	890.56	33.74	1186.13	986.25	32.68	892.69	34.14	1193.03	984.99
1643	33.73	892.33	33.73	1187.71	986.06	32.68	891.22	35.61	1190.1	984.99
1644	33.73	894.09	33.73	1189.28	985.88	34.14	904.41	34.14	1206.22	983.52
1645	33.71	897.62	33.71	1192.42	985.51	34.14	904.41	34.14	1206.22	983.52
1646	33.71	899.39	33.71	1193.99	985.33	34.14	904.41	34.14	1206.22	983.52
1647	33.7	901.15	33.7	1195.56	985.15	34.14	904.41	34.14	1206.22	983.52
1648	33.7	902.91	33.7	1197.13	984.96	34.14	907.34	35.61	1206.22	983.52
1649	33.68	906.44	33.68	1200.26	984.6	32.68	913.2	32.68	1213.54	984.99
1650	33.68	908.2	33.68	1201.83	984.41	32.68	910.27	34.14	1210.61	984.99
1651	33.67	909.96	33.67	1203.39	984.23	32.68	910.27	34.14	1209.15	984.99
1652	33.66	911.72	33.66	1204.96	984.05	32.68	921.99	32.68	1219.4	983.52
1653	33.65	915.23	33.65	1208.09	983.68	32.68	921.99	32.68	1219.4	983.52
1654	33.65	916.99	33.65	1209.65	983.5	32.68	921.99	32.68	1219.4	983.52
1655	33.64	918.75	33.64	1211.22	983.32	32.68	926.38	34.14	1223.8	984.99
1656	33.63	920.51	33.63	1212.78	983.13	35.61	916.13	35.61	1212.08	984.99
1657	33.62	924.02	33.62	1215.9	982.77	35.61	924.92	34.14	1217.94	984.99
1658	33.61	925.77	33.61	1217.46	982.58	35.61	926.38	34.14	1220.87	984.99
1659	33.61	927.52	33.61	1219.02	982.4	34.14	927.85	35.61	1220.87	980.59
1660	33.6	929.28	33.6	1220.58	982.22	34.14	927.85	35.61	1220.87	980.59
1661	33.59	932.78	33.59	1223.7	981.86	35.61	927.85	35.61	1223.8	980.59
1662	33.58	934.53	33.58	1225.26	981.67	35.61	927.85	35.61	1223.8	980.59
1663	33.58	936.28	33.58	1226.82	981.49	32.68	943.97	34.14	1236.98	982.06
1664	33.57	938.03	33.57	1228.37	981.31	32.68	941.04	34.14	1235.52	982.06
1665	33.56	941.53	33.56	1231.49	980.95	34.14	952.76	34.14	1245.77	982.06
1666	33.55	943.28	33.55	1233.04	980.76	34.14	952.76	34.14	1245.77	982.06
1667	33.55	945.02	33.55	1234.6	980.58	34.14	952.76	34.14	1245.77	982.06
1668	33.54	946.77	33.54	1236.15	980.4	34.14	960.08	32.68	1250.17	982.06
1669	33.53	950.26	33.53	1239.26	980.04	35.61	960.08	35.61	1254.57	976.2
1670	33.52	952.01	33.52	1240.81	979.86	35.61	960.08	35.61	1254.57	976.2
1671	33.51	953.75	33.51	1242.36	979.68	35.61	965.94	35.61	1256.03	977.66
1672	33.51	955.49	33.51	1243.91	979.49	35.61	965.94	35.61	1256.03	977.66
1673	33.5	958.98	33.5	1247.01	979.13	37.07	977.66	34.14	1270.68	974.73
1674	33.49	960.72	33.49	1248.56	978.95	37.07	977.66	34.14	1270.68	974.73
1675	33.48	962.46	33.48	1250.11	978.77	37.07	979.13	34.14	1273.61	973.27
1676	33.48	964.2	33.48	1251.66	978.59	37.07	982.06	34.14	1275.08	973.27
1677	33.46	967.68	33.46	1254.75	978.23	37.07	970.34	37.07	1264.82	976.2
1678	33.46	969.42	33.46	1256.3	978.05	37.07	970.34	37.07	1264.82	976.2
1679	33.45	971.15	33.45	1257.85	977.87	38.54	980.59	37.07	1272.15	976.2
1680	33.45	972.89	33.45	1259.39	977.68	37.07	980.59	37.07	1270.68	974.73
1681	33.43	976.36	33.43	1262.48	977.32	37.07	979.13	35.61	1269.22	977.66
1682	50.1	977.28	33.4	1262.97	976.33	37.07	979.13	35.61	1269.22	977.66
1683	50.09	979.01	33.39	1264.51	976.15	42.93	974.73	32.68	1267.75	977.66
1684	50.08	980.74	33.39	1266.05	975.97	42.93	974.73	32.68	1267.75	977.66
1685	50.06	984.21	33.38	1269.13	975.61	42.93	974.73	32.68	1267.75	977.66
1686	50.05	985.94	33.37	1270.67	975.43	44.4	987.92	34.14	1278.01	976.2
1687	50.04	987.67	33.36	1272.21	975.25	44.4	987.92	34.14	1278.01	976.2
1688	50.04	989.4	33.36	1273.75	975.07	44.4	999.64	32.68	1288.26	977.66
1689	50.02	992.85	33.34	1276.83	974.71	44.4	999.64	32.68	1288.26	977.66
1690	50.01	994.58	33.34	1278.37	974.53	45.86	1001.1	34.14	1289.73	971.8
1691	50	996.31	33.33	1279.9	974.35	45.86	1001.1	34.14	1289.73	971.8
1692	49.99	998.03	33.33	1281.44	974.17	45.86	1001.1	34.14	1289.73	971.8
1693	49.97	1001.48	33.31	1284.51	973.81	45.86	1001.1	34.14	1291.19	971.8
1694	49.96	1003.21	33.31	1286.04	973.63	45.86	1004.03	34.14	1292.66	973.27
1695	49.95	1004.93	33.3	1287.58	973.45	44.4	1004.03	32.68	1289.73	973.27
1696	49.94	1006.65	33.3	1289.11	973.28	44.4	1008.43	32.68	1291.19	973.27
1697	49.92	1010.1	33.28	1292.17	972.92	45.86	1015.76	32.68	1299.98	971.8
1698	49.92	1011.82	33.28	1293.7	972.74	45.86	1015.76	32.68	1299.98	971.8
1699	49.91	1013.54	33.27	1295.23	972.56	45.86	1015.76	32.68	1299.98	971.8
1700	49.9	1015.26	33.26	1296.76	972.38	45.86	1015.76	32.68	1299.98	971.8
1701	49.88	1018.69	33.25	1299.82	972.02	44.4	1017.22	32.68	1301.45	973.27
1702	49.87	1020.41	33.25	1301.35	971.85	44.4	1017.22	32.68	1301.45	973.27
1703	49.86	1022.13	33.24	1302.88	971.67	45.86	1015.76	32.68	1299.98	971.8
1704	49.85	1023.85	33.23	1304.41	971.49	45.86	1015.76	32.68	1299.98	971.8
1705	49.83	1027.28	33.22	1307.46	971.13	45.86	1015.76	32.68	1299.98	971.8
1706	49.82	1028.99	33.22	1308.99	970.96	45.86	1015.76	32.68	1299.98	971.8
1707	49.81	1030.7	33.21	1310.51	970.78	45.86	1015.76	32.68	1299.98	971.8
1708	49.81	1032.42	33.2	1312.04	970.6	44.4	1017.22	32.68	1301.45	973.27
1709	49.79	1035.84	33.19	1315.08	970.24	45.86	1027.48	34.14	1308.77	974.73
1710	49.78	1037.55	33.19	1316.61	970.07	45.86	1037.73	34.14	1316.1	974.73
1711	49.77	1039.27	33.18	1318.13	969.89	45.86	1039.2	34.14	1317.56	974.73
1712	49.76	1040.98	33.17	1319.65	969.71	48.79	1052.38	32.68	1329.29	970.34
1713	49.74	1044.39	33.16	1322.69	969.35	48.79	1052.38	32.68	1329.29	970.34
1714	49.73	1046.1	33.16	1324.21	969.18	48.79	1052.38	32.68	1329.29	970.34
1715	49.72	1047.81	33.15	1325.73	969	48.79	1055.31	32.68	1329.29	970.34
1716	49.71	1049.52	33.14	1327.25	968.82	44.4	1053.85	32.68	1333.68	971.8
1717	49.7	1052.93	33.13	1330.29	968.47	44.4	1047.99	32.68	1332.22	970.34
1718	49.69	1054.63	33.12	1331.81	968.29	45.86	1055.31	32.68	1338.08	965.94
1719	49.68	1056.34	33.12	1333.32	968.11	45.86	1055.31	32.68	1338.08	965.94
1720	49.67	1058.04	33.11	1334.84	967.94	45.86	1055.31	32.68	1338.08	965.94
1721	49.65	1061.45	33.1	1337.87	967.58	45.86	1058.24	34.14	1338.08	968.87
1722	49.64	1063.15	33.09	1339.38	967.41	45.86	1059.71	35.61	1336.61	965.94
1723	49.63	1064.85	33.09	1340.9	967.23	47.33	1064.1	35.61	1341.01	967.41
1724	49.62	1066.55	33.08	1342.41	967.05	47.33	1062.64	35.61	1339.54	967.41
1725	49.61	1069.95	33.07	1345.44	966.7	48.79	1067.03	34.14	1345.4	964.48
1726	49.6	1071.65	33.06	1346.95	966.52	48.79	1067.03	34.14	1345.4	964.48
1727	49.59	1073.35	33.06	1348.46	966.35	48.79	1067.03	34.14	1345.4	964.48
1728	49.58	1075.05	33.05	1349.97	966.17	48.79	1075.82	35.61	1349.8	967.41
1729	49.56	1078.44	33.04	1352.99	965.82	45.86	1089.01	34.14	1362.98	964.48
1730	49.55	1080.14	33.03	1354.5	965.64	45.86	1089.01	34.14	1362.98	964.48
1731	49.54	1081.83	33.03	1356.01	965.47	47.33	1086.08	32.68	1361.52	963.01
1732	49.53	1083.53	33.02	1357.52	965.29	47.33	1086.08	32.68	1361.52	963.01
1733	49.52	1086.91	33.01	1360.53	964.94	45.86	1106.59	32.68	1371.77	963.01
1734	49.51	1088.61	33	1362.04	964.76	45.86	1106.59	32.68	1371.77	963.01
1735	49.5	1090.3	33	1363.54	964.59	45.86	1105.13	32.68	1373.24	961.55
1736	49.49	1091.99	32.99	1365.05	964.41	47.33	1097.8	34.14	1371.77	965.94
1737	49.47	1095.37	32.98	1368.06	964.06	47.33	1097.8	34.14	1371.77	965.94
1738	49.46	1097.06	32.97	1369.56	963.88	47.33	1099.27	34.14	1373.24	963.01
1739	49.45	1098.75	32.97	1371.06	963.71	47.33	1097.8	34.14	1373.24	963.01
1740	49.44	1100.44	32.96	1372.57	963.53	47.33	1094.87	35.61	1371.77	958.62
1741	49.43	1103.81	32.95	1375.57	963.18	47.33	1093.41	35.61	1370.31	961.55
1742	49.42	1105.5	32.94	1377.07	963.01	47.33	1093.41	35.61	1370.31	961.55
1743	49.41	1107.19	32.94	1378.57	962.83	44.4	1106.59	35.61	1383.49	955.69
1744	49.4	1108.87	32.93	1380.07	962.66	44.4	1106.59	35.61	1383.49	955.69
1745	49.38	1112.24	32.92	1383.07	962.31	45.86	1112.45	35.61	1389.35	955.69
1746	49.37	1113.92	32.91	1384.57	962.13	45.86	1109.52	34.14	1387.89	955.69
1747	49.36	1115.61	32.91	1386.06	961.96	45.86	1109.52	34.14	1387.89	955.69
1748	49.35	1117.29	32.9	1387.56	961.78	45.86	1118.31	32.68	1387.89	964.48
1749	49.34	1120.65	32.89	1390.55	961.43	45.86	1121.24	34.14	1398.14	958.62
1750	49.33	1122.33	32.88	1392.05	961.26	45.86	1121.24	34.14	1398.14	958.62
1751	49.32	1124.01	32.88	1393.54	961.08	45.86	1121.24	34.14	1398.14	958.62
1752	49.31	1125.69	32.87	1395.04	960.91	45.86	1121.24	34.14	1398.14	958.62
1753	49.29	1129.05	32.86	1398.02	960.56	45.86	1125.64	34.14	1399.61	958.62
1754	49.28	1130.73	32.85	1399.52	960.39	45.86	1122.71	34.14	1396.68	957.15
1755	49.27	1132.4	32.85	1401.01	960.21	45.86	1132.96	34.14	1401.07	963.01
1756	49.26	1134.08	32.84	1402.5	960.04	45.86	1138.82	34.14	1404.01	964.48
1757	49.25	1137.43	32.83	1405.48	959.69	48.79	1144.68	29.75	1409.87	960.08
1758	49.24	1139.1	32.82	1406.97	959.52	48.79	1144.68	29.75	1409.87	960.08
1759	49.23	1140.78	32.82	1408.46	959.34	48.79	1144.68	29.75	1409.87	960.08
1760	49.22	1142.45	32.81	1409.95	959.17	48.79	1144.68	29.75	1409.87	960.08
1761	49.2	1145.8	32.8	1411.19	960.4	48.79	1143.22	31.21	1408.4	960.08
1762	49.19	1147.49	32.8	1410.95	961.8	48.79	1144.68	31.21	1408.4	960.08
1763	49.18	1149.17	32.79	1410.71	963.21	48.79	1144.68	29.75	1409.87	960.08
1764	49.18	1150.85	32.78	1410.47	964.61	48.79	1144.68	29.75	1409.87	960.08
1765	49.16	1154.21	32.77	1409.98	967.42	48.79	1144.68	29.75	1409.87	960.08
1766	49.15	1155.88	32.77	1409.74	968.82	48.79	1144.68	29.75	1409.87	960.08
1767	49.14	1157.56	32.76	1409.49	970.22	48.79	1144.68	29.75	1409.87	960.08
1768	49.13	1159.24	32.76	1409.25	971.62	48.79	1143.22	31.21	1408.4	960.08
1769	49.12	1162.59	32.74	1408.76	974.43	47.33	1165.19	34.14	1406.94	979.13
1770	49.11	1164.27	32.74	1408.52	975.83	47.33	1171.06	34.14	1408.4	982.06
1771	49.1	1165.94	32.73	1408.28	977.22	47.33	1171.06	32.68	1408.4	982.06
1772	49.09	1167.62	32.73	1408.04	978.62	47.33	1171.06	32.68	1408.4	982.06
1773	49.07	1170.96	32.72	1407.55	981.42	47.33	1171.06	32.68	1408.4	982.06
1774	49.07	1172.64	32.71	1407.31	982.82	47.33	1171.06	32.68	1408.4	982.06
1775	49.06	1174.31	32.71	1407.07	984.21	47.33	1172.52	34.14	1406.94	982.06
1776	49.05	1175.98	32.7	1406.83	985.61	45.86	1181.31	35.61	1409.87	995.24
1777	49.03	1179.32	32.69	1406.34	988.4	47.33	1185.71	34.14	1409.87	998.17
1778	49.02	1180.99	32.68	1406.1	989.8	47.33	1185.71	34.14	1409.87	996.71
1779	49.02	1182.66	32.68	1405.86	991.19	47.33	1185.71	34.14	1409.87	996.71
1780	49.01	1184.33	32.67	1405.62	992.59	48.79	1193.03	32.68	1411.33	1001.1
1781	48.99	1187.66	32.66	1405.14	995.37	48.79	1194.5	31.21	1412.8	1002.57
1782	48.98	1189.33	32.65	1404.89	996.77	48.79	1195.96	31.21	1412.8	1002.57
1783	48.97	1191	32.65	1404.65	998.16	47.33	1198.89	32.68	1404.01	1005.5
1784	48.97	1192.66	32.64	1404.41	999.55	47.33	1198.89	32.68	1404.01	1005.5
1785	48.95	1195.99	32.63	1403.93	1002.33	47.33	1201.82	34.14	1405.47	1004.03
1786	48.94	1197.66	32.63	1403.69	1003.72	47.33	1201.82	34.14	1405.47	1004.03
1787	48.93	1199.32	32.62	1403.45	1005.11	47.33	1197.43	34.14	1401.07	1001.1
1788	48.92	1200.98	32.62	1403.21	1006.5	48.79	1207.68	34.14	1404.01	1006.96
1789	48.91	1204.31	32.6	1402.73	1009.28	48.79	1206.22	32.68	1402.54	1014.29
1790	48.9	1205.97	32.6	1402.49	1010.67	48.79	1206.22	32.68	1402.54	1014.29
1791	48.89	1207.63	32.59	1402.25	1012.06	48.79	1206.22	32.68	1402.54	1014.29
1792	48.88	1209.29	32.59	1402.01	1013.44	48.79	1209.15	32.68	1401.07	1015.76
1793	48.86	1212.61	32.58	1401.52	1016.22	48.79	1212.08	34.14	1402.54	1017.22
1794	48.86	1214.26	32.57	1401.28	1017.6	48.79	1212.08	34.14	1402.54	1017.22
1795	48.85	1215.92	32.57	1401.04	1018.99	50.26	1215.01	34.14	1404.01	1020.15
1796	48.84	1217.58	32.56	1400.8	1020.37	48.79	1213.54	32.68	1402.54	1017.22
1797	48.82	1220.89	32.55	1400.33	1023.14	48.79	1213.54	32.68	1402.54	1017.22
1798	48.81	1222.55	32.54	1400.09	1024.52	48.79	1222.33	32.68	1404.01	1023.08
1799	48.81	1224.2	32.54	1399.85	1025.91	48.79	1220.87	32.68	1404.01	1021.62
1800	48.8	1225.86	32.53	1399.61	1027.29	48.79	1229.66	34.14	1402.54	1030.41
1801	48.78	1229.16	32.52	1399.13	1030.05	47.33	1236.98	35.61	1404.01	1034.8
1802	48.73	1229.82	32.49	1414	1030.59	47.33	1236.98	35.61	1404.01	1034.8
1803	48.72	1231.47	32.48	1413.76	1031.97	47.33	1229.66	32.68	1415.73	1033.34
1804	48.72	1233.12	32.48	1413.51	1033.35	47.33	1229.66	32.68	1415.73	1033.34
1805	48.7	1236.42	32.47	1413.03	1036.11	47.33	1229.66	32.68	1415.73	1033.34
1806	48.69	1238.07	32.46	1412.79	1037.49	47.33	1239.91	32.68	1415.73	1040.66
1807	48.68	1239.71	32.46	1412.55	1038.86	48.79	1238.45	32.68	1414.26	1040.66
1808	48.67	1241.36	32.45	1412.31	1040.24	48.79	1238.45	32.68	1414.26	1040.66
1809	48.66	1244.65	32.44	1411.83	1042.99	48.79	1248.71	31.21	1412.8	1047.99
1810	48.65	1246.3	32.43	1411.58	1044.37	48.79	1248.71	31.21	1412.8	1047.99
1811	48.64	1247.95	32.43	1411.34	1045.74	48.79	1248.71	31.21	1412.8	1047.99
1812	48.63	1249.59	32.42	1411.1	1047.12	48.79	1248.71	31.21	1412.8	1047.99
1813	48.62	1252.88	32.41	1410.62	1049.86	45.86	1260.43	31.21	1414.26	1058.24
1814	48.61	1254.52	32.41	1410.38	1051.24	45.86	1260.43	31.21	1414.26	1058.24
1815	48.6	1256.16	32.4	1410.14	1052.61	45.86	1260.43	31.21	1414.26	1058.24
1816	48.59	1257.81	32.39	1409.9	1053.98	47.33	1264.82	32.68	1411.33	1061.17
1817	48.58	1261.09	32.38	1409.42	1056.72	47.33	1269.22	32.68	1408.4	1065.57
1818	48.57	1262.73	32.38	1409.18	1058.09	47.33	1269.22	32.68	1408.4	1065.57
1819	48.56	1264.37	32.37	1408.94	1059.46	47.33	1269.22	32.68	1408.4	1065.57
1820	48.55	1266.01	32.37	1408.7	1060.83	47.33	1269.22	32.68	1408.4	1065.57
1821	48.53	1269.28	32.36	1408.22	1063.57	47.33	1266.29	32.68	1406.94	1064.1
1822	48.53	1270.92	32.35	1407.98	1064.94	47.33	1269.22	32.68	1408.4	1065.57
1823	48.52	1272.56	32.35	1407.74	1066.31	47.33	1269.22	32.68	1408.4	1065.57
1824	48.51	1274.19	32.34	1407.5	1067.67	47.33	1269.22	32.68	1408.4	1065.57
1825	48.49	1277.47	32.33	1407.03	1070.41	47.33	1269.22	32.68	1408.4	1065.57
1826	48.48	1279.1	32.32	1406.79	1071.77	47.33	1269.22	32.68	1408.4	1065.57
1827	48.48	1280.73	32.32	1406.55	1073.14	47.33	1269.22	32.68	1408.4	1065.57
1828	48.47	1282.37	32.31	1406.31	1074.5	47.33	1266.29	32.68	1406.94	1064.1
1829	48.45	1285.63	32.3	1405.83	1077.23	50.26	1282.4	35.61	1401.07	1072.89
1830	48.44	1287.26	32.3	1405.59	1078.6	50.26	1282.4	35.61	1401.07	1074.36
1831	48.44	1288.9	32.29	1405.35	1079.96	48.79	1285.33	34.14	1402.54	1080.22
1832	48.43	1290.53	32.28	1405.11	1081.32	48.79	1285.33	34.14	1402.54	1080.22
1833	48.41	1293.79	32.27	1404.64	1084.04	48.79	1285.33	34.14	1402.54	1080.22
1834	48.4	1295.42	32.27	1404.4	1085.41	48.79	1285.33	34.14	1402.54	1080.22
1835	48.39	1297.04	32.26	1404.16	1086.77	47.33	1288.26	35.61	1402.54	1083.15
1836	48.39	1298.67	32.26	1403.92	1088.13	45.86	1295.59	32.68	1406.94	1090.48
1837	48.37	1301.93	32.25	1403.45	1090.85	45.86	1297.05	34.14	1408.4	1090.48
1838	48.36	1303.55	32.24	1403.21	1092.21	45.86	1297.05	34.14	1408.4	1090.48
1839	48.35	1305.18	32.24	1402.97	1093.56	48.79	1297.05	31.21	1402.54	1090.48
1840	48.34	1306.8	32.23	1402.73	1094.92	48.79	1297.05	31.21	1402.54	1090.48
1841	48.33	1310.05	32.22	1402.26	1097.64	47.33	1302.91	34.14	1402.54	1094.87
1842	48.32	1311.68	32.21	1402.02	1098.99	47.33	1302.91	34.14	1402.54	1094.87
1843	48.31	1313.3	32.21	1401.78	1100.35	47.33	1321.96	32.68	1402.54	1109.52
1844	48.3	1314.92	32.2	1401.54	1101.7	48.79	1324.89	32.68	1401.07	1109.52
1845	48.29	1318.17	32.19	1401.07	1104.41	50.26	1330.75	35.61	1398.14	1113.92
1846	48.28	1319.79	32.19	1400.83	1105.77	50.26	1330.75	35.61	1398.14	1113.92
1847	48.27	1321.41	32.18	1400.6	1107.12	50.26	1330.75	35.61	1398.14	1113.92
1848	48.26	1323.03	32.18	1400.36	1108.48	47.33	1327.82	34.14	1401.07	1112.45
1849	48.25	1326.26	32.16	1399.89	1111.18	48.79	1332.22	34.14	1398.14	1115.38
1850	48.24	1327.88	32.16	1399.65	1112.53	48.79	1332.22	35.61	1398.14	1116.85
1851	48.23	1329.5	32.15	1399.41	1113.89	48.79	1330.75	34.14	1398.14	1115.38
1852	48.22	1331.12	32.15	1399.18	1115.24	48.79	1330.75	34.14	1398.14	1115.38
1853	48.21	1334.35	32.14	1398.7	1117.94	47.33	1330.75	34.14	1398.14	1115.38
1854	48.2	1335.97	32.13	1398.47	1119.29	47.33	1330.75	34.14	1398.14	1115.38
1855	48.19	1337.58	32.13	1398.23	1120.64	48.79	1336.61	35.61	1396.68	1118.31
1856	48.18	1339.19	32.12	1397.99	1121.99	48.79	1336.61	35.61	1396.68	1118.31
1857	48.17	1342.42	32.11	1397.52	1124.68	50.26	1348.33	35.61	1396.68	1127.1
1858	48.16	1344.03	32.1	1397.29	1126.03	50.26	1348.33	35.61	1396.68	1127.1
1859	48.15	1345.65	32.1	1397.05	1127.38	50.26	1352.73	35.61	1393.75	1130.03
1860	48.14	1347.26	32.09	1396.81	1128.72	50.26	1352.73	35.61	1393.75	1130.03
1861	48.12	1350.48	32.08	1396.34	1131.41	44.4	1358.59	35.61	1389.35	1137.36
1862	48.12	1352.09	32.08	1396.11	1132.76	44.4	1365.91	35.61	1387.89	1143.22
1863	48.11	1353.7	32.07	1395.87	1134.1	44.4	1365.91	35.61	1387.89	1143.22
1864	48.1	1355.31	32.07	1395.64	1135.45	47.33	1354.19	35.61	1396.68	1135.89
1865	48.08	1358.52	32.06	1395.17	1138.14	47.33	1354.19	35.61	1396.68	1135.89
1866	48.08	1360.13	32.05	1394.93	1139.48	47.33	1367.38	34.14	1395.21	1144.68
1867	48.07	1361.74	32.05	1394.7	1140.82	47.33	1367.38	35.61	1395.21	1146.15
1868	48.06	1363.34	32.04	1394.46	1142.16	47.33	1367.38	35.61	1393.75	1146.15
1869	48.04	1366.55	32.03	1393.99	1144.85	47.33	1373.24	38.54	1392.28	1147.61
1870	48.04	1368.16	32.02	1393.76	1146.19	45.86	1379.1	34.14	1393.75	1153.47
1871	48.03	1369.76	32.02	1393.52	1147.53	45.86	1379.1	34.14	1393.75	1153.47
1872	48.02	1371.37	32.01	1393.29	1148.87	45.86	1379.1	34.14	1393.75	1153.47
1873	48	1374.57	32	1392.82	1151.55	47.33	1377.63	34.14	1392.28	1152.01
1874	48	1376.17	32	1392.58	1152.88	47.33	1377.63	34.14	1392.28	1153.47
1875	47.99	1377.77	31.99	1392.35	1154.22	47.33	1377.63	34.14	1392.28	1153.47
1876	47.98	1379.38	31.99	1392.11	1155.56	50.26	1380.56	35.61	1392.28	1154.94
1877	47.96	1382.58	31.98	1391.65	1158.23	45.86	1389.35	34.14	1387.89	1163.73
1878	47.95	1384.17	31.97	1391.41	1159.57	45.86	1389.35	34.14	1387.89	1163.73
1879	47.95	1385.77	31.96	1391.18	1160.9	45.86	1389.35	34.14	1387.89	1163.73
1880	47.94	1387.37	31.96	1390.94	1162.24	45.86	1389.35	34.14	1387.89	1163.73
1881	47.92	1390.57	31.95	1390.48	1164.91	48.79	1393.75	35.61	1384.96	1163.73
1882	47.88	1391.05	47.88	1389.13	1165.31	48.79	1390.82	38.54	1387.89	1163.73
1883	47.87	1392.65	47.87	1388.9	1166.65	42.93	1408.4	45.86	1392.28	1179.85
1884	47.86	1394.24	47.86	1388.67	1167.98	42.93	1408.4	45.86	1392.28	1179.85
1885	47.84	1397.43	47.84	1388.2	1170.64	42.93	1408.4	45.86	1392.28	1179.85
1886	47.84	1399.02	47.84	1387.97	1171.97	42.93	1408.4	45.86	1392.28	1179.85
1887	47.83	1400.61	47.83	1387.74	1173.3	42.93	1408.4	45.86	1392.28	1179.85
1888	47.82	1402.2	47.82	1387.5	1174.63	44.4	1411.33	48.79	1390.82	1185.71
1889	47.8	1405.39	47.8	1387.04	1177.29	41.47	1415.73	48.79	1389.35	1190.1
1890	47.8	1406.98	47.8	1386.81	1178.62	44.4	1411.33	48.79	1390.82	1185.71
1891	47.79	1408.56	47.79	1386.57	1179.95	44.4	1411.33	48.79	1390.82	1185.71
1892	47.78	1410.15	47.78	1386.34	1181.27	44.4	1411.33	48.79	1390.82	1185.71
1893	47.76	1413.33	47.76	1385.88	1183.93	44.4	1411.33	48.79	1390.82	1185.71
1894	47.76	1414.92	47.76	1385.65	1185.25	44.4	1411.33	48.79	1390.82	1185.71
1895	47.75	1416.5	47.75	1385.41	1186.58	41.47	1415.73	48.79	1389.35	1190.1
1896	47.74	1418.09	47.74	1385.18	1187.91	41.47	1415.73	48.79	1389.35	1190.1
1897	47.72	1421.26	47.72	1384.72	1190.56	42.93	1423.05	45.86	1389.35	1191.57
1898	47.72	1422.85	47.72	1384.49	1191.88	35.61	1427.45	44.4	1389.35	1200.36
1899	47.71	1424.43	47.71	1384.26	1193.2	35.61	1427.45	44.4	1389.35	1200.36
1900	47.7	1426.01	47.7	1384.02	1194.53	35.61	1427.45	44.4	1389.35	1200.36
1901	47.68	1429.18	47.68	1383.56	1197.17	35.61	1430.38	45.86	1387.89	1203.29
1902	47.68	1430.76	47.68	1383.33	1198.49	50.26	1434.77	44.4	1380.56	1197.43
1903	47.67	1432.34	47.67	1383.1	1199.81	50.26	1434.77	44.4	1380.56	1197.43
1904	47.66	1433.92	47.66	1382.87	1201.14	47.33	1439.17	45.86	1379.1	1204.75
1905	47.64	1437.08	47.64	1382.41	1203.78	47.33	1439.17	45.86	1379.1	1204.75
1906	47.64	1438.66	47.64	1382.17	1205.1	45.86	1442.1	47.33	1380.56	1206.22
1907	47.63	1440.24	47.63	1381.94	1206.42	45.86	1442.1	47.33	1380.56	1206.22
1908	47.62	1441.82	47.62	1381.71	1207.73	45.86	1445.03	48.79	1380.56	1210.61
1909	47.6	1444.98	47.6	1381.25	1210.37	48.79	1450.89	45.86	1379.1	1210.61
1910	47.6	1446.55	47.6	1381.02	1211.69	47.33	1455.28	47.33	1377.63	1215.01
1911	47.59	1448.13	47.59	1380.79	1213.01	47.33	1453.82	47.33	1379.1	1213.54
1912	47.58	1449.71	47.58	1380.56	1214.32	47.33	1453.82	47.33	1379.1	1213.54
1913	47.56	1452.86	47.56	1380.1	1216.95	45.86	1461.14	50.26	1376.17	1222.33
1914	47.56	1454.43	47.56	1379.87	1218.27	45.86	1461.14	50.26	1376.17	1222.33
1915	47.55	1456	47.55	1379.64	1219.58	47.33	1455.28	48.79	1377.63	1217.94
1916	47.54	1457.58	47.54	1379.41	1220.9	47.33	1455.28	48.79	1377.63	1217.94
1917	47.53	1460.72	47.53	1378.95	1223.53	38.54	1469.93	50.26	1382.03	1234.05
1918	47.52	1462.29	47.52	1378.72	1224.84	38.54	1469.93	50.26	1382.03	1234.05
1919	47.51	1463.86	47.51	1378.49	1226.15	38.54	1469.93	50.26	1382.03	1234.05
1920	47.5	1465.43	47.5	1378.26	1227.46	41.47	1471.4	50.26	1380.56	1234.05
1921	1.91	2.29	19.95	2.12	19.95	18.59	32.23	24.65	27.68	30.72
1922	3.82	4.57	19.95	4.24	19.95	20.1	32.23	24.65	29.2	29.2
1923	5.73	6.85	19.94	6.36	19.94	21.62	32.23	24.65	27.68	29.2
1924	7.64	9.14	19.93	8.48	19.93	21.62	32.23	26.17	29.2	30.72
1925	11.45	13.7	19.92	12.71	19.92	26.17	39.81	23.14	33.75	33.75
1926	13.35	15.97	19.92	14.82	19.92	24.65	38.3	24.65	32.23	35.26
1927	15.25	18.25	19.91	16.93	19.91	26.17	41.33	24.65	36.78	36.78
1928	17.16	20.53	19.9	19.04	19.9	26.17	41.33	23.14	36.78	36.78
1929	20.95	25.07	19.89	23.26	19.89	30.72	51.94	21.62	48.91	36.78
1930	22.85	27.34	19.88	25.37	19.88	30.72	51.94	21.62	48.91	36.78
1931	24.75	29.61	19.88	27.47	19.88	30.72	51.94	21.62	48.91	36.78
1932	26.64	31.88	19.87	29.58	19.87	32.23	53.46	21.62	50.42	39.81
1933	30.43	36.41	19.86	33.78	19.86	32.23	53.46	23.14	48.91	39.81
1934	32.32	38.67	19.85	35.88	19.85	33.75	62.55	23.14	56.49	42.84
1935	34.21	40.93	19.85	37.98	19.85	33.75	62.55	23.14	56.49	41.33
1936	36.1	43.19	19.84	40.08	19.84	33.75	62.55	23.14	56.49	41.33
1937	39.88	47.71	19.83	44.27	19.83	41.33	68.62	21.62	64.07	41.33
1938	41.77	49.97	19.82	46.36	19.82	41.33	68.62	21.62	64.07	41.33
1939	43.65	52.22	19.82	48.45	19.82	41.33	68.62	21.62	64.07	41.33
1940	45.53	54.48	19.81	50.54	19.81	41.33	68.62	21.62	64.07	41.33
1941	49.3	58.98	19.8	54.72	19.8	41.33	71.65	21.62	67.1	42.84
1942	51.18	61.23	19.79	56.81	19.79	45.88	76.2	21.62	70.13	42.84
1943	53.06	63.48	19.79	58.89	19.79	59.52	91.36	21.62	83.78	44.36
1944	54.93	65.72	19.78	60.98	19.78	59.52	91.36	21.62	83.78	44.36
1945	58.68	70.21	19.77	65.14	19.77	59.52	91.36	21.62	83.78	44.36
1946	60.56	72.45	19.76	67.22	19.76	59.52	91.36	21.62	83.78	44.36
1947	62.43	74.69	19.75	69.3	19.75	59.52	91.36	21.62	83.78	44.36
1948	64.3	76.93	19.75	71.38	19.75	68.62	103.49	21.62	95.91	47.39
1949	68.04	81.41	19.74	75.53	19.74	67.1	100.45	21.62	94.39	45.88
1950	69.91	83.64	19.73	77.6	19.73	68.62	103.49	21.62	95.91	47.39
1951	71.78	85.88	19.72	79.67	19.72	68.62	103.49	21.62	95.91	47.39
1952	73.65	88.11	19.72	81.75	19.72	68.62	103.49	21.62	95.91	47.39
1953	77.37	92.57	19.7	85.88	19.7	68.62	103.49	21.62	95.91	47.39
1954	79.24	94.8	19.7	87.95	19.7	68.62	103.49	21.62	95.91	47.39
1955	81.1	97.03	19.69	90.02	19.69	80.75	112.58	23.14	103.49	38.3
1956	82.96	99.25	19.69	92.08	19.69	82.26	114.1	24.65	103.49	36.78
1957	86.67	103.7	19.67	96.21	19.67	88.33	118.65	23.14	111.07	36.78
1958	88.53	105.92	19.67	98.27	19.67	88.33	118.65	23.14	111.07	36.78
1959	90.39	108.14	19.66	100.33	19.66	88.33	118.65	23.14	111.07	36.78
1960	92.24	110.36	19.66	102.39	19.66	88.33	118.65	23.14	111.07	36.78
1961	95.95	114.79	19.64	106.5	19.64	91.36	124.71	23.14	114.1	35.26
1962	97.8	117	19.64	108.55	19.64	91.36	124.71	23.14	114.1	35.26
1963	99.65	119.22	19.63	110.61	19.63	89.84	123.2	23.14	115.62	36.78
1964	101.49	121.43	19.63	112.66	19.63	86.81	123.2	23.14	114.1	38.3
1965	105.19	125.85	19.61	116.76	19.61	95.91	129.26	23.14	123.2	35.26
1966	107.03	128.06	19.61	118.81	19.61	95.91	129.26	23.14	123.2	35.26
1967	108.88	130.26	19.6	120.85	19.6	95.91	129.26	23.14	123.2	35.26
1968	110.72	132.47	19.59	122.9	19.59	98.94	132.29	23.14	126.23	35.26
1969	114.4	136.87	19.58	126.99	19.58	115.62	152	18.59	139.87	33.75
1970	116.24	139.07	19.58	129.03	19.58	115.62	152	18.59	139.87	33.75
1971	118.08	141.27	19.57	131.07	19.57	115.62	152	18.59	139.87	33.75
1972	119.92	143.47	19.56	133.11	19.56	117.13	153.52	18.59	142.9	30.72
1973	123.59	147.86	19.55	137.18	19.55	117.13	153.52	18.59	142.9	32.23
1974	125.42	150.06	19.55	139.22	19.55	124.71	159.58	18.59	150.48	30.72
1975	127.25	152.25	19.54	141.25	19.54	132.29	164.13	18.59	155.03	27.68
1976	129.09	154.44	19.53	143.29	19.53	132.29	164.13	18.59	155.03	27.68
1977	132.75	158.82	19.52	147.35	19.52	132.29	170.19	18.59	159.58	30.72
1978	134.57	161	19.52	149.38	19.52	129.26	171.71	18.59	161.1	32.23
1979	136.4	163.19	19.51	151.41	19.51	129.26	171.71	18.59	159.58	32.23
1980	138.23	165.37	19.5	153.43	19.5	129.26	171.71	18.59	159.58	32.23
1981	141.87	169.74	19.49	157.48	19.49	138.36	167.16	18.59	161.1	29.2
1982	143.7	171.92	19.49	159.5	19.49	138.36	167.16	18.59	161.1	29.2
1983	145.52	174.1	19.48	161.53	19.48	144.42	183.84	21.62	168.68	30.72
1984	147.34	176.28	19.47	163.55	19.47	144.42	183.84	21.62	168.68	30.72
1985	150.98	180.63	19.46	167.58	19.46	144.42	183.84	21.62	168.68	30.72
1986	152.79	182.8	19.46	169.6	19.46	144.42	183.84	21.62	168.68	30.72
1987	154.61	184.97	19.45	171.62	19.45	147.45	186.87	21.62	171.71	29.2
1988	156.42	187.14	19.44	173.63	19.44	147.45	186.87	21.62	171.71	29.2
1989	160.05	191.48	19.43	177.65	19.43	161.1	202.03	23.14	185.35	29.2
1990	161.86	193.65	19.43	179.66	19.43	161.1	202.03	23.14	185.35	29.2
1991	163.67	195.82	19.42	181.67	19.42	161.1	202.03	23.14	185.35	29.2
1992	165.48	197.98	19.41	183.68	19.41	161.1	202.03	23.14	185.35	29.2
1993	169.09	202.3	19.4	187.69	19.4	161.1	202.03	23.14	185.35	29.2
1994	170.9	204.46	19.4	189.7	19.4	161.1	202.03	23.14	185.35	29.2
[truncated: 1,607 more rows]

## Sheet: Table S6
		Table S6 Actual and predicted concentration data
								System III: 5-dimensional amino acid samples (bulk solution: human urine)
Entry	Configuration concentration(mg/L)
	Actual values					Predicted values
	[Pro]	[Gly]	[His]	[Thr]	[L-Phe]	[Pro]	[Gly]	[His]	[Thr]	[L-Phe]
	Training set
1	0	0	0	194.92	194.92	-7.85	-4.12	-9.33	207.29	190.36
2	2.89	2.89	2.89	194.92	194.92	4.35	8.42	-5.65	216.67	203.79
3	4.33	5.78	5.78	194.92	194.92	3.76	-1.85	-7.29	203.47	201.8
4	7.22	7.22	7.22	194.92	194.92	7.36	1.87	-1.54	202.55	196.62
5	11.55	12.99	12.99	194.92	194.92	7.8	17.78	1	206.67	202.63
6	14.44	15.88	15.88	194.92	194.92	11.47	19.7	10.23	219.39	202.15
7	17.33	18.77	17.33	194.92	194.92	22.75	27.68	24.26	213.74	204.38
8	18.77	20.21	20.21	194.92	194.92	18.92	15.81	9.52	207.63	204.81
9	24.55	25.99	25.99	194.92	194.92	16.82	26.46	23.16	209.08	196.34
10	27.43	28.88	28.88	194.92	194.92	30.98	37.72	33.67	216.51	198.66
11	28.88	30.32	30.32	194.92	194.92	33.17	39.24	30.6	205.78	203.97
12	31.76	33.21	33.21	193.48	193.48	34.85	38.22	39.68	208.51	200.57
13	36.1	38.98	38.98	193.48	193.48	25.07	33.11	33.38	210.91	196.35
14	38.98	40.43	40.43	193.48	193.48	47.66	45.85	47.95	208.02	193.41
15	41.87	43.32	43.32	193.48	193.48	56.18	57.04	58.17	203.42	198.02
16	43.32	46.2	46.2	193.48	193.48	49.26	45.73	42.69	201.07	201.76
17	49.09	50.53	50.53	193.48	193.48	57.5	57.53	53.73	207.35	201.5
18	50.53	53.42	53.42	193.48	193.48	46.45	45.71	38.86	201.93	196.24
19	53.42	56.31	56.31	193.48	193.48	55.98	58.26	52.42	199.35	199.78
20	56.31	59.2	59.2	193.48	193.48	56.6	61.78	58.06	209.6	193.98
21	60.64	63.53	63.53	193.48	193.48	57.37	63.77	66.66	206.96	195.85
22	62.09	66.42	66.42	193.48	193.48	71.32	75.04	69.47	201.23	204.4
23	64.97	69.31	69.31	193.48	193.48	72.4	81.43	78.72	207.87	190.7
24	67.86	70.75	70.75	193.48	193.48	69.7	73.53	70.08	207.19	196.07
25	72.19	76.52	76.52	193.48	193.48	80.46	84.51	79.61	210.35	193.42
26	75.08	79.41	77.97	193.48	193.48	84.04	86.29	87.42	212.57	191.3
27	76.52	80.86	80.86	193.48	193.48	83.29	88.36	86.22	206.37	198.74
28	79.41	83.74	83.74	192.03	192.03	75.61	80.8	85.56	203.32	191.05
29	83.74	89.52	88.08	192.03	192.03	75.85	72.31	73.23	191.4	187.91
30	86.63	90.96	90.96	192.03	192.03	81.99	89.86	93.85	207.21	190.25
31	89.52	93.85	93.85	192.03	192.03	93.89	93.67	92.63	194.99	192.47
32	90.96	96.74	96.74	192.03	192.03	98.04	102.05	105.99	204.98	190.02
33	96.74	101.07	101.07	192.03	192.03	103.8	108.05	110.91	208.72	189.71
34	98.18	103.96	103.96	192.03	192.03	100.46	108.67	109.69	210.64	196.8
35	101.07	106.85	106.85	192.03	192.03	93.14	101.22	96.81	204.67	196.12
36	102.51	108.29	108.29	192.03	192.03	115.47	111.75	114.55	206.43	192.51
37	108.29	114.06	114.06	192.03	192.03	128.07	127.27	128.4	213.82	188.67
38	109.73	116.95	115.51	192.03	192.03	111.06	111.56	112.65	201.62	197.92
39	112.62	118.4	118.4	192.03	192.03	117.2	121.52	123.3	202.24	189.09
40	115.51	121.28	121.28	192.03	192.03	127.38	130.45	130.28	203.97	191.8
41	119.84	127.06	125.62	192.03	192.03	129.71	131.79	126.58	194.98	196.31
42	122.73	128.5	128.5	192.03	192.03	138.05	140.88	135.22	190.78	193.19
43	124.17	131.39	131.39	192.03	192.03	126.83	130.45	124.71	201.29	194.84
44	127.06	134.28	132.83	190.59	190.59	135.31	138.18	132.57	200.58	194.82
45	131.39	138.61	138.61	190.59	190.59	134.07	137.4	137.95	199.1	190.81
46	134.28	141.5	140.05	190.59	190.59	152.48	148.81	149.24	193.13	189.71
47	135.72	144.39	142.94	190.59	190.59	147.01	147.61	147.58	200.1	190.72
48	138.61	145.83	145.83	190.59	190.59	143.21	150.15	152.74	199.22	187.99
49	142.94	151.6	150.16	190.59	190.59	150.64	153.15	148	194.33	188.97
50	145.83	153.05	153.05	190.59	190.59	158.74	165.68	161.86	201.85	189.97
51	147.27	155.94	155.94	190.59	190.59	153.3	161.13	156.2	213.04	190.53
52	150.16	158.82	157.38	190.59	190.59	148.94	156.71	151.77	199.23	187.03
53	154.49	163.16	163.16	190.59	190.59	155.4	162	165.5	201.81	180.73
54	157.38	166.04	164.6	190.59	190.59	164.27	170.84	172.25	204.19	184.54
55	158.82	168.93	167.49	190.59	190.59	161.59	166.41	168.71	195.12	182.89
56	161.71	170.38	170.38	190.59	190.59	167.77	168.19	169.99	197.55	187.38
57	166.04	176.15	174.71	190.59	190.59	162.53	171.63	176.67	193.8	180.16
58	168.93	177.59	177.59	190.59	190.59	166.73	175.19	174.26	206.67	180.43
59	170.38	180.48	180.48	190.59	190.59	166.23	180.59	178.64	193.75	187.23
60	173.26	183.37	181.93	189.15	189.15	167.35	179.13	173.85	208.92	187.1
61	176.15	186.26	184.81	378.29	187.7	176.03	206.55	189.82	387	182.12
62	179.04	187.7	187.7	378.29	187.7	178.78	202.65	193.18	392.57	180.79
63	180.48	190.59	190.59	378.29	187.7	181.96	194.13	196.03	385.09	181.06
64	183.37	193.48	192.03	378.29	187.7	192.17	209.4	205.41	375.65	188.91
65	187.7	197.81	197.81	376.85	187.7	189.02	205.83	202.26	387.09	184.36
66	190.59	200.7	199.25	376.85	187.7	190.72	216.71	203.08	387.35	189.13
67	192.03	202.14	202.14	376.85	187.7	186.34	207.67	202.5	389.04	186.76
68	194.92	205.03	205.03	376.85	187.7	199.89	208.16	206.62	387.42	190.75
69	199.25	209.36	209.36	376.85	187.7	198.37	221.07	216.96	386.99	185.72
70	200.7	212.25	212.25	376.85	187.7	202.8	218.47	217.32	377.21	190.31
71	203.58	215.13	213.69	376.85	187.7	202.23	217.44	217.55	379.61	191.92
72	206.47	216.58	216.58	376.85	187.7	212.12	218.24	223.86	379.03	190.2
73	210.8	222.35	220.91	376.85	186.26	222.96	227.54	240.77	378.56	179.25
74	212.25	223.8	223.8	375.4	186.26	204.51	230.43	219.77	383.01	177.44
75	215.13	226.69	225.24	375.4	186.26	223.87	232.93	237.17	373.68	181.17
76	216.58	229.57	228.13	375.4	186.26	223.62	226.16	234.63	381.79	189.93
77	220.91	233.9	232.46	375.4	186.26	227.31	239.08	241.36	379.34	189.35
78	223.8	236.79	235.35	375.4	186.26	226.41	237.99	235	380.67	186.58
79	226.69	238.24	238.24	375.4	186.26	239.53	246.07	250.35	383.34	182.22
80	228.13	241.12	239.68	375.4	186.26	223.79	243.17	236.74	382.7	181.42
81	232.46	244.01	245.46	375.4	186.26	239.98	244.28	242.61	383.57	184.94
82	235.35	242.57	246.9	375.4	186.26	239.32	241.44	245.92	382.13	184.88
83	236.79	242.57	249.79	373.96	186.26	240.32	236.3	246.18	369.98	179.24
84	239.68	242.57	252.67	373.96	186.26	235.61	234.75	245.59	381.32	181.63
85	244.01	242.57	257.01	373.96	186.26	252.81	240.51	272.7	377.4	182.97
86	246.9	242.57	259.89	373.96	186.26	244.42	242.79	261.82	384.07	177.21
87	248.34	242.57	261.34	373.96	186.26	255.63	244.11	274.03	384.64	176.64
88	251.23	242.57	264.23	373.96	186.26	248.15	239.81	266.24	385.43	170.98
89	255.56	242.57	268.56	373.96	186.26	259.3	240.54	272.82	379.4	185.32
90	258.45	242.57	271.44	373.96	186.26	253.13	243.19	264.61	379.32	174.32
91	259.89	242.57	272.89	373.96	186.26	247.98	241.01	263.14	379.57	183.81
92	262.78	242.57	275.78	373.96	186.26	262.76	244.04	279.54	389.45	179.81
93	267.11	242.57	280.11	373.96	184.81	262.66	238.08	279.16	377.03	185.1
94	268.56	242.57	283	373.96	184.81	270.95	237.94	294.29	383.05	184.44
95	271.44	242.57	285.88	373.96	184.81	262.93	237.42	278.71	377.69	183.39
96	272.89	242.57	287.33	372.51	184.81	266.37	236.96	273.65	376.69	182.39
97	278.66	242.57	293.1	372.51	184.81	263.87	242.03	287.48	379.85	167.44
98	280.11	242.57	294.55	372.51	184.81	280.11	238.98	298.55	376.26	174.94
99	283	242.57	297.43	372.51	184.81	257.73	241.25	283.81	378.06	171.96
100	284.44	242.57	298.88	372.51	184.81	274.94	240.19	294.6	381.19	176.25
101	288.77	242.57	304.65	372.51	184.81	280.01	236.47	301.76	375.5	178.2
102	291.66	241.12	306.1	372.51	184.81	276.49	232.46	296.64	373.72	172.86
103	294.55	241.12	308.99	372.51	184.81	282.11	236.96	301.24	369.51	165.23
104	295.99	241.12	311.87	372.51	184.81	276.66	241.53	292.81	376.8	167
105	300.32	241.12	316.2	372.51	184.81	287.83	231.37	309.36	373.81	169.49
106	303.21	241.12	319.09	372.51	184.81	297.77	236.97	316.1	378.78	176.26
107	304.65	241.12	320.54	372.51	184.81	293.48	238.37	312.83	381.86	167.82
108	307.54	241.12	323.42	372.51	184.81	289.86	240.28	302.04	377.3	174.16
109	311.87	241.12	327.76	371.07	184.81	296.33	245.01	314.75	387.99	174.07
110	313.32	241.12	330.64	371.07	184.81	288.83	241.95	303.99	381.76	175.32
111	316.2	241.12	332.09	371.07	184.81	313.56	242.28	322.68	378.51	186.39
112	319.09	241.12	334.97	371.07	184.81	298.94	235.22	315.03	378.94	176.79
113	323.42	241.12	339.31	371.07	184.81	315.3	233.92	335.07	374.68	181.39
114	324.87	241.12	342.19	371.07	184.81	319.99	233.59	342.82	378.66	173.11
115	327.76	241.12	343.64	371.07	184.81	310.46	236.52	330.63	374.83	169.3
116	329.2	241.12	346.53	371.07	184.81	311.11	235.3	328.32	375.62	169.75
117	333.53	241.12	350.86	371.07	184.81	317.44	233.26	334.37	379.42	172.28
118	336.42	241.12	353.74	371.07	184.81	313.31	229.35	340.19	378.12	170.37
119	337.86	241.12	356.63	371.07	184.81	316.51	229.26	333.23	379.19	176.95
120	340.75	241.12	358.08	371.07	183.37	333.37	236.24	352.52	370.65	194.76
121	342.19	238.24	359.52	366.74	366.74	316.15	235.7	339.53	362.65	327.13
122	343.64	238.24	362.41	366.74	366.74	344.46	244.79	367.52	356.9	343.8
123	346.53	238.24	363.85	366.74	366.74	348.06	234.81	370.62	365.05	348.75
124	347.97	238.24	366.74	366.74	366.74	347.27	233.71	374.05	361.31	358.37
125	353.74	238.24	371.07	366.74	366.74	350.43	233.52	370.48	363.82	355.81
126	355.19	238.24	373.96	366.74	366.74	361.76	232.98	374.84	360.29	365.58
127	358.08	238.24	375.4	366.74	366.74	350.6	224.97	374.37	362.84	356.22
128	359.52	238.24	378.29	366.74	366.74	359.17	232.49	384.73	371.61	358.16
129	363.85	238.24	382.62	366.74	366.74	347.35	233.96	369.56	362.58	341.33
130	366.74	238.24	385.51	366.74	366.74	349.63	234.52	376.09	366.37	345.22
131	368.18	238.24	386.95	365.3	365.3	339.26	235	376.33	359.77	342.18
132	371.07	236.79	389.84	365.3	365.3	367.06	237.19	388.11	364.86	347.87
133	375.4	236.79	394.17	365.3	365.3	362.74	236.92	380.06	367.62	352.59
134	376.85	236.79	397.06	365.3	365.3	359.65	233.1	388.02	360.47	350.13
135	379.73	236.79	398.5	365.3	365.3	366.77	229.68	386.42	357.8	351.45
136	381.18	236.79	401.39	365.3	365.3	362.14	235.57	379.54	358.71	341.99
137	385.51	236.79	405.72	365.3	365.3	370.5	235.22	394.42	360.29	347.56
138	388.4	236.79	408.61	365.3	365.3	369.69	232.59	388.04	361.48	337.56
139	389.84	236.79	410.06	365.3	365.3	376.28	228.58	400.37	364.05	343.32
140	392.73	236.79	412.94	365.3	365.3	387.96	228.5	397.2	361.76	349.55
141	397.06	236.79	417.27	365.3	365.3	370.16	236.63	407.14	353.91	343.84
142	398.5	236.79	420.16	365.3	365.3	371.22	229.94	407.42	356.39	344.07
143	401.39	236.79	421.61	365.3	365.3	396.46	230.26	417.61	362.41	365.93
144	402.84	236.79	424.49	365.3	365.3	396.95	234.49	424.93	363.97	362.01
145	407.17	236.79	428.83	363.85	363.85	407.58	229.68	432.88	362.51	357.14
146	410.06	236.79	430.27	363.85	363.85	401.84	232.8	430.11	355.7	361.73
147	411.5	236.79	433.16	363.85	363.85	401.6	232.4	429.67	355.01	360.76
148	414.39	236.79	436.04	363.85	363.85	387.3	228.93	424.94	357.65	353.73
149	418.72	236.79	440.38	363.85	363.85	412.32	232.89	443.47	363.43	356.25
150	420.16	236.79	441.82	363.85	363.85	414.93	229.22	447.6	354.16	362.55
151	423.05	236.79	444.71	363.85	363.85	423.26	232.15	452.76	358.06	359.47
152	424.49	236.79	446.15	363.85	363.85	427.94	237.12	445.91	354.44	357.3
153	428.83	235.35	451.93	363.85	363.85	405.49	224.03	436.85	360.86	356.45
154	431.71	235.35	453.37	363.85	363.85	402.16	233.18	444.12	351.17	359.47
155	433.16	235.35	456.26	363.85	363.85	400.98	233.43	442.87	352.19	358.65
156	436.04	235.35	457.7	363.85	363.85	413.65	233.51	446.03	358.49	353.27
157	440.38	235.35	462.03	363.85	363.85	414.03	236.6	442.37	359.71	356.03
158	441.82	235.35	464.92	362.41	362.41	427.08	235.1	458.95	350.5	361.27
159	444.71	235.35	467.81	362.41	362.41	425.64	230.68	458.16	353.73	351.22
160	446.15	235.35	469.25	362.41	362.41	437.16	232.53	464.28	356.92	359.38
161	450.48	238.24	472.14	362.41	362.41	432.7	242.24	463.71	357.45	365.85
162	453.37	239.68	472.14	362.41	362.41	438.66	232.71	468.55	352.45	360.29
163	454.81	242.57	472.14	362.41	362.41	440.68	234.03	472.45	353.52	364.03
164	457.7	245.46	470.7	362.41	362.41	431.11	234.7	464.79	349.13	354.57
165	462.03	249.79	470.7	362.41	362.41	440.42	245.08	465.26	351.55	359.99
166	463.48	251.23	470.7	362.41	362.41	443.36	241.61	474.78	349.65	352.12
167	466.37	254.12	470.7	362.41	362.41	452.14	246.4	471.41	354.81	356.41
168	467.81	257.01	470.7	362.41	362.41	451.68	247.53	470.46	350.84	357
169	472.14	261.34	470.7	362.41	362.41	458.44	257.27	468.16	354.23	367.38
170	475.03	262.78	470.7	362.41	362.41	469.61	264.04	477.38	356.56	364.59
171	476.47	265.67	470.7	362.41	362.41	467.07	258.86	474.57	364.54	351.95
172	479.36	268.56	470.7	360.96	360.96	442.26	253.97	463.63	345.6	358.17
173	483.69	272.89	470.7	360.96	360.96	450.38	254.32	470.34	355.26	358.18
174	485.14	274.33	469.25	360.96	360.96	473.03	261.04	467.38	351.55	348.95
175	486.58	277.22	469.25	360.96	360.96	472.77	261.28	467.58	348.01	348.63
176	489.47	280.11	469.25	360.96	360.96	465.72	261.19	466.09	345.43	356.48
177	493.8	284.44	469.25	360.96	360.96	466.18	268.97	466.54	356.94	360.19
178	495.24	285.88	469.25	360.96	360.96	478.22	270.09	474.63	348.77	355.51
179	498.13	288.77	469.25	360.96	360.96	480.76	276.27	472	347.71	353.44
180	499.57	291.66	469.25	360.96	360.96	482.31	276.58	467.8	361.76	362.42
181	499.57	293.1	464.92	537.11	358.08	498.57	307.83	470.69	538.06	351.26
182	502.46	294.55	464.92	537.11	356.63	499.09	291.35	463.08	518.47	358.33
183	503.91	297.43	464.92	537.11	356.63	494.26	291.62	466.5	522.76	353.17
184	506.79	300.32	464.92	537.11	356.63	494.94	305.41	469.7	526.22	353.66
185	509.68	304.65	464.92	537.11	356.63	500.37	300.56	463.27	519.5	351.51
186	512.57	306.1	463.48	537.11	356.63	517	317.89	464.4	535.94	356.89
187	514.01	308.99	463.48	537.11	356.63	504.52	301.41	467.31	529.33	354.39
188	516.9	310.43	463.48	535.67	356.63	509.23	305.47	467.22	526.67	359.98
189	521.23	316.2	463.48	535.67	356.63	514.3	317.13	470.43	536.72	357.51
190	522.68	317.65	463.48	535.67	356.63	520.23	322.31	464.07	525.24	361.79
191	525.56	320.54	463.48	535.67	356.63	520.75	322.28	463.55	530.71	363.43
192	527.01	321.98	463.48	535.67	356.63	517.35	317.85	464.62	530.21	356.74
193	531.34	326.31	463.48	535.67	356.63	525.19	316.78	464.13	536.63	354.8
194	532.78	329.2	463.48	535.67	356.63	515.18	310.94	457.43	527.15	346.64
195	535.67	332.09	463.48	535.67	356.63	506.46	307.32	466.32	517.82	349.74
196	537.11	333.53	463.48	535.67	356.63	518.58	313.87	455.7	516.21	349.39
197	541.45	337.86	462.03	534.23	355.19	536.1	334.91	455.46	522.66	354.09
198	544.33	340.75	462.03	534.23	355.19	534.62	335.72	456.58	534.07	353.69
199	545.78	342.19	462.03	534.23	355.19	537.24	331.08	464.33	526.58	353.92
200	548.67	345.08	462.03	534.23	355.19	545.63	340.42	468.1	536.13	355.56
201	551.55	349.41	462.03	534.23	355.19	541.82	350.44	461	530.73	349.03
202	554.44	352.3	462.03	534.23	355.19	546.78	344.12	464.64	521.35	352.53
203	555.88	353.74	462.03	534.23	355.19	532.66	330.35	463.42	525.71	346.7
204	558.77	356.63	462.03	534.23	355.19	538.59	332.63	452.42	524.66	346.9
205	563.1	360.96	462.03	534.23	355.19	540.88	342.91	461.03	520.6	354.22
206	564.55	362.41	462.03	534.23	355.19	553.86	350.25	458.61	523.57	352.26
207	567.44	365.3	462.03	532.78	355.19	540.95	340.13	465.85	512.21	351.15
208	568.88	368.18	460.59	532.78	355.19	562.33	353.77	466.23	521.92	357.4
209	573.21	372.51	460.59	532.78	355.19	561.63	354.56	454.76	516.89	356.19
210	574.65	373.96	460.59	532.78	355.19	554.28	355.06	451.55	526.15	346.17
211	577.54	376.85	460.59	532.78	353.74	564.73	367.06	458.99	526.76	350.77
212	578.99	378.29	460.59	532.78	353.74	549.89	349.88	444.46	524.73	348.35
213	583.32	382.62	460.59	532.78	353.74	577.6	380.8	453.69	527.46	369.88
214	584.76	385.51	460.59	532.78	353.74	571.71	376.89	463.89	536.75	359.21
215	587.65	386.95	460.59	532.78	353.74	569.77	377.6	454.88	532.96	355.84
216	589.09	389.84	460.59	532.78	353.74	572.38	381.13	459.23	528.2	352.08
217	593.42	394.17	460.59	531.34	353.74	571.4	369.03	457.11	528.94	350.78
218	596.31	397.06	460.59	531.34	353.74	586	390.86	458.94	535.84	360.65
219	597.76	398.5	459.15	531.34	353.74	578.56	377.94	452.35	527.32	354.21
220	599.2	401.39	459.15	531.34	353.74	582.4	385.35	453.52	534.71	351.33
221	603.53	405.72	459.15	531.34	353.74	578.79	381.27	460.94	534.33	345.94
222	606.42	407.17	459.15	531.34	353.74	588.57	389.69	457.36	530.3	361.27
223	607.86	410.06	459.15	531.34	353.74	585.34	391.05	456.76	527.04	344.65
224	610.75	411.5	459.15	531.34	353.74	579.06	388.66	458.33	523.85	350.4
225	613.64	417.27	459.15	531.34	352.3	587.07	395.26	465.23	540.17	343.55
226	616.53	418.72	459.15	529.9	352.3	592.53	406.15	459.81	535.68	351.28
227	617.97	421.61	459.15	529.9	352.3	594.46	405.22	457.48	536.02	359.04
228	620.86	423.05	459.15	529.9	352.3	590.95	407.27	455.74	521.09	355.64
229	625.19	427.38	459.15	529.9	352.3	609.77	425.49	450.51	537.96	356.57
230	626.63	430.27	457.7	529.9	352.3	611.66	430.04	452.85	542.47	358.6
231	628.08	431.71	457.7	529.9	352.3	605.55	413.41	445.75	540.24	361.86
232	630.97	434.6	457.7	529.9	352.3	607.12	414.38	446.87	527.48	359.19
233	635.3	438.93	457.7	529.9	352.3	605.82	410.14	462.54	531.8	352.29
234	636.74	440.38	457.7	529.9	352.3	617.11	428.36	460.03	540.31	348.56
235	639.63	443.26	457.7	529.9	352.3	612.02	421.39	460.55	529.68	363.45
236	641.07	444.71	457.7	528.45	352.3	611.44	423.3	455.1	532.99	362.89
237	645.4	450.48	457.7	528.45	352.3	642.5	461.38	465.02	533.39	383.97
238	646.85	451.93	457.7	528.45	352.3	639.1	457.02	453.54	525.4	377.35
239	649.74	454.81	457.7	528.45	352.3	631.32	461.43	455.99	526.38	365.06
240	651.18	456.26	457.7	528.45	350.86	646.26	457.98	455.38	525.54	403.72
241	646.85	456.26	454.81	524.12	524.12	642.31	457.49	444.01	515.53	518.95
242	646.85	459.15	457.7	524.12	524.12	639.41	437.69	431.95	520.65	517.6
243	646.85	460.59	459.15	524.12	524.12	636.85	457	458.73	526.31	523.68
244	646.85	463.48	462.03	522.68	522.68	634.28	462.22	459.68	525.82	523.29
245	646.85	467.81	466.37	522.68	522.68	638.32	477.06	467.45	522.18	522.69
246	646.85	469.25	467.81	522.68	522.68	644.21	463.75	453.25	515.79	511.41
247	646.85	472.14	470.7	522.68	522.68	629.07	462.87	464.03	524.04	513.36
248	646.85	473.58	472.14	522.68	522.68	642.38	476.07	469.34	522.26	521.11
249	645.4	477.92	476.47	522.68	522.68	636.31	480.83	480.42	527.71	525.09
250	645.4	480.8	479.36	522.68	522.68	635.93	480.22	481.01	528.3	523.7
251	645.4	482.25	480.8	522.68	522.68	641.44	486.86	482.95	520.57	519.81
252	645.4	485.14	483.69	522.68	522.68	632.43	472.86	476.3	522.39	504.05
253	645.4	489.47	488.02	521.23	521.23	637.28	497.08	490.58	519.41	518.81
254	645.4	490.91	489.47	521.23	521.23	639.34	494.12	481.02	523.46	512.4
255	645.4	493.8	492.35	521.23	521.23	631.65	509.88	506.29	522.66	524.33
256	645.4	495.24	493.8	521.23	521.23	636.64	490.97	486.82	519.28	520.09
257	643.96	499.57	498.13	521.23	521.23	641.16	520.25	519.59	526.41	527.12
258	643.96	502.46	501.02	521.23	521.23	640.28	516.33	516.57	525.68	525.63
259	643.96	503.91	502.46	521.23	521.23	643.94	512.59	498.9	520.6	519.87
260	643.96	506.79	505.35	521.23	521.23	637.02	507.41	503.55	525.83	515.45
261	643.96	511.13	509.68	521.23	521.23	640.37	519.84	512.23	523.47	518.98
262	643.96	512.57	511.13	521.23	521.23	641.29	518.19	515.36	528.49	514.63
263	643.96	515.46	514.01	519.79	519.79	640.49	516.81	513.09	525.35	520.1
264	643.96	516.9	515.46	519.79	519.79	636.36	520.01	517.09	526.43	517.29
265	642.52	521.23	519.79	519.79	519.79	635.91	519.25	513.64	509.45	510.08
266	642.52	524.12	522.68	519.79	519.79	632.56	540.58	532.33	520.39	517.55
267	642.52	525.56	524.12	519.79	519.79	631.03	536.34	529.15	518.39	518.62
268	642.52	528.45	527.01	519.79	519.79	625.83	530.91	530.9	518.86	514.67
269	642.52	532.78	531.34	519.79	519.79	636.3	550.91	532.79	524.63	513.37
270	642.52	534.23	532.78	519.79	519.79	637.61	548.96	533.04	529.51	512.12
271	642.52	537.11	535.67	519.79	519.79	637.67	545.4	542.33	528	513.77
272	642.52	538.56	537.11	519.79	519.79	639.99	548.67	545.23	525.02	518.25
273	641.07	542.89	541.45	518.34	518.34	637.72	560.2	545.84	529.06	516.42
274	641.07	545.78	542.89	518.34	518.34	637.43	567.26	557.05	532.05	515.03
275	641.07	547.22	545.78	518.34	518.34	639.07	550.88	540.31	521.35	518.82
276	641.07	550.11	547.22	518.34	518.34	638.35	556.75	541.79	526.85	517.83
277	641.07	554.44	551.55	518.34	518.34	633.8	559.54	557.82	528.18	516.45
278	641.07	555.88	554.44	518.34	518.34	635.64	557.74	550.32	529.58	521.23
279	641.07	558.77	555.88	518.34	518.34	641.37	556.24	543.72	523.86	518.03
280	641.07	560.22	558.77	518.34	518.34	631.23	561.85	559.02	526.4	519.15
281	639.63	564.55	563.1	518.34	518.34	628.33	572.91	570.02	527.88	524.05
282	639.63	567.44	564.55	518.34	518.34	627.67	563.34	566.53	521.87	521.27
283	639.63	568.88	567.44	516.9	516.9	632.01	577.27	581.57	523.23	522.99
284	639.63	570.32	568.88	516.9	516.9	633.83	559.89	579.02	524.96	514.63
285	639.63	574.65	573.21	516.9	516.9	635.27	567.76	562.25	517.93	515.69
286	639.63	577.54	576.1	516.9	516.9	626.58	573.3	572.55	516.78	510.9
287	639.63	578.99	577.54	516.9	516.9	630.54	582.93	579.12	515.67	518.32
288	639.63	581.87	578.99	516.9	516.9	630.57	564.13	564.4	516.14	511.96
289	638.18	586.21	583.32	516.9	516.9	627	599.58	594.89	525.51	515.44
290	638.18	587.65	586.21	516.9	516.9	633.8	587.92	587.07	528.45	519.34
291	638.18	590.54	587.65	516.9	516.9	631.43	594.24	590.85	528.46	514.36
292	638.18	591.98	590.54	516.9	516.9	631.23	594.67	596.6	521.79	520.45
293	638.18	596.31	594.87	515.46	515.46	628.63	581.39	595.86	516.08	510.17
294	638.18	599.2	596.31	515.46	515.46	627.92	606.21	604.88	509.34	506.74
295	638.18	600.64	599.2	515.46	515.46	634.36	613.54	606.55	528.77	513.47
296	638.18	603.53	600.64	515.46	515.46	631.86	605.35	599.51	516.35	515.42
297	636.74	606.42	604.98	515.46	515.46	635.71	611.38	602.68	532.27	522.75
298	636.74	609.31	606.42	515.46	515.46	629.92	602.37	592.39	520.26	511.94
299	636.74	610.75	609.31	515.46	515.46	636.24	605.25	597.17	516.92	513.53
300	636.74	613.64	610.75	515.46	515.46	623.5	592.08	585.49	514.13	513.5
301	630.97	612.19	610.75	681.5	511.13	623.15	640.2	633.83	667.35	509.33
302	630.97	615.08	612.19	681.5	511.13	627.28	633.72	618.25	674.04	502.7
303	630.97	616.53	615.08	681.5	509.68	631.41	636.85	623.35	682.84	508.4
304	630.97	617.97	616.53	681.5	509.68	634.86	626.22	622.33	660.06	511.42
305	630.97	622.3	620.86	680.06	509.68	632.8	637.25	621.41	671.13	500.18
306	630.97	625.19	622.3	680.06	509.68	630.11	634.49	624.19	674.87	502.54
307	629.52	626.63	625.19	680.06	509.68	633.75	636.34	639.87	674.92	512.05
308	629.52	629.52	626.63	680.06	509.68	620.6	643.95	646.85	681.53	507.19
309	629.52	633.85	630.97	680.06	509.68	626.09	639.93	629.44	669.81	498.89
310	629.52	635.3	633.85	680.06	509.68	621.79	651.96	656.68	680.58	518.05
311	629.52	636.74	635.3	680.06	509.68	621.05	651.95	657.3	680.37	518.92
312	629.52	639.63	636.74	680.06	509.68	624.09	641.51	664.61	690.17	521.45
313	629.52	643.96	641.07	678.61	508.24	627.32	652.23	647.07	684.58	503.25
314	629.52	645.4	643.96	678.61	508.24	629.27	659.98	652.6	678.37	506.69
315	628.08	648.29	645.4	678.61	508.24	625.71	647.34	654.67	671.96	509.8
316	628.08	649.74	648.29	678.61	508.24	624.86	648.31	668.1	679.89	512.45
317	628.08	654.07	651.18	678.61	508.24	626.22	664.74	668.48	683.79	500.71
318	628.08	655.51	654.07	678.61	508.24	624.04	659.64	663.95	682.67	508.37
319	628.08	658.4	655.51	678.61	508.24	626.98	666.39	669.81	693.62	507.12
320	628.08	659.84	658.4	678.61	508.24	627.91	670.09	665.14	668.34	502.97
321	628.08	662.73	662.73	677.17	508.24	626.93	673.04	681.35	684.18	506.09
322	628.08	662.73	664.17	677.17	508.24	627.97	670.38	674.49	679.18	497.06
323	628.08	662.73	667.06	677.17	508.24	624.63	669.08	666.42	670.84	501.89
324	628.08	662.73	668.51	677.17	508.24	620.26	673.36	658.02	656.92	492.06
325	626.63	661.29	672.84	677.17	506.79	626.14	664.63	668.52	672.92	502.84
326	626.63	661.29	674.28	677.17	506.79	626.74	659.61	662.13	676.7	509.64
327	626.63	661.29	677.17	677.17	506.79	626.1	670.27	680.99	685.94	510.13
328	626.63	661.29	678.61	677.17	506.79	624.49	669.36	685.21	676.14	508.65
329	626.63	661.29	682.94	677.17	506.79	636.23	668.15	690.38	693.62	511.11
330	626.63	661.29	685.83	677.17	506.79	632.29	672.63	679.48	673.57	513.19
331	626.63	661.29	687.28	677.17	506.79	621.13	665.66	680.37	674.18	503.08
332	626.63	661.29	690.16	677.17	506.79	625.19	664.53	700.08	675.41	518.95
333	626.63	661.29	694.49	677.17	506.79	622.76	662.6	700.26	681.16	502.24
334	626.63	661.29	695.94	677.17	506.79	628.1	659.02	690.2	670.52	497.6
335	626.63	661.29	698.83	677.17	506.79	624.47	661.73	696.04	670.67	509.73
336	626.63	661.29	700.27	677.17	506.79	629.65	662.87	692.34	662.8	509.11
337	626.63	661.29	704.6	675.72	506.79	619.62	658.2	710.82	679.15	518.83
338	626.63	661.29	707.49	675.72	506.79	621.18	665.28	702.43	668.12	503.55
339	626.63	661.29	708.93	675.72	506.79	626.04	665.59	708.29	664.98	498.05
340	626.63	661.29	711.82	675.72	506.79	627	669.47	706.45	665.83	495.87
341	626.63	659.84	714.71	675.72	506.79	622.32	663.46	706.45	671.48	506.7
342	625.19	659.84	717.6	675.72	506.79	631.35	666.81	707.09	659.93	503.29
343	625.19	659.84	719.04	675.72	506.79	621.3	667.59	708	657.75	500.82
344	625.19	659.84	721.93	675.72	506.79	621.32	663.13	714.94	667.93	502.89
345	625.19	659.84	726.26	675.72	506.79	616.82	668.35	710.88	671.33	490.06
346	625.19	659.84	727.7	675.72	505.35	631.08	652.07	708.58	663.91	500.17
347	625.19	659.84	730.59	675.72	505.35	621.18	658.49	694.32	660.99	480.43
348	625.19	659.84	732.03	675.72	505.35	625.6	661.45	718.73	667.41	516.75
349	625.19	659.84	736.37	675.72	505.35	616.55	657.83	742.53	681.71	521.11
350	625.19	659.84	739.25	675.72	505.35	620.99	654.25	715	665.08	510.39
351	625.19	659.84	740.7	675.72	505.35	620.15	660.14	729.39	662.01	504.25
352	625.19	659.84	743.59	675.72	505.35	620.91	661.26	729.13	659.77	503.52
353	625.19	659.84	747.92	674.28	505.35	621.94	657.7	745.07	666.58	516.02
354	625.19	659.84	749.36	674.28	505.35	618.51	664.73	715.03	657.88	499.21
355	625.19	659.84	750.81	674.28	505.35	620.11	661.42	745.85	668.73	506.97
356	625.19	659.84	753.69	674.28	505.35	617.37	659.88	758.78	658.78	515.11
357	625.19	658.4	758.02	674.28	505.35	616.13	667.74	758.61	672.83	512.44
358	625.19	658.4	759.47	674.28	505.35	618.52	657.38	769.48	677.53	512.31
359	625.19	658.4	762.36	674.28	505.35	612.18	654.99	774.92	683.48	520.16
360	623.75	658.4	763.8	674.28	505.35	617.12	667.05	736.42	664.37	506.87
361	619.41	652.62	762.36	668.51	668.51	609.74	647.26	773.52	665.15	652.68
362	619.41	652.62	763.8	668.51	668.51	614.95	653.55	765.94	651.86	637.2
363	619.41	652.62	766.69	668.51	668.51	615.13	651.32	768.65	661.78	649.87
364	619.41	652.62	768.13	668.51	668.51	613.56	657.6	771.52	666.41	652.68
365	619.41	652.62	772.46	668.51	668.51	610.49	654.9	803.64	683.24	662.25
366	617.97	652.62	773.91	668.51	668.51	617.25	653.63	792.18	671.68	663.51
367	617.97	652.62	776.79	668.51	668.51	620.34	647.33	764.37	650.9	642.43
368	617.97	652.62	778.24	668.51	668.51	617.68	647.37	765.16	654.57	641.2
369	617.97	652.62	782.57	667.06	667.06	610.77	652.04	754.99	655.96	648.97
370	617.97	652.62	785.46	667.06	667.06	614.38	648.12	784.35	665.59	652.61
371	617.97	652.62	786.9	667.06	667.06	607.49	656.21	782.65	668.29	651.74
372	617.97	652.62	789.79	667.06	667.06	615.46	652.84	784.73	663.32	655.4
373	617.97	652.62	792.68	667.06	667.06	620.72	656.35	804.53	675.21	663.24
374	617.97	652.62	795.56	667.06	667.06	618.15	652.94	809.81	673.05	659.11
375	617.97	652.62	797.01	667.06	667.06	614.19	656.06	792.78	675.07	652.97
376	617.97	651.18	799.9	667.06	667.06	613.87	656.78	779.27	656.52	641.03
377	617.97	651.18	804.23	667.06	667.06	610.05	653.23	821.13	678.97	660.63
378	617.97	651.18	805.67	667.06	667.06	610.68	653.83	835.48	686.71	668.26
379	617.97	651.18	808.56	667.06	667.06	619.36	650.18	825.44	675.45	658.6
380	617.97	651.18	810	667.06	667.06	615.74	652.69	824.11	678.71	662.97
381	617.97	651.18	814.33	667.06	667.06	620.04	643.75	799.45	661.84	670.4
382	617.97	651.18	815.78	667.06	667.06	618.31	655.79	810.69	672.49	658.26
383	616.53	651.18	818.67	667.06	667.06	613.17	652.06	819.67	671.43	659.53
384	616.53	651.18	820.11	667.06	667.06	613.72	650.15	795.43	660.15	630.38
385	616.53	651.18	824.44	665.62	665.62	616.62	655.78	818.65	662.7	645.9
386	616.53	651.18	827.33	665.62	665.62	620.41	658.41	834.66	667.24	668.86
387	616.53	651.18	828.77	665.62	665.62	621.3	659.1	833.41	668.38	666.53
388	616.53	651.18	830.22	665.62	665.62	608.19	645.62	823.78	663.03	660.11
389	616.53	651.18	834.55	665.62	665.62	612.19	654.2	843.99	677.42	662.89
390	616.53	651.18	837.44	665.62	665.62	606.18	646.79	835.78	657.44	646.56
391	616.53	651.18	838.88	665.62	665.62	607.97	651.76	835.08	662.69	651.01
392	616.53	651.18	841.77	665.62	665.62	613.85	651.7	865.16	684.23	665.32
393	616.53	649.74	844.66	665.62	665.62	612.04	651.85	868.56	699.08	661.45
394	616.53	649.74	847.54	665.62	665.62	617.81	655.45	857.96	666.02	667.27
395	616.53	649.74	848.99	665.62	665.62	608.73	652.08	837.65	660.1	663.45
396	616.53	649.74	851.88	665.62	665.62	599.77	649.32	851.68	685.72	655.36
397	616.53	649.74	856.21	665.62	665.62	614.57	653.44	862.91	676.87	653.67
398	616.53	649.74	857.65	665.62	665.62	608.57	642.14	851.05	662.52	649.59
399	616.53	649.74	860.54	665.62	665.62	611.38	652.68	850.44	661.89	641.85
400	616.53	649.74	861.98	665.62	665.62	611.15	648.46	850.45	668.67	657.19
401	615.08	649.74	866.31	665.62	665.62	608.48	645.78	864.77	664.27	666.64
402	615.08	649.74	867.76	664.17	664.17	605.24	649.59	860.38	659.01	647.1
403	615.08	649.74	870.65	664.17	664.17	609.25	651.44	861.83	670.83	649.59
404	615.08	649.74	872.09	664.17	664.17	608.28	647.73	857.62	669.76	645.9
405	615.08	649.74	876.42	664.17	664.17	606.33	654.12	879.77	663.19	656.72
406	615.08	649.74	877.86	664.17	664.17	612.45	644.63	858.72	672.2	647.75
407	615.08	649.74	880.75	664.17	664.17	623.61	651.66	905.18	672.83	668.58
408	615.08	649.74	882.2	664.17	664.17	610.49	646.54	856.13	666.23	649.36
409	609.31	643.96	879.31	824.44	658.4	605.97	645.94	889.17	798.21	651.59
410	609.31	643.96	882.2	824.44	658.4	608.48	634.25	870.8	809.88	638.87
411	609.31	643.96	883.64	824.44	658.4	598.1	621.33	890.7	816.09	643.46
412	609.31	643.96	885.08	824.44	658.4	607.47	633.62	886.09	814.34	655.91
413	609.31	642.52	889.42	823	658.4	602.32	634.35	897.81	814.19	647.63
414	609.31	642.52	892.3	823	658.4	601.97	629.35	895.17	808.99	653.08
415	609.31	642.52	893.75	823	658.4	602.8	630.62	902.77	827.2	647.94
416	609.31	642.52	896.63	823	658.4	603.57	632.55	907.72	830.15	654.27
417	609.31	642.52	899.52	823	658.4	606.9	636.61	896.02	818.4	637.2
418	609.31	642.52	902.41	823	658.4	604.44	629.41	899.54	812.04	642.24
419	609.31	642.52	903.85	823	658.4	606.98	635.75	913.33	827.21	652.14
420	609.31	642.52	906.74	823	658.4	601.81	633.22	914.34	823.58	659.06
421	609.31	642.52	909.63	823	656.95	608.78	637.76	907.32	821.54	653.44
422	609.31	642.52	912.52	823	656.95	606.34	639.93	911.27	820.91	652.89
423	609.31	642.52	913.96	823	656.95	601.73	633.51	907.11	818.37	648.72
424	609.31	642.52	916.85	823	656.95	606.14	638.98	915.64	813.63	655.04
425	609.31	642.52	921.18	821.55	656.95	598.5	635.31	916.88	815.13	650.47
426	609.31	642.52	922.62	821.55	656.95	597.49	632.6	926.2	822.15	647.81
427	607.86	642.52	924.07	821.55	656.95	605.19	627.21	926.01	822.99	652.52
428	607.86	642.52	926.96	821.55	656.95	604.45	625.31	925.6	823.9	649.91
429	607.86	642.52	931.29	821.55	656.95	602.91	640.98	924.68	813.94	651.27
430	607.86	642.52	932.73	821.55	656.95	600.86	636.88	934.67	820.3	657.55
431	607.86	641.07	934.17	821.55	656.95	601.48	636.52	933.27	818.14	649.88
432	607.86	641.07	937.06	821.55	656.95	608.27	641.36	934.46	820.82	661.63
433	607.86	641.07	941.39	821.55	656.95	607.54	641.13	941.44	810.12	661.43
434	607.86	641.07	942.84	821.55	656.95	606.83	641.5	950.88	816.68	653.89
435	607.86	641.07	944.28	821.55	656.95	604.78	642.91	952.29	818.01	656.33
436	607.86	641.07	947.17	821.55	656.95	600.23	635.9	947.35	816.64	656.35
437	607.86	641.07	951.5	821.55	656.95	602.86	638.9	949.1	811.98	647.74
438	607.86	641.07	952.94	821.55	655.51	600.16	635.71	953.22	818.86	645.88
439	607.86	641.07	955.83	820.11	655.51	596.76	631.95	941.96	814.47	640.34
440	607.86	641.07	957.28	820.11	655.51	604.47	645.33	945.71	809.87	653.74
441	609.31	642.52	958.72	820.11	655.51	600.28	633.14	947.38	816.01	640.11
442	610.75	645.4	958.72	820.11	655.51	607.58	633.11	946.88	809.6	658.6
443	613.64	646.85	958.72	820.11	655.51	610.77	644.93	951.66	817.64	651.16
444	615.08	648.29	958.72	820.11	655.51	614.29	645.72	953.29	818.59	659.16
445	619.41	652.62	958.72	820.11	655.51	604.4	637.82	938.27	820.19	645.07
446	620.86	655.51	957.28	820.11	655.51	606.74	651.35	951.23	813.58	649.77
447	622.3	656.95	957.28	818.67	655.51	605.72	649.8	951.65	814.85	646.27
448	625.19	658.4	957.28	818.67	654.07	613.47	652.75	949.2	803.1	648.63
449	628.08	662.73	957.28	818.67	654.07	627.87	668.37	952.51	813.98	661.16
450	630.97	665.62	957.28	818.67	654.07	614.55	656.6	951.08	814.9	649.78
451	632.41	667.06	957.28	818.67	654.07	611.65	651.87	939.79	801.47	643.81
452	633.85	668.51	955.83	818.67	654.07	617.22	658.71	940.74	809.11	639.17
453	638.18	672.84	955.83	817.22	654.07	619.12	667.33	949.11	813.17	635.43
454	639.63	674.28	955.83	817.22	654.07	634.64	670.63	946.71	813.67	645.04
455	641.07	677.17	955.83	817.22	654.07	631	665.83	943.19	808.87	643.73
456	643.96	678.61	955.83	817.22	654.07	639.31	681.44	950.03	825.78	654.05
457	646.85	682.94	954.39	817.22	652.62	636.9	681.06	949.21	811.56	645.41
458	649.74	684.39	954.39	817.22	652.62	653.1	682.6	942.47	804.54	654.09
459	651.18	687.28	954.39	817.22	652.62	644.48	677.28	948.45	810.33	655.39
460	652.62	688.72	954.39	817.22	652.62	630.89	662.26	940.01	802.47	644.95
461	656.95	693.05	954.39	815.78	652.62	655.77	693.75	956.09	814.29	666.97
462	658.4	694.49	954.39	815.78	652.62	642	683.14	953.32	819.4	655.42
463	659.84	697.38	954.39	815.78	652.62	648.75	690.29	957.7	817.9	647.78
464	662.73	698.83	952.94	815.78	652.62	636.34	676.19	940.59	813.64	638.64
465	665.62	703.16	952.94	815.78	651.18	635.98	681.16	941.4	804.28	628.83
466	668.51	704.6	952.94	815.78	651.18	651.29	703.23	944.45	810.26	658.66
467	669.95	707.49	952.94	814.33	651.18	659.82	696.84	945.93	810.25	656.18
468	671.39	708.93	952.94	814.33	651.18	659.66	696.47	945.61	810.8	654.86
469	675.72	713.26	951.5	814.33	651.18	664.12	702.84	932.21	807.39	647.23
470	677.17	714.71	951.5	814.33	651.18	659.23	697.68	940.19	806.8	644
471	678.61	716.15	951.5	814.33	651.18	678.79	714.54	941.25	806.38	654.69
472	681.5	719.04	951.5	814.33	651.18	665.54	703.11	937.88	802.03	643.17
473	684.39	723.37	951.5	814.33	649.74	663.37	700.4	946.83	802.23	643.2
474	687.28	724.82	951.5	812.89	649.74	657.59	699.28	951.58	795.79	634.17
475	688.72	726.26	950.06	812.89	649.74	648.84	686.04	932.39	804.28	628.82
476	690.16	729.15	950.06	812.89	649.74	670.82	712.65	934.71	802.27	643.32
477	694.49	732.03	950.06	812.89	649.74	696.86	735.88	931.65	797.6	663.6
478	695.94	734.92	950.06	812.89	649.74	689.75	724.47	935.91	789.33	654.77
479	697.38	736.37	950.06	812.89	649.74	656.07	693.6	933.55	797.77	629.81
480	700.27	737.81	950.06	812.89	649.74	686.25	720.12	942.41	805.44	658.93
481	697.38	736.37	941.39	805.67	805.67	718.05	761.57	933.39	801.51	801.28
482	700.27	737.81	941.39	805.67	805.67	719.39	748.92	917.94	793.71	784.95
483	701.71	740.7	941.39	805.67	805.67	714.43	745.4	937.14	808.87	815.24
484	703.16	742.14	941.39	805.67	805.67	715.97	746.74	937	808.67	813.14
485	707.49	746.47	939.95	804.23	804.23	713.64	740.62	927.68	791.01	801.06
486	708.93	747.92	939.95	804.23	804.23	717.83	756.51	933.88	796.21	797.65
487	710.38	750.81	939.95	804.23	804.23	706.06	739.32	921.95	797.62	776.66
488	713.26	752.25	939.95	804.23	804.23	718.97	760.99	937.82	802.4	794.69
489	716.15	756.58	939.95	804.23	804.23	716.01	739.26	924.26	800.06	779.69
490	719.04	758.02	939.95	804.23	804.23	715.45	740.39	923.97	798.83	779.05
491	720.48	759.47	939.95	802.78	802.78	726.05	756.63	928.76	799.44	802.16
492	721.93	762.36	938.51	802.78	802.78	724.7	756.35	931.07	802.51	794.13
493	726.26	765.24	938.51	802.78	802.78	716.31	753.15	937.36	791.7	794.26
494	727.7	768.13	938.51	802.78	802.78	727.86	768.28	931.03	797.1	793.82
495	729.15	769.58	938.51	802.78	802.78	742.39	782.78	926.17	797.88	802.47
496	730.59	771.02	938.51	802.78	802.78	735.69	774.11	918.57	792.65	787.96
497	734.92	775.35	937.06	802.78	802.78	711.51	749.8	910.73	787.61	775.6
498	736.37	776.79	937.06	801.34	801.34	722.79	764.47	924.55	789.44	784.23
499	739.25	779.68	937.06	801.34	801.34	732.01	760.19	926.43	791.51	789.61
500	740.7	781.13	937.06	801.34	801.34	737.8	784.63	917.86	799.67	795.66
501	743.59	785.46	937.06	801.34	801.34	773.4	818.08	926.95	813.12	801.04
502	746.47	786.9	937.06	801.34	801.34	731.17	764.16	934.36	794.8	793.73
503	747.92	788.35	937.06	801.34	801.34	719.94	755.95	930.82	788.45	776.51
504	749.36	791.23	935.62	801.34	801.34	728.99	766.47	926.1	798.01	772.75
505	753.69	794.12	935.62	799.9	799.9	766.3	802.37	927.97	807.67	784.17
506	755.14	797.01	935.62	799.9	799.9	750.74	792.87	930	795.65	788.56
507	756.58	798.45	935.62	799.9	799.9	746.23	789.43	929.96	793.56	786.97
508	759.47	799.9	935.62	799.9	799.9	745.02	787.57	931.32	800.3	788.82
509	762.36	804.23	934.17	799.9	799.9	760.47	807.09	924.22	814.02	782.16
510	763.8	805.67	934.17	799.9	799.9	747.99	795.57	932.27	799.27	771.4
511	766.69	808.56	934.17	799.9	799.9	770.6	804.23	921.92	798.69	788.54
512	768.13	810	934.17	799.9	799.9	757.2	795.75	916.62	788.53	778.5
513	771.02	814.33	934.17	798.45	798.45	771.63	800.16	916.57	802.78	775.67
514	773.91	815.78	934.17	798.45	798.45	785.25	825.23	928.89	805.36	797.66
515	775.35	817.22	934.17	798.45	798.45	768.16	802.83	932.09	784.69	796.37
516	776.79	820.11	932.73	798.45	798.45	771.65	812.45	927.6	800.89	793.72
517	781.13	823	932.73	798.45	798.45	768.53	808.26	928.94	790.57	792.78
518	782.57	825.89	932.73	798.45	798.45	777.33	813.86	923.42	796.39	774.63
519	784.01	827.33	932.73	798.45	798.45	777.72	831.8	936.14	800.47	786.64
520	785.46	828.77	932.73	797.01	797.01	766.44	814.83	918.29	793.69	782.06
521	789.79	833.1	932.73	797.01	797.01	797.25	852.03	931.62	793.9	794.44
522	791.23	834.55	931.29	797.01	797.01	780.29	818.49	920.81	786.17	790.59
523	792.68	837.44	931.29	797.01	797.01	788.54	832.03	923.74	789.1	784.21
524	795.56	838.88	931.29	797.01	797.01	789.78	837.46	921.32	789.42	785.22
525	798.45	843.21	931.29	797.01	797.01	801.97	851.72	928.4	802.02	792.32
526	799.9	844.66	931.29	797.01	797.01	782.05	826.06	926.45	789.18	787.3
527	802.78	846.1	931.29	795.56	795.56	781.09	826.4	929.75	780.18	781.7
528	804.23	848.99	929.84	795.56	795.56	786.93	828.59	917.99	791.42	781.52
529	808.56	851.88	929.84	795.56	795.56	785.16	822.51	915.96	784.77	780.53
530	810	854.76	929.84	795.56	795.56	799.62	834.2	919.3	784.93	784.31
531	811.45	856.21	929.84	795.56	795.56	799.61	837.29	918.35	776.79	793.88
532	812.89	857.65	929.84	795.56	795.56	797.66	835.3	919.07	778.84	796.37
533	817.22	861.98	929.84	795.56	795.56	803.59	838.33	914.38	775.84	791.09
534	818.67	863.43	928.4	794.12	794.12	804.59	844.07	917.44	776.01	788.04
535	820.11	866.31	928.4	794.12	794.12	812.83	855.24	920.18	781.07	788.37
536	823	867.76	928.4	794.12	794.12	820.49	858.07	921.68	787.63	772.89
537	825.89	870.65	928.4	794.12	794.12	811.14	844.42	910.12	791.07	780.84
538	827.33	873.53	928.4	794.12	794.12	803.16	842.92	910.07	785.67	780.27
539	830.22	874.98	928.4	794.12	794.12	835.65	883.75	921.27	793.19	782.23
540	831.66	876.42	928.4	794.12	794.12	825.84	869.47	911.88	793.68	782.56
541	828.77	873.53	919.74	944.28	786.9	838.47	874.39	907.57	930.73	772.55
542	830.22	876.42	919.74	944.28	786.9	836.97	867.75	903.52	932.82	769.86
543	831.66	877.86	919.74	944.28	786.9	839.13	889.55	913.6	945.57	771.09
544	833.1	879.31	919.74	944.28	786.9	846.69	891.59	909.87	937.06	771.1
545	837.44	883.64	919.74	944.28	786.9	844.89	888.51	912.21	945.73	770.94
546	838.88	885.08	918.29	944.28	785.46	842.36	880.2	902.17	940.42	765.5
547	840.32	886.53	918.29	944.28	785.46	844	882.32	901.71	940.13	766.15
548	843.21	889.42	918.29	942.84	785.46	858.79	908.73	921.35	941.54	782.29
549	846.1	892.3	918.29	942.84	785.46	845.6	897.2	907.69	935.43	776.05
550	847.54	895.19	918.29	942.84	785.46	843.85	896.88	902.59	929.87	774.27
551	850.43	896.63	918.29	942.84	785.46	838.94	880.84	902.42	932.87	759.87
552	851.88	898.08	918.29	942.84	785.46	846.37	892.74	908.7	934.29	771.23
553	854.76	902.41	916.85	942.84	784.01	856.62	908.1	913.95	937.63	779.08
554	856.21	903.85	916.85	941.39	784.01	857.87	920.32	918.86	943.65	788.82
555	859.09	905.3	916.85	941.39	784.01	853.94	913.36	913.58	943.68	780.46
556	860.54	908.19	916.85	941.39	784.01	855.23	912.19	907.92	934.53	783.7
557	863.43	911.07	916.85	941.39	784.01	863.36	908.9	897.18	920.94	760.01
558	866.31	913.96	916.85	941.39	784.01	863.41	908.18	897.81	920.21	760.87
559	867.76	915.4	915.4	941.39	784.01	866.52	923.12	909.34	930.5	779.52
560	869.2	916.85	915.4	941.39	784.01	860.84	920.87	911.35	924.88	771.55
561	870.65	921.18	916.85	939.95	782.57	865.85	922.95	904.12	933.41	767.95
562	870.65	922.62	919.74	939.95	782.57	857.93	912.8	912.14	927.7	780.23
563	870.65	924.07	921.18	939.95	782.57	860.28	909.03	903.68	914.18	774.8
564	870.65	926.96	922.62	939.95	782.57	860.49	914.63	913.84	923.7	767.48
565	869.2	929.84	926.96	939.95	782.57	862.43	939.96	921.38	934.51	785.67
566	869.2	931.29	928.4	938.51	782.57	856.8	910.69	910.06	909.49	768.61
567	869.2	934.17	929.84	938.51	782.57	867.24	938.85	930.3	934.71	777.75
568	869.2	935.62	932.73	938.51	782.57	867.85	934.3	926.18	933.27	774.44
569	869.2	939.95	935.62	938.51	781.13	862.37	935.83	928.71	927.81	779.89
570	869.2	941.39	938.51	938.51	781.13	868.6	939.33	931.08	925.05	784.98
571	869.2	942.84	939.95	938.51	781.13	870.07	933.92	923.35	931.73	770.19
572	869.2	944.28	941.39	938.51	781.13	868.14	934.78	926.22	926.13	774.67
573	867.76	948.61	945.73	937.06	781.13	866.83	945.14	931.92	929.85	769.81
574	867.76	950.06	947.17	937.06	781.13	867.02	940.08	928.46	927.88	765.86
575	867.76	952.94	948.61	937.06	781.13	862.84	931.99	924.45	915.17	770.79
576	867.76	954.39	951.5	937.06	779.68	867.33	940.22	929.83	920.53	762.47
577	867.76	957.28	954.39	937.06	779.68	870.91	964.73	953.2	926.6	786.4
578	867.76	960.16	955.83	935.62	779.68	866.6	944.69	934.1	914.49	765.15
579	866.31	961.61	958.72	935.62	779.68	861.2	955.77	940	930.89	772.38
580	866.31	963.05	960.16	935.62	779.68	868.43	960.78	937.56	920.75	767.42
581	866.31	967.38	963.05	935.62	779.68	863.4	970.14	944.95	938.9	772.44
582	866.31	968.83	965.94	935.62	779.68	867.3	976.49	957.91	931.17	790.84
583	866.31	970.27	967.38	935.62	778.24	855.21	978.11	958.68	932.49	787.34
584	866.31	973.16	968.83	935.62	778.24	868.87	959.87	952.16	917.46	772.96
585	864.87	976.05	973.16	934.17	778.24	867.95	959.57	952.15	914.52	773.12
586	864.87	977.49	974.6	934.17	778.24	866.74	956.53	944.36	923.95	765.04
587	864.87	980.38	976.05	934.17	778.24	863.76	975.75	964.8	923.74	780.2
588	864.87	981.82	978.93	934.17	778.24	862.18	965.55	954.89	934.42	769.98
589	864.87	984.71	981.82	934.17	778.24	853.81	945.08	944.59	909.09	752.3
590	864.87	987.6	983.27	934.17	776.79	858.63	948.92	946.87	914.12	747.3
591	864.87	989.04	986.15	932.73	776.79	864.95	963.5	956.77	921.82	779.98
592	863.43	990.49	987.6	932.73	776.79	861.06	974.31	957.59	920.37	769.13
593	863.43	994.82	990.49	932.73	776.79	856.98	976.18	967.71	910.32	791.59
594	863.43	996.26	993.37	932.73	776.79	860.22	984.24	970.25	917.42	764.81
595	863.43	997.7	994.82	932.73	776.79	859.39	984.58	971.06	917.81	764.36
596	863.43	1000.59	996.26	932.73	776.79	860.38	977.04	965.88	929.23	771.37
597	863.43	1003.48	1000.59	931.29	775.35	855.64	982.38	971.53	922.97	758.57
598	863.43	1004.92	1002.04	931.29	775.35	853.36	992.31	975.92	920.77	761.74
599	861.98	1007.81	1003.48	931.29	775.35	855.85	987.22	965.33	922.38	769.79
600	861.98	1009.26	1006.37	931.29	775.35	855.77	973.23	966.28	916.64	755.83
601	854.76	1004.92	1002.04	924.07	924.07	848.14	1005.43	1002.72	914.69	889.16
602	854.76	1006.37	1003.48	924.07	924.07	853.05	1018.16	1005.81	916.3	907.59
603	854.76	1009.26	1004.92	922.62	922.62	857.56	1018.44	1005.69	919.27	903.8
604	854.76	1010.7	1006.37	922.62	922.62	862.14	995.16	985.71	916.88	889.55
605	854.76	1013.59	1010.7	922.62	922.62	849.05	998.18	971.65	909.02	877.5
606	854.76	1016.47	1012.14	922.62	922.62	848.01	1008.96	1003.2	916.39	900.98
607	854.76	1017.92	1013.59	922.62	922.62	850.1	1008.23	1001.98	917.04	901.46
608	854.76	1019.36	1016.47	922.62	922.62	850.78	1022.89	1015.46	917.96	909.01
609	853.32	1023.69	1019.36	921.18	921.18	856.61	1021.72	1008.52	911.79	903.72
610	853.32	1025.14	1020.81	921.18	921.18	847.79	1037.41	1014.85	923.6	915.21
611	853.32	1026.58	1023.69	921.18	921.18	846.92	1006.57	995.01	917.36	890.73
612	853.32	1028.03	1025.14	921.18	921.18	852.33	1026.1	1015.61	916.71	909.16
613	853.32	1032.36	1028.03	921.18	921.18	849.64	1046.15	1031.39	920.58	915.34
614	853.32	1033.8	1030.91	921.18	921.18	848.13	1061.8	1051.47	921.97	933.82
615	851.88	1035.24	1032.36	921.18	921.18	840.4	1047.66	1030.16	916.39	921.48
616	851.88	1038.13	1033.8	919.74	919.74	846.75	1050.26	1037.18	916.3	918.12
617	851.88	1041.02	1038.13	919.74	919.74	849.47	1036.88	1024.64	919.41	901.76
618	851.88	1042.46	1039.58	919.74	919.74	846.6	1028.39	1016.17	908.48	904.07
619	851.88	1045.35	1041.02	919.74	919.74	845.28	1030.87	1014.57	910.6	904.04
620	851.88	1046.8	1042.46	919.74	919.74	846.08	1059.68	1048.03	926.47	908.45
621	851.88	1049.68	1046.8	919.74	919.74	846.78	1058.81	1048.94	927.77	914.2
622	850.43	1052.57	1048.24	918.29	918.29	849.04	1057.82	1051.18	921.11	921.61
623	850.43	1054.01	1049.68	918.29	918.29	848.78	1053.24	1041.94	908.86	914.72
624	850.43	1055.46	1051.13	918.29	918.29	847.48	1062.8	1042	916.75	907.21
625	850.43	1058.35	1055.46	918.29	918.29	848.29	1046.9	1029.44	915.83	899.46
626	850.43	1061.23	1056.9	918.29	918.29	851.61	1048.87	1041.93	918.52	890.27
627	850.43	1062.68	1058.35	918.29	918.29	839.47	1045.27	1036.83	911.17	887.75
628	850.43	1064.12	1061.23	918.29	918.29	843.43	1054.69	1041.74	907.02	903.75
629	848.99	1068.45	1064.12	916.85	916.85	850.14	1072.79	1063.72	926.27	908
630	848.99	1069.9	1065.57	916.85	916.85	846.23	1069.81	1051.64	918.91	902.1
631	848.99	1071.34	1068.45	916.85	916.85	840.23	1074.16	1061.32	908.88	908.64
632	848.99	1072.79	1069.9	916.85	916.85	840.04	1073.26	1063.24	906.61	913.95
633	848.99	1077.12	1072.79	916.85	916.85	840.34	1071.91	1059.49	910.67	908.33
634	848.99	1078.56	1074.23	916.85	916.85	842.4	1065.41	1054.58	903.34	905.96
635	848.99	1080	1077.12	915.4	915.4	845.39	1106.37	1099.03	926.71	917.02
636	847.54	1082.89	1078.56	915.4	915.4	838.48	1092.89	1076.57	914.08	907.31
637	847.54	1085.78	1081.45	915.4	915.4	842.42	1104.48	1084.21	917.49	911.76
638	847.54	1087.22	1084.34	915.4	915.4	842.21	1109.85	1095.29	908	919.36
639	847.54	1088.67	1085.78	915.4	915.4	849.1	1090.8	1068.03	909.09	910.45
640	847.54	1091.56	1087.22	915.4	915.4	841.25	1078.48	1060.72	920.29	904.64
641	847.54	1094.44	1091.56	913.96	913.96	843.59	1074.26	1059.26	899.23	908.34
642	846.1	1095.89	1093	913.96	913.96	843.11	1085.07	1075.96	905.4	906.6
643	846.1	1098.77	1094.44	913.96	913.96	842.02	1104.07	1103.56	907.51	913.97
644	846.1	1100.22	1095.89	913.96	913.96	844.77	1105.59	1104.91	924	920.16
645	846.1	1103.11	1100.22	913.96	913.96	848.34	1119.08	1125.45	939.78	930.47
646	846.1	1105.99	1101.66	913.96	913.96	831.67	1090.17	1088.18	914.85	906.15
647	846.1	1107.44	1103.11	913.96	913.96	838.01	1092.69	1088.95	891.94	901.1
648	846.1	1108.88	1104.55	912.52	912.52	843.73	1107.96	1088.5	918.06	907.78
649	844.66	1111.77	1108.88	912.52	912.52	838.99	1108.68	1089.7	902.24	916.17
650	844.66	1114.66	1110.33	912.52	912.52	848.25	1119.78	1109.78	920.36	918.31
651	844.66	1116.1	1111.77	912.52	912.52	834.05	1106.39	1099.91	922.39	906.61
652	844.66	1117.54	1113.21	912.52	912.52	840.26	1128.81	1123.63	929.51	917.37
653	844.66	1121.88	1117.54	912.52	912.52	838.65	1100.05	1088.62	896.67	910.93
654	844.66	1123.32	1118.99	911.07	911.07	833.68	1109.08	1094.79	901.9	906.64
655	844.66	1124.76	1120.43	911.07	911.07	840.22	1123.33	1102.6	899.81	900.42
656	844.66	1126.21	1121.88	911.07	911.07	841.33	1116.85	1106.01	902.76	913.12
657	843.21	1130.54	1126.21	911.07	911.07	841.7	1124.39	1114.46	920.97	913.96
658	843.21	1131.98	1127.65	911.07	911.07	841.75	1131.64	1138.81	939.09	907.77
659	843.21	1133.43	1129.1	911.07	911.07	837.93	1129.57	1113.19	902.83	895.56
660	843.21	1134.87	1131.98	911.07	911.07	844.63	1139	1134.51	913.76	912.19
661	835.99	1130.54	1126.21	1054.01	903.85	839.6	1139.08	1119.69	1044.62	894.88
662	835.99	1131.98	1127.65	1054.01	902.41	836.33	1148.07	1134.12	1068.54	892.81
663	835.99	1133.43	1129.1	1054.01	902.41	835.29	1146.77	1131.09	1058.88	899.15
664	835.99	1134.87	1131.98	1054.01	902.41	837.38	1151.58	1129.81	1048.98	897.92
665	835.99	1139.2	1134.87	1052.57	902.41	837.56	1154.59	1139.28	1065.23	896.51
666	835.99	1140.65	1136.31	1052.57	902.41	842.87	1146.2	1124.01	1048.45	891.7
667	835.99	1142.09	1139.2	1052.57	902.41	824.1	1136.79	1124.07	1045.07	900.27
668	834.55	1143.53	1140.65	1052.57	902.41	825.66	1148.85	1140.24	1053.55	899.78
669	834.55	1147.87	1143.53	1052.57	900.97	829.99	1151.28	1139.08	1049.35	886.46
670	834.55	1149.31	1144.98	1052.57	900.97	828.5	1148.04	1131.59	1039.39	891.34
671	834.55	1150.75	1147.87	1051.13	900.97	832.85	1155.23	1141.38	1043.76	886.17
672	834.55	1152.2	1149.31	1051.13	900.97	826.55	1158.75	1142.08	1057.72	889.67
673	834.55	1156.53	1152.2	1051.13	900.97	827.98	1171.76	1146.88	1052.2	884.86
674	834.55	1157.97	1153.64	1051.13	900.97	829.56	1165.52	1155.25	1062.29	893.46
675	833.1	1159.42	1156.53	1051.13	899.52	827.09	1165.7	1151.79	1052.68	887.97
676	833.1	1160.86	1157.97	1051.13	899.52	830.58	1158.85	1147.95	1048.42	893.61
677	833.1	1165.19	1160.86	1049.68	899.52	835.45	1174.42	1159.25	1042.78	905.53
678	833.1	1166.64	1162.3	1049.68	899.52	829.97	1174.7	1162.79	1052.77	896.59
679	833.1	1168.08	1163.75	1049.68	899.52	831.13	1173.61	1162.25	1046.51	893.07
680	833.1	1169.52	1166.64	1049.68	899.52	836.02	1155.44	1163.42	1038.79	910.57
681	833.1	1172.41	1169.52	1049.68	899.52	827.74	1173.84	1160.57	1050.04	889.41
682	833.1	1172.41	1170.97	1049.68	899.52	824.62	1171.73	1152.37	1041.2	883.65
683	831.66	1170.97	1173.85	1048.24	898.08	820.28	1158.88	1148.73	1035.35	876.45
684	831.66	1170.97	1175.3	1048.24	898.08	818.83	1166.06	1152.85	1029.43	873.6
685	831.66	1170.97	1179.63	1048.24	898.08	832.08	1176.23	1170.74	1047.05	895.39
686	831.66	1170.97	1181.07	1048.24	898.08	821.67	1163.22	1169.11	1045.02	903.05
687	831.66	1170.97	1182.52	1048.24	898.08	818.25	1176.51	1175.65	1037.03	891.51
688	831.66	1170.97	1183.96	1048.24	898.08	817.61	1175.12	1175.41	1036.91	889.07
689	831.66	1170.97	1188.29	1048.24	898.08	820.37	1177.22	1173.75	1038.34	887.1
690	831.66	1170.97	1189.74	1048.24	898.08	826.39	1172.9	1191.15	1029.09	906.5
691	831.66	1170.97	1191.18	1048.24	898.08	830.02	1174	1188.59	1027.09	908.22
692	831.66	1170.97	1194.07	1048.24	898.08	824.8	1169.08	1177.71	1028.87	906.98
693	831.66	1169.52	1196.96	1048.24	898.08	819.29	1167.4	1178.72	1037.36	896.11
694	831.66	1169.52	1198.4	1048.24	898.08	815.84	1164.92	1187.54	1033.31	880.7
695	831.66	1169.52	1201.29	1046.8	898.08	815.55	1160.53	1183.33	1032.81	878.58
696	831.66	1169.52	1202.73	1046.8	896.63	815.55	1160.53	1183.33	1032.81	878.58
697	830.22	1169.52	1207.06	1046.8	896.63	817.34	1165.4	1170.55	1018.93	878.72
698	830.22	1169.52	1208.51	1046.8	896.63	818.79	1172.17	1184.39	1029.58	876.88
699	830.22	1169.52	1209.95	1046.8	896.63	822.49	1163.85	1185.51	1023.42	893.29
700	830.22	1169.52	1211.4	1046.8	896.63	818.08	1170.69	1190.82	1026.85	887.64
701	830.22	1169.52	1215.73	1046.8	896.63	812.43	1175.99	1204.34	1039.4	875.57
702	830.22	1169.52	1217.17	1046.8	896.63	818.04	1171.26	1202.3	1040.81	879.91
703	830.22	1168.08	1218.61	1046.8	896.63	817.93	1174.8	1186.74	1034.29	881
704	830.22	1168.08	1221.5	1046.8	896.63	816.17	1171.74	1209.11	1047.72	893.59
705	830.22	1168.08	1224.39	1046.8	896.63	810.95	1177.93	1212.44	1035.46	879.77
706	830.22	1168.08	1225.83	1045.35	896.63	820.83	1165.72	1222.54	1052.8	895.21
707	830.22	1168.08	1228.72	1045.35	896.63	812.17	1175.85	1208.07	1050.66	879.6
708	830.22	1168.08	1230.17	1045.35	896.63	822	1167.17	1210.71	1033.75	904.64
709	830.22	1168.08	1234.5	1045.35	895.19	818.96	1166.7	1213.74	1027.79	882.85
710	830.22	1168.08	1235.94	1045.35	895.19	818.77	1165.2	1215.59	1029.2	876.58
711	830.22	1168.08	1237.38	1045.35	895.19	819.49	1164.93	1211.74	1030.52	888.55
712	828.77	1168.08	1238.83	1045.35	895.19	821.33	1171.2	1226.41	1032.34	902.77
713	828.77	1166.64	1243.16	1045.35	895.19	821.03	1168.33	1218.32	1038.49	899.3
714	828.77	1166.64	1244.6	1045.35	895.19	819.52	1169.54	1229.04	1044.89	892
715	828.77	1166.64	1246.05	1045.35	895.19	813.64	1176.96	1224.51	1046.66	889.72
716	828.77	1166.64	1248.94	1045.35	895.19	819.85	1164.95	1225.52	1042.79	897.97
717	828.77	1166.64	1251.82	1043.91	895.19	817.09	1168.55	1225.09	1013.1	894.2
718	828.77	1166.64	1253.27	1043.91	895.19	810.57	1171.27	1226.28	1020.49	870.38
719	828.77	1166.64	1256.15	1043.91	895.19	811.05	1168.09	1228.6	1035.74	879.41
720	828.77	1166.64	1257.6	1043.91	895.19	810.15	1172.12	1233	1029.18	890.26
721	824.44	1157.97	1250.38	1036.69	1036.69	823.64	1158.22	1225.89	1034.29	1004.38
722	825.89	1157.97	1250.38	1036.69	1036.69	793.01	1159.9	1227.71	1023.72	988.72
723	827.33	1157.97	1250.38	1036.69	1036.69	801.46	1169.1	1245.05	1015.17	1008.21
724	828.77	1157.97	1248.94	1036.69	1036.69	811.26	1158.34	1244.77	1018.81	1009.71
725	833.1	1156.53	1248.94	1035.24	1035.24	844.37	1150.99	1237.38	1039.6	1030.2
726	834.55	1156.53	1248.94	1035.24	1035.24	825.74	1153.81	1246.96	1038.72	1021.49
727	835.99	1156.53	1248.94	1035.24	1035.24	825.44	1158.23	1229.99	1034.54	1012.1
728	838.88	1156.53	1248.94	1035.24	1035.24	826.03	1159.47	1239.82	1039.6	1007.93
729	841.77	1156.53	1248.94	1035.24	1035.24	845.03	1153.87	1249.07	1046.47	1029.13
730	843.21	1156.53	1248.94	1035.24	1035.24	862.44	1161.35	1245.02	1040.42	1029.6
731	844.66	1156.53	1248.94	1035.24	1035.24	838.57	1156.62	1240.58	1029.82	1033.77
732	847.54	1156.53	1248.94	1035.24	1035.24	840.84	1164.12	1238.5	1029.82	1015.08
733	850.43	1156.53	1247.49	1035.24	1035.24	841.82	1150.89	1233.37	1034.56	1014.7
734	851.88	1156.53	1247.49	1035.24	1035.24	849.09	1155.72	1245.17	1032.14	1028.39
735	853.32	1156.53	1247.49	1035.24	1035.24	850.41	1162.97	1251.47	1032.11	1039.55
736	856.21	1155.08	1247.49	1035.24	1035.24	849.36	1163.37	1248.32	1029.15	1029.67
737	859.09	1155.08	1247.49	1033.8	1033.8	865.17	1152.99	1250.85	1038.42	1020.41
738	860.54	1155.08	1247.49	1033.8	1033.8	864.08	1156.67	1242.14	1033.36	1026.4
739	863.43	1155.08	1247.49	1033.8	1033.8	844.28	1156.81	1248.99	1020.28	1024.63
740	864.87	1155.08	1247.49	1033.8	1033.8	854.61	1158.38	1242.11	1031.16	1019.03
741	867.76	1155.08	1247.49	1033.8	1033.8	863.22	1158.82	1240.65	1032.39	1023.83
742	869.2	1155.08	1247.49	1033.8	1033.8	873.41	1155.99	1252.31	1027.22	1039.51
743	872.09	1155.08	1247.49	1033.8	1033.8	853.62	1158.77	1226.08	1022.23	1008.33
744	873.53	1155.08	1246.05	1033.8	1033.8	867.21	1156.01	1242.12	1030.91	1030.76
745	876.42	1155.08	1246.05	1033.8	1033.8	848.96	1157.46	1241.51	1026.57	1015.9
746	877.86	1153.64	1246.05	1033.8	1033.8	852.77	1149.87	1235.63	1037.57	1012.01
747	880.75	1153.64	1246.05	1033.8	1033.8	851.04	1156.31	1248.66	1027.79	1018.16
748	882.2	1153.64	1246.05	1033.8	1033.8	849.49	1157.04	1247.19	1026.95	1016.69
749	885.08	1153.64	1246.05	1033.8	1033.8	899.26	1153.08	1236.78	1043.25	1043.03
750	887.97	1153.64	1246.05	1032.36	1032.36	876.6	1144.78	1232.11	1022.7	1016.33
751	889.42	1153.64	1246.05	1032.36	1032.36	874.78	1144.81	1232.63	1021.56	1014.71
752	890.86	1153.64	1246.05	1032.36	1032.36	873.42	1152.77	1227.88	1024.03	1000.09
753	893.75	1153.64	1246.05	1032.36	1032.36	895.9	1153.4	1242.67	1032.86	1043.05
754	896.63	1153.64	1244.6	1032.36	1032.36	888.59	1154.58	1247.65	1028.07	1021.22
755	898.08	1153.64	1244.6	1032.36	1032.36	882.14	1159.34	1251.87	1020.21	1018.16
756	899.52	1153.64	1244.6	1032.36	1032.36	872.29	1149.9	1243.33	1031.4	1007.1
757	902.41	1152.2	1244.6	1032.36	1032.36	915.04	1158.02	1246.13	1046.07	1038.78
758	905.3	1152.2	1244.6	1032.36	1032.36	900.64	1157.74	1241.23	1027.5	1021.52
759	906.74	1152.2	1244.6	1032.36	1032.36	915.82	1166.16	1238.73	1048	1027.78
760	908.19	1152.2	1244.6	1032.36	1032.36	901.71	1152.92	1236.32	1034.59	1026.6
761	911.07	1152.2	1244.6	1032.36	1032.36	892.07	1149.52	1234.14	1047.98	1011.6
762	913.96	1152.2	1244.6	1030.91	1030.91	911.06	1165.04	1236.02	1039.63	1028.69
763	915.4	1152.2	1244.6	1030.91	1030.91	910.74	1157.56	1244.64	1039.53	1036.03
764	916.85	1152.2	1244.6	1030.91	1030.91	905.03	1157.07	1246.27	1037.52	1033.31
765	919.74	1152.2	1243.16	1030.91	1030.91	901.39	1161.15	1247.76	1031.49	1040.04
766	922.62	1152.2	1243.16	1030.91	1030.91	910	1157.86	1240	1041.73	1029.48
767	924.07	1152.2	1243.16	1030.91	1030.91	912.45	1156.97	1240.53	1042.55	1043.53
768	925.51	1152.2	1243.16	1030.91	1030.91	915.76	1154.08	1233.5	1028.84	1028.48
769	928.4	1150.75	1243.16	1030.91	1030.91	937.38	1151.44	1229.96	1057.62	1041.45
770	931.29	1150.75	1243.16	1030.91	1030.91	921.99	1152.92	1246.66	1026.24	1037.21
771	932.73	1150.75	1243.16	1030.91	1030.91	921.51	1154.56	1245.49	1025.67	1036.72
772	934.17	1150.75	1243.16	1030.91	1030.91	928.31	1158.56	1241.59	1036.81	1039.92
773	937.06	1150.75	1243.16	1030.91	1030.91	958.73	1158.42	1245.03	1063.14	1040.87
774	939.95	1150.75	1243.16	1029.47	1029.47	925.25	1155.56	1235.03	1043.16	1021.14
775	941.39	1150.75	1241.72	1029.47	1029.47	960.64	1158.96	1254.27	1060.73	1046.45
776	942.84	1150.75	1241.72	1029.47	1029.47	950.58	1164.14	1252.42	1034.44	1047.12
777	945.73	1150.75	1241.72	1029.47	1029.47	949.38	1161.37	1256.38	1044.17	1037
778	948.61	1150.75	1241.72	1029.47	1029.47	946.23	1153.26	1247.24	1057.13	1025.91
779	950.06	1150.75	1241.72	1029.47	1029.47	911.47	1156.27	1235.6	1032.88	1016.03
780	951.5	1149.31	1241.72	1029.47	1029.47	926.65	1147.25	1237.52	1058.9	1013.71
781	948.61	1142.09	1233.05	1168.08	1022.25	941.69	1141.26	1221.83	1142.13	1022.64
782	950.06	1140.65	1231.61	1168.08	1022.25	948.77	1148.32	1236.72	1154.94	1021.51
783	951.5	1140.65	1231.61	1168.08	1022.25	959.1	1149.89	1231.88	1166.22	1025.34
784	952.94	1140.65	1231.61	1168.08	1022.25	958.09	1152.22	1232.18	1161.62	1024.86
785	957.28	1140.65	1231.61	1168.08	1020.81	966.89	1139.89	1226.66	1163.34	1034.44
786	958.72	1140.65	1231.61	1168.08	1020.81	960.98	1142.7	1225.34	1162.2	1017.05
787	960.16	1140.65	1231.61	1168.08	1020.81	959.43	1142.9	1226.21	1160.6	1020.26
788	961.61	1140.65	1231.61	1166.64	1020.81	983.48	1153.67	1236.16	1172.93	1030.07
789	965.94	1140.65	1231.61	1166.64	1020.81	969.86	1144.98	1224.56	1166.83	1028.71
790	967.38	1140.65	1231.61	1166.64	1020.81	963.7	1142.64	1233.88	1167.32	1010.93
791	968.83	1140.65	1231.61	1166.64	1020.81	971.11	1137.11	1228.12	1169.31	1023.85
792	970.27	1140.65	1231.61	1166.64	1020.81	972.67	1133.9	1231.89	1162.39	1024.77
793	974.6	1139.2	1230.17	1166.64	1020.81	990.22	1145.78	1223.94	1176.38	1024.82
794	976.05	1139.2	1230.17	1166.64	1020.81	976.13	1140.72	1222.01	1159.48	1011.79
795	977.49	1139.2	1230.17	1166.64	1020.81	1009.08	1148.9	1233.8	1194.7	1036.15
796	978.93	1139.2	1230.17	1166.64	1020.81	996.99	1144.89	1228.64	1175.51	1028.93
797	981.82	1139.2	1230.17	1166.64	1019.36	965.9	1140.13	1232.64	1178.58	1007.92
798	984.71	1139.2	1230.17	1166.64	1019.36	999.12	1144.96	1228.69	1173.68	1024.53
799	986.15	1139.2	1230.17	1165.19	1019.36	986.77	1139.63	1235.38	1186.88	1031.58
800	987.6	1139.2	1230.17	1165.19	1019.36	1001.59	1142.28	1234.17	1180.02	1031.36
801	990.49	1140.65	1230.17	1165.19	1019.36	985.28	1147.48	1226.1	1174.12	1014.21
802	991.93	1142.09	1228.72	1165.19	1019.36	969.83	1146.05	1232.3	1163.73	1008.36
803	994.82	1143.53	1228.72	1165.19	1019.36	990.1	1152.89	1237.54	1169.58	1017.72
804	996.26	1144.98	1228.72	1165.19	1019.36	998.13	1140.21	1218.59	1167.91	1023.33
805	999.15	1149.31	1228.72	1163.75	1017.92	998.88	1159.66	1223.68	1163.01	1027.51
806	1000.59	1150.75	1228.72	1163.75	1017.92	991.99	1155.19	1235.59	1167.23	1023.75
807	1002.04	1152.2	1227.28	1163.75	1017.92	961.68	1142.34	1237.22	1155.19	991.66
808	1003.48	1153.64	1227.28	1163.75	1017.92	981.62	1159.42	1216.9	1141.02	1002.59
809	1007.81	1157.97	1227.28	1163.75	1017.92	977.45	1151.77	1226.53	1154.76	1012.04
810	1009.26	1159.42	1227.28	1163.75	1017.92	976.03	1151.31	1226.79	1154.08	1011.25
811	1010.7	1160.86	1227.28	1162.3	1017.92	1002.77	1149.93	1230.51	1159.61	1029.43
812	1012.14	1162.3	1227.28	1162.3	1016.47	1018.66	1151.9	1230.52	1172.03	1017.79
813	1015.03	1166.64	1225.83	1162.3	1016.47	1042.74	1181.88	1219.87	1173.74	1047.63
814	1016.47	1168.08	1225.83	1162.3	1016.47	1054.47	1185.42	1225.3	1172.81	1043.13
815	1017.92	1169.52	1225.83	1162.3	1016.47	1027.2	1172.76	1228.39	1175.3	1051.9
816	1020.81	1170.97	1225.83	1162.3	1016.47	1028.14	1158.08	1225.4	1163.32	1031.13
817	1023.69	1173.85	1224.39	1160.86	1015.03	1039.36	1182.69	1226.51	1178.75	1036.8
818	1025.14	1175.3	1224.39	1160.86	1015.03	1043.24	1169.53	1214.25	1168.81	1025.3
819	1026.58	1178.19	1224.39	1160.86	1015.03	1012.07	1154.91	1216	1150.77	996.66
820	1028.03	1179.63	1224.39	1160.86	1015.03	1015.28	1172.14	1221.32	1155.46	1004.13
821	1030.91	1182.52	1224.39	1159.42	1015.03	1009.88	1177.52	1229.43	1164.21	1000.6
822	1032.36	1183.96	1222.95	1159.42	1015.03	1028.32	1177.35	1228.81	1172.07	1016.96
823	1035.24	1185.41	1222.95	1159.42	1015.03	1020.72	1172.57	1218.52	1166.05	1010.05
824	1036.69	1188.29	1222.95	1159.42	1013.59	1017.29	1172.29	1220.99	1161.71	1006.06
825	1039.58	1191.18	1222.95	1159.42	1013.59	1050.17	1187.09	1217.08	1165.63	1020.33
826	1041.02	1192.63	1222.95	1159.42	1013.59	1048.02	1191.91	1224.61	1161.63	1026.01
827	1042.46	1194.07	1222.95	1157.97	1013.59	1063.14	1204.45	1225.63	1182.55	1045.07
828	1043.91	1195.51	1221.5	1157.97	1013.59	1075.47	1217.8	1214.83	1179.35	1046.64
829	1046.8	1199.84	1221.5	1157.97	1013.59	1054.15	1200.36	1221.71	1162.28	1029.1
830	1049.68	1201.29	1221.5	1157.97	1012.14	1053.66	1198.82	1220.14	1163.01	1029.7
831	1051.13	1202.73	1221.5	1157.97	1012.14	1067.22	1211.93	1216.04	1172.75	1048.61
832	1052.57	1204.18	1221.5	1157.97	1012.14	1045.29	1197.15	1223.32	1167.94	1026.2
833	1055.46	1208.51	1220.06	1156.53	1012.14	1043.37	1208.86	1215.92	1153.96	1018.28
834	1056.9	1209.95	1220.06	1156.53	1012.14	1014.98	1185.04	1224.87	1149.26	992.24
835	1058.35	1211.4	1220.06	1156.53	1012.14	1082.07	1227.46	1224.17	1168.7	1032
836	1059.79	1212.84	1220.06	1156.53	1012.14	1071.87	1220.28	1216.96	1169.73	1021.61
837	1062.68	1215.73	1220.06	1156.53	1010.7	1029.85	1196.91	1215.99	1148.24	1004.52
838	1065.57	1217.17	1218.61	1155.08	1010.7	1058.02	1207.67	1223	1154.69	1003.63
839	1067.01	1220.06	1218.61	1155.08	1010.7	1071.54	1222.22	1230.43	1161.72	1026.66
840	1068.45	1221.5	1218.61	1155.08	1010.7	1067	1221.09	1224.54	1157.55	1019.7
841	1064.12	1215.73	1209.95	1146.42	1146.42	1087.01	1219.46	1218.38	1157.69	1143.99
842	1065.57	1217.17	1209.95	1146.42	1146.42	1080.15	1235.34	1211.41	1155.33	1138.18
843	1067.01	1218.61	1208.51	1146.42	1146.42	1076.44	1232.53	1212.79	1140.97	1137.52
844	1068.45	1220.06	1208.51	1146.42	1146.42	1073.16	1219.78	1215.47	1147.65	1131.97
845	1071.34	1224.39	1208.51	1144.98	1144.98	1100.9	1247.84	1202.66	1159.82	1150.97
846	1072.79	1225.83	1208.51	1144.98	1144.98	1082.44	1231.42	1205.99	1151.53	1150.45
847	1074.23	1227.28	1208.51	1144.98	1144.98	1066.79	1220.01	1207.23	1150.81	1143.45
848	1075.67	1228.72	1208.51	1144.98	1144.98	1063.82	1235.6	1209.72	1154.9	1146.48
849	1080	1231.61	1207.06	1144.98	1144.98	1090.57	1244.19	1199.86	1153.39	1147.37
850	1081.45	1234.5	1207.06	1144.98	1144.98	1102.5	1241.6	1194.09	1158.93	1158.29
851	1082.89	1235.94	1207.06	1143.53	1143.53	1058.58	1234.98	1215.65	1127.56	1145.59
852	1084.34	1237.38	1207.06	1143.53	1143.53	1080.75	1225.51	1199.58	1139.9	1149.31
853	1087.22	1240.27	1205.62	1143.53	1143.53	1089.24	1246.49	1201.25	1149.13	1154.74
854	1088.67	1241.72	1205.62	1143.53	1143.53	1074.58	1230.7	1204.29	1146.04	1148.89
855	1090.11	1243.16	1205.62	1143.53	1143.53	1082.24	1240.5	1201.65	1131.83	1139.69
856	1091.56	1244.6	1205.62	1143.53	1143.53	1081.94	1239.16	1199.21	1138.03	1143.01
857	1094.44	1248.94	1205.62	1142.09	1142.09	1096.09	1238.69	1195.8	1137.49	1149.31
858	1097.33	1250.38	1205.62	1142.09	1142.09	1081.96	1239.02	1202.6	1133.83	1130.98
859	1098.77	1251.82	1204.18	1142.09	1142.09	1129.3	1277.64	1188.71	1138.61	1152.75
860	1100.22	1253.27	1204.18	1142.09	1142.09	1121.13	1257.56	1188.08	1135.93	1137.72
861	1103.11	1256.15	1204.18	1142.09	1142.09	1096.69	1253.47	1200.65	1140.42	1137.13
862	1104.55	1259.04	1204.18	1140.65	1140.65	1102.71	1254.47	1199.67	1137.23	1146.56
863	1105.99	1260.49	1204.18	1140.65	1140.65	1085.29	1238.02	1201.35	1144.24	1112.78
864	1107.44	1261.93	1204.18	1140.65	1140.65	1097.12	1242.73	1197.07	1139.07	1142.48
865	1110.33	1264.82	1202.73	1140.65	1140.65	1113.58	1272.19	1195.85	1142.26	1137.98
866	1111.77	1266.26	1202.73	1140.65	1140.65	1108.65	1263.62	1196.3	1140.05	1136.35
867	1114.66	1267.71	1202.73	1140.65	1140.65	1115.54	1273.93	1190.51	1134.46	1131.21
868	1116.1	1269.15	1202.73	1139.2	1139.2	1133.54	1280.86	1189.07	1141.73	1144.45
869	1118.99	1273.48	1201.29	1139.2	1139.2	1099.59	1284.47	1196.04	1140.51	1142.39
870	1120.43	1274.92	1201.29	1139.2	1139.2	1111.64	1279.51	1189.61	1143.14	1137.86
871	1121.88	1276.37	1201.29	1139.2	1139.2	1132.63	1281.61	1195.8	1146.29	1147.46
872	1123.32	1277.81	1201.29	1139.2	1139.2	1127.02	1278.29	1198.95	1142.68	1142.03
873	1126.21	1280.7	1201.29	1137.76	1137.76	1132.91	1290.85	1193.97	1143.28	1147.48
874	1127.65	1283.59	1201.29	1137.76	1137.76	1118.36	1270.64	1185.24	1134.47	1134.56
875	1129.1	1285.03	1199.84	1137.76	1137.76	1125.27	1291.23	1188.42	1137.29	1139.71
876	1130.54	1286.48	1199.84	1137.76	1137.76	1147.67	1307.02	1192.87	1137.87	1138.09
877	1134.87	1289.36	1199.84	1137.76	1137.76	1135.23	1277.46	1192.69	1137.26	1140.86
878	1136.31	1290.81	1199.84	1137.76	1137.76	1136.03	1277.27	1192.63	1137.54	1139.23
879	1137.76	1292.25	1199.84	1136.31	1136.31	1141.96	1291.16	1189.45	1142.12	1134.55
880	1139.2	1293.69	1199.84	1136.31	1136.31	1142.47	1298.92	1191.85	1144.46	1140.33
881	1142.09	1298.03	1198.4	1136.31	1136.31	1145.89	1298.55	1195.96	1160.06	1137.97
882	1143.53	1299.47	1198.4	1136.31	1136.31	1138.93	1294.3	1190.37	1144.42	1135.96
883	1144.98	1300.91	1198.4	1136.31	1136.31	1142.41	1301.94	1192.34	1137.12	1138.57
884	1146.42	1302.36	1198.4	1136.31	1136.31	1120.95	1281.08	1208.43	1131.88	1127.69
885	1149.31	1305.25	1196.96	1134.87	1134.87	1130.85	1279.17	1203.29	1136.2	1126.91
886	1150.75	1306.69	1196.96	1134.87	1134.87	1162.67	1306.87	1185.78	1138.68	1136.08
887	1152.2	1308.13	1196.96	1134.87	1134.87	1155.52	1298.59	1186.6	1142.58	1136.21
888	1155.08	1311.02	1196.96	1134.87	1134.87	1138.46	1287.46	1189.45	1127	1141.4
889	1157.97	1313.91	1196.96	1134.87	1134.87	1170.83	1327.16	1187.91	1142.34	1131.87
890	1159.42	1315.35	1196.96	1133.43	1133.43	1175.02	1335.23	1186.59	1134.3	1131.35
891	1160.86	1316.8	1195.51	1133.43	1133.43	1183.15	1343.6	1179.7	1133.45	1126.85
892	1162.3	1318.24	1195.51	1133.43	1133.43	1162.31	1309.87	1180.52	1141.89	1131.21
893	1165.19	1321.13	1195.51	1133.43	1133.43	1169.85	1333.27	1183.13	1139.33	1127.25
894	1166.64	1324.02	1195.51	1133.43	1133.43	1170.25	1332.54	1173.82	1131.56	1130.57
895	1168.08	1325.46	1195.51	1133.43	1133.43	1172.79	1326.29	1181.51	1135.79	1136.98
896	1169.52	1326.9	1195.51	1131.98	1131.98	1156.17	1325.63	1192.01	1129.58	1145.98
897	1172.41	1329.79	1194.07	1131.98	1131.98	1161.05	1323.38	1179.1	1117.96	1132.22
898	1173.85	1331.24	1194.07	1131.98	1131.98	1148.86	1308.48	1183.06	1115.5	1128.84
899	1176.74	1332.68	1194.07	1131.98	1131.98	1170.86	1337	1187.08	1116.06	1118.99
900	1178.19	1334.12	1194.07	1131.98	1131.98	1178.07	1354.46	1183.17	1123.68	1124.24
901	1181.07	1338.45	1194.07	1130.54	1130.54	1169.53	1329.15	1176.07	1119.29	1122.59
902	1182.52	1339.9	1192.63	1130.54	1130.54	1171.93	1340.46	1179.62	1120.58	1127.36
903	1183.96	1341.34	1192.63	1130.54	1130.54	1171.16	1332.18	1181.77	1130.73	1131.24
904	1185.41	1342.79	1192.63	1130.54	1130.54	1172.5	1345.62	1199.26	1121.29	1132.12
905	1188.29	1345.67	1192.63	1130.54	1130.54	1181.18	1340.91	1180.47	1121.49	1123.17
906	1189.74	1347.12	1192.63	1130.54	1130.54	1190.24	1362.31	1186.27	1122.74	1130.96
907	1191.18	1348.56	1191.18	1129.1	1129.1	1189.41	1363.23	1186	1125.21	1128.62
908	1192.63	1350.01	1191.18	1129.1	1129.1	1182.76	1348.29	1183.16	1126.1	1124.97
909	1195.51	1354.34	1191.18	1129.1	1129.1	1192.62	1350.32	1184.99	1123.38	1124.15
910	1196.96	1355.78	1191.18	1129.1	1129.1	1176.39	1341.77	1184.55	1123.09	1128.22
911	1198.4	1357.22	1191.18	1129.1	1129.1	1194.45	1361.84	1190.61	1131.66	1131.62
912	1201.29	1358.67	1191.18	1129.1	1129.1	1192.59	1358.01	1189.53	1135.57	1129.84
913	1204.18	1361.56	1189.74	1127.65	1127.65	1208.9	1384.07	1191.73	1119.84	1128.86
914	1205.62	1363	1189.74	1127.65	1127.65	1208.26	1375.97	1187.52	1130.83	1126.95
915	1207.06	1364.44	1189.74	1127.65	1127.65	1206.5	1373.23	1189.69	1132.25	1126.74
916	1208.51	1367.33	1189.74	1127.65	1127.65	1201.18	1370.48	1186.64	1138.85	1130.53
917	1211.4	1370.22	1189.74	1127.65	1127.65	1207.11	1364	1189.93	1126.05	1123.41
918	1212.84	1371.66	1188.29	1127.65	1127.65	1214.3	1381.4	1176.12	1133.33	1117.45
919	1214.28	1373.11	1188.29	1126.21	1126.21	1185.91	1337.85	1190.79	1120.03	1118
920	1215.73	1374.55	1188.29	1126.21	1126.21	1203.16	1357.72	1183.84	1119.67	1124.2
921	1208.51	1368.78	1181.07	1259.04	1118.99	1196.16	1355.11	1178.73	1241.06	1118.78
922	1208.51	1370.22	1182.52	1257.6	1117.54	1200.94	1356.42	1182.94	1246.93	1121.44
923	1208.51	1371.66	1185.41	1257.6	1117.54	1193.38	1369.53	1175.94	1246.53	1115.83
924	1208.51	1373.11	1186.85	1257.6	1117.54	1190.41	1365.06	1173.32	1227.39	1115.25
925	1207.06	1375.99	1189.74	1257.6	1117.54	1192.64	1374.4	1182.28	1250.93	1109.94
926	1207.06	1377.44	1191.18	1257.6	1117.54	1210.11	1394.02	1191.05	1256.15	1111.02
927	1207.06	1378.88	1192.63	1256.15	1117.54	1201.85	1396.5	1193.69	1255.92	1114.91
928	1207.06	1380.33	1194.07	1256.15	1116.1	1194.16	1376.75	1190.68	1234.98	1116.37
929	1207.06	1384.66	1196.96	1256.15	1116.1	1208.32	1381.49	1182.6	1246.22	1122.47
930	1205.62	1386.1	1199.84	1256.15	1116.1	1196.71	1388.43	1185.37	1246.81	1103.89
931	1205.62	1387.55	1201.29	1256.15	1116.1	1200.9	1386.21	1185.41	1254.5	1117.9
932	1205.62	1388.99	1202.73	1256.15	1116.1	1210.2	1397.63	1187.1	1257.7	1115.82
933	1205.62	1391.88	1205.62	1254.71	1114.66	1205.95	1391.68	1180.4	1245.25	1114.53
934	1205.62	1393.32	1207.06	1254.71	1114.66	1201.13	1387.16	1198.98	1240.47	1116.67
935	1205.62	1394.76	1208.51	1254.71	1114.66	1185.68	1383.6	1191.96	1231.45	1108.47
936	1204.18	1396.21	1209.95	1254.71	1114.66	1196.94	1372.79	1206.55	1255.33	1125.59
937	1204.18	1399.1	1214.28	1253.27	1114.66	1200.19	1400.78	1205.67	1245.4	1115.24
938	1204.18	1400.54	1215.73	1253.27	1114.66	1203.01	1403.56	1207.4	1254.98	1114.7
939	1204.18	1403.43	1217.17	1253.27	1113.21	1203.12	1403.02	1200.25	1243.92	1115.4
940	1204.18	1404.87	1218.61	1253.27	1113.21	1201.02	1391.43	1201.44	1222.09	1105.85
941	1202.73	1407.76	1221.5	1253.27	1113.21	1204.23	1407.97	1209.8	1242.99	1100.93
942	1202.73	1409.2	1222.95	1251.82	1113.21	1204.82	1399.67	1211.6	1239.82	1114.15
943	1202.73	1410.65	1224.39	1251.82	1113.21	1199.59	1421.63	1212.64	1245.46	1102.58
944	1202.73	1412.09	1225.83	1251.82	1113.21	1199.07	1401.46	1211.09	1231.85	1111.9
945	1202.73	1414.98	1230.17	1251.82	1111.77	1204.62	1423.93	1223.13	1232.2	1106.59
946	1201.29	1416.42	1231.61	1251.82	1111.77	1188.73	1409.67	1217.97	1225.89	1106.04
947	1201.29	1417.87	1233.05	1251.82	1111.77	1193.36	1415.69	1219.35	1224.48	1106.79
948	1201.29	1419.31	1234.5	1250.38	1111.77	1197.28	1420.27	1218.74	1238.61	1108.74
949	1201.29	1423.64	1237.38	1250.38	1111.77	1206.71	1445.1	1231.31	1259.53	1107.59
950	1201.29	1425.09	1238.83	1250.38	1111.77	1204.15	1443.54	1231.78	1259.95	1108.57
951	1201.29	1426.53	1240.27	1250.38	1110.33	1189.5	1409.92	1220.87	1226.25	1107.4
952	1199.84	1427.97	1241.72	1250.38	1110.33	1197.18	1429.76	1224.39	1231.85	1110.92
953	1199.84	1430.86	1246.05	1248.94	1110.33	1194.07	1422.43	1218.23	1239.47	1105.78
954	1199.84	1432.31	1247.49	1248.94	1110.33	1192.19	1434.31	1225.04	1226.36	1102.44
955	1199.84	1433.75	1248.94	1248.94	1110.33	1183.11	1415.93	1225.45	1211.44	1106.57
956	1199.84	1435.19	1250.38	1248.94	1110.33	1201.21	1450.22	1234.08	1231.56	1102.52
957	1198.4	1438.08	1253.27	1248.94	1108.88	1188.41	1427.85	1226.34	1219.78	1101.06
958	1198.4	1439.52	1254.71	1247.49	1108.88	1188.12	1427.9	1226.3	1219.58	1099.13
959	1198.4	1442.41	1256.15	1247.49	1108.88	1178.73	1415.08	1230.06	1216.72	1091.92
960	1198.4	1443.86	1257.6	1247.49	1108.88	1180.61	1439.06	1244.66	1226.35	1085.77
961	2.42	195.96	195.96	2.42	2.42	4.35	205.96	215.97	5.1	-2.33
962	5.29	195.96	195.96	5.29	5.29	0.13	207.65	219.73	-0.78	-7.18
963	8.16	195.96	195.96	6.72	8.16	8.71	203.39	215.4	10.45	7.26
964	9.59	195.96	195.96	9.59	9.59	2.61	201.2	216.52	8.56	-3.58
965	15.32	195.96	195.96	13.89	15.32	14.14	196.49	213.9	31.45	19.03
966	18.19	195.96	195.96	16.76	18.19	11.16	202.08	204.74	14.08	4.12
967	19.62	195.96	195.96	19.62	21.06	20.83	205.8	209.12	23.79	20.37
968	22.49	195.96	195.96	21.06	22.49	-2.17	194.48	217.38	10.28	2.95
969	28.23	195.96	195.96	26.79	28.23	12.42	197.54	214.14	29.85	19.27
970	31.09	195.96	195.96	29.66	31.09	18.14	201.97	210.63	22.68	14.69
971	32.53	195.96	195.96	31.09	32.53	16.82	201.99	209.15	28.63	13.94
972	35.39	194.52	194.52	33.96	35.39	21.29	201.28	207.58	30.73	23.53
973	41.13	194.52	194.52	38.26	41.13	27.5	202.22	213.79	43.73	30.54
974	42.56	194.52	194.52	41.13	42.56	37.41	202.34	202.79	42.57	36.14
975	45.43	194.52	194.52	44	45.43	49.22	210.75	202.44	40.93	36.52
976	48.3	194.52	194.52	45.43	48.3	58.67	199.33	199.18	57.41	49.42
977	52.6	194.52	194.52	51.16	52.6	51.27	197.36	199.86	59.9	48
978	55.46	194.52	194.52	52.6	55.46	59.97	198.44	207.54	62.85	55.03
979	58.33	194.52	194.52	55.46	58.33	65.45	197.97	197.47	70.7	58.28
980	61.2	194.52	194.52	58.33	61.2	62.4	196.9	203.71	66.54	56.1
981	65.5	194.52	194.52	62.63	65.5	65.24	203.2	206.01	68.8	69.06
982	68.37	194.52	194.52	64.07	68.37	60.39	205.28	204.84	62.69	62.7
983	71.23	194.52	194.52	66.93	71.23	67.28	192.19	203.73	82.5	72.62
984	72.67	194.52	194.52	69.8	72.67	77.43	192.99	204.06	83.68	74.12
985	78.4	194.52	194.52	74.1	78.4	88.01	186.6	188.75	100.01	93.9
986	79.84	194.52	194.52	76.97	81.27	81.96	186.38	190.75	90.73	79.49
987	82.7	194.52	194.52	78.4	82.7	86.37	191.15	206.55	82.79	74.93
988	85.57	193.09	193.09	81.27	85.57	86.59	201.58	198.66	86.06	83.51
989	89.87	193.09	193.09	85.57	91.3	87.29	195.6	201.31	88.99	84.77
990	92.74	193.09	193.09	88.44	92.74	82.28	199.93	206.41	85.82	79.36
991	95.61	193.09	193.09	91.3	95.61	94.6	194.45	204.59	100.01	94.79
992	98.47	193.09	193.09	92.74	98.47	96.49	193.79	198.68	91.36	91.7
993	102.77	193.09	193.09	98.47	102.77	109.23	198.2	202.51	107.84	110.08
994	105.64	193.09	193.09	99.91	105.64	102.75	193.84	196.02	101.87	94.57
995	108.51	193.09	193.09	102.77	108.51	116.54	194.18	195.73	111.01	115.12
996	109.94	193.09	193.09	104.21	109.94	106.27	193.99	198.54	100.83	104.47
997	115.68	193.09	193.09	109.94	115.68	107.79	195.4	201.2	104.38	108.73
998	117.11	193.09	193.09	111.38	118.54	106.28	196.45	207.8	99.64	102.03
999	119.98	193.09	193.09	114.24	119.98	117.09	197.68	201.87	117.63	115.89
1000	122.84	193.09	193.09	117.11	122.84	108.51	191.28	203.8	108.68	107.49
1001	127.14	193.09	193.09	121.41	128.58	126.44	190.46	197.84	127.12	127.56
1002	130.01	193.09	193.09	124.28	130.01	121.31	192.33	201.62	125.66	124.18
1003	132.88	193.09	193.09	125.71	132.88	130.68	190.72	196.12	132.32	130.1
1004	134.31	191.66	191.66	128.58	135.75	134.41	191.07	195.64	135.71	133.07
1005	140.05	191.66	191.66	132.88	140.05	140.4	190.3	192.82	134.78	140.33
1006	141.48	191.66	191.66	135.75	142.91	134.72	186.35	192.79	135.16	137.39
1007	144.35	191.66	191.66	137.18	145.78	133.24	187.15	193.51	133.29	136.35
1008	147.22	191.66	191.66	140.05	147.22	145.76	187.92	198.92	147.36	149.05
1009	151.52	191.66	191.66	144.35	152.95	158.33	192.67	194.18	149.82	154.05
1010	154.38	191.66	191.66	147.22	154.38	158.18	192.03	193.65	150.58	153.68
1011	157.25	191.66	191.66	148.65	157.25	156.55	187.86	201.93	155.43	151.99
1012	158.68	191.66	191.66	151.52	160.12	159.87	188.27	187.35	154	152.54
1013	164.42	191.66	191.66	155.82	164.42	169.18	190.64	195.11	161.39	158.78
1014	165.85	191.66	191.66	158.68	167.29	151.28	186.88	200.42	151.12	153.65
1015	168.72	191.66	191.66	160.12	170.15	167.64	186.78	192.07	160.03	161.55
1016	171.59	191.66	191.66	162.99	171.59	158.25	187.99	192.37	153.97	158.05
1017	175.89	191.66	191.66	167.29	177.32	174.38	187.04	189.01	174.44	170.55
1018	178.75	191.66	191.66	170.15	178.75	176.94	192.62	199.14	171.87	170.49
1019	181.62	191.66	191.66	171.59	181.62	180.45	190.19	200.01	174.63	171.31
1020	183.06	190.22	190.22	174.45	184.49	177.74	190.13	191.69	174	174.14
1021	185.92	378.03	188.79	177.32	187.36	188.2	370	200.25	181.15	185.14
1022	188.79	378.03	188.79	180.19	188.79	210.27	389.62	197.66	205.18	204
1023	191.66	378.03	188.79	181.62	191.66	215.9	383.5	189.9	206.8	205.23
1024	193.09	378.03	188.79	184.49	194.52	210.22	395.34	196.1	207.82	204.3
1025	198.83	376.59	188.79	188.79	198.83	197.5	381.46	193.93	195.82	184.96
1026	200.26	376.59	188.79	191.66	201.69	188.48	372.22	193.82	191.93	189.1
1027	203.13	376.59	188.79	193.09	203.13	188.94	358.44	195.95	188.77	186.74
1028	205.99	376.59	188.79	195.96	205.99	187.8	356.31	196.73	186.97	183.04
1029	210.29	376.59	188.79	200.26	210.29	220.42	379.73	194.6	214.41	217.33
1030	213.16	376.59	188.79	201.69	213.16	215.84	386.33	190.12	209.92	212.17
1031	214.6	376.59	188.79	204.56	216.03	222.97	374.04	199.18	213.65	215.73
1032	217.46	376.59	188.79	207.43	217.46	223.35	369.51	194.72	209.79	207.07
1033	221.76	376.59	187.36	211.73	223.2	225.87	377.74	194.32	224	223.25
1034	224.63	375.16	187.36	213.16	224.63	219.98	393.05	186.73	222.69	222.43
1035	226.06	375.16	187.36	216.03	227.5	226.69	386.87	193.81	224.77	220.31
1036	228.93	375.16	187.36	217.46	230.36	231.05	379.35	191.18	227.33	222.87
1037	233.23	375.16	187.36	221.76	234.67	225.63	371.19	200.71	221.7	220.72
1038	236.1	375.16	187.36	224.63	237.53	228.73	364.84	193	228.26	220.35
1039	238.97	375.16	187.36	227.5	238.97	237.94	376.14	190.23	231.41	227.29
1040	240.4	375.16	187.36	228.93	241.83	243.28	374.91	197.3	232.5	234.82
1041	246.13	375.16	187.36	233.23	244.7	228.18	373.09	192.7	222.62	221.22
1042	247.57	375.16	187.36	236.1	243.27	254.28	384.71	186.31	241.32	226.3
1043	250.44	373.73	187.36	237.53	243.27	263.37	386.38	189.92	249.69	234.75
1044	253.3	373.73	187.36	240.4	243.27	246.39	379.85	183.87	242.46	237.39
1045	257.6	373.73	187.36	244.7	243.27	262.19	379.64	188.27	257.33	242.7
1046	260.47	373.73	187.36	247.57	243.27	258.77	373.53	186.17	252.62	232.25
1047	261.9	373.73	187.36	249	243.27	254.87	368.25	186.14	244.18	233.56
1048	264.77	373.73	187.36	251.87	243.27	246.92	368.43	188.94	242.59	236.78
1049	269.07	373.73	187.36	256.17	243.27	268.86	379.15	187.48	258.62	237.38
1050	271.94	373.73	187.36	259.04	243.27	244.58	354.45	187.95	232.59	216.7
1051	273.37	373.73	187.36	260.47	243.27	251.12	373.47	190.62	243.05	226.36
1052	276.24	373.73	187.36	263.34	243.27	267.78	367.91	188.49	260.73	239.6
1053	280.54	373.73	185.92	267.64	243.27	259.64	372.46	196.25	252.23	233.01
1054	283.41	373.73	185.92	269.07	243.27	279.33	379.87	183.01	267.94	239.15
1055	286.28	373.73	185.92	271.94	243.27	284.34	377.8	183.96	270.7	238.58
1056	287.71	372.29	185.92	273.37	243.27	288.57	374.71	183.49	273.11	240.71
1057	293.44	372.29	185.92	279.11	243.27	288.52	371.34	182.54	275.7	243.99
1058	294.88	372.29	185.92	280.54	243.27	299.26	373.17	178	282.63	239.82
1059	297.74	372.29	185.92	283.41	243.27	309.45	379.22	179.76	288.72	243.15
1060	299.18	372.29	185.92	284.84	243.27	284.71	376.44	184.18	275.69	239.49
1061	304.91	372.29	185.92	289.14	243.27	301.37	376.88	170.76	282.02	237.97
1062	306.35	372.29	185.92	292.01	241.83	294.17	373.46	176.02	287.65	242.39
1063	309.21	372.29	185.92	294.88	241.83	313.55	375.38	187.89	304.17	243.95
1064	312.08	372.29	185.92	296.31	241.83	298.8	376.45	182.36	291.54	244.46
1065	316.38	372.29	185.92	300.61	241.83	308.96	372.07	178.27	303.31	243.11
1066	319.25	372.29	185.92	303.48	241.83	309.65	376.71	178.05	298.71	240.88
1067	320.68	372.29	185.92	304.91	241.83	320.82	371.47	185.62	308.46	235.89
1068	323.55	372.29	185.92	307.78	241.83	317.99	370.27	184.88	304.85	236.33
1069	327.85	370.86	185.92	312.08	241.83	316.23	375.82	181.02	304.9	238.77
1070	330.72	370.86	185.92	313.51	241.83	316.38	378.98	182.09	313.24	238.15
1071	332.15	370.86	185.92	316.38	241.83	330.22	380.35	181.77	320.69	241.9
1072	335.02	370.86	185.92	319.25	241.83	341.87	369.41	199.02	334.47	239.03
1073	339.32	370.86	185.92	323.55	241.83	335.91	373.83	184.26	334.19	247.16
1074	342.19	370.86	185.92	324.98	241.83	343.61	377.07	195.67	335.4	241.47
1075	343.62	370.86	185.92	327.85	241.83	334.53	376	184.8	322.71	233.91
1076	346.49	370.86	185.92	329.28	241.83	338.21	369.2	189.97	322.64	234.59
1077	350.79	370.86	185.92	333.58	241.83	353.12	365.54	208.6	352.01	239.62
1078	353.66	370.86	185.92	336.45	241.83	343.25	364.57	193.47	333.39	240.77
1079	356.52	370.86	185.92	337.89	241.83	342.38	362.79	192.1	332.24	239.79
1080	357.96	370.86	184.49	340.75	241.83	363.36	373.6	217	361.27	236.71
1081	359.39	366.56	366.56	342.19	238.97	375.72	357.14	365.78	353.51	231.86
1082	362.26	366.56	366.56	343.62	238.97	364.76	369.2	366.04	351.77	229.57
1083	363.69	366.56	366.56	346.49	238.97	374.53	366.15	372.15	356.47	229.65
1084	366.56	366.56	366.56	347.92	238.97	378.22	368.21	376.72	361	230.41
1085	370.86	366.56	366.56	353.66	238.97	365.15	369.31	371.38	352.38	232.93
1086	373.73	366.56	366.56	355.09	238.97	369.2	372.26	357.47	353.01	229.43
1087	375.16	366.56	366.56	357.96	238.97	355.37	367.26	344.14	344.37	238.56
1088	378.03	366.56	366.56	359.39	238.97	381.11	369.13	357.67	365.6	227.09
1089	382.33	366.56	366.56	363.69	238.97	395.76	369.02	365.76	382.66	233.75
1090	385.19	366.56	366.56	366.56	238.97	384.05	364.97	372.74	369.25	229.9
1091	386.63	365.12	365.12	367.99	238.97	377.39	363.02	360.38	362.89	229.27
1092	389.5	365.12	365.12	370.86	237.53	383.17	366.43	378.71	366.66	232.91
1093	393.8	365.12	365.12	375.16	237.53	387.88	359.22	369.51	379.64	237.05
1094	396.66	365.12	365.12	376.59	237.53	405.47	367.15	360.68	388.77	235.52
1095	398.1	365.12	365.12	379.46	237.53	382.24	367.4	353.6	377.07	230.43
1096	400.96	365.12	365.12	380.89	237.53	399.96	365.39	366.63	399.42	230.89
1097	405.27	365.12	365.12	385.19	237.53	401.38	367.2	363.2	381.99	222.43
1098	408.13	365.12	365.12	388.06	237.53	415.48	377.85	377.41	405.13	227.48
1099	409.57	365.12	365.12	389.5	237.53	421.64	369.25	366.08	413.41	239.1
1100	412.43	365.12	365.12	392.36	237.53	422.08	364.68	358.98	412.83	243.32
1101	416.73	365.12	365.12	396.66	237.53	415.07	367.97	367.02	404.2	221.61
1102	419.6	365.12	365.12	398.1	237.53	415.56	368.45	372.34	405.33	222.39
1103	421.03	365.12	365.12	400.96	237.53	415.48	367.95	359.82	404.97	233.74
1104	423.9	365.12	365.12	402.4	237.53	414.85	364.64	367.62	411.5	231.11
1105	428.2	363.69	363.69	406.7	237.53	419.41	370.03	350.44	401.62	229.02
1106	429.64	363.69	363.69	409.57	237.53	429.19	365.34	358.53	423.29	234.2
1107	432.5	363.69	363.69	411	237.53	451.42	373.1	380.85	441.76	237.96
1108	435.37	363.69	363.69	413.87	237.53	450.09	370.63	381.14	440.55	239.63
1109	439.67	363.69	363.69	418.17	237.53	440.09	367.54	366.35	435.29	243.22
1110	441.11	363.69	363.69	419.6	237.53	461.21	370.35	372.02	440.26	229.43
1111	443.97	363.69	363.69	422.47	237.53	443.72	368.3	360.07	436.28	237.59
1112	445.41	363.69	363.69	423.9	237.53	442.02	368.26	355.51	427.52	231.77
1113	451.14	363.69	363.69	428.2	236.1	432.85	354.53	350.44	423.04	227.58
1114	452.57	363.69	363.69	431.07	236.1	431.35	361.05	352.61	420.89	227.81
1115	455.44	363.69	363.69	432.5	236.1	443	358.65	343.71	428.87	220.94
1116	456.88	363.69	363.69	435.37	236.1	451.4	368.71	362.58	435.35	224.57
1117	461.18	363.69	363.69	439.67	236.1	466.92	356.22	360.58	458.44	244.05
1118	464.04	362.26	362.26	441.11	236.1	458.81	359.74	355.93	448.05	233.36
1119	466.91	362.26	362.26	443.97	236.1	456.29	369.63	363.61	443.34	225.06
1120	468.34	362.26	362.26	445.41	236.1	462.91	365.59	362.31	457.75	238.11
1121	471.21	362.26	362.26	449.71	238.97	471.44	361.66	360.4	452.62	231.66
1122	471.21	362.26	362.26	452.57	240.4	470.58	363.51	366.9	463.57	239.35
1123	471.21	362.26	362.26	454.01	243.27	474.1	373.75	367.33	464.73	238.25
1124	469.78	362.26	362.26	456.88	246.13	456.24	366.4	359.08	453.95	242.66
1125	469.78	362.26	362.26	461.18	250.44	468.44	363.67	358.06	463.06	250.26
1126	469.78	362.26	362.26	462.61	251.87	470.34	364.94	358.13	465.09	248.73
1127	469.78	362.26	362.26	465.48	254.74	463.27	356.79	354.43	457.26	252.54
1128	469.78	362.26	362.26	466.91	257.6	478.57	362.94	368.42	486.38	268.27
1129	469.78	362.26	362.26	471.21	261.9	469.89	366.52	360.19	469.92	250.26
1130	469.78	362.26	362.26	474.08	263.34	473.64	360.86	360.68	480.82	263.67
1131	469.78	362.26	362.26	475.51	266.21	477.64	361.89	359.76	482.57	263.85
1132	469.78	360.82	360.82	478.38	269.07	468.93	366.26	359.72	480.89	262.23
1133	469.78	360.82	360.82	482.68	273.37	472.19	354.11	352.26	486.61	274.54
1134	468.34	360.82	360.82	484.11	274.81	472.66	353	353.11	487.47	275.37
1135	468.34	360.82	360.82	485.55	277.67	468.06	363.64	356.85	493.34	278.81
1136	468.34	360.82	360.82	488.41	280.54	465.84	346.99	354.42	470.89	269.59
1137	468.34	360.82	360.82	492.72	284.84	477.73	352.02	355.49	498.38	284.47
1138	468.34	360.82	360.82	494.15	286.28	471.85	353.23	355.84	496.37	278.62
1139	468.34	360.82	360.82	497.02	289.14	475.67	365.08	351.64	501.5	294.94
1140	468.34	360.82	360.82	498.45	292.01	474.39	367.72	355.54	495.46	276.57
1141	464.04	535.72	357.96	498.45	293.44	469.13	535.38	356.47	529.23	304.35
1142	464.04	535.72	356.52	501.32	294.88	454.1	530.48	358.52	484.77	266.42
1143	464.04	535.72	356.52	502.75	297.74	458.86	545.99	354.16	516.34	299.61
1144	464.04	535.72	356.52	505.62	300.61	465.18	538.75	347.83	516.46	297.52
1145	464.04	535.72	356.52	508.48	304.91	475.52	536.46	351.75	519.06	297.88
1146	462.61	535.72	356.52	511.35	306.35	467.22	546.74	351.61	519.66	308.34
1147	462.61	535.72	356.52	512.79	309.21	476.78	549.15	360.97	533.44	316.36
1148	462.61	534.29	356.52	515.65	310.65	475.89	532.92	349.31	521.14	306.78
1149	462.61	534.29	356.52	519.95	316.38	462.39	514.13	339.74	513.12	298.83
1150	462.61	534.29	356.52	521.39	317.81	463.88	548.7	355.22	525.68	313.51
1151	462.61	534.29	356.52	524.25	320.68	461.15	543.98	351.89	538.83	327.21
1152	462.61	534.29	356.52	525.69	322.12	468.57	544.98	358.9	539.06	329.24
1153	462.61	534.29	356.52	529.99	326.42	463.9	553.36	363.41	546.77	326.84
1154	462.61	534.29	356.52	531.42	329.28	471.44	537.94	358.27	551.55	337.26
1155	462.61	534.29	356.52	534.29	332.15	473.63	556.19	356.92	562.03	338.25
1156	462.61	534.29	356.52	535.72	333.58	472.38	541.64	354.02	543.58	326.47
1157	461.18	532.86	355.09	540.02	337.89	461.11	539.22	346.17	527.97	318.88
1158	461.18	532.86	355.09	542.89	340.75	462.79	537.63	347.92	557	339.27
1159	461.18	532.86	355.09	544.33	342.19	465.39	540.4	350.6	561.24	352.16
1160	461.18	532.86	355.09	547.19	345.05	460.63	542.5	349.94	564.51	351.41
1161	461.18	532.86	355.09	550.06	349.35	457.63	535.45	347.4	570.16	355.71
1162	461.18	532.86	355.09	552.93	352.22	456.78	540.61	346.48	569.8	355.63
1163	461.18	532.86	355.09	554.36	353.66	453.24	533.35	354.34	566.75	349.34
1164	461.18	532.86	355.09	557.23	356.52	465.83	544.43	347.64	565.45	352.08
1165	461.18	532.86	355.09	561.53	360.82	462.52	538.79	351.99	555.62	342.92
1166	461.18	532.86	355.09	562.96	362.26	472.77	530.52	348.22	579.29	363.15
1167	461.18	531.42	355.09	565.83	365.12	463.6	534.58	340.57	553.08	349.06
1168	459.74	531.42	355.09	567.26	367.99	461.64	533.95	339.35	571.82	366.07
1169	459.74	531.42	355.09	571.56	372.29	467.03	534.2	346.52	578.76	368.63
1170	459.74	531.42	355.09	573	373.73	459.68	539.4	348.1	580.13	369.22
1171	459.74	531.42	353.66	575.86	376.59	463.39	533.75	348.89	585.45	371.2
1172	459.74	531.42	353.66	577.3	378.03	461.39	528.02	332.8	574.07	372.17
1173	459.74	531.42	353.66	581.6	382.33	462.57	526.34	334.18	560.33	355.1
1174	459.74	531.42	353.66	583.03	385.19	463.42	528.1	347.48	584.61	375.31
1175	459.74	531.42	353.66	585.9	386.63	457.71	523.39	346.84	598.32	385.06
1176	459.74	531.42	353.66	587.33	389.5	459.77	535.12	338.63	603.32	390.66
1177	459.74	529.99	353.66	591.63	393.8	458.41	533.62	353.77	602.93	391.22
1178	459.74	529.99	353.66	594.5	396.66	454.71	532.63	343.65	588.54	378.96
1179	458.31	529.99	353.66	595.94	398.1	457.42	535.44	350.54	602.74	392.37
1180	458.31	529.99	353.66	597.37	400.96	461.47	523.46	341.84	595.77	388.3
1181	458.31	529.99	353.66	601.67	405.27	466.12	531.72	343.34	596.28	389.34
1182	458.31	529.99	353.66	604.54	406.7	467.25	537.77	353.57	616.41	397.25
1183	458.31	529.99	353.66	605.97	409.57	462.79	531.62	350.95	604.95	394.36
1184	458.31	529.99	353.66	608.84	411	462.99	532.52	344.29	613.31	393.05
1185	458.31	529.99	352.22	611.7	416.73	457.46	523.72	339.13	610.05	392.76
1186	458.31	528.56	352.22	614.57	418.17	464.64	528.95	338.36	614.5	398.94
1187	458.31	528.56	352.22	616.01	421.03	458.93	519.89	338.33	615.1	406.25
1188	458.31	528.56	352.22	618.87	422.47	463.33	529.46	341.56	622.42	410.45
1189	458.31	528.56	352.22	623.17	426.77	463.01	530.36	341.52	605.13	390.61
1190	456.88	528.56	352.22	624.61	429.64	459.03	527.06	345.42	634.7	424.58
1191	456.88	528.56	352.22	626.04	431.07	460.5	517.85	328.96	603.95	409.44
1192	456.88	528.56	352.22	628.91	433.94	464.12	523.97	342.36	632.33	425.36
1193	456.88	528.56	352.22	633.21	438.24	453.44	532.48	352.18	631.72	422.17
1194	456.88	528.56	352.22	634.64	439.67	457.51	520.94	350.66	642.86	442.41
1195	456.88	528.56	352.22	637.51	442.54	457.09	523.08	349.22	643.83	433
1196	456.88	527.12	352.22	638.94	443.97	461.38	537.28	335.94	615.41	407.45
1197	456.88	527.12	352.22	643.24	449.71	456.23	524.84	354.14	650.6	436.33
1198	456.88	527.12	352.22	644.68	451.14	461.09	529.31	344.71	654.08	446.32
1199	456.88	527.12	352.22	647.55	454.01	469.29	524.22	351.61	652.7	441.49
1200	456.88	527.12	350.79	648.98	455.44	460.49	527.72	354.14	660.08	444.04
1201	454.01	522.82	522.82	644.68	455.44	464.54	517.6	510.26	647.69	451.37
1202	456.88	522.82	522.82	644.68	458.31	458.59	519.95	512.43	649.1	443.99
1203	458.31	522.82	522.82	644.68	459.74	461.5	527.68	532.88	654.08	465.28
1204	461.18	521.39	521.39	644.68	462.61	471.15	523.49	523.23	654.86	465.03
1205	465.48	521.39	521.39	644.68	466.91	481.92	515.48	520.23	649.65	475.65
1206	466.91	521.39	521.39	644.68	468.34	495.77	528.86	530.22	656.74	490.09
1207	469.78	521.39	521.39	644.68	471.21	482.7	523.9	513.49	654.76	474.62
1208	471.21	521.39	521.39	644.68	472.64	483.62	516.1	517.57	654.69	484.2
1209	475.51	521.39	521.39	643.24	476.95	481.07	521.5	506.6	662.58	469.48
1210	478.38	521.39	521.39	643.24	479.81	498.86	521.25	526.19	647.68	496.25
1211	479.81	521.39	521.39	643.24	481.25	474.98	517.27	491.54	640.38	450.82
1212	482.68	521.39	521.39	643.24	484.11	474.45	512.26	497.57	639.85	453.1
1213	486.98	519.95	519.95	643.24	488.41	479.28	521.39	502.07	654.13	472.36
1214	488.41	519.95	519.95	643.24	489.85	473.75	522.31	504.13	649.57	473.6
1215	491.28	519.95	519.95	643.24	492.72	476.71	506.33	508.87	650.12	474.21
1216	492.72	519.95	519.95	643.24	494.15	490.81	517.35	511.93	649.28	479.77
1217	497.02	519.95	519.95	641.81	498.45	505.34	512.72	519.03	658.44	504.25
1218	499.88	519.95	519.95	641.81	501.32	504.01	508.73	516.97	650.15	500.18
1219	501.32	519.95	519.95	641.81	502.75	518.31	510.23	509.43	651.53	510.98
1220	504.18	519.95	519.95	641.81	505.62	508.65	507.56	517.08	652.91	502.7
1221	508.48	519.95	519.95	641.81	509.92	514.91	523.51	529.27	650.57	517.44
1222	509.92	519.95	519.95	641.81	511.35	509.17	511.03	511.71	647.61	509.68
1223	512.79	518.52	518.52	641.81	514.22	513.11	515.31	516.08	649.06	512
1224	514.22	518.52	518.52	641.81	515.65	518.8	512.03	515.32	649.45	517.27
1225	518.52	518.52	518.52	640.38	519.95	510.61	499	514.1	650.83	514.87
1226	521.39	518.52	518.52	640.38	522.82	499.12	499.94	489.12	639.6	498.7
1227	522.82	518.52	518.52	640.38	524.25	535.79	519	522.61	639.14	541.54
1228	525.69	518.52	518.52	640.38	527.12	531.23	510.01	506.6	650.64	521.87
1229	529.99	518.52	518.52	640.38	531.42	531.43	508.53	515.02	649.83	528.62
1230	531.42	518.52	518.52	640.38	532.86	531.94	506.67	514.93	649.21	528.09
1231	534.29	518.52	518.52	640.38	535.72	526.28	514.45	506.47	657.84	525.05
1232	535.72	518.52	518.52	640.38	537.16	532.42	518.69	513.65	651.11	540.36
1233	540.02	517.09	517.09	638.94	541.46	533.41	513.06	503.24	651.74	534.83
1234	541.46	517.09	517.09	638.94	544.33	534.78	514.79	504.57	649.58	538.68
1235	544.33	517.09	517.09	638.94	545.76	542.4	515.9	494.78	658.95	542.76
1236	545.76	517.09	517.09	638.94	548.63	540.26	516.21	517.82	649.25	546.55
1237	550.06	517.09	517.09	638.94	552.93	543.28	510.22	510.72	653.23	548.91
1238	552.93	517.09	517.09	638.94	554.36	545.05	505.14	501.74	651.39	544.78
1239	554.36	517.09	517.09	638.94	557.23	544.66	495.46	510.46	638.8	545.03
1240	557.23	517.09	517.09	638.94	558.66	546.05	509.45	523.86	650.7	552.89
1241	561.53	517.09	517.09	637.51	562.96	555.33	515.56	509.22	654.84	555.65
1242	562.96	517.09	517.09	637.51	565.83	545.4	507.8	509.17	630.95	546.03
1243	565.83	515.65	515.65	637.51	567.26	551.34	494.02	491.15	650.08	548.36
1244	567.26	515.65	515.65	637.51	568.7	562.92	494.89	498.77	634.96	557.34
1245	571.56	515.65	515.65	637.51	573	565.98	497.48	511.3	647.21	563.46
1246	574.43	515.65	515.65	637.51	575.86	549.5	503.73	513.08	642.91	562.28
1247	575.86	515.65	515.65	637.51	577.3	561.94	515.3	502.63	644.76	564.5
1248	577.3	515.65	515.65	637.51	580.17	566.2	505.72	506.45	659.65	575.43
1249	581.6	515.65	515.65	636.08	584.47	580.86	503.36	503.15	650.64	583.88
1250	584.47	515.65	515.65	636.08	585.9	579.79	503.17	501.69	650.44	581.49
1251	585.9	515.65	515.65	636.08	588.77	579.43	499.5	505.09	648.28	581.93
1252	588.77	515.65	515.65	636.08	590.2	580.35	495.05	511.34	649.49	591.27
1253	593.07	514.22	514.22	636.08	594.5	584.78	507.4	499.44	637.51	590.2
1254	594.5	514.22	514.22	636.08	597.37	583.12	508.44	502.43	639.67	587.88
1255	597.37	514.22	514.22	636.08	598.8	582.57	505.14	510.48	643.09	587.44
1256	598.8	514.22	514.22	636.08	601.67	587.89	508.55	514.92	645.07	594.47
1257	603.1	514.22	514.22	634.64	604.54	600.46	500.26	502.75	653.97	587.58
1258	604.54	514.22	514.22	634.64	607.4	606.24	515.35	517.68	642.08	599.9
1259	607.4	514.22	514.22	634.64	608.84	595.26	504.92	512.97	632.2	597.95
1260	608.84	514.22	514.22	634.64	611.7	608.53	513.96	500.55	632.48	605.41
1261	608.84	679.08	509.92	628.91	610.27	614.02	678.01	509	648.77	624.6
1262	610.27	679.08	509.92	628.91	613.14	619.11	687.37	510.5	636.62	628.03
1263	613.14	679.08	508.48	628.91	614.57	611.08	672.77	503.41	641.21	622
1264	614.57	679.08	508.48	628.91	616.01	625.96	682.58	496.49	639.77	640.36
1265	618.87	677.65	508.48	628.91	620.31	615.64	659.11	499.74	648.14	617.11
1266	620.31	677.65	508.48	628.91	623.17	619.18	650.56	508.15	639.76	617.4
1267	623.17	677.65	508.48	627.47	624.61	620.36	671.35	500.11	649.66	632.67
1268	624.61	677.65	508.48	627.47	627.47	633.93	650.83	505.96	632.07	624.79
1269	628.91	677.65	508.48	627.47	631.78	648.77	665.54	506.03	632.53	634.5
1270	631.78	677.65	508.48	627.47	633.21	638.21	676.41	501.78	638.57	635.36
1271	633.21	677.65	508.48	627.47	634.64	648.55	678.11	498.53	634.87	636.65
1272	634.64	677.65	508.48	627.47	637.51	650.21	689.72	506.37	639.4	652.01
1273	638.94	676.22	507.05	627.47	641.81	636.65	675.78	502.57	631.91	644.66
1274	641.81	676.22	507.05	627.47	643.24	644.51	679.88	496.48	634.23	652.1
1275	643.24	676.22	507.05	626.04	646.11	632.51	668.9	493.83	636.22	637.48
1276	646.11	676.22	507.05	626.04	647.55	647.11	691.22	495.3	632.23	656.46
1277	648.98	676.22	507.05	626.04	651.85	651.28	665.76	508.12	636.41	651.12
1278	651.85	676.22	507.05	626.04	653.28	644.96	656.91	506.31	640.28	645.58
1279	653.28	676.22	507.05	626.04	656.15	653.45	631.62	496.08	638.02	649.46
1280	656.15	676.22	507.05	626.04	657.58	657.53	666.8	498.16	638.1	653.93
1281	660.45	674.78	507.05	626.04	660.45	649.29	666.99	500.51	639.55	651.62
1282	661.88	674.78	507.05	626.04	660.45	649.54	667.64	500.67	634.06	654.41
1283	664.75	674.78	507.05	626.04	660.45	649.6	649.92	512.23	635.07	644.17
1284	666.18	674.78	507.05	626.04	660.45	659.98	676.03	507.08	638.77	658.08
1285	670.48	674.78	505.62	624.61	659.01	660	655.69	490.64	633.02	661.83
1286	671.92	674.78	505.62	624.61	659.01	649.82	652.51	502.33	638.43	661.01
1287	674.78	674.78	505.62	624.61	659.01	667.8	647.61	495.84	641.79	649.82
1288	676.22	674.78	505.62	624.61	659.01	661.5	661.72	495.27	642.27	659.04
1289	680.52	674.78	505.62	624.61	659.01	667.82	665.48	492.49	638.7	656.7
1290	683.39	674.78	505.62	624.61	659.01	665.82	653.26	497.1	636.78	656.94
1291	684.82	674.78	505.62	624.61	659.01	669.25	652.36	496.97	637.79	657.91
1292	687.69	674.78	505.62	624.61	659.01	682.67	663.54	501.48	635.28	651.5
1293	691.99	674.78	505.62	624.61	659.01	682.54	673.05	497.74	632.99	661.73
1294	693.42	674.78	505.62	624.61	659.01	670.91	669.58	493.21	636.75	649.98
1295	696.29	674.78	505.62	624.61	659.01	694.9	681.42	495.66	629.39	672.21
1296	697.72	674.78	505.62	624.61	659.01	701.46	677.55	511.91	632.59	661.83
1297	702.02	673.35	505.62	624.61	659.01	690.04	678.75	501.98	633.07	653.9
1298	704.89	673.35	505.62	624.61	659.01	703.75	671.95	509.97	638.91	655.12
1299	706.32	673.35	505.62	624.61	659.01	686.6	666.77	496.88	643.13	651.4
1300	709.19	673.35	505.62	624.61	659.01	707.47	666.58	507.31	628.79	658.53
1301	712.06	673.35	505.62	624.61	657.58	688.91	656.77	497.51	634.71	649.87
1302	714.92	673.35	505.62	623.17	657.58	687.59	660.35	494.68	634.17	649.61
1303	716.36	673.35	505.62	623.17	657.58	689.46	657.64	498.64	638.27	646.24
1304	719.23	673.35	505.62	623.17	657.58	723.06	668.07	505.5	627.52	662.3
1305	723.53	673.35	505.62	623.17	657.58	704.07	668.25	494.03	631.85	653.3
1306	724.96	673.35	504.18	623.17	657.58	711.23	664.84	503.61	634.16	657.95
1307	727.83	673.35	504.18	623.17	657.58	688.89	655.3	485.19	628.97	658.61
1308	729.26	673.35	504.18	623.17	657.58	709.28	668.92	491.82	634.07	656.47
1309	733.56	673.35	504.18	623.17	657.58	677.9	639.11	487.84	634.15	642.45
1310	736.43	673.35	504.18	623.17	657.58	701.01	653.7	492.64	633.63	651.86
1311	737.86	673.35	504.18	623.17	657.58	714.93	662.18	485.52	638.72	657.82
1312	740.73	673.35	504.18	623.17	657.58	732.73	677.8	504.84	633.05	661.01
1313	745.03	671.92	504.18	623.17	657.58	731.28	665.51	499.27	628.72	656.06
1314	746.46	671.92	504.18	623.17	657.58	735.96	677.54	498.26	630.73	656.36
1315	747.9	671.92	504.18	623.17	657.58	739.26	668.69	497.94	630.96	659.84
1316	750.76	671.92	504.18	623.17	657.58	738.97	666.77	495.76	629.03	663.05
1317	755.07	671.92	504.18	623.17	656.15	703.99	637.43	491.8	631.01	648.46
1318	756.5	671.92	504.18	623.17	656.15	734.53	644.08	489.55	633.09	661.75
1319	759.37	671.92	504.18	623.17	656.15	740.28	667.41	489.09	630.62	658.55
1320	760.8	671.92	504.18	621.74	656.15	741.63	650.41	494.56	626.27	653.94
1321	759.37	666.18	666.18	617.44	650.41	769.25	653.66	660.08	620.23	642.95
1322	760.8	666.18	666.18	617.44	650.41	752.61	647.94	651.99	623.19	651.33
1323	763.67	666.18	666.18	617.44	650.41	748.58	652.91	639.7	624.55	638.19
1324	765.1	666.18	666.18	617.44	650.41	762.89	651.37	676.12	631.4	646.56
1325	769.4	666.18	666.18	617.44	650.41	751.87	662.25	658.29	624.25	645.53
1326	770.84	666.18	666.18	616.01	650.41	788.55	659.91	685.13	623.97	646.82
1327	773.7	666.18	666.18	616.01	650.41	788.4	660.21	672.89	624.47	643.42
1328	775.14	666.18	666.18	616.01	650.41	783.72	650.72	662.5	619.4	647.33
1329	779.44	664.75	664.75	616.01	650.41	774.22	644.39	667.18	621	648.49
1330	782.3	664.75	664.75	616.01	650.41	784.58	648.65	667.23	617.59	643.52
1331	783.74	664.75	664.75	616.01	650.41	766.35	653.81	646.78	613.32	636.72
1332	786.61	664.75	664.75	616.01	650.41	776.22	646.31	664.05	620.77	641
1333	789.47	664.75	664.75	616.01	650.41	753.27	635.14	639.64	622.54	634.84
1334	792.34	664.75	664.75	616.01	650.41	792.91	642.4	643.86	618.39	641.54
1335	793.77	664.75	664.75	616.01	650.41	785.54	654.33	659.66	630.66	651.13
1336	796.64	664.75	664.75	616.01	648.98	808.58	654.55	671.23	619.57	647.79
1337	800.94	664.75	664.75	616.01	648.98	790.72	649.05	666.31	619.89	644.2
1338	802.37	664.75	664.75	616.01	648.98	794.22	645.93	663.64	615.77	639.05
1339	805.24	664.75	664.75	616.01	648.98	793.01	648.73	649.86	612.53	639.36
1340	806.68	664.75	664.75	616.01	648.98	803.7	641.98	675.06	623.03	646.41
1341	810.98	664.75	664.75	616.01	648.98	799.13	644.59	662.36	627.89	649.5
1342	812.41	664.75	664.75	616.01	648.98	788.2	634.67	662.59	616	641.55
1343	815.28	664.75	664.75	614.57	648.98	808.66	661.99	667.5	623.7	655.52
1344	816.71	664.75	664.75	614.57	648.98	815.13	648.56	660.33	616.33	639.57
1345	821.01	663.31	663.31	614.57	648.98	818.26	656	655.75	619.42	649.52
1346	823.88	663.31	663.31	614.57	648.98	822.74	653.73	662.85	616.88	645.9
1347	825.31	663.31	663.31	614.57	648.98	823.15	653.06	663.36	618.05	645.96
1348	826.75	663.31	663.31	614.57	648.98	815.76	657.72	652.36	626.31	650.18
1349	831.05	663.31	663.31	614.57	648.98	804.62	639.38	657.15	616.53	644.74
1350	833.91	663.31	663.31	614.57	648.98	826.39	661	663.45	620.25	644.18
1351	835.35	663.31	663.31	614.57	648.98	828.31	664.61	661.61	620.91	644.84
1352	838.22	663.31	663.31	614.57	648.98	827.54	661.71	661.36	625.11	643.92
1353	841.08	663.31	663.31	614.57	647.55	826.91	653.62	664.2	619.44	645.3
1354	843.95	663.31	663.31	614.57	647.55	846.59	660.19	668.7	622.05	649.43
1355	845.38	663.31	663.31	614.57	647.55	842.02	665.16	674.34	620.04	646.43
1356	848.25	663.31	663.31	614.57	647.55	826.45	647.17	652.14	615.36	644.92
1357	852.55	663.31	663.31	614.57	647.55	845.65	672.68	671.75	613.6	643.06
1358	853.98	663.31	663.31	614.57	647.55	836.82	661.09	660.19	622.37	647.58
1359	856.85	663.31	663.31	614.57	647.55	837.28	666.67	671.27	621.69	646.44
1360	858.29	663.31	663.31	614.57	647.55	840.23	656.76	661.93	622.62	645.44
1361	862.59	663.31	663.31	613.14	647.55	863.81	665.79	671.63	627.2	652.8
1362	864.02	661.88	661.88	613.14	647.55	872.32	681.67	670.31	621.98	648.57
1363	866.89	661.88	661.88	613.14	647.55	865.83	653.29	662.86	626.2	655.59
1364	868.32	661.88	661.88	613.14	647.55	858.54	662.04	651.99	618.24	647.82
1365	872.62	661.88	661.88	613.14	647.55	863.89	682.56	660.06	621.72	651.69
1366	874.06	661.88	661.88	613.14	647.55	855.26	651.34	657.19	618.37	645.2
1367	876.92	661.88	661.88	613.14	647.55	856.43	652.25	658.32	618.62	645.8
1368	878.36	661.88	661.88	613.14	647.55	858.05	657.97	652.3	614.73	646.54
1369	875.49	821.01	656.15	607.4	641.81	878.35	813.62	644.9	619.22	648.41
1370	878.36	821.01	656.15	607.4	641.81	877.08	797.97	643.37	609.88	633.87
1371	879.79	821.01	656.15	607.4	641.81	879.31	816.16	648.71	608.74	634.84
1372	881.22	821.01	656.15	607.4	641.81	878.91	816.42	648.72	609.17	635.71
1373	885.52	819.58	656.15	607.4	640.38	881.74	818.22	645.62	609.01	646.73
1374	888.39	819.58	656.15	607.4	640.38	882.93	823.96	642.36	603.39	637.97
1375	889.82	819.58	656.15	607.4	640.38	888.65	820.51	640.53	606.61	639.66
1376	892.69	819.58	656.15	607.4	640.38	889.21	805.79	646.82	608.19	631.39
1377	895.56	819.58	656.15	607.4	640.38	892.77	812.43	638.38	603.01	637.95
1378	898.43	819.58	656.15	607.4	640.38	893.73	807.58	642.94	597.51	629.64
1379	899.86	819.58	656.15	607.4	640.38	873.54	801.33	640.1	605.1	632.44
1380	902.73	819.58	656.15	607.4	640.38	886.45	802.78	639.25	610.56	635.13
1381	905.59	819.58	654.71	607.4	640.38	901.85	814.41	637.2	612.56	637.3
1382	908.46	819.58	654.71	607.4	640.38	902.99	816.44	639.84	603.95	630.49
1383	909.9	819.58	654.71	607.4	640.38	899.27	819.08	645.84	603.17	631.98
1384	912.76	819.58	654.71	607.4	640.38	890.88	793.03	646.7	612.14	639.13
1385	917.06	818.14	654.71	607.4	640.38	908.19	822.5	658.19	610	645.08
1386	918.5	818.14	654.71	607.4	640.38	887.55	803.39	639.08	604.99	635.86
1387	919.93	818.14	654.71	605.97	640.38	897.57	815.46	638.7	590.2	627.36
1388	922.8	818.14	654.71	605.97	640.38	903.43	817.02	637.54	597.59	629.26
1389	927.1	818.14	654.71	605.97	640.38	913.83	822.69	646.69	603.98	633.96
1390	928.53	818.14	654.71	605.97	640.38	903.51	809.08	642.97	607.53	642.47
1391	929.97	818.14	654.71	605.97	638.94	918.23	811.24	648.17	604.81	631.21
1392	932.83	818.14	654.71	605.97	638.94	929.05	811.4	651.17	604.91	635.81
1393	937.13	818.14	654.71	605.97	638.94	926.43	806.37	643.22	603.65	625.84
1394	938.57	818.14	654.71	605.97	638.94	934.57	808.53	643.21	597.84	624.54
1395	940	818.14	654.71	605.97	638.94	933.3	808.16	643.68	599.37	625.38
1396	942.87	818.14	654.71	605.97	638.94	935.97	807.68	647.11	603.17	638.07
1397	947.17	818.14	654.71	605.97	638.94	935.92	821.42	640.88	598.3	629.97
1398	948.6	818.14	653.28	605.97	638.94	937.1	817.64	649.96	604.44	627.8
1399	951.47	816.71	653.28	605.97	638.94	940.95	812.85	641.56	615.48	643.07
1400	952.9	816.71	653.28	605.97	638.94	939.74	806.69	650.83	606.51	640.73
1401	954.34	816.71	653.28	607.4	640.38	942.97	812.57	643.54	612.14	642.54
1402	954.34	816.71	653.28	608.84	643.24	930.59	810.87	643.95	613.68	644.2
1403	954.34	816.71	653.28	611.7	644.68	941.03	811.63	629.37	611.73	634.93
1404	954.34	816.71	653.28	613.14	646.11	941.29	813.93	638.83	612.89	642.65
1405	954.34	816.71	653.28	617.44	650.41	946.12	817.52	650.1	609.89	642.9
1406	952.9	816.71	653.28	618.87	653.28	949.88	826.27	644.05	624.19	656.02
1407	952.9	815.28	653.28	620.31	654.71	948.32	812.4	637.91	616.38	646.11
1408	952.9	815.28	651.85	623.17	656.15	928.99	805.92	646.11	615.91	648.23
1409	952.9	815.28	651.85	626.04	660.45	951.18	815.51	661.37	629.2	659.27
1410	952.9	815.28	651.85	628.91	663.31	947.44	799.75	645.48	634.75	662.34
1411	952.9	815.28	651.85	630.34	664.75	935.81	800.16	644.31	626.52	659.75
1412	951.47	815.28	651.85	631.78	666.18	941.48	806.74	642.14	628.1	660.18
1413	951.47	813.84	651.85	636.08	670.48	932.3	810.38	638.35	622.13	646.43
1414	951.47	813.84	651.85	637.51	671.92	936.4	811.89	646.86	635.37	667.25
1415	951.47	813.84	651.85	638.94	674.78	956.13	816.39	658.48	642.84	674.44
1416	951.47	813.84	651.85	641.81	676.22	938.47	811.7	643.27	641.27	669.52
1417	950.04	813.84	650.41	644.68	680.52	930.12	783.06	632.59	632.11	661.84
1418	950.04	813.84	650.41	647.55	681.95	948.87	814.32	651.27	640.86	671.48
1419	950.04	813.84	650.41	648.98	684.82	935.74	808.69	642.74	637.13	670.93
1420	950.04	813.84	650.41	650.41	686.25	946.15	802.44	647.88	653.96	682.59
1421	950.04	812.41	650.41	654.71	690.55	936.68	810.17	643.13	652.56	680.32
1422	950.04	812.41	650.41	656.15	691.99	934.58	807.89	645.96	649.51	677.32
1423	950.04	812.41	650.41	657.58	694.85	953.65	802.18	638.91	653.9	685.26
1424	948.6	812.41	650.41	660.45	696.29	957.17	813.7	637.06	652.13	683.48
1425	948.6	812.41	648.98	663.31	700.59	940.88	803.62	642.47	654.28	687.75
1426	948.6	812.41	648.98	666.18	702.02	947.09	801.18	639.69	657.85	692.01
1427	948.6	810.98	648.98	667.62	704.89	944.43	803.71	634.53	645.23	677.36
1428	948.6	810.98	648.98	669.05	706.32	945.8	806.12	647.45	651.6	689.99
1429	947.17	810.98	648.98	673.35	710.62	948	801	634.07	657.67	684.49
1430	947.17	810.98	648.98	674.78	712.06	948.19	811.9	659.44	669.06	705.1
1431	947.17	810.98	648.98	676.22	713.49	929.2	807.65	633.36	655.72	681.81
1432	947.17	810.98	648.98	679.08	716.36	934.11	810.62	638.45	664.37	694.79
1433	947.17	810.98	647.55	681.95	720.66	949.89	806.93	638.98	674.52	707.79
1434	947.17	809.54	647.55	684.82	722.09	939.43	807	633.85	664.38	704.33
1435	945.74	809.54	647.55	686.25	723.53	924.24	802.62	633.32	674.33	710.96
1436	945.74	809.54	647.55	687.69	726.39	935.38	803.09	629.69	673.1	708.79
1437	945.74	809.54	647.55	691.99	729.26	943.19	812.8	638.97	684.26	717.27
1438	945.74	809.54	647.55	693.42	732.13	945.59	813.64	638.43	684.19	718.23
1439	945.74	809.54	647.55	694.85	733.56	946.76	812.63	633.97	669.41	708.19
1440	945.74	809.54	647.55	697.72	735	965.25	810.99	641.78	692.65	726.09
1441	937.13	802.37	802.37	694.85	733.56	933.22	806.99	774.73	691.51	727.18
1442	937.13	802.37	802.37	697.72	735	928.11	802.28	767.59	675.52	700.04
1443	937.13	802.37	802.37	699.15	737.86	930.26	791.74	757.89	687.18	706.64
1444	937.13	802.37	802.37	700.59	739.3	923.9	787.41	768.72	678.87	709.35
1445	935.7	800.94	800.94	704.89	743.6	935.41	791.07	761.69	681.9	708.55
1446	935.7	800.94	800.94	706.32	745.03	929.65	799.95	806.85	700.68	747.97
1447	935.7	800.94	800.94	707.76	747.9	933.12	783.19	800.95	711.43	742.52
1448	935.7	800.94	800.94	710.62	749.33	936.08	803.33	794.48	714.51	757.95
1449	935.7	800.94	800.94	713.49	753.63	921.02	796.44	793.73	712.22	738.64
1450	935.7	800.94	800.94	716.36	755.07	927.92	798.58	782.62	710.08	735.26
1451	935.7	799.51	799.51	717.79	756.5	930.45	789.02	758.67	683.24	714.41
1452	934.27	799.51	799.51	719.23	759.37	929.7	785.38	753.19	675.48	698.59
1453	934.27	799.51	799.51	723.53	762.23	925.07	786.26	772.87	697.98	723.33
1454	934.27	799.51	799.51	724.96	765.1	928.76	783.66	775.89	702.23	729.86
1455	934.27	799.51	799.51	726.39	766.53	936.02	793.96	801.74	717.59	745.67
1456	934.27	799.51	799.51	727.83	767.97	934.97	794.54	802.03	724.73	757.2
1457	932.83	799.51	799.51	732.13	772.27	925.22	803.67	795.45	735.11	773.67
1458	932.83	798.07	798.07	733.56	773.7	928.58	794.1	795.7	722.05	764.68
1459	932.83	798.07	798.07	736.43	776.57	940.11	796.07	790.59	719.67	756.7
1460	932.83	798.07	798.07	737.86	778	932.37	784.83	783.11	710.58	736.73
1461	932.83	798.07	798.07	740.73	782.3	933.08	791.75	787.62	732.01	758.21
1462	932.83	798.07	798.07	743.6	783.74	931.1	795.36	794.22	732.8	769.84
1463	932.83	798.07	798.07	745.03	785.17	931.24	813.86	801.95	751.35	796.58
1464	931.4	798.07	798.07	746.46	788.04	939.22	802.5	796.67	749.15	777.81
1465	931.4	796.64	796.64	750.76	790.91	934.27	794.37	788.89	745.96	780.09
1466	931.4	796.64	796.64	752.2	793.77	934.79	798.04	781.75	742.76	775.06
1467	931.4	796.64	796.64	753.63	795.21	934.2	796.24	790.02	736.57	780.96
1468	931.4	796.64	796.64	756.5	796.64	932.34	796.22	795.68	745.66	772.89
1469	929.97	796.64	796.64	759.37	800.94	922.96	782.81	781.77	717.46	746.86
1470	929.97	796.64	796.64	760.8	802.37	932.23	787.51	784.69	730.63	762.83
1471	929.97	796.64	796.64	763.67	805.24	918.85	783.13	787.1	737.81	764.27
1472	929.97	796.64	796.64	765.1	806.68	930.61	789.69	774.93	718.77	746.27
1473	929.97	795.21	795.21	767.97	810.98	926.63	784.69	800.48	748.91	787.39
1474	929.97	795.21	795.21	770.84	812.41	930.58	792.71	787.9	753.75	786.72
1475	929.97	795.21	795.21	772.27	813.84	931.81	790.08	789.5	751.83	785.66
1476	928.53	795.21	795.21	773.7	816.71	936.75	793.68	797.18	756.19	793.09
1477	928.53	795.21	795.21	778	819.58	940.8	792.27	793.58	748.93	797
[truncated: 4,524 more rows]
